# Supplementary material for: Enantioselective hydrogenation of α,β-disubstituted nitroalkenes
Source: Royal Society of Chemistry journal article supplement (doi:10.1039/c4cc03942d), 2014-06-17

Supporting Information

## **Enantioselective Hydrogenation of $\alpha,\beta$ -Disubstituted Nitroalkenes**

**Shengkun Li,<sup>\*a,b</sup> Kexuan Huang,<sup>b</sup> and Xumu Zhang<sup>\*b</sup>**

<sup>a</sup> *Lab of Pesticide Synthesis, College of Plant Protection, Nanjing Agricultural University, Nanjing210095 (P.R. China).*

*E-mail: saintkun001@njau.edu.cn*

<sup>b</sup> *Department of Chemistry and Chemical Biology and Department of Pharmaceutical Chemistry, Rutgers, the State University of New Jersey, Piscataway, New Jersey 08854(USA).*

*E-mail: xumu@rci.rutgers.edu*

## Contents

|                                                                                              |    |
|----------------------------------------------------------------------------------------------|----|
| 1 General remarks .....                                                                      | 3  |
| 2 Synthesis of ( <i>E</i> )- $\alpha,\beta$ -disubstituted nitroalkenes and racemates .....  | 3  |
| 2.1 Synthesis of $\alpha,\beta$ -disubstituted nitroalkenes .....                            | 3  |
| 2.2 Synthesis of the racemates .....                                                         | 4  |
| 3 Asymmetric hydrogenation of ( <i>E</i> )- $\alpha,\beta$ -disubstituted nitroalkenes ..... | 4  |
| 3.1 General procedure for asymmetric hydrogenation optimization.....                         | 4  |
| 3.2 Results of the optimization of asymmetric hydrogenation.....                             | 5  |
| 3.3 Application of asymmetric hydrogenation .....                                            | 9  |
| 4 Representative characterization data.....                                                  | 9  |
| 4.1 NMR data of ( <i>E</i> )- $\alpha,\beta$ -disubstituted nitroalkenes .....               | 9  |
| 4.2 Analytic data of $\alpha$ -chiral nitroalkanes .....                                     | 16 |
| 5 References.....                                                                            | 24 |
| 6 Representative HPLC traces .....                                                           | 25 |
| 7 NMR spectra .....                                                                          | 40 |
| 7.1 NMR spectra of $\alpha,\beta$ -Disubstituted Nitroalkenes .....                          | 40 |
| 7.2 NMR spectra of $\alpha$ -chiral nitroalkanes .....                                       | 40 |

## 1 General remarks

Starting materials, reagents and solvents were purchased from commercial sources (Sigma-Aldrich or TCI) and used without further purification. Unless otherwise noted, all reactions and manipulations that were sensitive to moisture or air were performed in a nitrogen-filled glovebox or using standard Schlenk techniques. Solvents were dried with standard procedures and degassed with N<sub>2</sub>.

Column chromatography was performed using 200-400 mesh silica gel supplied by Natland International Corp. Thin-layer chromatography (TLC) was performed on EM reagents 0.25 mm silica 60-F plates.

NMR spectra analysis were recorded on Bruker Avance 400 MHz for <sup>1</sup>H NMR, 376.5 MHz for <sup>19</sup>F NMR, and 100 MHz for <sup>13</sup>C NMR, with CDCl<sub>3</sub> as the solvent and tetramethylsilane (TMS) as the internal standard. Chemical shifts were reported in ppm, up field to TMS (0.00 ppm) and relative to CDCl<sub>3</sub> (7.26 ppm, 77.0 ppm) for <sup>1</sup>H NMR and <sup>13</sup>C NMR.

HPLC analysis was carried out on an Agilent 1200 series chromatograph on a chiral phase, with hexane/2-propanol as eluents and a UV-detector at 222 nm; GC analysis was carried out on Hewlett-Packard 7890 gas chromatography using chiral capillary columns. Optical rotation was obtained on a Perkin-Elmer 341 MC polarimeter.

## 2 Synthesis of (*E*)- $\alpha$ , $\beta$ -disubstituted nitroalkenes and racemates

### 2.1 Synthesis of $\alpha$ , $\beta$ -disubstituted nitroalkenes

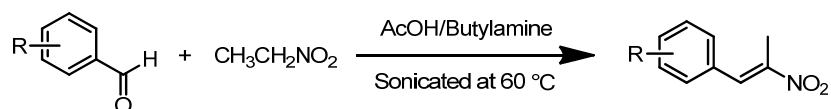

To a solution of benzaldehyde (5 mmol) in AcOH (2.5 mL), nitroethane (7.5 mmol) was added, followed by butylamine (10 mmol, 0.75 mL). The mixture was sonicated in a sealed flask (35 KHz frequency) at 60 °C, until TLC showed full conversion of aldehyde. The mixture was poured into ice water, extracted with EtOAc (3×15 mL). The combined organic extracts were washed with brine (2×10 mL) and dried over Na<sub>2</sub>SO<sub>4</sub>, solvent was evaporated and the product  $\alpha$ , $\beta$ -disubstituted nitroalkenes was purified by flash chromatography (hexane/ EtOAc, 15:1).<sup>1</sup>

## 2.2 Synthesis of the racemates

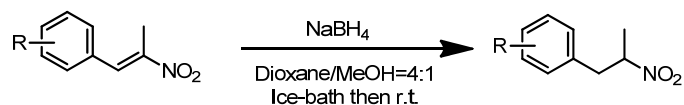

To a stirred solution of nitroalkene (1.00 mmol) in Dioxane :EtOH (4:1, 5mL) , NaBH<sub>4</sub> (1.50 mmol, 57 mg) was added step wise with an ice bath. Stirring was continued until gas evolution ceased, stirring is continued until the nitroalkenes was consumed, and the mixture was then quenched with saturated NH<sub>4</sub>Cl aqueous solution, the mixture is concentrated under reduced pressure and extracted with CH<sub>2</sub>Cl<sub>2</sub>(3 × 10mL). The organic layer was dried over Na<sub>2</sub>SO<sub>4</sub>, the solvent was evaporated in *vacuum* and the product nitroalkane was purified by flash chromatography (Hexane/AcOEt =15:1).<sup>2</sup>

## 3 Asymmetric hydrogenation of (*E*)- $\alpha,\beta$ -disubstituted nitroalkenes

### 3.1 General procedure for asymmetric hydrogenation optimization

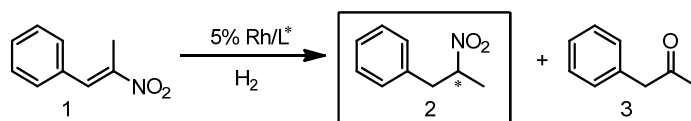

A stock solution was made by mixing Rh(NBD)<sub>2</sub>SbF<sub>6</sub> with the chiral ligands in a 1:1.1 molar ratio in DCM at room temperature for 15 min in a nitrogen-filled glovebox. A specified amount of the catalyst solution (0.5 mL, 0.005mmol) was transferred by syringe into a vial containing the substrate (0.1 mmol) in anhydrous DCM (1.5 mL). The resulting vials were transferred to an autoclave, which was pressurized with hydrogen gas(50atm) and depressurized three times before 80 atm of H<sub>2</sub> was set, and the reaction mixtures were stirred at 50°C, for 24 h. The autoclave was cooled to room temperature and the hydrogen gas was released slowly and carefully, the solution was then concentrated and passed through a short column of silica gel (eluant: CH<sub>2</sub>Cl<sub>2</sub>) to remove the metal complex, the eluate was concentrated under vacuum. The conversion as detected by <sup>1</sup>H NMR of the crude products and the ee values of all systems were determined by HPLC on a chiral stationary phase.



## 3.2 Results of the optimization of asymmetric hydrogenation

### Initial attempts with our previous catalysts<sup>3</sup>:

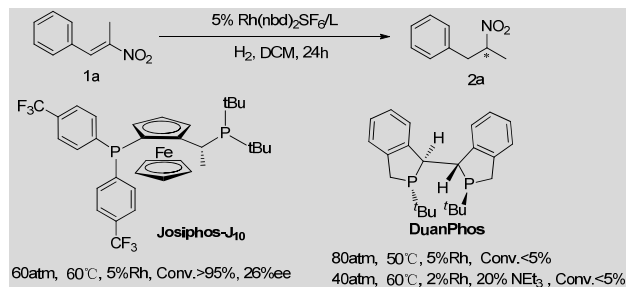

### Monodentate ligands scanning:

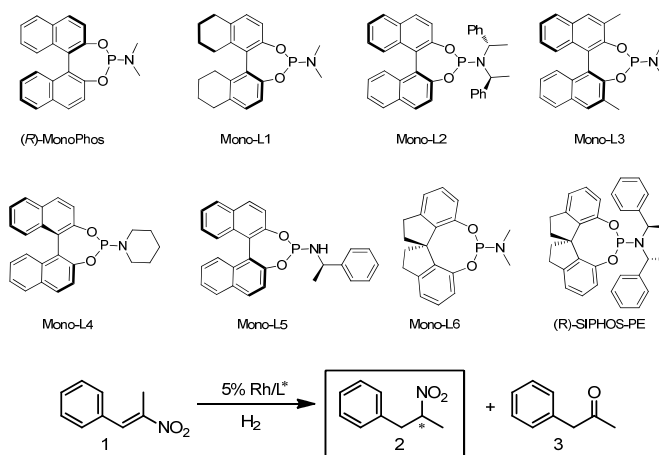

| Entry | Ligand        | Conv. <sup>[2]</sup> | Ee of 2a <sup>[3]</sup> |
|-------|---------------|----------------------|-------------------------|
| 1     | Mono-L1       | <5                   | N.A.                    |
| 2     | Mono-L2       | <5                   | N.A.                    |
| 3     | Mono-L3       | 6                    | 50                      |
| 4     | Mono-L4       | 3.3                  | N.A.                    |
| 5     | Mono-L5       | 7.2                  | N.A.                    |
| 6     | Mono-L6       | <5                   | N.A.                    |
| 7     | (R)-SIPHOS-PE | <5                   | N.A.                    |
| 8     | (R)-MonoPhos  | <5                   | N.A.                    |

[1]All reactions were carried out with a[Rh(nbd)<sub>2</sub>]BF<sub>4</sub>/ligand/substrate ratio of 1:1.1:20, under 80atm H<sub>2</sub> in dichloromethane, at 50°C for 24h.  
 [2]The conversion and molar ratio of products distribution were determined by <sup>1</sup>H NMR of the crude product of hydrogenation. [3]Enantiomeric excess was determined by HPLC on a chiral phase.[4] NA: Not available.

**Bidentate ligands scanning:**

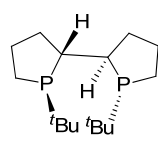

Tangphos

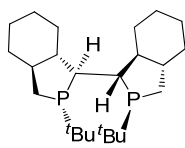

ZhangPhos

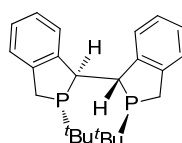

DuanPhos

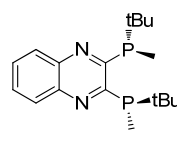

QuinoxP

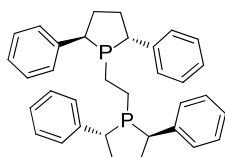

Ph-BPE

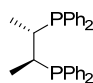

(S,S)-CHIRAPHOS

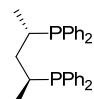

(S,S)-BDPP

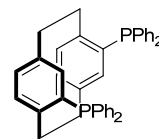

(S)-PhanePhos

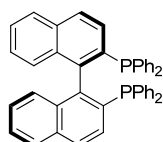

(R)-BINAP

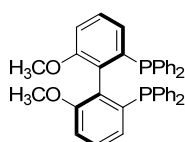

(R)-MeO-BIPHEP

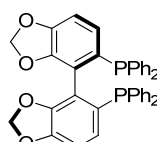

(R)-Segphos

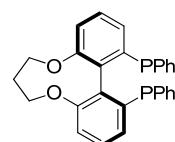

(S)-C<sub>3</sub>-TunePhos

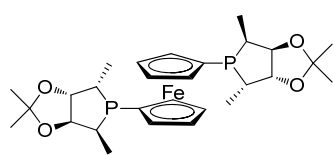

f-Ketalphos

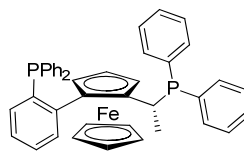

Walphos

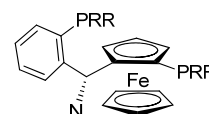

R= Ph TaniaPhos

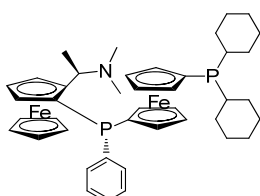

Chenphos

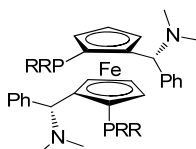

R=Ph Mandyphos

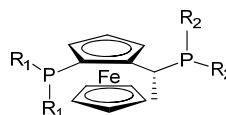

**JosiPhos Ligands:**

Josiphos-J<sub>1</sub>, R<sub>1</sub>=Ph R<sub>2</sub>=tBu

Josiphos-J<sub>2</sub>, R<sub>1</sub>=Cy R<sub>2</sub>=tBu

Josiphos-J<sub>3</sub>, R<sub>1</sub>=Cy R<sub>2</sub>=Cy

Josiphos-J<sub>4</sub>, R<sub>1</sub>=Ph R<sub>2</sub>=Cy

Josiphos-J<sub>5</sub>, R<sub>1</sub>=Ph R<sub>2</sub>=3,5-(CH<sub>3</sub>)<sub>2</sub>-Ph

Josiphos-J<sub>6</sub>, R<sub>1</sub>=4-MeO-3,5-(CH<sub>3</sub>)<sub>2</sub>-Ph R<sub>2</sub>=tBu

Josiphos-J<sub>7</sub>, R<sub>1</sub>=3,5-(CF<sub>3</sub>)<sub>2</sub>-Ph R<sub>2</sub>=Cy

Josiphos-J<sub>8</sub>, R<sub>1</sub>=3,5-(CF<sub>3</sub>)<sub>2</sub>-Ph R<sub>2</sub>=3,5-(CH<sub>3</sub>)<sub>2</sub>-Ph

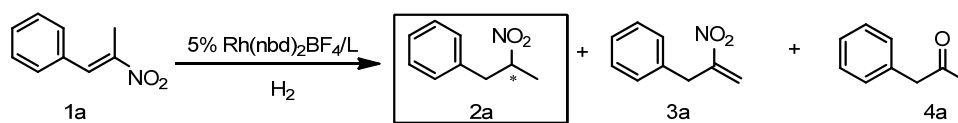

| Entry                                                                  | Ligand                     | Conv. <sup>[4]</sup> | Prod. Distribution <sup>[4]</sup> |      |    |      | Ee of 2a <sup>[5]</sup> |
|------------------------------------------------------------------------|----------------------------|----------------------|-----------------------------------|------|----|------|-------------------------|
|                                                                        |                            |                      | 1a                                | 2a   | 3a | 4a   |                         |
| <b>P-chiral ligands:</b>                                               |                            |                      |                                   |      |    |      |                         |
| 1                                                                      | TangPhos                   | 95                   | 0                                 | 100  | 0  | 0    | 6.8                     |
| 2                                                                      | ZhangPhos                  | 75                   | 25                                | 75   | 0  | 0    | 4.1                     |
| 3                                                                      | QuinoxP*                   | 5                    |                                   |      |    |      | N.A.                    |
| <b>ChiralBisphospholane ligands:</b>                                   |                            |                      |                                   |      |    |      |                         |
| 4                                                                      | (R)-Binaphane              | 16                   | 83.8                              | 16.2 | 0  | 0    | 39.7                    |
| 5                                                                      | (R,R)-Ph-BPE               | 92                   | 8.5                               | 63.8 | 0  | 27.7 | 35.2                    |
| 6                                                                      | (S,S)-Chiraphos            | 5                    |                                   |      |    |      | NA                      |
| 7                                                                      | (S,S)-BDPP                 | 6                    | 94.6                              | 5.4  | 0  | 0    | 40                      |
| <b>Planar chiral ligands:</b>                                          |                            |                      |                                   |      |    |      |                         |
| 8                                                                      | (S)-Phanephos              | 32                   | 67.7                              | 32.3 | 0  | 0    | 32.8                    |
| <b>Chiral axial ligands (AtropisomericBiarylBisphosphine Ligands):</b> |                            |                      |                                   |      |    |      |                         |
| 9                                                                      | R-Binap                    | 84                   | 15.9                              | 68.2 | 0  | 15.9 | 18                      |
| 10                                                                     | (R)-MeO-Biphep             | 15                   | 84.7                              | 15.3 | 0  | 0    | 7.2                     |
| 11                                                                     | S-C <sub>3</sub> -tunephos | 5                    |                                   |      |    |      | NA                      |
| <b>Ferrocene-based ligands:</b>                                        |                            |                      |                                   |      |    |      |                         |
| 12                                                                     | Et-f-ketalphos             | 95                   | 0                                 | 100  | 0  | 0    | 7.5                     |
| 13                                                                     | Josiphos-J1                | 95                   | 0                                 | 100  | 0  | 0    | 29.7                    |
| 14                                                                     | Walphos                    | 7                    | 92.6                              | 7.4  | 0  | 0    | 42                      |
| 15                                                                     | Mandyphos                  | 12                   | 88.1                              | 11.9 | 0  | 0    | 20.8                    |
| 16                                                                     | TaniaPhos                  | 59                   | 40.8                              | 59.2 | 0  | 0    | 58.6                    |
| 17                                                                     | Chenphos                   | 29                   | 71.2                              | 28.8 | 0  | 0    | 4                       |
| 18                                                                     | Josiphos-J1                | 42                   | 57.7                              | 42.3 |    | 0    | 34.8                    |
| 19                                                                     | Josiphos-J2                | 24                   | 76.2                              | 23.8 |    | 0    | 69.6                    |
| 20                                                                     | Josiphos-J3                | 21                   | 79.5                              | 20.5 |    | 0    | 33                      |
| 21                                                                     | Josiphos-J4                | <5                   | 95.8                              | 4.2  |    | 0    | NA                      |

|                   |             |     |      |      |   |      |      |
|-------------------|-------------|-----|------|------|---|------|------|
| 22 <sup>[2]</sup> | Josiphos-J2 | 38  | 62.3 | 37.7 |   | 0    | 87   |
| 24 <sup>[3]</sup> | Josiphos-J2 | 58  | 41.9 | 58.1 |   | 0    | 86   |
| 25 <sup>[3]</sup> | Josiphos-J1 | >95 | 0.9  | 99.1 | 0 | 0    | 27   |
| 26                | Josiphos-J5 | 5   | 94.6 | 5.4  | 0 | 0    | 77.2 |
| 27                | Josiphos-J6 | <5  |      |      |   |      | NA   |
| 28                | Josiphos-J7 | 57  | 43.4 | 56.6 | 0 | 0    | 3.8  |
| 29                | Josiphos-J8 | 14  | 86.3 | 2.6  | 0 | 11.1 |      |
| 30                | Walphos     | 7   | 92.9 | 7.1  | 0 | 0    | 19.8 |

[1]Unless otherwise mentioned, all reactions were carried out with a[Rh(nbd)<sub>2</sub>]BF<sub>4</sub>/ligand/substrate ratio of 1:1.1:20, under 80atm H<sub>2</sub> in dichloromethane, at 50°C for 24h; entries 18~23: 60atm, 40°C,36hrs; entries 26~31:60atm, 40°C,36hrs. [2]Rh(NBD)<sub>2</sub>SbF<sub>6</sub> as metal precursor.;[3] 60atm, 60°C, 24hrs. [4] theconversion and molar ratio of products distribution were determined by <sup>1</sup>H NMR of the crude product of hydrogenation. [5]Enantiomeric excess was determined by HPLC on a chiral phase. [6] NA: Not available; Cy: cyclohexyl; tBu:tert-butyl.

#### Other parameters optimization(typical results):

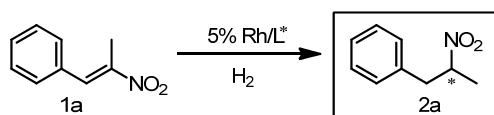

| Entry | H <sub>2</sub><br>(atm) | T<br>(°C) | Rh<br>(%) | Additive<br>(%)                     | T<br>(h) | Conv. <sup>[2]</sup><br>(%) | Ee <sup>[3]</sup><br>(%) |
|-------|-------------------------|-----------|-----------|-------------------------------------|----------|-----------------------------|--------------------------|
| 1     | 60                      | 40        | 5         | 10% NEt <sub>3</sub>                | 36       | 43                          | 43.6                     |
| 2     | 60                      | 40        | 5         | 10% PTSA                            | 36       | <5                          | NA                       |
| 3     | 60                      | 40        | 5         | 10% L-CSA                           | 36       | <5                          | NA                       |
| 4     | 60                      | 40        | 5         | 50% CH <sub>3</sub> NO <sub>2</sub> | 36       | 32                          | 49.3                     |
| 5     | 80                      | 70        | 2.5       |                                     | 24       | 49                          | 83.8                     |
| 6     | 80                      | 80        | 2.5       |                                     | 24       | 92                          | 85.2                     |
| 7     | 80                      | 80        | 2.5       |                                     | 24       | >95                         | 85.1                     |
| 8     | 50                      | 70        | 2.5       |                                     | 36       | >95                         | 86                       |

[1]Unless otherwise mentioned, all reactions were carried out with a[Rh(nbd)<sub>2</sub>]SbF<sub>6</sub>/ligand of 1:1.1, in dichloromethane. [2]theconversion and molar ratio of products distribution were determined by <sup>1</sup>H NMR of the crude product of hydrogenation. [3]Enantiomeric excess was determined by HPLC on a chiral phase.[d]Not available.

### 3.3 Application of asymmetric hydrogenation

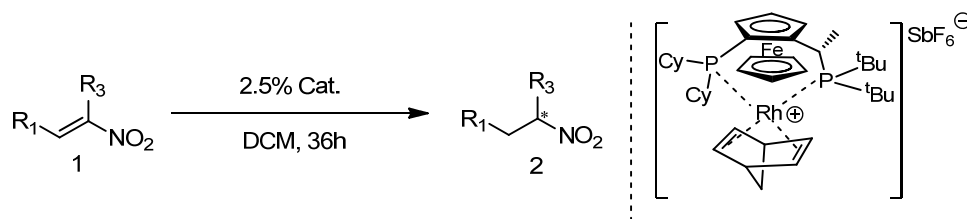

A stock solution was made by mixing  $Rh(nbd)_2SbF_6$  with JosiPhos in a 1:1.1 molar ratio in anhydrous DCM at room temperature for 15 min in a nitrogen-filled glovebox. To a vial containing the substrate (0.1 mmol) and a stir bar in anhydrous DCM (1 mL) was added an aliquot of the catalyst solution (0.25 mL, 0.0025 mmol) by syringe. The resulting vials were transferred to an autoclave, which then underwent three cycles of flushing with hydrogen gas by pressurizing to 50 atm and then depressurizing. The reaction was then stirred under  $H_2$  (50 atm) at 70°C, for 36 h. The autoclave was cooled to room temperature and the hydrogen gas was released slowly and carefully. The solution was concentrated and passed through a short column of silica gel (eluant:  $CH_2Cl_2$ ). The *ee* values of all compounds were determined by HPLC analysis or GC analysis on a chiral stationary phase.

## 4 Representative characterization data

Note: In  $^{13}C$  NMR spectrum, *C* in parentheses (*C*) stands for **quaternary carbon**, (*CH*) stands for **tertiary carbon**, (*CH*<sub>2</sub>) stands for **secondary carbon**, (*CH*<sub>3</sub>) stands for **primary carbon**. Spectral data were compared with the literature values<sup>1a, 4</sup>.

### 4.1 NMR data of (*E*)- $\alpha,\beta$ -disubstituted nitroalkenes

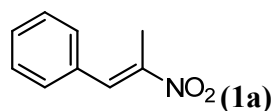

(*E*)-(2-nitroprop-1-en-1-yl)benzene

$^1H$ -NMR ( $CDCl_3$ , 400 MHz)  $\delta$ : 2.45(s, 3H, *CH*<sub>3</sub>), 7.39~7.48(m, 5H, aromatic *H*), 8.08(s, 1H, *CHCNO*<sub>2</sub>);

$^{13}\text{C}$ -NMR ( $\text{CDCl}_3$ , 100 MHz)  $\delta$ : 14.0( $\text{CH}_3$ ), 128.9( $2 \times \text{CH}$ ), 129.9( $\text{CH}$ ), 130.0( $2 \times \text{CH}$ ), 132.5( $\text{C}$ ), 133.5( $\text{CH}$ ), 147.8( $\text{C}$ ).

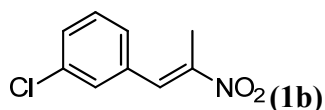

(*E*)-1-chloro-3-(2-nitroprop-1-en-1-yl)benzene

$^1\text{H}$ -NMR ( $\text{CDCl}_3$ , 400 MHz)  $\delta$ : 2.44(s, 3H,  $\text{CH}_3$ ), 7.29~7.31(m, 1H, aromatic  $H$ ), 7.39~7.40(m, 3H, aromatic  $H$ ), 7.99(s, 1H,  $\text{CHCNO}_2$ );

$^{13}\text{C}$ -NMR ( $\text{CDCl}_3$ , 100 MHz)  $\delta$ : 13.9( $\text{CH}_3$ ), 127.9( $\text{CH}$ ), 129.6( $\text{CH}$ ), 129.8( $\text{CH}$ ), 130.2( $\text{CH}$ ), 131.9( $\text{CH}$ ), 134.3( $\text{C}$ ), 134.9( $\text{C}$ ), 148.8( $\text{C}$ ).

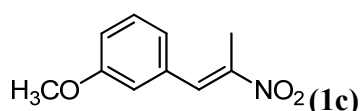

(*E*)-1-methoxy-3-(2-nitroprop-1-en-1-yl)benzene

$^1\text{H}$ -NMR ( $\text{CDCl}_3$ , 400 MHz)  $\delta$ : 2.43(s, 3H,  $\text{CH}_3$ ), 3.83(s, 3H,  $\text{OCH}_3$ ), 6.93~7.01(m, 3H, aromatic  $H$ ), 7.36(dd,  $J_1=J_2=8.0\text{Hz}$ , 1H, aromatic  $H$ ), 8.02(s, 1H,  $\text{CHCNO}_2$ );

$^{13}\text{C}$ -NMR ( $\text{CDCl}_3$ , 100 MHz)  $\delta$ : 14.0( $\text{CH}_3$ ), 55.3( $\text{CH}_3$ ), 115.4( $\text{CH}$ ), 115.5( $\text{CH}$ ), 122.3( $\text{CH}$ ), 129.9( $\text{CH}$ ), 133.4( $\text{CH}$ ), 133.7( $\text{C}$ ), 147.9( $\text{C}$ ), 159.8( $\text{C}$ ).

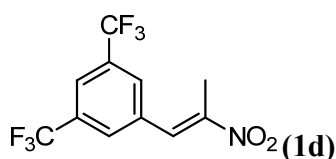

(*E*)-1-(2-nitroprop-1-en-1-yl)-3,5-bis(trifluoromethyl)benzene

$^1\text{H}$ -NMR ( $\text{CDCl}_3$ , 400 MHz)  $\delta$ : 2.46 (s, 3H,  $\text{CH}_3$ ), 7.86(s, 2H, aromatic  $H$ ), 7.94(s, 1H, aromatic  $H$ ), 8.09(s, 1H,  $\text{CHCNO}_2$ );

$^{13}\text{C}$ -NMR ( $\text{CDCl}_3$ , 100 MHz)  $\delta$ : 13.8( $\text{CH}_3$ ), 123.2(m,  $\text{CH}$ ), 123.9(q,  $J_{\text{CF}}=271\text{Hz}$ ,  $2 \times \text{CF}_3$ ), 129.4(m,  $2 \times \text{CH}$ ), 129.9( $\text{CH}$ ), 132.5(q,  $J_{\text{CF}}=34\text{Hz}$ ,  $2 \times \text{C}$ ), 134.7( $\text{C}$ ), 150.5( $\text{C}$ ).

$^{19}\text{F}$ -NMR ( $\text{CDCl}_3$ , 376.5 MHz)  $\delta$ : -63.2.

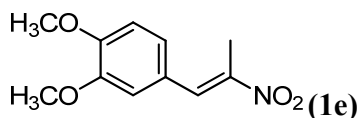

(*E*)-1,2-dimethoxy-4-(2-nitroprop-1-en-1-yl)benzene

$^1\text{H-NMR}$  ( $\text{CDCl}_3$ , 400 MHz)  $\delta$ : 2.49(s, 3H,  $\text{CH}_3$ ), 3.92(s, 3H,  $\text{OCH}_3$ ), 3.94(s, 3H,  $\text{OCH}_3$ ), 6.93~6.96(m, 2H, aromatic  $H$ ), 7.08 (dd,  $J_1=8.4\text{Hz}, J_2=2\text{Hz}$ , 1H, aromatic  $H$ ), 8.06(s, 1H,  $\text{CHCNO}_2$ );

$^{13}\text{C-NMR}$  ( $\text{CDCl}_3$ , 100 MHz)  $\delta$ : 14.1( $\text{CH}_3$ ), 56.01( $\text{CH}_3$ ), 56.02( $\text{CH}_3$ ), 111.3( $\text{CH}$ ), 113.2( $\text{CH}$ ), 124.0( $\text{CH}$ ), 125.1( $\text{C}$ ), 133.8( $\text{CH}$ ), 145.9( $\text{C}$ ), 149.2( $\text{C}$ ), 150.9( $\text{C}$ ).

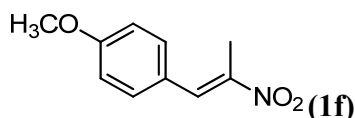

(*E*)-1-methoxy-4-(2-nitroprop-1-en-1-yl)benzene

$^1\text{H-NMR}$  ( $\text{CDCl}_3$ , 400 MHz)  $\delta$ : 2.46(s, 3H,  $\text{CH}_3$ ), 3.86(s, 3H,  $\text{OCH}_3$ ), 6.96~6.99 (m, 2H, aromatic  $H$ ), 7.39~7.43(m, 2H, aromatic  $H$ ), 8.06(s, 1H,  $\text{CHCNO}_2$ );

$^{13}\text{C-NMR}$  ( $\text{CDCl}_3$ , 100 MHz)  $\delta$ : 14.1( $\text{CH}_3$ ), 55.4( $\text{CH}_3$ ), 114.5( $2 \times \text{CH}$ ), 124.8( $\text{C}$ ), 132.1( $2 \times \text{CH}$ ), 133.6( $\text{CH}$ ), 145.8( $\text{C}$ ), 161.1( $\text{C}$ ).

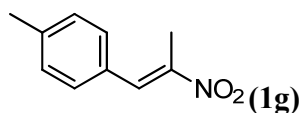

(*E*)-1-methyl-4-(2-nitroprop-1-en-1-yl)benzene

$^1\text{H-NMR}$  ( $\text{CDCl}_3$ , 400 MHz)  $\delta$ : 2.39(s, 3H,  $\text{PhCH}_3$ ), 2.43(s, 3H,  $\text{NO}_2\text{CCH}_3$ ), 7.25(d,  $J=8.0\text{Hz}$ , 2H, aromatic  $H$ ), 7.32(d,  $J=8.0\text{Hz}$ , 2H, aromatic  $H$ ), 8.04(s, 1H,  $\text{CHCNO}_2$ );

$^{13}\text{C-NMR}$  ( $\text{CDCl}_3$ , 100 MHz)  $\delta$ : 13.0( $\text{CH}_3$ ), 20.4( $\text{CH}_3$ ), 128.5( $\text{C}$ ), 128.7( $2 \times \text{CH}$ ), 129.1( $2 \times \text{CH}$ ), 132.6( $\text{CH}$ ), 139.5( $\text{C}$ ), 145.9( $\text{C}$ ).

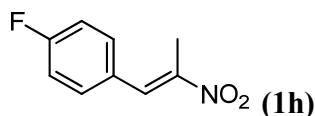

(*E*)-1-fluoro-4-(2-nitroprop-1-en-1-yl)benzene

$^1\text{H-NMR}$  ( $\text{CDCl}_3$ , 400 MHz)  $\delta$ : 2.44(s, 3H,  $\text{CH}_3$ ), 7.13~7.18(m, 2H, aromatic  $H$ ), 7.42~7.45(m, 2H, aromatic  $H$ ), 8.05(s, 1H,  $\text{CHCNO}_2$ );

$^{13}\text{C-NMR}$  ( $\text{CDCl}_3$ , 100 MHz)  $\delta$ : 13.9( $\text{CH}_3$ ), 116.1(d,  $J_{\text{CF}}=21\text{Hz}$ ,  $2 \times \text{CH}$ ), 128.6(d,  $J_{\text{CF}}=3\text{Hz}$ ,  $C$ ), 131.9(d,  $J_{\text{CF}}=9\text{Hz}$ ,  $2 \times \text{CH}$ ), 132.4( $\text{CH}$ ), 147.6( $C$ ), 163.5(d,  $J_{\text{CF}}=251\text{Hz}$ ,  $C$ ).

$^{19}\text{F-NMR}$  ( $\text{CDCl}_3$ , 376.5 MHz)  $\delta$ : -109.4.

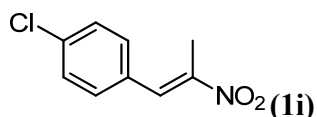

(*E*)-1-chloro-4-(2-nitroprop-1-en-1-yl)benzene

$^1\text{H-NMR}$  ( $\text{CDCl}_3$ , 400 MHz)  $\delta$ : 2.43(s, 3H,  $\text{CH}_3$ ), 7.36~7.38(m, 2H, aromatic  $H$ ), 7.42~7.44(m, 2H, aromatic  $H$ ), 8.02(s, 1H,  $\text{CHCNO}_2$ );

$^{13}\text{C-NMR}$  ( $\text{CDCl}_3$ , 100 MHz)  $\delta$ : 13.9( $\text{CH}_3$ ), 129.2( $2 \times \text{CH}$ ), 130.9( $C$ ), 131.2( $2 \times \text{CH}$ ), 132.1( $\text{CH}$ ), 136.1( $C$ ), 148.1( $C$ ).

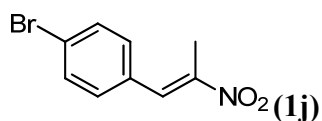

(*E*)-1-bromo-4-(2-nitroprop-1-en-1-yl)benzene

$^1\text{H-NMR}$  ( $\text{CDCl}_3$ , 400 MHz)  $\delta$ : 2.43(s, 3H,  $\text{NO}_2\text{CCH}_3$ ), 7.31(dd,  $J_1=8.4\text{Hz}, J_2=2.0\text{Hz}$ , 2H, aromatic  $H$ ), 7.59(d,  $J_1=8.4\text{Hz}, J_2=2.0\text{Hz}$ , 2H, aromatic  $H$ ), 8.00(s, 1H,  $\text{CHCNO}_2$ );

$^{13}\text{C-NMR}$  ( $\text{CDCl}_3$ , 100 MHz)  $\delta$ : 14.0( $\text{CH}_3$ ), 124.4( $C$ ), 131.4( $2 \times \text{CH}$ ), 132.2( $2 \times \text{CH}$ ), 132.3( $\text{CH}$ ), 139.5( $C$ ), 148.2( $C$ ).

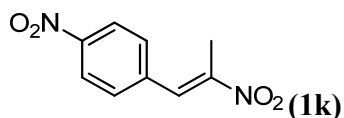

(*E*)-1-nitro-4-(2-nitroprop-1-en-1-yl)benzene

$^1\text{H-NMR}$  ( $\text{CDCl}_3$ , 400 MHz)  $\delta$ : 2.47(s, 3H,  $\text{NO}_2\text{CCH}_3$ ), 7.61(d,  $J=8.4\text{Hz}$ , 2H, aromatic  $H$ ), 8.09(s, 1H,  $\text{CHCNO}_2$ ), 8.32(d,  $J=8.4\text{Hz}$ , 2H, aromatic  $H$ );

$^{13}\text{C-NMR}$  ( $\text{CDCl}_3$ , 100 MHz)  $\delta$ : 14.1( $\text{CH}_3$ ), 124.1( $2 \times \text{CH}$ ), 130.6( $2 \times \text{CH}$ ), 130.7( $\text{CH}$ ), 138.9( $C$ ), 148.2( $C$ ), 150.3( $C$ ).



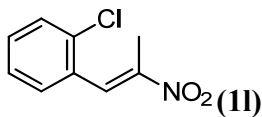

(*E*)-1-chloro-2-(2-nitroprop-1-en-1-yl)benzene

$^1\text{H-NMR}$  ( $\text{CDCl}_3$ , 400 MHz)  $\delta$ : 2.34(s, 3H,  $\text{CH}_3$ ), 7.33~7.38(m, 3H, aromatic  $H$ ), 7.46~7.49(m, 1H, aromatic  $H$ ), 8.17(s, 1H,  $\text{CHCNO}_2$ );

$^{13}\text{C-NMR}$  ( $\text{CDCl}_3$ , 100 MHz)  $\delta$ : 13.9( $\text{CH}_3$ ), 126.9( $\text{CH}$ ), 129.9( $\text{CH}$ ), 130.2( $\text{CH}$ ), 130.6( $\text{CH}$ ), 130.9( $\text{CH}$ ), 131.3 (C), 134.8(C), 149.3(C).

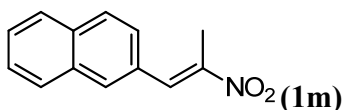

(*E*)-2-(2-nitroprop-1-en-1-yl)naphthalene

$^1\text{H-NMR}$  ( $\text{CDCl}_3$ , 400 MHz)  $\delta$ : 2.48(s, 3H,  $\text{NO}_2\text{CCH}_3$ ), 7.44 (dd,  $J_1=8.4\text{Hz}$ ,  $J_2=1.2\text{Hz}$ , 1H, aromatic  $H$ ), 7.49~7.55(m, 2H, aromatic  $H$ ), 7.82~7.86(m, 4H, aromatic  $H$ ), 8.17(s, 1H,  $\text{CHCNO}_2$ );

$^{13}\text{C-NMR}$  ( $\text{CDCl}_3$ , 100 MHz)  $\delta$ : 14.2( $\text{CH}_3$ ), 126.4( $\text{CH}$ ), 126.9( $\text{CH}$ ), 127.7( $\text{CH}$ ), 127.8( $\text{CH}$ ), 128.5( $\text{CH}$ ), 128.7( $\text{CH}$ ), 129.9(C), 130.6( $\text{CH}$ ), 133.1(C), 133.6(C), 133.7( $\text{CH}$ ), 147.8(C).

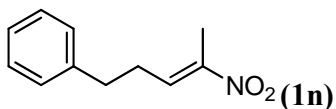

(*E*)-(4-nitropent-3-en-1-yl)benzene

$^1\text{H-NMR}$  ( $\text{CDCl}_3$ , 400 MHz)  $\delta$ : 2.03(d,  $J=0.8\text{Hz}$ , 3H,  $\text{NO}_2\text{CCH}_3$ ), 2.54(m, 2H,  $\text{PhCH}_2\text{CH}_2$ ), 2.80(t,  $J=7.6\text{Hz}$ , 3H,  $\text{PhCH}_2\text{CH}_2$ ), 7.12(td,  $J_1=7.6\text{Hz}$ ,  $J_2=0.8\text{Hz}$ , 1H,  $\text{NO}_2\text{CCH}$ ), 7.14~7.19(m, 2H, aromatic  $H$ ), 7.21~7.23(m, 1H, aromatic  $H$ ), 7.27~7.31(m, 2H, aromatic  $H$ ),

$^{13}\text{C-NMR}$  ( $\text{CDCl}_3$ , 100 MHz)  $\delta$ : 12.4( $\text{CH}_3$ ), 29.9( $\text{CH}_2$ ), 34.4( $\text{CH}_2$ ), 126.5( $\text{CH}$ ), 128.4( $2\times\text{CH}$ ), 128.7( $2\times\text{CH}$ ), 134.8( $\text{CH}$ ), 140.1(C), 148.2(C).

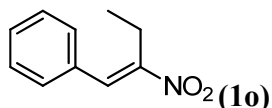

(*E*)-(2-nitrobut-1-en-1-yl)benzene

$^1\text{H-NMR}$  ( $\text{CDCl}_3$ , 400 MHz)  $\delta$ : 1.27(t,  $J=7.6\text{Hz}$ , 3H,  $\text{CH}_3$ ), 2.86(q,  $J=7.6\text{Hz}$ , 2H,  $\text{CH}_2$ ), 7.39~7.47(m, 5H, aromatic  $H$ ), 8.01(s, 1H,  $\text{CHCNO}_2$ );

$^{13}\text{C-NMR}$  ( $\text{CDCl}_3$ , 100 MHz)  $\delta$ : 12.5( $\text{CH}_3$ ), 20.7( $\text{CH}_2$ ), 129.0( $2 \times \text{CH}$ ), 129.6( $2 \times \text{CH}$ ), 129.9( $\text{CH}$ ), 132.4( $\text{C}$ ), 133.1( $\text{CH}$ ), 153.4( $\text{C}$ ).

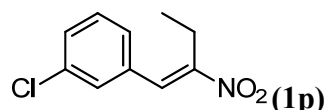

(*E*)-1-chloro-3-(2-nitrobut-1-en-1-yl)benzene

$^1\text{H-NMR}$  ( $\text{CDCl}_3$ , 400 MHz)  $\delta$ : 1.27(t,  $J=7.2\text{Hz}$ , 3H,  $\text{CH}_3$ ), 2.84(q,  $J=7.6\text{Hz}$ , 2H,  $\text{CH}_2$ ), 7.29(m, 1H, aromatic  $H$ ), 7.37~7.41(m, 3H, aromatic  $H$ ), 7.92(s, 1H,  $\text{CHCNO}_2$ );

$^{13}\text{C-NMR}$  ( $\text{CDCl}_3$ , 100 MHz)  $\delta$ : 12.4( $\text{CH}_3$ ), 20.7( $\text{CH}_2$ ), 127.5( $\text{CH}$ ), 129.3( $\text{CH}$ ), 129.9( $\text{CH}$ ), 130.2( $\text{CH}$ ), 131.4( $\text{CH}$ ), 134.2( $\text{C}$ ), 135.0( $\text{C}$ ), 154.4( $\text{C}$ ).

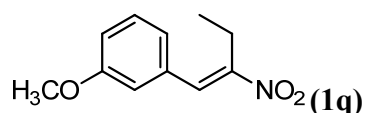

(*E*)-1-methoxy-3-(2-nitrobut-1-en-1-yl)benzene

$^1\text{H-NMR}$  ( $\text{CDCl}_3$ , 400 MHz)  $\delta$ : 1.27(t,  $J=7.2\text{Hz}$ , 3H,  $\text{CH}_3$ ), 2.87(q,  $J=7.2\text{Hz}$ , 2H,  $\text{CH}_2$ ), 3.84(s, 3H,  $\text{OCH}_3$ ), 6.94~7.01(m, 3H, aromatic  $H$ ), 7.36(dd,  $J_1=J_2=8.0\text{Hz}$ , 1H, aromatic  $H$ ), 7.98(s, 1H,  $\text{CHCNO}_2$ );

$^{13}\text{C-NMR}$  ( $\text{CDCl}_3$ , 100 MHz)  $\delta$ : 12.5( $\text{CH}_3$ ), 20.8( $\text{CH}_2$ ), 55.3( $\text{OCH}_3$ ), 115.1( $\text{CH}$ ), 115.5( $\text{CH}$ ), 121.9( $\text{CH}$ ), 130.0( $\text{CH}$ ), 132.9( $\text{CH}$ ), 133.7( $\text{C}$ ), 153.6( $\text{C}$ ), 159.9( $\text{C}$ ).

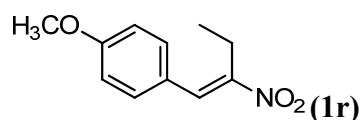

(*E*)-1-methoxy-4-(2-nitrobut-1-en-1-yl)benzene

$^1\text{H-NMR}$  ( $\text{CDCl}_3$ , 400 MHz)  $\delta$ : 1.28(t,  $J=7.6\text{Hz}$ , 3H,  $\text{CH}_3$ ), 2.88(q,  $J=7.6\text{Hz}$ , 2H,  $\text{CH}_2$ ), 3.86(s, 3H,  $\text{OCH}_3$ ), 6.98(d,  $J=8.8\text{Hz}$ , 2H, aromatic  $H$ ), 7.40(d,  $J=8.8\text{Hz}$ , 2H, aromatic  $H$ ), 7.99(s, 1H,  $\text{CHCNO}_2$ );

$^{13}\text{C-NMR}$  ( $\text{CDCl}_3$ , 100 MHz)  $\delta$ : 12.3( $\text{CH}_3$ ), 20.8( $\text{CH}_2$ ), 55.4( $\text{OCH}_3$ ), 114.6( $2 \times \text{CH}$ ), 124.6( $\text{C}$ ), 131.8( $2 \times \text{CH}$ ), 133.2( $\text{CH}$ ), 151.3( $\text{C}$ ), 161.2( $\text{C}$ ).

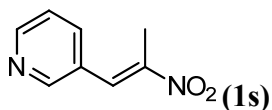

(E)-3-(2-nitroprop-1-en-1-yl)pyridine

$^1\text{H-NMR}$  ( $\text{CDCl}_3$ , 400 MHz)  $\delta$ : 2.47(s, 3H,  $\text{NO}_2\text{CCH}_3$ ), 7.45 (m, 1H, aromatic *H*), 7.81(d,  $J=6.4\text{Hz}$ , 1H, aromatic *H*), 8.04(s, 1H,  $\text{CHCNO}_2$ ), 8.66(m, 1H, aromatic *H*), 8.71(s, 1H, aromatic *H*);

$^{13}\text{C-NMR}$  ( $\text{CDCl}_3$ , 100 MHz)  $\delta$ : 13.9( $\text{CH}_3$ ), 123.6( $\text{CH}$ ), 128.5( $\text{C}$ ), 129.8( $\text{CH}$ ), 136.6( $\text{CH}$ ), 149.2( $\text{C}$ ), 150.5( $\text{CH}$ ), 150.6( $\text{CH}$ ).

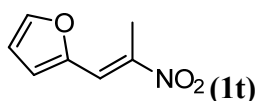

(E)-2-(2-nitroprop-1-en-1-yl)furan

$^1\text{H-NMR}$  ( $\text{CDCl}_3$ , 400 MHz)  $\delta$ : 2.57(s, 3H,  $\text{NO}_2\text{CCH}_3$ ), 6.59 (m, 1H, aromatic *H*), 6.83(d,  $J=3.2\text{Hz}$ , 1H, aromatic *H*), 7.65(d,  $J=1.6\text{Hz}$ , 1H, aromatic *H*), 7.83(s, 1H,  $\text{CHCNO}_2$ );

$^{13}\text{C-NMR}$  ( $\text{CDCl}_3$ , 100 MHz)  $\delta$ : 13.9( $\text{CH}_3$ ), 112.9( $\text{CH}$ ), 119.2( $\text{CH}$ ), 120.6( $\text{CH}$ ), 144.4( $\text{C}$ ), 146.3( $\text{CH}$ ), 147.9( $\text{C}$ ).

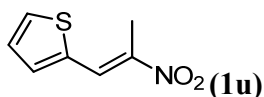

(E)-2-(2-nitroprop-1-en-1-yl)thiophene

$^1\text{H-NMR}$  ( $\text{CDCl}_3$ , 400 MHz)  $\delta$ : 2.56(s, 3H,  $\text{NO}_2\text{CCH}_3$ ), 7.19(dd,  $J_1=5.2\text{Hz}$ ,  $J_2=3.6\text{Hz}$ , 1H, aromatic *H*), 7.43(d,  $J=3.6\text{Hz}$ , 1H, aromatic *H*), 7.64(d,  $J=5.2\text{Hz}$ , 1H, aromatic *H*), 8.29(s, 1H,  $\text{CHCNO}_2$ );

$^{13}\text{C-NMR}$  ( $\text{CDCl}_3$ , 100 MHz)  $\delta$ : 14.2( $\text{CH}_3$ ), 127.2( $\text{CH}$ ), 128.2( $\text{CH}$ ), 131.7( $\text{CH}$ ), 134.7( $\text{CH}$ ), 135.3( $\text{C}$ ), 144.5( $\text{C}$ ).

## 4.2 Analytic data of $\alpha$ -chiral nitroalkanes

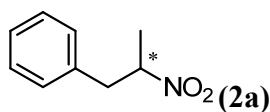

(2-nitropropyl)benzene

$[\alpha]_D^{25} = +44.8^\circ$  (C 0.4, CHCl<sub>3</sub>).

<sup>1</sup>H-NMR (CDCl<sub>3</sub>, 400 MHz)  $\delta$ : 1.52(d,  $J = 6.8$ Hz, 3H, CH<sub>3</sub>), 2.97~3.02(m, 1H, PhCH), 3.28~3.33(m, 1H, PhCH), 4.78(m, 1H, CHNO<sub>2</sub>), 7.13~7.16(m, 2H, aromatic H), 7.22~7.32(m, 3H, aromatic H).

<sup>13</sup>C-NMR (CDCl<sub>3</sub>, 100 MHz)  $\delta$ : 18.8(CH<sub>3</sub>), 41.2(CH<sub>2</sub>), 84.4(CH), 127.4(CH), 128.8(2  $\times$  CH), 129.0(2  $\times$  CH), 135.6(C).

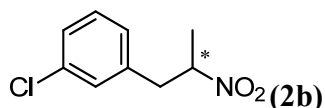

1-chloro-3-(2-nitropropyl)benzene

$[\alpha]_D^{25} = +64.2^\circ$  (C 0.5, CHCl<sub>3</sub>).

<sup>1</sup>H-NMR (CDCl<sub>3</sub>, 400 MHz)  $\delta$ : 1.55(d,  $J = 6.4$ Hz, 3H, CH<sub>3</sub>), 2.99(dd,  $J_1 = 14.1$ Hz,  $J_2 = 6.5$ Hz, 1H, PhCH), 3.29(dd,  $J_1 = 14.1$ Hz,  $J_2 = 7.6$ Hz, 1H, PhCH), 4.76 (m, 1H, CHNO<sub>2</sub>), 7.03~7.05(m, 1H, aromatic H), 7.17(s, 1H, aromatic H), 7.21~7.26(m, 2H, aromatic H).

<sup>13</sup>C-NMR (CDCl<sub>3</sub>, 100 MHz)  $\delta$ : 18.9(CH<sub>3</sub>), 40.6(CH<sub>2</sub>), 84.0(CH), 127.2(CH), 127.7(CH), 129.1(CH), 130.1(CH), 134.6(C), 137.5(C).

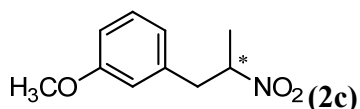

1-methoxy-3-(2-nitropropyl)benzene

$[\alpha]_D^{25} = +44.5^\circ$  (C 0.5, CHCl<sub>3</sub>).

<sup>1</sup>H-NMR (CDCl<sub>3</sub>, 400 MHz)  $\delta$ : 1.53 (d,  $J = 6.8$ Hz, 3H, CH<sub>3</sub>), 2.96(dd,  $J_1 = 14.0$ Hz,  $J_2 = 6.8$ Hz, 1H, PhCH), 3.29(dd,  $J_1 = 14.0$ Hz,  $J_2 = 7.6$ Hz, 1H, PhCH), 3.78(s, 3H, OCH<sub>3</sub>), 4.76(m, 1H, CHNO<sub>2</sub>), 6.69(d,  $J = 2.0$ Hz, 1H, aromatic H), 6.74(d,  $J = 8.0$ Hz, 1H, aromatic H), 6.79(dd,  $J_1 = 8.0$ Hz,  $J_2 = 2.0$ Hz, 1H, aromatic H), 7.22(dd,  $J_1 = J_2 = 8.0$ Hz, 1H, aromatic H);

$^{13}\text{C}$ -NMR ( $\text{CDCl}_3$ , 100 MHz)  $\delta$ : 18.8( $\text{CH}_3$ ), 41.2( $\text{CH}_2$ ), 55.2( $\text{CH}_3$ ), 84.3( $\text{CH}$ ), 112.7( $\text{CH}$ ), 114.8( $\text{CH}$ ), 121.3( $\text{CH}$ ), 129.8( $\text{C}$ ), 137.1( $\text{C}$ ), 159.9 ( $\text{C}$ ).

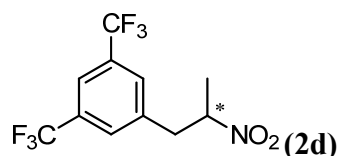

1-(2-nitropropyl)-3,5-bis(trifluoromethyl)benzene

$[\alpha]_{\text{D}}^{25} = +31.7^\circ$  (C 0.75,  $\text{CHCl}_3$ ).

$^1\text{H}$ -NMR ( $\text{CDCl}_3$ , 400 MHz)  $\delta$ : 1.63(d,  $J = 6.8\text{Hz}$ , 3H,  $\text{CH}_3$ ), 3.17(dd,  $J_1=14.4\text{Hz}, J_2=5.6\text{Hz}$ , 1H, Ph- $\text{CH}$ ), 3.46(dd,  $J_1=14.4\text{Hz}, J_2=8.4\text{Hz}$ , 1H, Ph- $\text{CH}$ ), 4.84(m, 1H,  $\text{CHNO}_2$ ), 7.64(s, 2H, aromatic  $H$ ), 7.81(s, 1H, aromatic  $H$ );

$^{13}\text{C}$ -NMR ( $\text{CDCl}_3$ , 100 MHz)  $\delta$ : 19.1( $\text{CH}_3$ ), 40.3( $\text{CH}_2$ ), 83.6( $\text{CH}$ ), 121.7(m,  $\text{CH}$ ), 123.1(q,  $J_{\text{CF}}=271\text{Hz}, 2 \times \text{CF}_3$ ), 129.2(m,  $2 \times \text{CH}$ ), 132.3(q,  $J_{\text{CF}}=33\text{Hz}, 2 \times \text{C}$ ), 138.1( $\text{C}$ ).

$^{19}\text{F}$ -NMR ( $\text{CDCl}_3$ , 376.5 MHz)  $\delta$ : -63.0.

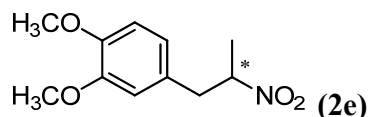

1,2-dimethoxy-4-(2-nitropropyl)benzene

$[\alpha]_{\text{D}}^{25} = +56.2^\circ$  (C 0.3,  $\text{CHCl}_3$ ).

$^1\text{H}$ -NMR ( $\text{CDCl}_3$ , 400 MHz)  $\delta$ : 1.54(d,  $J = 6.4\text{Hz}$ , 3H,  $\text{CH}_3$ ), 2.95(dd,  $J_1=14.0\text{Hz}, J_2=6.8\text{Hz}$ , 1H, Ph $\text{CH}$ ), 3.26(dd,  $J_1=14.0\text{Hz}, J_2=7.6\text{Hz}$ , 1H, Ph $\text{CH}$ ), 3.85(s, 3H,  $\text{OCH}_3$ ), 3.86(s, 3H,  $\text{OCH}_3$ ), 4.75(m, 1H,  $\text{CHNO}_2$ ), 6.66(d,  $J=2.0\text{Hz}$ , 1H, aromatic  $H$ ), 6.71(dd,  $J_1=8.0\text{Hz}, J_2=2.0\text{Hz}$ , 1H, aromatic  $H$ ), 6.80(d,  $J=8.0\text{Hz}$ , 1H, aromatic  $H$ ).

$^{13}\text{C}$ -NMR ( $\text{CDCl}_3$ , 100 MHz)  $\delta$ : 18.8( $\text{CH}_3$ ), 40.9( $\text{CH}_2$ ), 55.90( $\text{CH}_3$ ), 55.91( $\text{CH}_3$ ), 84.6( $\text{CH}$ ), 111.5( $\text{CH}$ ), 112.1( $\text{CH}$ ), 121.2( $\text{CH}$ ), 128.0( $\text{C}$ ), 148.5( $\text{C}$ ), 149.2 ( $\text{C}$ ).

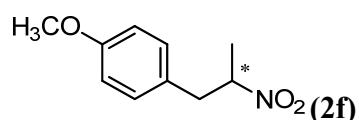

1-methoxy-4-(2-nitropropyl)benzene

$[\alpha]_D^{25} = +52.5^\circ$  (C 0.5,  $\text{CHCl}_3$ ).

$^1\text{H-NMR}$  ( $\text{CDCl}_3$ , 400 MHz)  $\delta$ : 1.53(d,  $J = 6.4\text{Hz}$ , 3H,  $\text{CH}_3$ ), 2.96(dd,  $J_1=14.0\text{Hz}, J_2=6.4\text{Hz}$ , 1H, PhCH), 3.26(dd,  $J_1=14.0\text{Hz}, J_2=7.2\text{Hz}$ , 1H, PhCH), 3.78(s, 3H,  $\text{OCH}_3$ ), 4.74(m, 1H,  $\text{CHNO}_2$ ), 6.85(d,  $J=8.4\text{Hz}$ , 2H, aromatic H), 7.07(d,  $J=8.4\text{Hz}$ , 2H, aromatic H).

$^{13}\text{C-NMR}$  ( $\text{CDCl}_3$ , 100 MHz)  $\delta$ : 18.7( $\text{CH}_3$ ), 40.4( $\text{CH}_2$ ), 55.2( $\text{CH}_3$ ), 84.6( $\text{CH}$ ), 114.2( $2 \times \text{CH}$ ), 130.1( $2 \times \text{CH}$ ), 127.5(C), 158.9(C).

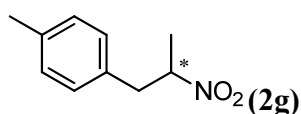

1-methyl-4-(2-nitropropyl)benzene

$[\alpha]_D^{25} = +20.6^\circ$  (C 0.45,  $\text{CHCl}_3$ ).

$^1\text{H-NMR}$  ( $\text{CDCl}_3$ , 400 MHz)  $\delta$ : 1.52(d,  $J = 6.4\text{Hz}$ , 3H,  $\text{CH}_3$ ), 2.31(s, 3H, Ph $\text{CH}_3$ ), 2.96(dd,  $J_1=14.0\text{Hz}, J_2=6.8\text{Hz}$ , 1H, PhCH), 3.27(dd,  $J_1=14.0\text{Hz}, J_2=7.2\text{Hz}$ , 1H, PhCH), 4.75 (m, 1H,  $\text{CHNO}_2$ ), 7.03(d,  $J=8.0\text{Hz}$ , 2H, aromatic H), 7.11(d,  $J=8.0\text{Hz}$ , 2H, aromatic H).

$^{13}\text{C-NMR}$  ( $\text{CDCl}_3$ , 100 MHz)  $\delta$ : 18.7( $\text{CH}_3$ ), 21.0( $\text{CH}_3$ ), 40.8( $\text{CH}_2$ ), 84.6( $\text{CH}$ ), 128.9( $2 \times \text{CH}$ ), 129.5 ( $2 \times \text{CH}$ ), 132.5(C), 137.1(C).

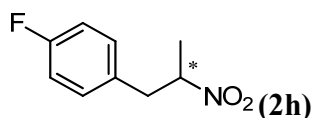

1-fluoro-4-(2-nitropropyl)benzene

$[\alpha]_D^{25} = +37.7^\circ$  (C 0.45,  $\text{CHCl}_3$ ).

$^1\text{H-NMR}$  ( $\text{CDCl}_3$ , 400 MHz)  $\delta$ : 1.55(d,  $J = 6.4\text{Hz}$ , 3H,  $\text{CH}_3$ ), 3.01(dd,  $J_1=14.0\text{Hz}, J_2=6.4\text{Hz}$ , 1H, PhCH), 3.28(dd,  $J_1=14.0\text{Hz}, J_2=8.0\text{Hz}$ , 1H, PhCH), 4.74(m, 1H,  $\text{CHNO}_2$ ), 6.98~7.03(m, 2H, aromatic H), 7.11~7.15(m, 2H, aromatic H).

$^{13}\text{C-NMR}$  ( $\text{CDCl}_3$ , 100 MHz)  $\delta$ : 18.8( $\text{CH}_3$ ), 40.3( $\text{CH}_2$ ), 84.4( $\text{CH}$ ), 115.7(d,  $J_{\text{CF}}=21\text{Hz}$ ,  $2 \times \text{CH}$ ), 130.5(d,  $J_{\text{CF}}=8\text{Hz}$ ,  $2 \times \text{CH}$ ), 131.2(d,  $J_{\text{CF}}=3\text{Hz}$ , C), 162.5(d,  $J_{\text{CF}}=245\text{Hz}$ , C).

$^{19}\text{F-NMR}$  ( $\text{CDCl}_3$ , 376.5 MHz)  $\delta$ : -115.0.

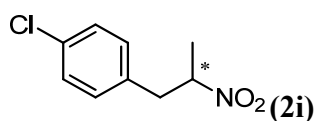

1-chloro-4-(2-nitropropyl)benzene

$[\alpha]_D^{25} = +57.4^\circ$  (C 0.5,  $\text{CHCl}_3$ ).

$^1\text{H-NMR}$  ( $\text{CDCl}_3$ , 400 MHz)  $\delta$ : 1.55(d,  $J = 6.8\text{Hz}$ , 3H,  $\text{CH}_3$ ), 2.99(dd,  $J_1 = 14.0\text{Hz}, J_2 = 6.4\text{Hz}$ , 1H, PhCH), 3.28(dd,  $J_1 = 14.0\text{Hz}, J_2 = 7.6\text{Hz}$ , 1H, PhCH), 4.74(m, 1H,  $\text{CHNO}_2$ ), 7.09(d,  $J_1 = 8.4\text{Hz}$ , 2H, aromatic H), 7.27~7.30(m, 2H, aromatic H).

$^{13}\text{C-NMR}$  ( $\text{CDCl}_3$ , 100 MHz)  $\delta$ : 18.8( $\text{CH}_3$ ), 40.4( $\text{CH}_2$ ), 84.2(CH), 129.0( $2 \times \text{CH}$ ), 130.3( $2 \times \text{CH}$ ), 133.5(C), 133.9(C).

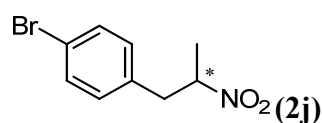

1-bromo-4-(2-nitropropyl)benzene

$[\alpha]_D^{25} = +87.2^\circ$  (C 0.6,  $\text{CHCl}_3$ ).

$^1\text{H-NMR}$  ( $\text{CDCl}_3$ , 400 MHz)  $\delta$ : 1.55(d,  $J = 7.2\text{Hz}$ , 3H,  $\text{CH}_3$ ), 2.98(dd,  $J_1 = 14.0\text{Hz}, J_2 = 6.4\text{Hz}$ , 1H, PhCH), 3.26(dd,  $J_1 = 14.0\text{Hz}, J_2 = 8.0\text{Hz}$ , 1H, PhCH), 4.75 (m, 1H,  $\text{CHNO}_2$ ), 7.03(d,  $J = 8.0\text{Hz}$ , 2H, aromatic H), 7.43(d,  $J = 8.0\text{Hz}$ , 2H, aromatic H).

$^{13}\text{C-NMR}$  ( $\text{CDCl}_3$ , 100 MHz)  $\delta$ : 18.8( $\text{CH}_3$ ), 40.5( $\text{CH}_2$ ), 84.1(CH), 121.5(C), 130.6 ( $2 \times \text{CH}$ ), 131.9 ( $2 \times \text{CH}$ ), 134.5(C).

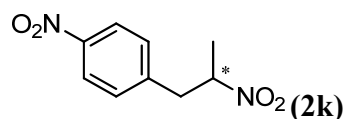

1-nitro-4-(2-nitropropyl)benzene

$[\alpha]_D^{25} = +30.5^\circ$  (C 0.27,  $\text{CHCl}_3$ ).

$^1\text{H-NMR}$  ( $\text{CDCl}_3$ , 400 MHz)  $\delta$ : 1.61(d,  $J = 6.4\text{Hz}$ , 3H,  $\text{CH}_3$ ), 3.15(dd,  $J_1 = 14.0\text{Hz}, J_2 = 6.0\text{Hz}$ , 1H, PhCH), 3.42(dd,  $J_1 = 14.0\text{Hz}, J_2 = 8.4\text{Hz}$ , 1H, PhCH), 4.84 (m, 1H,  $\text{CHNO}_2$ ), 7.35(d,  $J = 8.8\text{Hz}$ , 2H, aromatic H), 8.17(d,  $J = 8.8\text{Hz}$ , 2H, aromatic H).

$^{13}\text{C-NMR}$  ( $\text{CDCl}_3$ , 100 MHz)  $\delta$ : 19.1( $\text{CH}_3$ ), 40.6( $\text{CH}_2$ ), 83.7(CH), 124.1 ( $2 \times \text{CH}$ ), 129.9 ( $2 \times \text{CH}$ ), 142.9(C), 147.4(C).

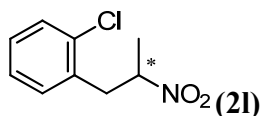

1-chloro-2-(2-nitropropyl)benzene

$[\alpha]_D^{25} = -8.1^\circ$  (C 0.1,  $\text{CHCl}_3$ ).

$^1\text{H-NMR}$  ( $\text{CDCl}_3$ , 400 MHz)  $\delta$ : 1.59(d,  $J = 6.8\text{Hz}$ , 3H,  $\text{CH}_3$ ), 3.19(dd,  $J_1 = 14.0\text{Hz}, J_2 = 6.0\text{Hz}$ , 1H, PhCH), 3.40(dd,  $J_1 = 14.0\text{Hz}, J_2 = 7.6\text{Hz}$ , 1H, PhCH), 4.92 (m, 1H,  $\text{CHNO}_2$ ), 7.16~7.25(m, 3H, aromatic H), 7.37~7.39(m, 1H, aromatic H).

$^{13}\text{C-NMR}$  ( $\text{CDCl}_3$ , 100 MHz)  $\delta$ : 19.1( $\text{CH}_3$ ), 38.9( $\text{CH}_2$ ), 82.7( $\text{CH}$ ), 127.2( $\text{CH}$ ), 129.1( $\text{CH}$ ), 129.8( $\text{CH}$ ), 131.4( $\text{CH}$ ), 133.5(C), 134.1(C).

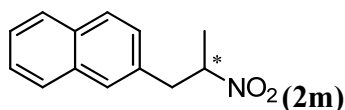

2-(2-nitropropyl)naphthalene

$[\alpha]_D^{25} = +51.6^\circ$  (C 0.5,  $\text{CHCl}_3$ ).

$^1\text{H-NMR}$  ( $\text{CDCl}_3$ , 400 MHz)  $\delta$ : 1.56 (d,  $J = 6.8\text{Hz}$ , 3H,  $\text{CH}_3$ ), 3.15(dd,  $J_1 = 14.0\text{Hz}, J_2 = 6.8\text{Hz}$ , 1H, PhCH), 3.48(dd,  $J_1 = 14.0\text{Hz}, J_2 = 7.6\text{Hz}$ , 1H, PhCH), 4.86(m, 1H,  $\text{CHNO}_2$ ), 7.27(dd,  $J_1 = 8.4\text{Hz}, J_2 = 1.6\text{Hz}$ , 1H, aromatic H), 7.44~7.49(m, 2H, aromatic H), 7.61(s, 1H, aromatic H), 7.77~7.82(m, 3H, aromatic H);

$^{13}\text{C-NMR}$  ( $\text{CDCl}_3$ , 100 MHz)  $\delta$ : 18.9( $\text{CH}_3$ ), 41.3( $\text{CH}_2$ ), 84.4( $\text{CH}$ ), 126.1( $\text{CH}$ ), 126.4( $\text{CH}$ ), 126.8( $\text{CH}$ ), 127.6( $\text{CH}$ ), 127.7( $\text{CH}$ ), 127.9( $\text{CH}$ ), 128.6( $\text{CH}$ ), 132.6(C), 132.9(C), 133.5(C).

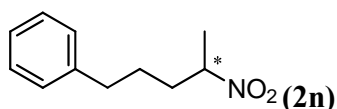

(4-nitropentyl)benzene

$[\alpha]_D^{25} = +20.8^\circ$  (C 0.22,  $\text{CHCl}_3$ ).

$^1\text{H-NMR}$  ( $\text{CDCl}_3$ , 400 MHz)  $\delta$ : 1.50(d,  $J = 6.8\text{Hz}$ , 3H,  $\text{CH}_3$ ), 1.62~1.69(m, 2H,  $\text{PhCH}_2\text{CH}_2$ ), 1.75(m, 1H,  $\text{PhCH}_2\text{CH}_2\text{CH}$ ), 2.02(m, 1H,  $\text{PhCH}_2\text{CH}_2\text{CH}$ ), 2.64(t,  $J = 7.6\text{Hz}$ ,  $\text{PhCH}_2$ ), 4.56(m, 1H,  $\text{CHNO}_2$ ), 7.13~7.21(m, 3H, aromatic H), 7.26~7.29(m, 2H, aromatic H);



$^{13}\text{C}$ -NMR ( $\text{CDCl}_3$ , 100 MHz)  $\delta$ : 19.2( $\text{CH}_3$ ), 27.3( $\text{CH}_2$ ), 34.6( $\text{CH}_2$ ), 35.1( $\text{CH}_2$ ), 83.4( $\text{CH}$ ), 126.1( $\text{CH}$ ), 128.3( $2 \times \text{CH}$ ), 128.5( $2 \times \text{CH}$ ), 141.1( $\text{C}$ ).

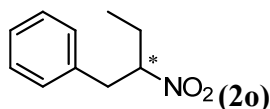

(2-nitrobutyl)benzene

$[\alpha]_{\text{D}}^{25} = +24.5^\circ$  (C 0.22,  $\text{CHCl}_3$ ).

$^1\text{H}$ -NMR ( $\text{CDCl}_3$ , 400 MHz)  $\delta$ : 0.91(t,  $J = 7.2\text{Hz}$ , 3H,  $\text{CH}_3$ ), 1.76(m, 1H,  $\text{CH}_3\text{CH}$ ), 1.95(m, 1H,  $\text{CH}_3\text{CH}$ ), 2.95(dd,  $J_1 = 14.0\text{Hz}$ ,  $J_2 = 6.0\text{Hz}$ , 1H, Ph- $\text{CH}$ ), 3.18(dd,  $J_1 = 14.0\text{Hz}$ ,  $J_2 = 8.4\text{Hz}$ , 1H, Ph- $\text{CH}$ ), 4.55(m, 1H,  $\text{CHNO}_2$ ), 7.07~7.09(m, 2H, aromatic  $H$ ), 7.15~7.25(m, 3H, aromatic  $H$ );

$^{13}\text{C}$ -NMR ( $\text{CDCl}_3$ , 100 MHz)  $\delta$ : 10.2( $\text{CH}_3$ ), 26.8( $\text{CH}_2$ ), 39.7( $\text{CH}_2$ ), 91.4( $\text{CH}$ ), 127.4( $\text{CH}$ ), 128.8( $2 \times \text{CH}$ ), 128.9( $2 \times \text{CH}$ ), 134.7( $\text{C}$ ).

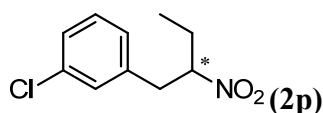

1-chloro-3-(2-nitrobutyl)benzene

$[\alpha]_{\text{D}}^{25} = +84.1^\circ$  (C 0.6,  $\text{CHCl}_3$ ).

$^1\text{H}$ -NMR ( $\text{CDCl}_3$ , 400 MHz)  $\delta$ : 0.99(t,  $J = 6.8\text{Hz}$ , 3H,  $\text{CH}_3$ ), 1.84(m, 1H,  $\text{CH}_3\text{CH}$ ), 2.02(m, 1H,  $\text{CH}_3\text{CH}$ ), 2.99(dd,  $J_1 = 14.0\text{Hz}$ ,  $J_2 = 5.6\text{Hz}$ , 1H, Ph- $\text{CH}$ ), 3.23(dd,  $J_1 = 14.0\text{Hz}$ ,  $J_2 = 8.8\text{Hz}$ , 1H, Ph- $\text{CH}$ ), 4.62(m, 1H,  $\text{CHNO}_2$ ), 7.02~7.05(m, 1H, aromatic  $H$ ), 7.16(s, 1H, aromatic  $H$ ), 7.22~7.25(m, 2H, aromatic  $H$ );

$^{13}\text{C}$ -NMR ( $\text{CDCl}_3$ , 100 MHz)  $\delta$ : 10.2( $\text{CH}_3$ ), 26.9( $\text{CH}_2$ ), 39.2( $\text{CH}_2$ ), 90.9( $\text{CH}$ ), 127.1( $\text{CH}$ ), 127.7( $\text{CH}$ ), 129.0( $\text{CH}$ ), 130.1( $\text{CH}$ ), 134.6( $\text{C}$ ), 137.7( $\text{C}$ ).

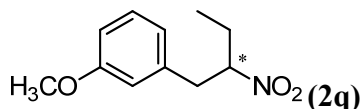

1-methoxy-3-(2-nitrobutyl)benzene

$[\alpha]_{\text{D}}^{25} = +47.6^\circ$  (C 0.5,  $\text{CHCl}_3$ ).

$^1\text{H-NMR}$  ( $\text{CDCl}_3$ , 400 MHz)  $\delta$ : 0.92(t,  $J=7.2\text{Hz}$ , 3H,  $\text{CH}_3$ ), 1.74(m, 1H,  $\text{CH}_3\text{CH}$ ), 1.94(m, 1H,  $\text{CH}_3\text{CH}$ ), 2.92(dd,  $J_1=14.0\text{Hz}$ ,  $J_2=6.0\text{Hz}$ , 1H, Ph- $\text{CH}$ ), 3.17(dd,  $J_1=14.0\text{Hz}$ ,  $J_2=8.4\text{Hz}$ , 1H, Ph- $\text{CH}$ ), 3.71(s, 3H,  $\text{OCH}_3$ ), 4.56(m, 1H,  $\text{CHNO}_2$ ), 6.62(dd,  $J_1=J_2=2.0\text{Hz}$ , 1H, aromatic  $H$ ), 6.66(dd,  $J=7.6\text{Hz}$ ,  $J_2=2.0\text{Hz}$ , 1H, aromatic  $H$ ), 6.72(dd,  $J_1=8.0\text{Hz}$ ,  $J_2=2.0\text{Hz}$ , 1H, aromatic  $H$ ), 7.14(dd,  $J_1=8.0\text{Hz}$ ,  $J_2=7.6\text{Hz}$ , 1H, aromatic  $H$ );

$^{13}\text{C-NMR}$  ( $\text{CDCl}_3$ , 100 MHz)  $\delta$ : 10.2( $\text{CH}_3$ ), 26.8( $\text{CH}_2$ ), 39.7( $\text{CH}_2$ ), 55.2( $\text{OCH}_3$ ), 91.2( $\text{CH}$ ), 112.6( $\text{CH}$ ), 114.7( $\text{CH}$ ), 121.1( $\text{CH}$ ), 129.8( $\text{CH}$ ), 137.2( $\text{C}$ ), 159.9( $\text{C}$ ).

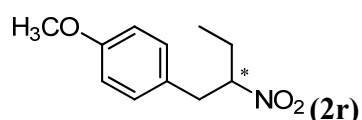

1-methoxy-4-(2-nitrobutyl)benzene

$[\alpha]_{\text{D}}^{25} = +31.7^\circ$  (C 0.5,  $\text{CHCl}_3$ ).

$^1\text{H-NMR}$  ( $\text{CDCl}_3$ , 400 MHz)  $\delta$ : 0.99(t,  $J=7.2\text{Hz}$ , 3H,  $\text{CH}_3$ ), 1.81(m, 1H,  $\text{CH}_3\text{CH}$ ), 2.02(m, 1H,  $\text{CH}_3\text{CH}$ ), 2.97(dd,  $J_1=14.4\text{Hz}$ ,  $J_2=5.6\text{Hz}$ , 1H, Ph- $\text{CH}$ ), 3.19(dd,  $J_1=14.4\text{Hz}$ ,  $J_2=8.4\text{Hz}$ , 1H, Ph- $\text{CH}$ ), 3.78(s, 3H,  $\text{OCH}_3$ ), 4.59(m, 1H,  $\text{CHNO}_2$ ), 6.84(d,  $J=8.4\text{Hz}$ , 2H, aromatic  $H$ ), 7.07(d,  $J=8.4\text{Hz}$ , 2H, aromatic  $H$ );

$^{13}\text{C-NMR}$  ( $\text{CDCl}_3$ , 100 MHz)  $\delta$ : 10.2( $\text{CH}_3$ ), 26.7( $\text{CH}_2$ ), 38.9( $\text{CH}_2$ ), 55.2( $\text{OCH}_3$ ), 91.6( $\text{CH}$ ), 114.2( $2 \times \text{CH}$ ), 129.9( $2 \times \text{CH}$ ), 127.7( $\text{C}$ ), 158.9( $\text{C}$ ).

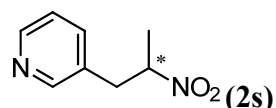

3-(2-nitropropyl)pyridine

$[\alpha]_{\text{D}}^{25} = -5.4^\circ$  (C 0.1,  $\text{CHCl}_3$ ).

$^1\text{H-NMR}$  ( $\text{CDCl}_3$ , 400 MHz)  $\delta$ : 1.64(d,  $J=6.8\text{Hz}$ , 3H,  $\text{CH}_3$ ), 3.14(dd,  $J_1=14.4\text{Hz}$ ,  $J_2=5.2\text{Hz}$ , 1H, Pyridyl- $\text{CH}$ ), 3.48(dd,  $J_1=14.4\text{Hz}$ ,  $J_2=8.8\text{Hz}$ , 1H, Pyridyl- $\text{CH}$ ), 4.82(m, 1H,  $\text{CHNO}_2$ ), 7.49(dd,  $J_1=8.0\text{Hz}$ ,  $J_2=5.6\text{Hz}$ , 1H, aromatic  $H$ ), 7.75(d,  $J=8.0\text{Hz}$ , 1H, aromatic  $H$ ), 8.50(s, 1H, aromatic  $H$ ), 8.53(d,  $J=5.6\text{Hz}$ , 1H, aromatic  $H$ );

$^{13}\text{C-NMR}$  ( $\text{CDCl}_3$ , 100 MHz)  $\delta$ : 19.2( $\text{CH}_3$ ), 37.5( $\text{CH}_2$ ), 83.2( $\text{CH}$ ), 125.5( $\text{CH}$ ), 133.9( $\text{C}$ ), 139.6( $\text{CH}$ ), 146.6( $\text{CH}$ ), 147.8( $\text{CH}$ ).

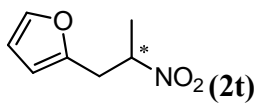

2-(2-nitropropyl)furan

$[\alpha]_D^{25} = +61.8^\circ$  (C 0.4, CHCl<sub>3</sub>).

<sup>1</sup>H-NMR (CDCl<sub>3</sub>, 400 MHz)  $\delta$ : 1.57(d,  $J = 6.4$ Hz, 3H, CH<sub>3</sub>), 3.08(dd,  $J_1 = 15.2$ Hz,  $J_2 = 6.8$ Hz, 1H, Furyl-CH), 3.48(dd,  $J_1 = 15.2$ Hz,  $J_2 = 7.2$ Hz, 1H, Furyl-CH), 4.85(m, 1H, CHNO<sub>2</sub>), 6.12(d,  $J = 3.2$ Hz, 1H, aromatic H), 6.29(dd,  $J_1 = 3.2$ Hz,  $J_2 = 1.6$ Hz, 1H, aromatic H), 7.34(d,  $J = 1.6$ Hz, 1H, aromatic H);

<sup>13</sup>C-NMR (CDCl<sub>3</sub>, 100 MHz)  $\delta$ : 18.8(CH<sub>3</sub>), 33.4(CH<sub>2</sub>), 81.8(CH), 108.0(CH), 110.5(CH), 142.3(CH), 149.4(C).

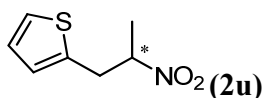

2-(2-nitropropyl)thiophene

$[\alpha]_D^{25} = +79.6^\circ$  (C 0.42, CHCl<sub>3</sub>).

<sup>1</sup>H-NMR (CDCl<sub>3</sub>, 400 MHz)  $\delta$ : 1.59(d,  $J = 6.4$ Hz, 3H, CH<sub>3</sub>), 3.25(dd,  $J_1 = 15.2$ Hz,  $J_2 = 6.4$ Hz, 1H, Thieryl-CH), 3.54(dd,  $J_1 = 15.2$ Hz,  $J_2 = 7.6$ Hz, 1H, Thieryl-CH), 4.85(m, 1H, CHNO<sub>2</sub>), 6.85(dd,  $J_1 = 3.2$ Hz,  $J_2 = 0.8$ Hz, 1H, aromatic H), 6.94(dd,  $J_1 = 5.6$ Hz,  $J_2 = 3.2$ Hz, 1H, aromatic H), 7.20(dd,  $J_1 = 5.6$ Hz,  $J_2 = 0.8$ Hz, 1H, aromatic H);

<sup>13</sup>C-NMR (CDCl<sub>3</sub>, 100 MHz)  $\delta$ : 18.7(CH<sub>3</sub>), 35.0(CH<sub>2</sub>), 84.2(CH), 125.0(CH), 126.8(CH), 127.2(CH), 137.1(C).

## 5 References

- [1] (a) A. Fryszkowska, K. Fisher, J. M. Gardiner and G. M. Stephens, *J. Org. Chem.*, 2008, 73, 4295–4298; (b) Y. Kawai, Y. Inab and N. Tokitoh, *Tetrahedron: Asymmetry*, 2001, 12, 309–318.
- [2] A. Bhattacharjya, R. Mukhopadhyay and S. C. Pakrashi, *Synthesis*, 1985, 886–887.
- [3] (a) S. Li, K. Huang, B. Cao, J. Zhang, W. Wu and X. Zhang, *Angew. Chem. Int. Ed.*, 2012, 51, 8573–8576; (b) S. Li, K. Huang, J. Zhang, W. Wu and X. Zhang, *Chem. Eur. J.*, 2013, 19, 10840–10844.
- [4] (a) J. Xiang, E.-X. Sun, C.-X. Lian, W.-C. Yuan, J. Zhu, Q. Wang and J. Deng, *Tetrahedron*, 2012, 68, 4609–4620; (b) E. Burda, T. Reiß, T. Winkler, C. Giese, X. Kostrov, T. Huber, W. Hummel and H. Gröger, *Angew. Chem. Int. Ed.*, 2013, 52, 9323–9326; (c) R. R. Bak, A. F. McAnda, A. J. Smallridge and M. A. Trewhella, *Australian Journal of Chemistry*, 1996, 49, 1257–1260; (d) Y. Yanto, C. K. Winkler, S. Lohr, M. Hall, K. Faber and A. S. Bommarius, *Org. Lett.*, 2011, 13, 2540–2543.

## 6 Representative HPLC traces

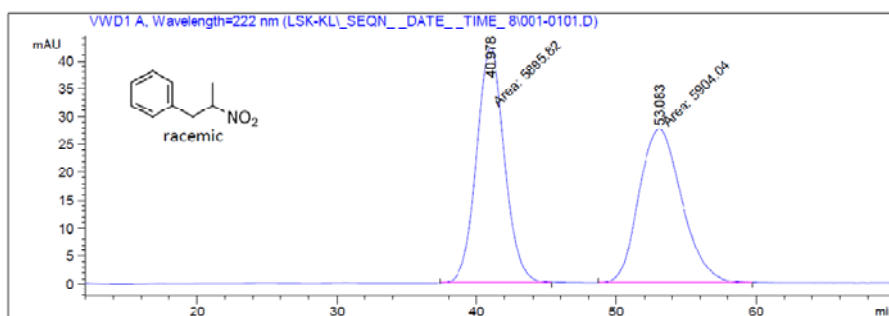

=====  
 Area Percent Report  
 =====

Sorted By : Signal  
 Multiplier : 1.0000  
 Dilution : 1.0000  
 Use Multiplier & Dilution Factor with ISTDs

Signal 1: VWD1 A, Wavelength=222 nm

| Peak # | RetTime [min] | Type | Width [min] | Area mAU   | Height [mAU] | Area %  |
|--------|---------------|------|-------------|------------|--------------|---------|
| 1      | 40.978        | MM   | 2.3364      | 5895.81641 | 42.05685     | 49.9651 |
| 2      | 53.083        | MM   | 3.5690      | 5904.04248 | 27.57126     | 50.0349 |

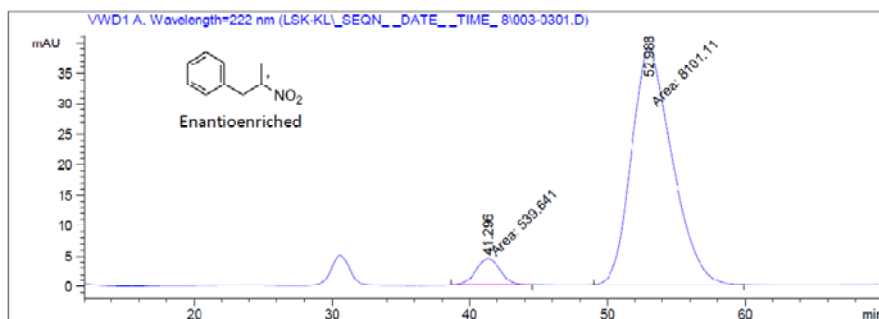

=====  
 Area Percent Report  
 =====

Sorted By : Signal  
 Multiplier : 1.0000  
 Dilution : 1.0000  
 Use Multiplier & Dilution Factor with ISTDs

Signal 1: VWD1 A, Wavelength=222 nm

| Peak # | RetTime [min] | Type | Width [min] | Area mAU   | Height [mAU] | Area %  |
|--------|---------------|------|-------------|------------|--------------|---------|
| 1      | 41.296        | MM   | 2.0825      | 539.64117  | 4.31888      | 6.2453  |
| 2      | 52.988        | MM   | 3.4493      | 8101.11377 | 39.14381     | 93.7547 |

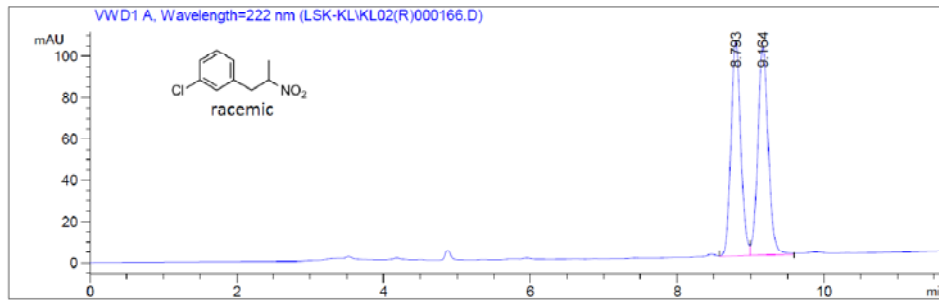

=====  
Area Percent Report  
=====

Sorted By : Signal  
Multiplier : 1.0000  
Dilution : 1.0000  
Use Multiplier & Dilution Factor with ISTDs

Signal 1: VWD1 A, Wavelength=222 nm

| Peak # | RetTime [min] | Type | Width [min] | Area mAU   | Height [mAU] | Area %  |
|--------|---------------|------|-------------|------------|--------------|---------|
| 1      | 8.793         | VV   | 0.1437      | 965.58356  | 103.55462    | 49.0421 |
| 2      | 9.164         | VB   | 0.1524      | 1003.30518 | 100.87052    | 50.9579 |

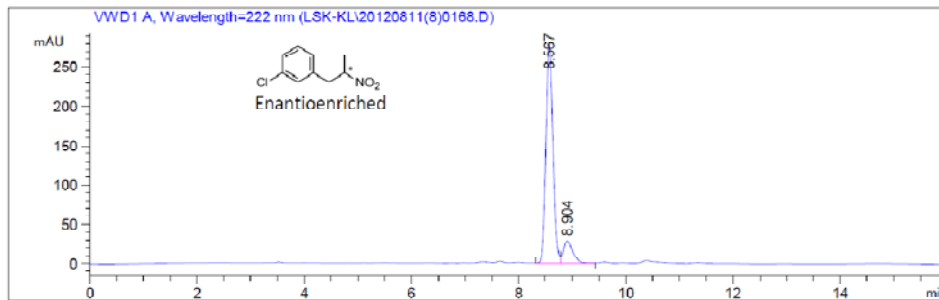

=====  
Area Percent Report  
=====

Sorted By : Signal  
Multiplier : 1.0000  
Dilution : 1.0000  
Use Multiplier & Dilution Factor with ISTDs

Signal 1: VWD1 A, Wavelength=222 nm

| Peak # | RetTime [min] | Type | Width [min] | Area mAU   | Height [mAU] | Area %  |
|--------|---------------|------|-------------|------------|--------------|---------|
| 1      | 8.567         | VV   | 0.1437      | 2566.23975 | 279.01001    | 87.4688 |
| 2      | 8.904         | VV   | 0.1793      | 367.65329  | 29.40752     | 12.5312 |

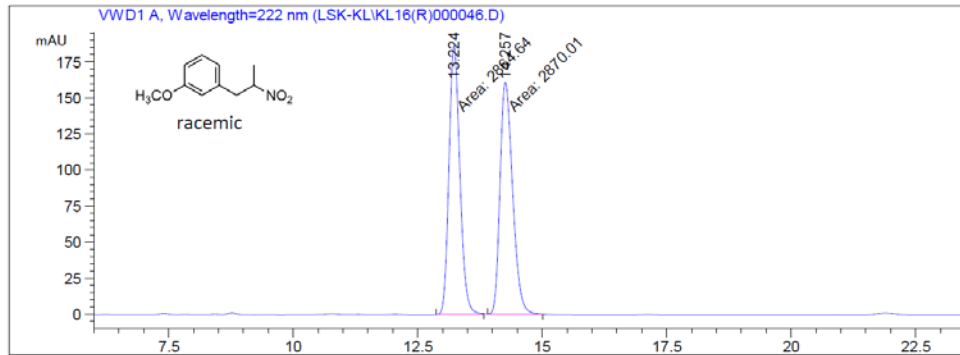

=====  
Area Percent Report  
=====

Sorted By : Signal  
Multiplier : 1.0000  
Dilution : 1.0000  
Use Multiplier & Dilution Factor with ISTDs

Signal 1: VWD1 A, Wavelength=222 nm

| Peak # | RetTime [min] | Type | Width [min] | Area mAU   | Area *s   | Height [mAU] | Area % |
|--------|---------------|------|-------------|------------|-----------|--------------|--------|
| 1      | 13.224        | MM   | 0.2556      | 2864.64380 | 186.77107 | 49.9532      |        |
| 2      | 14.257        | MM   | 0.2960      | 2870.01074 | 161.58247 | 50.0468      |        |

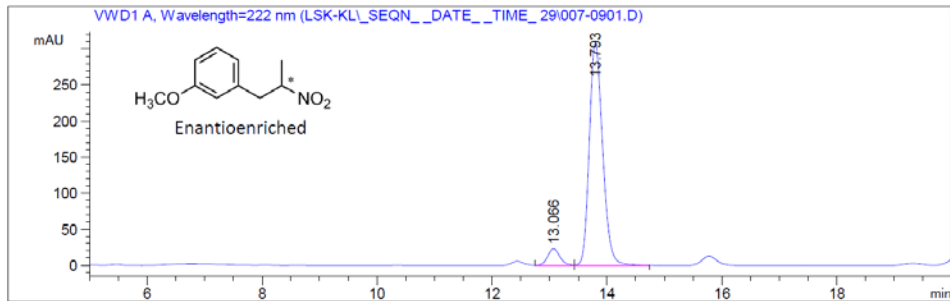

=====  
Area Percent Report  
=====

Sorted By : Signal  
Multiplier : 1.0000  
Dilution : 1.0000  
Use Multiplier & Dilution Factor with ISTDs

Signal 1: VWD1 A, Wavelength=222 nm

| Peak # | RetTime [min] | Type | Width [min] | Area mAU   | Area *s   | Height [mAU] | Area % |
|--------|---------------|------|-------------|------------|-----------|--------------|--------|
| 1      | 13.066        | VV   | 0.2231      | 333.04150  | 22.96572  | 6.3028       |        |
| 2      | 13.793        | VB   | 0.2501      | 4950.98584 | 308.06375 | 93.6972      |        |

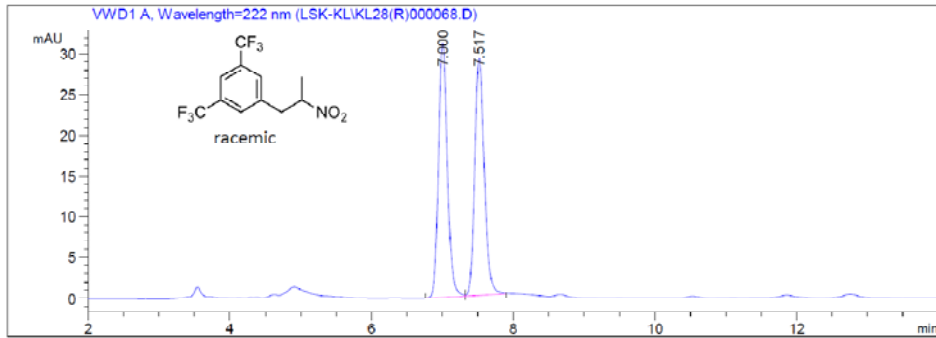

=====  
 Area Percent Report  
 =====

Sorted By : Signal  
 Multiplier : 1.0000  
 Dilution : 1.0000  
 Use Multiplier & Dilution Factor with ISTDs

Signal 1: VWD1 A, Wavelength=222 nm

| Peak # | RetTime [min] | Type | Width [min] | Area mAU  | Height [mAU] | Area %  |
|--------|---------------|------|-------------|-----------|--------------|---------|
| 1      | 7.000         | BV   | 0.1337      | 271.79367 | 31.20340     | 50.0781 |
| 2      | 7.517         | VB   | 0.1434      | 270.94540 | 29.15437     | 49.9219 |

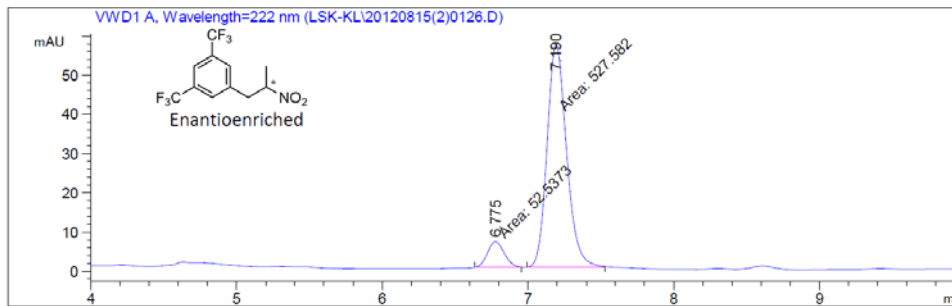

=====  
 Area Percent Report  
 =====

Sorted By : Signal  
 Multiplier : 1.0000  
 Dilution : 1.0000  
 Use Multiplier & Dilution Factor with ISTDs

Signal 1: VWD1 A, Wavelength=222 nm

| Peak # | RetTime [min] | Type | Width [min] | Area mAU  | Height [mAU] | Area %  |
|--------|---------------|------|-------------|-----------|--------------|---------|
| 1      | 6.775         | MM   | 0.1329      | 52.53727  | 6.58839      | 9.0563  |
| 2      | 7.190         | MM   | 0.1549      | 527.58179 | 56.75214     | 90.9437 |



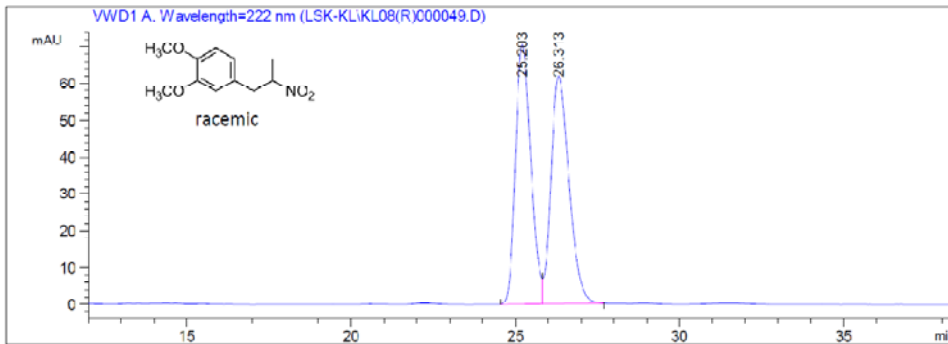

-----  
 Area Percent Report  
 -----

Sorted By : Signal  
 Multiplier : 1.0000  
 Dilution : 1.0000  
 Use Multiplier & Dilution Factor with ISTDs

Signal 1: VWD1 A, Wavelength=222 nm

| Peak # | RetTime [min] | Type | Width [min] | Area mAU *s | Height [mAU] | Area %  |
|--------|---------------|------|-------------|-------------|--------------|---------|
| 1      | 25.203        | BV   | 0.5101      | 2308.92651  | 70.51905     | 49.2855 |
| 2      | 26.313        | VB   | 0.5918      | 2375.86816  | 61.91747     | 50.7145 |

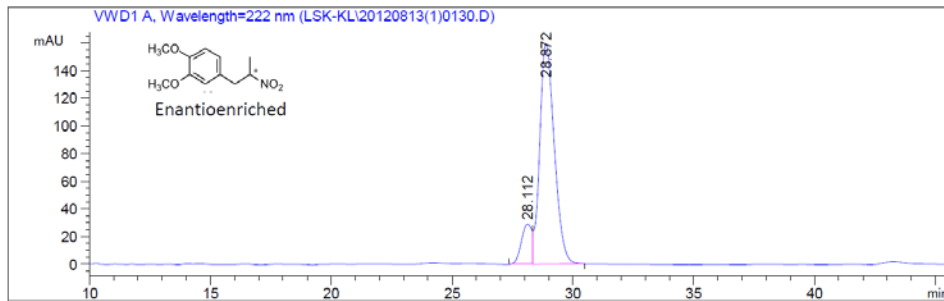

-----  
 Area Percent Report  
 -----

Sorted By : Signal  
 Multiplier : 1.0000  
 Dilution : 1.0000  
 Use Multiplier & Dilution Factor with ISTDs

Signal 1: VWD1 A, Wavelength=222 nm

| Peak # | RetTime [min] | Type | Width [min] | Area mAU *s | Height [mAU] | Area %  |
|--------|---------------|------|-------------|-------------|--------------|---------|
| 1      | 28.112        | BV   | 0.4649      | 875.57520   | 29.07660     | 11.5820 |
| 2      | 28.872        | VB   | 0.6447      | 6684.24219  | 159.51347    | 88.4180 |

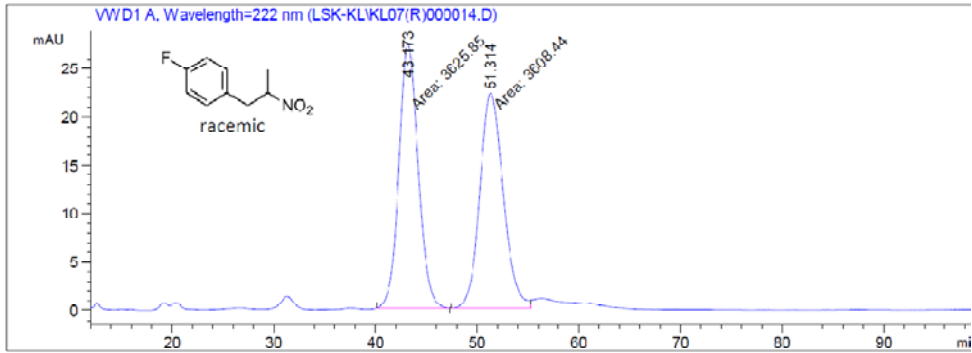

=====  
Area Percent Report  
=====

Sorted By : Signal  
Multiplier : 1.0000  
Dilution : 1.0000  
Use Multiplier & Dilution Factor with ISTDs

Signal 1: VWD1 A, Wavelength=222 nm

| Peak # | RetTime [min] | Type | Width [min] | Area mAU   | Height [mAU] | Area %  |
|--------|---------------|------|-------------|------------|--------------|---------|
| 1      | 43.173        | MM   | 2.2105      | 3625.85449 | 27.33820     | 50.1204 |
| 2      | 51.314        | MM   | 2.7046      | 3608.44141 | 22.23676     | 49.8796 |

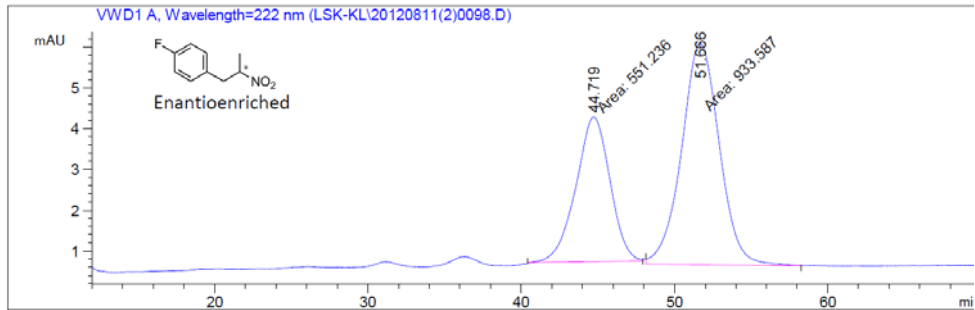

=====  
Area Percent Report  
=====

Sorted By : Signal  
Multiplier : 1.0000  
Dilution : 1.0000  
Use Multiplier & Dilution Factor with ISTDs

Signal 1: VWD1 A, Wavelength=222 nm

| Peak # | RetTime [min] | Type | Width [min] | Area mAU  | Height [mAU] | Area %  |
|--------|---------------|------|-------------|-----------|--------------|---------|
| 1      | 44.719        | MM   | 2.5830      | 551.23560 | 3.55684      | 37.1247 |
| 2      | 51.666        | MM   | 2.8643      | 933.58698 | 5.43223      | 62.8753 |

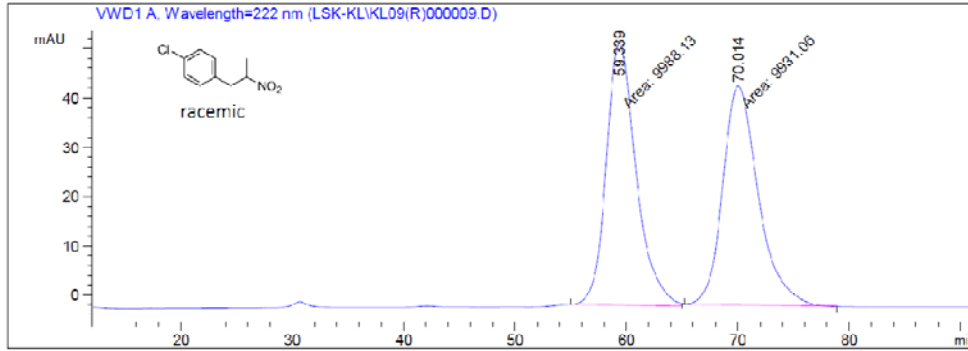

Area Percent Report

Sorted By : Signal  
Multiplier : 1.0000  
Dilution : 1.0000  
Use Multiplier & Dilution Factor with ISTDs

Signal 1: VWD1 A, Wavelength=222 nm

| Peak # | RetTime [min] | Type | Width [min] | Area mAU*s | Height [mAU] | Area %  |
|--------|---------------|------|-------------|------------|--------------|---------|
| 1      | 59.339        | MM   | 3.1346      | 9980.13104 | 53.10644     | 50.1433 |
| 2      | 70.014        | MM   | 3.7303      | 9931.05957 | 44.37114     | 49.8567 |

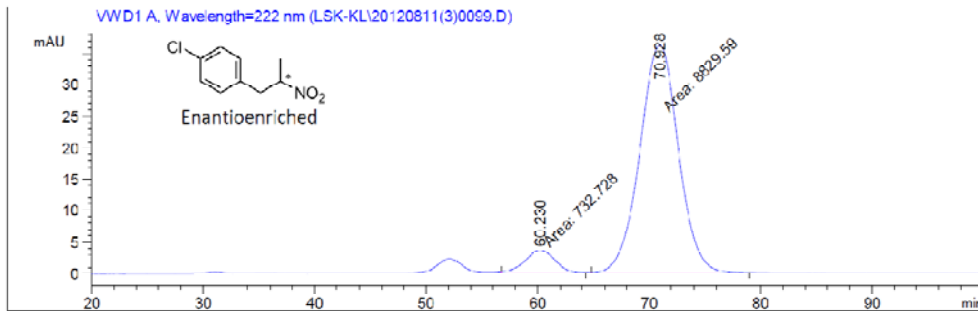

Area Percent Report

Sorted By : Signal  
Multiplier : 1.0000  
Dilution : 1.0000  
Use Multiplier & Dilution Factor with ISTDs

Signal 1: VWD1 A, Wavelength=222 nm

| Peak # | RetTime [min] | Type | Width [min] | Area mAU*s | Height [mAU] | Area %  |
|--------|---------------|------|-------------|------------|--------------|---------|
| 1      | 60.230        | MM   | 3.3304      | 732.72821  | 3.66685      | 7.6627  |
| 2      | 70.928        | MM   | 4.0432      | 8829.58887 | 36.39711     | 92.3373 |

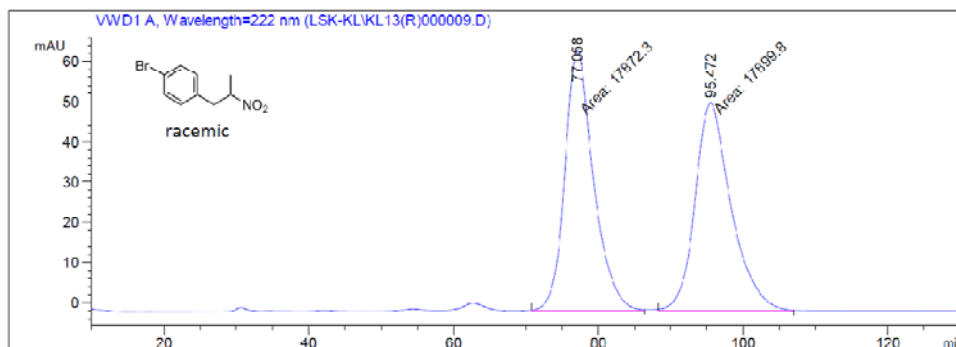

Area Percent Report

Sorted By : Signal  
Multiplier : 1.0000  
Dilution : 1.0000  
Use Multiplier & Dilution Factor with TSTDs

Signal 1: VWD1 A, Wavelength=222 nm

| Peak # | RetTime [min] | Type | Width [min] | Area mAU  | Height [mAU] | Area %  |
|--------|---------------|------|-------------|-----------|--------------|---------|
| 1      | 77.058        | MM   | 4.5957      | 1.78723e4 | 64.81572     | 49.9615 |
| 2      | 95.472        | MM   | 5.7768      | 1.78998e4 | 51.64314     | 50.0385 |

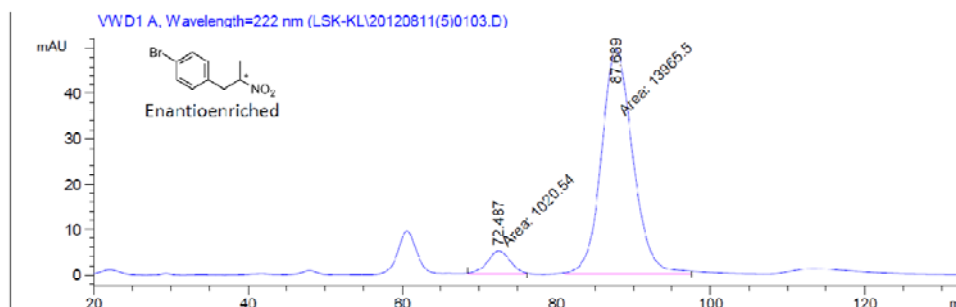

Area Percent Report

Sorted By : Signal  
Multiplier : 1.0000  
Dilution : 1.0000  
Use Multiplier & Dilution Factor with ISTDs

Signal 1: VWD1 A, Wavelength=222 nm

| Peak # | RetTime [min] | Type | Width [min] | Area mAU   | Height [mAU] | Area %  |
|--------|---------------|------|-------------|------------|--------------|---------|
| 1      | 72.487        | MM   | 3.3687      | 1020.53760 | 5.04909      | 6.8099  |
| 2      | 87.689        | MM   | 4.7021      | 1.38655e4  | 49.50137     | 93.1901 |

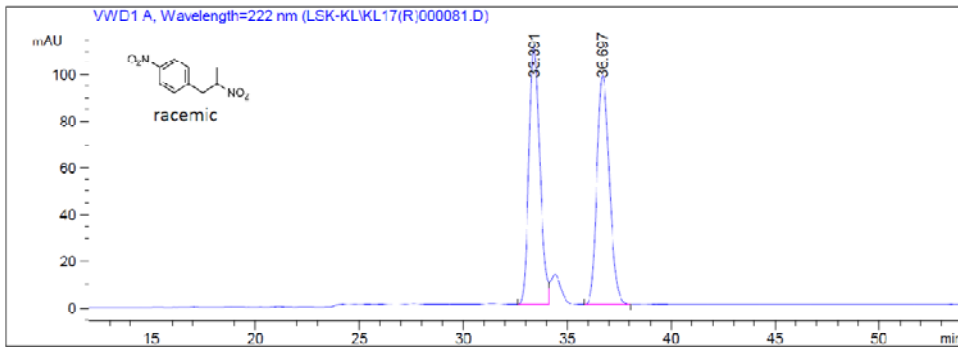

=====  
 Area Percent Report  
 =====

Sorted By : Signal  
 Multiplier : 1.0000  
 Dilution : 1.0000  
 Use Multiplier & Dilution Factor with ISTDs

Signal 1: VWD1 A, Wavelength=222 nm

| Peak # | RetTime [min] | Type | Width [min] | Area mAU   | Area %  | Height [mAU] |
|--------|---------------|------|-------------|------------|---------|--------------|
| 1      | 33.391        | BV   | 0.5761      | 4102.07129 | 49.9969 | 111.15654    |
| 2      | 36.697        | BB   | 0.6533      | 4102.57061 | 50.0031 | 98.21953     |

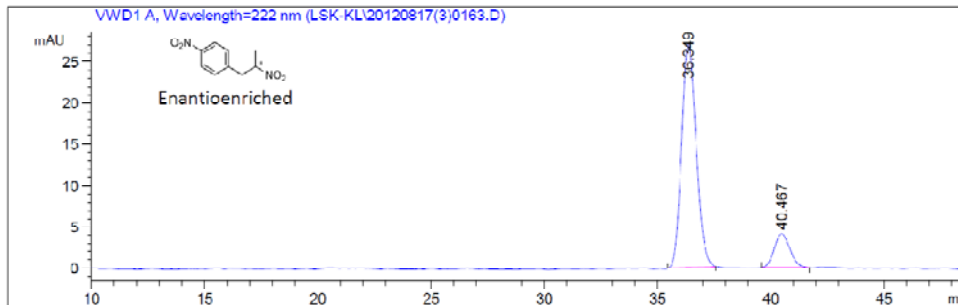

=====  
 Area Percent Report  
 =====

Sorted By : Signal  
 Multiplier : 1.0000  
 Dilution : 1.0000  
 Use Multiplier & Dilution Factor with ISTDs

Signal 1: VWD1 A, Wavelength=222 nm

| Peak # | RetTime [min] | Type | Width [min] | Area mAU   | Area %  | Height [mAU] |
|--------|---------------|------|-------------|------------|---------|--------------|
| 1      | 36.349        | BB   | 0.7021      | 1219.45569 | 85.7866 | 27.12606     |
| 2      | 40.467        | BB   | 0.7230      | 202.04327  | 14.2134 | 4.15597      |

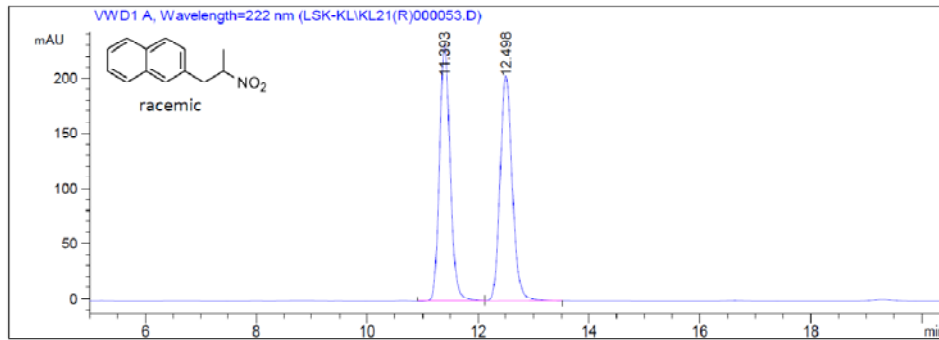

=====  
 Area Percent Report  
 =====

Sorted By : Signal  
 Multiplier : 1.0000  
 Dilution : 1.0000  
 Use Multiplier & Dilution Factor with ISTDs

Signal 1: VWD1 A, Wavelength=222 nm

| Peak # | RetTime [min] | Type | Width [min] | Area mAU   | Area *s   | Height [mAU] | Area %  |
|--------|---------------|------|-------------|------------|-----------|--------------|---------|
| 1      | 11.393        | VV   | 0.2065      | 3135.80078 | 233.04440 | 233.04440    | 49.9651 |
| 2      | 12.498        | VB   | 0.2359      | 3140.17627 | 204.50484 | 204.50484    | 50.0349 |

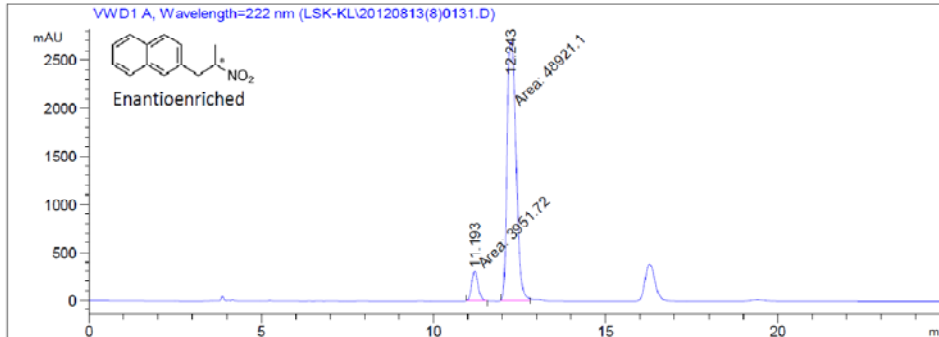

=====  
 Area Percent Report  
 =====

Sorted By : Signal  
 Multiplier : 1.0000  
 Dilution : 1.0000  
 Use Multiplier & Dilution Factor with ISTDs

Signal 1: VWD1 A, Wavelength=222 nm

| Peak # | RetTime [min] | Type | Width [min] | Area mAU   | Area *s    | Height [mAU] | Area %  |
|--------|---------------|------|-------------|------------|------------|--------------|---------|
| 1      | 11.193        | MM   | 0.2159      | 3951.72144 | 305.11908  | 305.11908    | 7.4740  |
| 2      | 12.243        | MM   | 0.3031      | 4.89211e4  | 2689.92993 | 2689.92993   | 92.5260 |

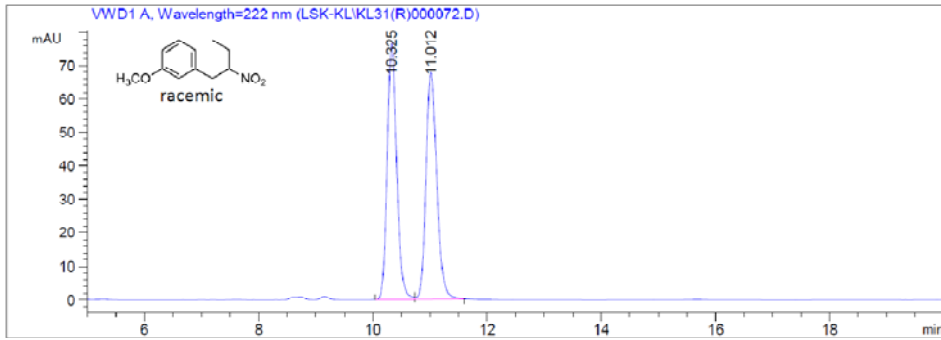

=====  
 Area Percent Report  
 =====

Sorted By : Signal  
 Multiplier : 1.0000  
 Dilution : 1.0000  
 Use Multiplier & Dilution Factor with ISTDs

Signal 1: VWD1 A, Wavelength=222 nm

| Peak # | RetTime [min] | Type | Width [min] | Area [mAU*s] | Height [mAU] | Area %  |
|--------|---------------|------|-------------|--------------|--------------|---------|
| 1      | 10.325        | BV   | 0.1791      | 888.96930    | 76.60941     | 49.9515 |
| 2      | 11.012        | VB   | 0.2013      | 890.69470    | 67.81270     | 50.0485 |

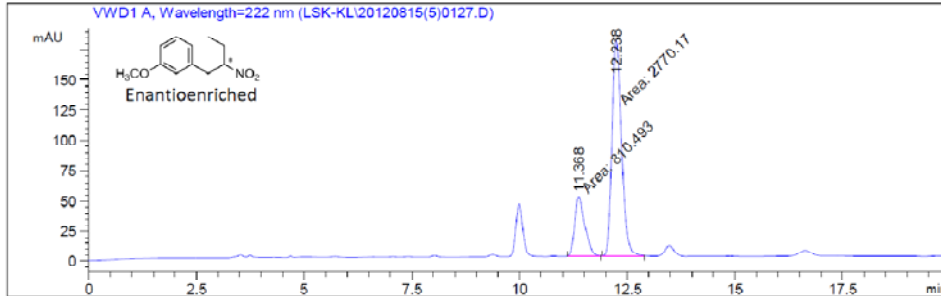

=====  
 Area Percent Report  
 =====

Sorted By : Signal  
 Multiplier : 1.0000  
 Dilution : 1.0000  
 Use Multiplier & Dilution Factor with ISTDs

Signal 1: VWD1 A, Wavelength=222 nm

| Peak # | RetTime [min] | Type | Width [min] | Area [mAU*s] | Height [mAU] | Area %  |
|--------|---------------|------|-------------|--------------|--------------|---------|
| 1      | 11.368        | MM   | 0.2728      | 810.49298    | 49.52109     | 22.6352 |
| 2      | 12.238        | MM   | 0.2586      | 2770.17456   | 178.54398    | 77.3648 |

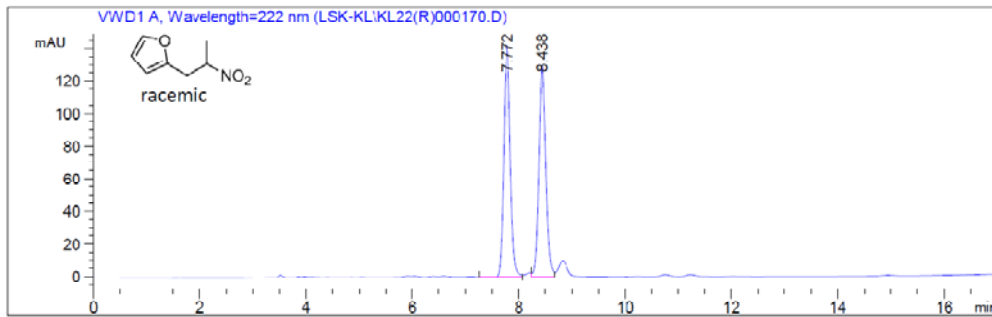

=====  
Area Percent Report  
=====

Sorted By : Signal  
Multiplier : 1.0000  
Dilution : 1.0000  
Use Multiplier & Dilution Factor with ISTDs

Signal 1: VWD1 A, Wavelength=222 nm

| Peak # | RetTime [min] | Type | Width [min] | Area mAU *s | Height [mAU] | Area %  |
|--------|---------------|------|-------------|-------------|--------------|---------|
| 1      | 7.772         | VV   | 0.1296      | 1187.38208  | 142.02644    | 50.0095 |
| 2      | 8.438         | VV   | 0.1412      | 1186.93323  | 130.36206    | 49.9905 |

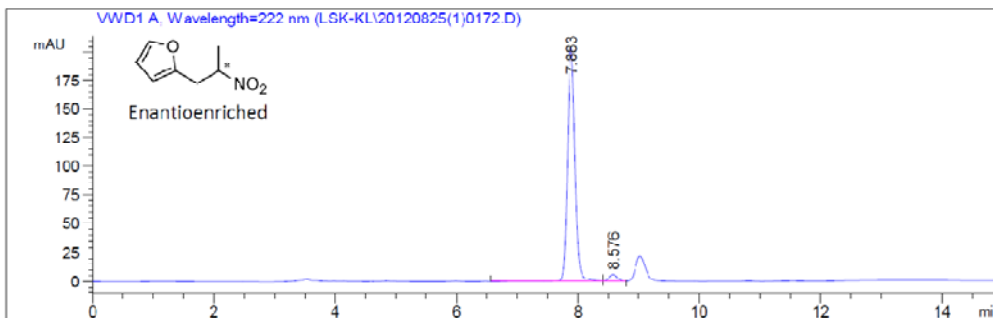

=====  
Area Percent Report  
=====

Sorted By : Signal  
Multiplier : 1.0000  
Dilution : 1.0000  
Use Multiplier & Dilution Factor with ISTDs

Signal 1: VWD1 A, Wavelength=222 nm

| Peak # | RetTime [min] | Type | Width [min] | Area mAU *s | Height [mAU] | Area %  |
|--------|---------------|------|-------------|-------------|--------------|---------|
| 1      | 7.883         | VV   | 0.1308      | 1750.20386  | 203.78961    | 96.7969 |
| 2      | 8.576         | VV   | 0.1487      | 57.91647    | 5.86507      | 3.2031  |



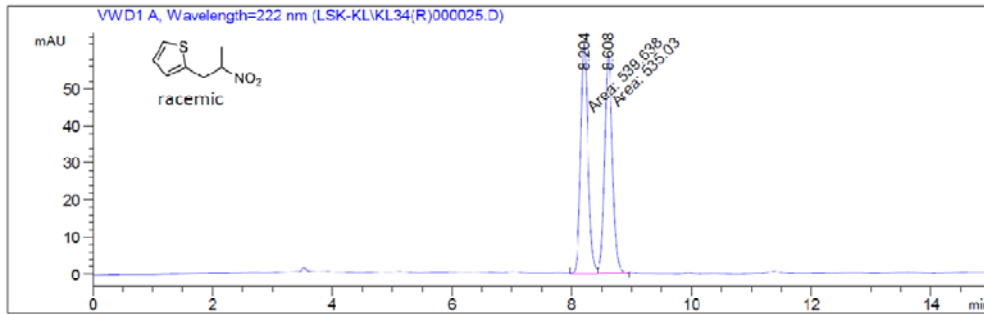

=====  
Area Percent Report  
=====

Sorted By : Signal  
Multiplier : 1.0000  
Dilution : 1.0000  
Use Multiplier & Dilution Factor with ISTDs

Signal 1: VWD1 A, Wavelength=222 nm

| Peak # | RetTime [min] | Type | Width [min] | Area mAU *s | Height [mAU] | Area %  |
|--------|---------------|------|-------------|-------------|--------------|---------|
| 1      | 8.204         | MM   | 0.1448      | 539.63837   | 62.10995     | 50.2144 |
| 2      | 8.608         | MM   | 0.1514      | 535.02985   | 58.90245     | 49.7856 |

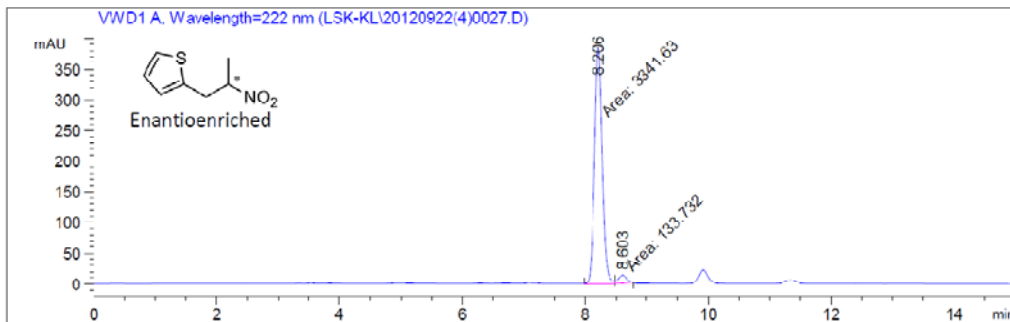

=====  
Area Percent Report  
=====

Sorted By : Signal  
Multiplier : 1.0000  
Dilution : 1.0000  
Use Multiplier & Dilution Factor with ISTDs

Signal 1: VWD1 A, Wavelength=222 nm

| Peak # | RetTime [min] | Type | Width [min] | Area mAU *s | Height [mAU] | Area %  |
|--------|---------------|------|-------------|-------------|--------------|---------|
| 1      | 8.206         | MM   | 0.1446      | 3341.62720  | 385.06290    | 96.1520 |
| 2      | 8.603         | MM   | 0.1563      | 133.73155   | 14.26393     | 3.8480  |

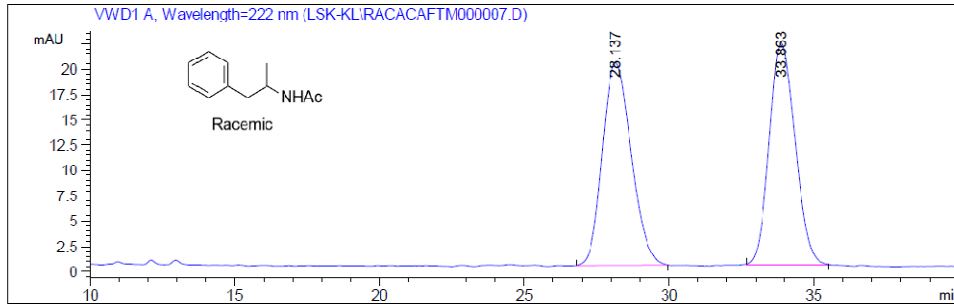

=====  
 Area Percent Report  
 =====

Sorted By : Signal  
 Multiplier : 1.0000  
 Dilution : 1.0000  
 Use Multiplier & Dilution Factor with ISTDs

Signal 1: VWD1 A, Wavelength=222 nm

| Peak # | RetTime [min] | Type | Width [min] | Area mAU   | Area %   | Height [mAU] | Area %  |
|--------|---------------|------|-------------|------------|----------|--------------|---------|
| 1      | 28.137        | BB   | 1.0806      | 1393.45105 | 20.07576 | 20.07576     | 50.5255 |
| 2      | 33.863        | BB   | 0.9618      | 1364.46399 | 21.97265 | 21.97265     | 49.4745 |

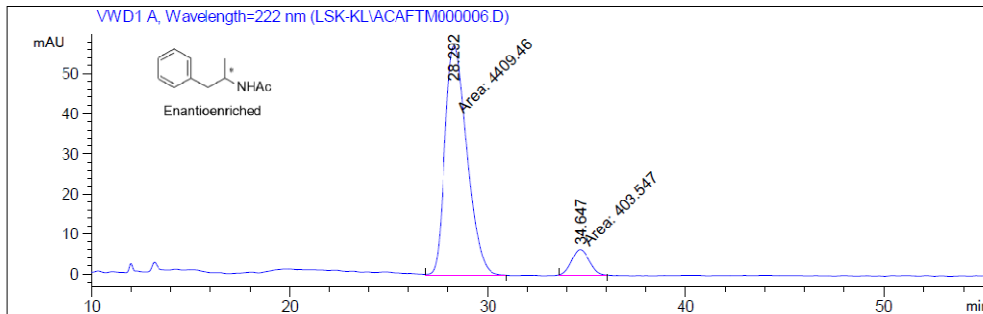

=====  
 Area Percent Report  
 =====

Sorted By : Signal  
 Multiplier : 1.0000  
 Dilution : 1.0000  
 Use Multiplier & Dilution Factor with ISTDs

Signal 1: VWD1 A, Wavelength=222 nm

| Peak # | RetTime [min] | Type | Width [min] | Area mAU   | Area %   | Height [mAU] | Area %  |
|--------|---------------|------|-------------|------------|----------|--------------|---------|
| 1      | 28.292        | MM   | 1.2821      | 4409.45898 | 57.32087 | 57.32087     | 91.6155 |
| 2      | 34.647        | MM   | 1.0602      | 403.54724  | 6.34377  | 6.34377      | 8.3845  |

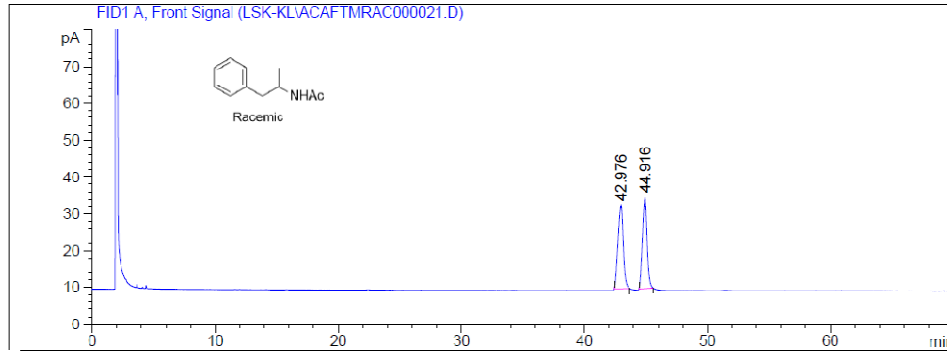

=====  
 Area Percent Report  
 =====

Sorted By : Signal  
 Multiplier : 1.0000  
 Dilution : 1.0000  
 Sample Amount : 1.00000 [ng/ul] (not used in calc.)  
 Use Multiplier & Dilution Factor with ISTDs

Signal 1: FID1 A, Front Signal

| Peak # | RetTime [min] | Type | Width [min] | Area [pA*s] | Height [pA] | Area %   |
|--------|---------------|------|-------------|-------------|-------------|----------|
| 1      | 42.976        | BB   | 0.3391      | 656.50165   | 22.85561    | 50.09132 |
| 2      | 44.916        | BB   | 0.3090      | 654.10791   | 24.89106    | 49.90868 |

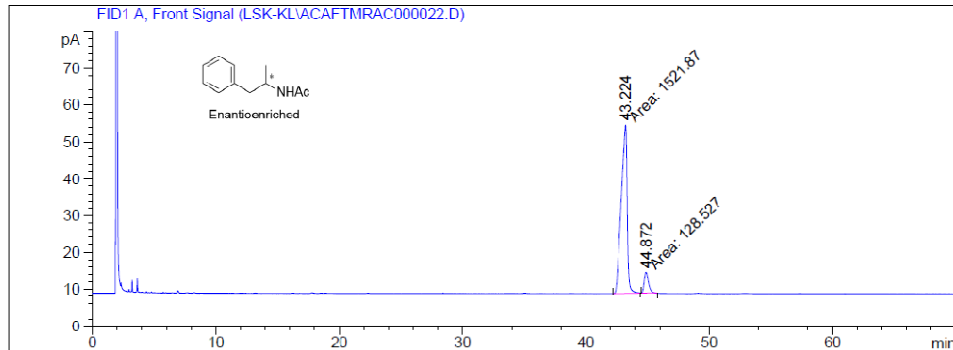

=====  
 Area Percent Report  
 =====

Sorted By : Signal  
 Multiplier : 1.0000  
 Dilution : 1.0000  
 Sample Amount : 1.00000 [ng/ul] (not used in calc.)  
 Use Multiplier & Dilution Factor with ISTDs

Signal 1: FID1 A, Front Signal

| Peak # | RetTime [min] | Type | Width [min] | Area [pA*s] | Height [pA] | Area %   |
|--------|---------------|------|-------------|-------------|-------------|----------|
| 1      | 43.224        | MM   | 0.5570      | 1521.86682  | 45.53423    | 92.21236 |
| 2      | 44.872        | MM   | 0.3945      | 128.52672   | 5.42969     | 7.78764  |

## **7 NMR spectra**

### **7.1 NMR spectra of $\alpha,\beta$ -Disubstituted Nitroalkenes**

### **7.2 NMR spectra of $\alpha$ -chiral nitroalkanes**

KL01  
 PROTON CDC13 {E:\NMR Data} skl 28

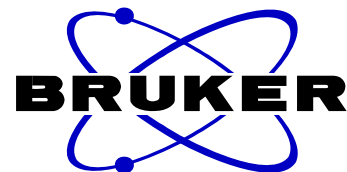

```

NAME      Jun23-2011
EXPNO     6
PROCNO    1
Date_     20110623
Time_     17.49
INSTRUM   spect
PROBHD    5 mm PABBO BB-
PULPROG   zg30
TD         65536
SOLVENT   CDC13
NS         64
DS         2
SWH        8223.685 Hz
FIDRES     0.125483 Hz
AQ         3.9846387 sec
RG         203
DW         60.800 usec
DE         6.50 usec
TE         302.3 K
D1         1.00000000 sec
TD0        1
  
```

8.0838  
 7.4814  
 7.4756  
 7.4714  
 7.4642  
 7.4606  
 7.4551  
 7.4518  
 7.4418  
 7.4352  
 7.4249  
 7.4165  
 7.4059  
 7.4035  
 7.4005  
 7.3957  
 7.3854  
 7.2569

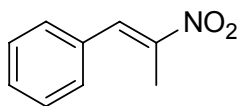

2.4534  
 2.4508

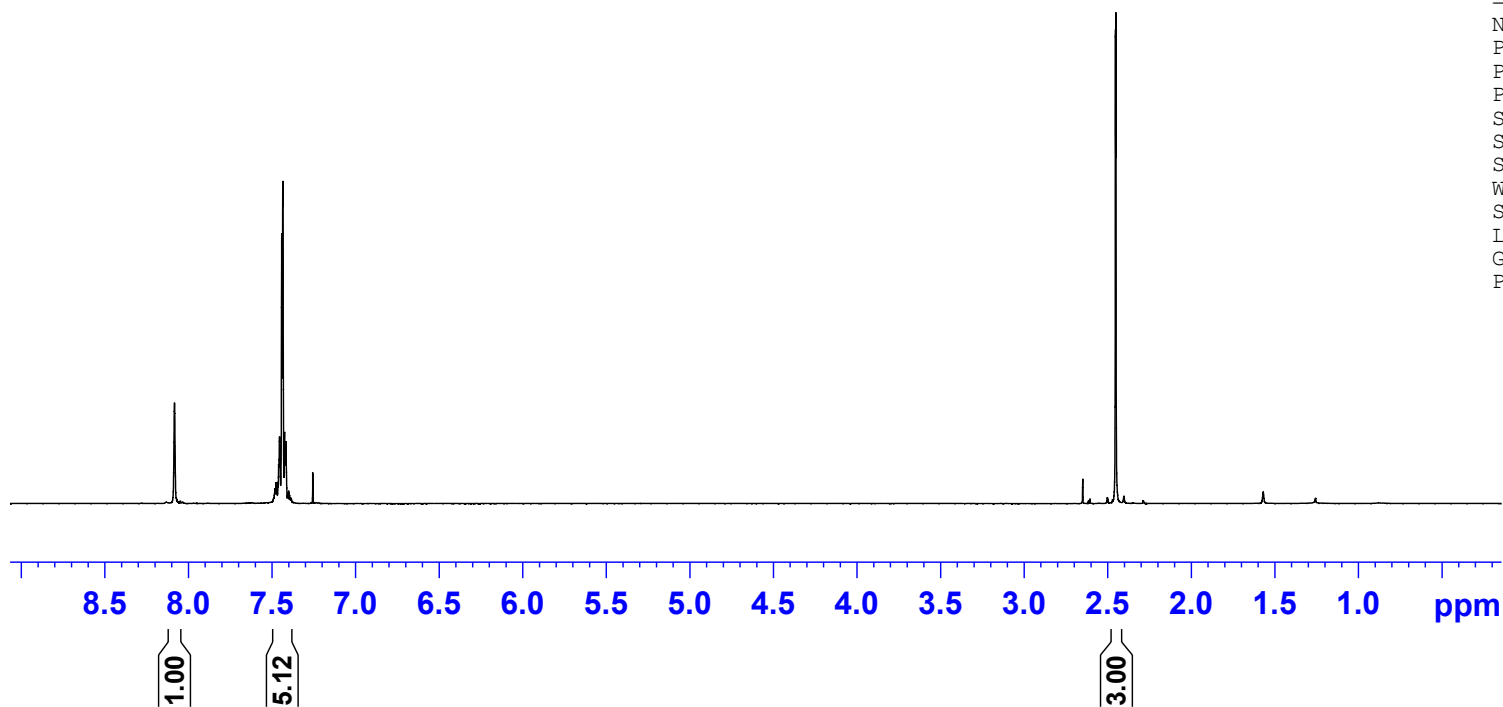

```

===== CHANNEL f1 =====
NUC1      1H
P1        8.76 usec
PL1       -2.00 dB
PL1W      31.17179108 W
SFO1      400.1324710 MHz
SI        32768
SF        400.1300113 MHz
WDW       EM
SSB       0
LB        0.30 Hz
GB        0
PC        1.00
  
```

KL01  
C13CPD CDC13 {E:\NMR Data} skl 28



NAME Jun23-2011  
EXPNO 7  
PROCNO 1  
Date\_ 20110623  
Time\_ 20.59  
INSTRUM spect  
PROBHD 5 mm PABBO BB-  
PULPROG zgpg30  
TD 65536  
SOLVENT CDC13  
NS 1500  
DS 4  
SWH 24038.461 Hz  
FIDRES 0.366798 Hz  
AQ 1.3631988 sec  
RG 2050  
DW 20.800 usec  
DE 6.50 usec  
TE 304.2 K  
D1 2.00000000 sec  
D11 0.03000000 sec  
TD0 1

===== CHANNEL f1 =====  
NUC1 13C  
P1 8.50 usec  
PL1 1.00 dB  
PL1W 75.02186584 W  
SFO1 100.6228298 MHz

===== CHANNEL f2 =====  
CPDPRG2 waltz16  
NUC2 1H  
PCPD2 90.00 usec  
PL2 -2.00 dB  
PL12 18.23 dB  
PL13 19.00 dB  
PL2W 31.17179108 W  
PL12W 0.29563907 W  
PL13W 0.24760634 W  
SFO2 400.1316005 MHz  
SI 32768  
SF 100.6127664 MHz  
WDW EM  
SSB 0  
LB 1.00 Hz  
GB 0  
PC 1.40

147.83  
133.49  
132.49  
129.96  
129.91  
128.92  
128.85

77.36  
77.05  
76.73

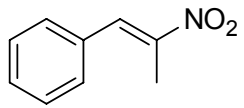

14.03

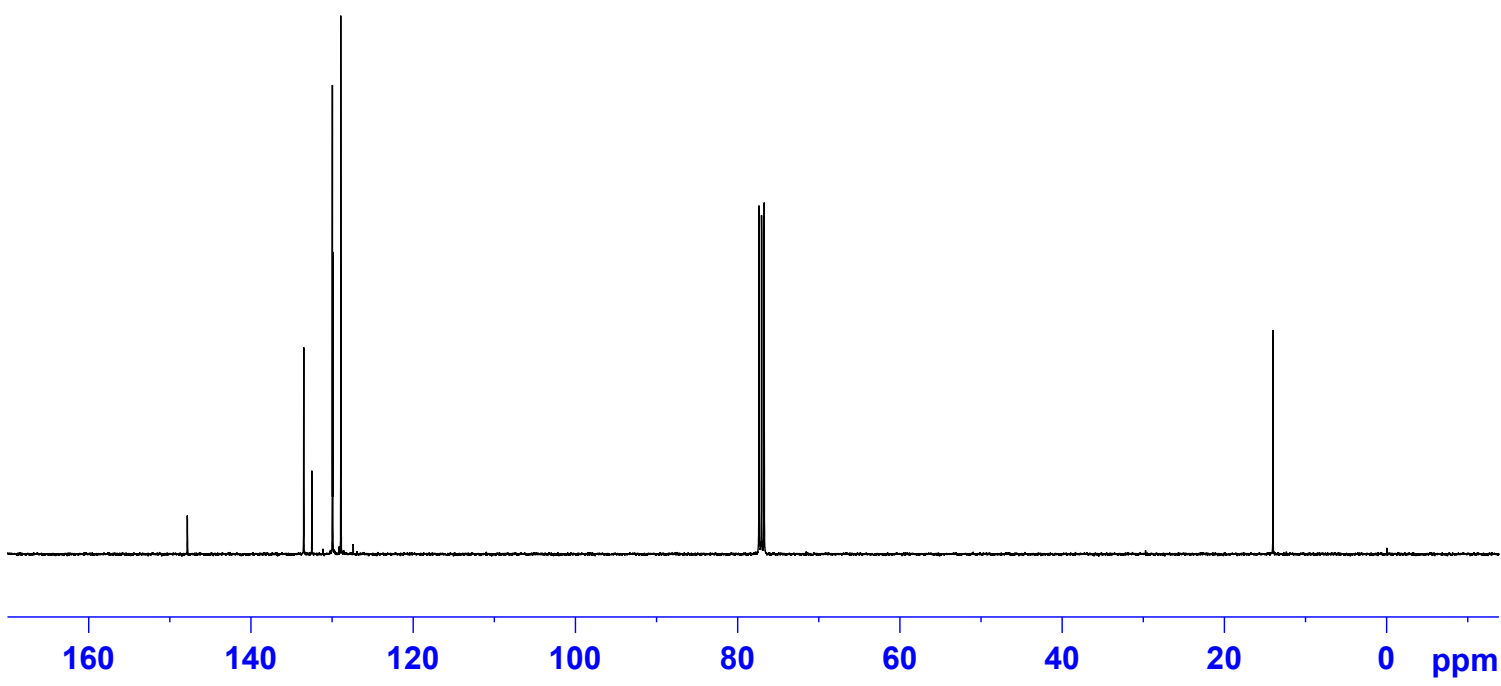

KL02  
PROTON CDCl3 {E:\NMR Data} skl 28

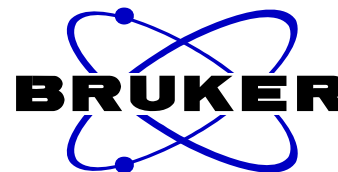

7.9955  
7.4042  
7.3996  
7.3949  
7.3918  
7.3155  
7.3119  
7.3048  
7.3009  
7.2991  
7.2952  
7.2900  
7.2622

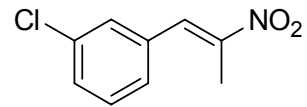

2.4384  
2.4358

NAME Jun29-2011  
EXPNO 5  
PROCNO 1  
Date\_ 20110629  
Time\_ 18.06  
INSTRUM spect  
PROBHD 5 mm PABBO BB-  
PULPROG zg30  
TD 65536  
SOLVENT CDCl3  
NS 64  
DS 2  
SWH 8223.685 Hz  
FIDRES 0.125483 Hz  
AQ 3.9846387 sec  
RG 181  
DW 60.800 usec  
DE 6.50 usec  
TE 302.4 K  
D1 1.00000000 sec  
TD0 1

===== CHANNEL f1 =====  
NUC1 1H  
P1 8.76 usec  
PL1 -2.00 dB  
PL1W 31.17179108 W  
SFO1 400.1324710 MHz  
SI 32768  
SF 400.1300087 MHz  
WDW EM  
SSB 0  
LB 0.30 Hz  
GB 0  
PC 1.00

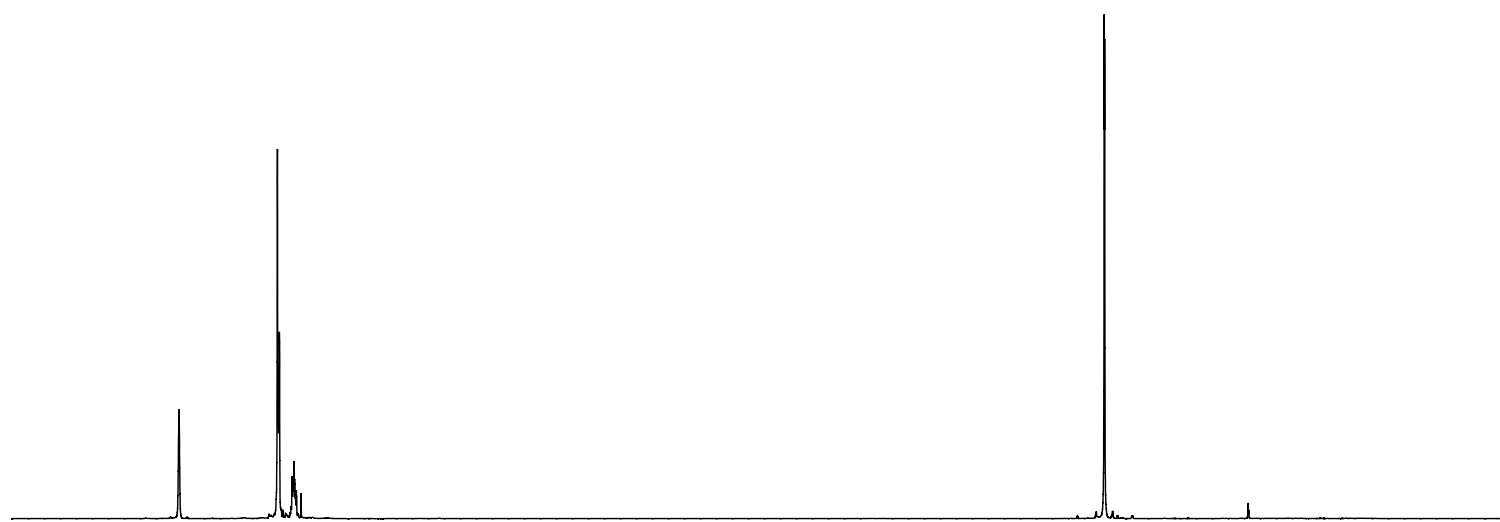

8.5 8.0 7.5 7.0 6.5 6.0 5.5 5.0 4.5 4.0 3.5 3.0 2.5 2.0 1.5 1.0 ppm

0.99

2.98  
1.03

3.00

KL02  
C13CPD CDC13 {E:\NMR Data} skl 28

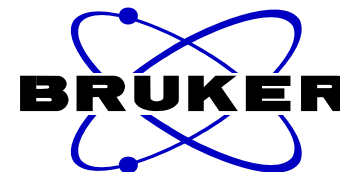

NAME Jun29-2011  
EXPNO 6  
PROCNO 1  
Date\_ 20110701  
Time\_ 5.10  
INSTRUM spect  
PROBHD 5 mm PABBO BB-  
PULPROG zgpg30  
TD 65536  
SOLVENT CDC13  
NS 1024  
DS 4  
SWH 24038.461 Hz  
FIDRES 0.366798 Hz  
AQ 1.3631988 sec  
RG 2050  
DW 20.800 usec  
DE 6.50 usec  
TE 303.9 K  
D1 2.00000000 sec  
D11 0.03000000 sec  
TD0 1

===== CHANNEL f1 =====  
NUC1 13C  
P1 8.50 usec  
PL1 1.00 dB  
PL1W 75.02186584 W  
SFO1 100.6228298 MHz

===== CHANNEL f2 =====  
CPDPRG2 waltz16  
NUC2 1H  
PCPD2 90.00 usec  
PL2 -2.00 dB  
PL12 18.23 dB  
PL13 19.00 dB  
PL2W 31.17179108 W  
PL12W 0.29563907 W  
PL13W 0.24760634 W  
SFO2 400.1316005 MHz  
SI 32768  
SF 100.6127661 MHz  
WDW EM  
SSB 0  
LB 1.00 Hz  
GB 0  
PC 1.40

148.83  
134.97  
134.25  
131.85  
130.19  
129.87  
129.62  
127.95

77.37  
77.06  
76.74

14.00

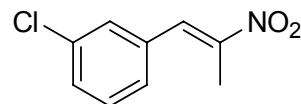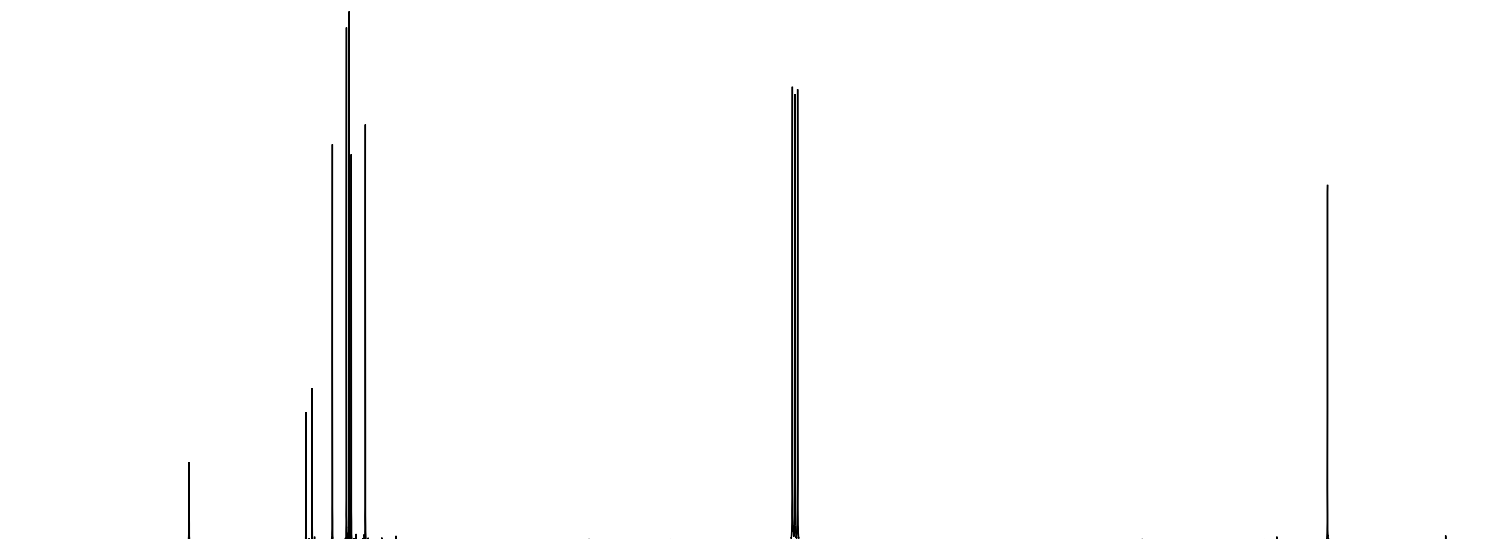

160 150 140 130 120 110 100 90 80 70 60 50 40 30 20 10 ppm



KL16  
PROTON CDC13 {E:\NMR Data} skl 28



8.0151  
7.3771  
7.3574  
7.3375  
7.2660  
7.0120  
6.9929  
6.9707  
6.9647  
6.9498  
6.9441  
6.9292

3.8286

2.4275

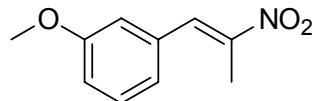

NAME Jul22-2012  
EXPNO 3  
PROCNO 1  
Date\_ 20120722  
Time\_ 18.05  
INSTRUM spect  
PROBHD 5 mm PABBO BB-  
PULPROG zg30  
TD 65536  
SOLVENT CDC13  
NS 44  
DS 2  
SWH 8223.685 Hz  
FIDRES 0.125483 Hz  
AQ 3.9846387 sec  
RG 45.2  
DW 60.800 usec  
DE 6.50 usec  
TE 300.4 K  
D1 1.00000000 sec  
TD0 1

===== CHANNEL f1 =====  
NUC1 1H  
P1 8.76 usec  
PL1 -2.00 dB  
PL1W 31.17179108 W  
SFO1 400.1324710 MHz  
SI 32768  
SF 400.1300072 MHz  
WDW EM  
SSB 0  
LB 0.30 Hz  
GB 0  
PC 1.00

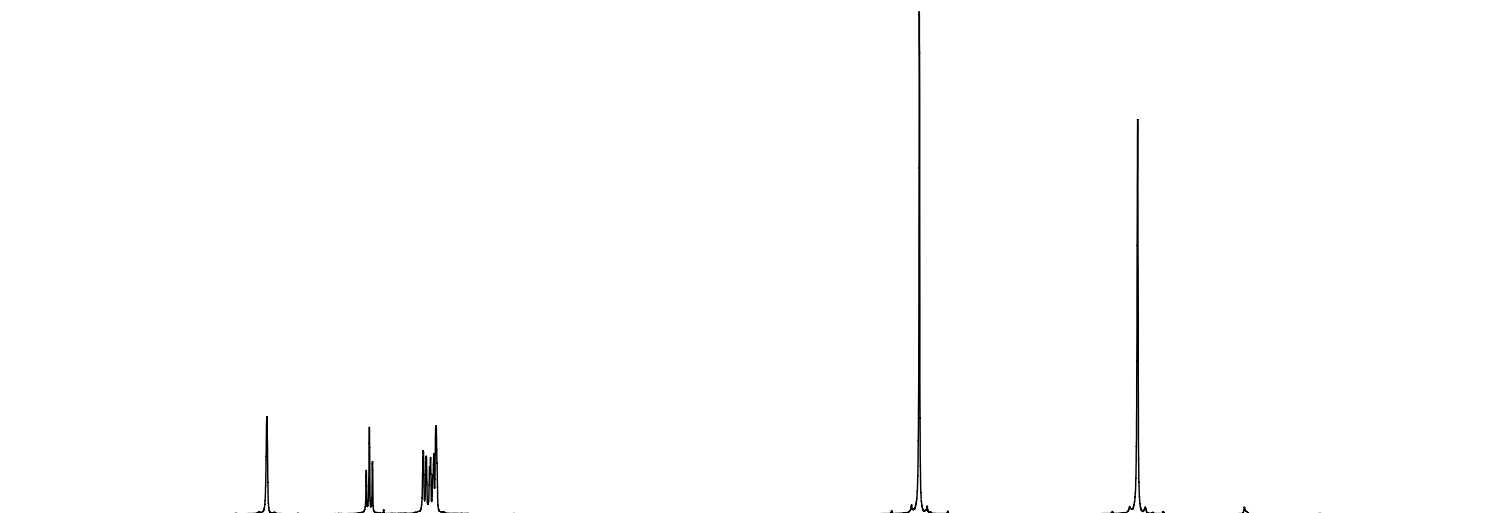

9.5 9.0 8.5 8.0 7.5 7.0 6.5 6.0 5.5 5.0 4.5 4.0 3.5 3.0 2.5 2.0 1.5 1.0 ppm

0.97

1.01

3.04

3.00

2.97

KL16  
C13CPD CDC13 {E:\NMR Data} skl 28



NAME Jul22-2012  
EXPNO 5  
PROCNO 1  
Date\_ 20120722  
Time\_ 19.37  
INSTRUM spect  
PROBHD 5 mm PABBO BB-  
PULPROG zgpg30  
TD 65536  
SOLVENT CDC13  
NS 1024  
DS 4  
SWH 24038.461 Hz  
FIDRES 0.366798 Hz  
AQ 1.3631988 sec  
RG 2050  
DW 20.800 usec  
DE 6.50 usec  
TE 302.4 K  
D1 2.00000000 sec  
D11 0.03000000 sec  
TD0 1

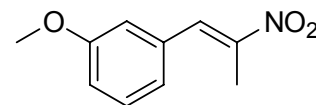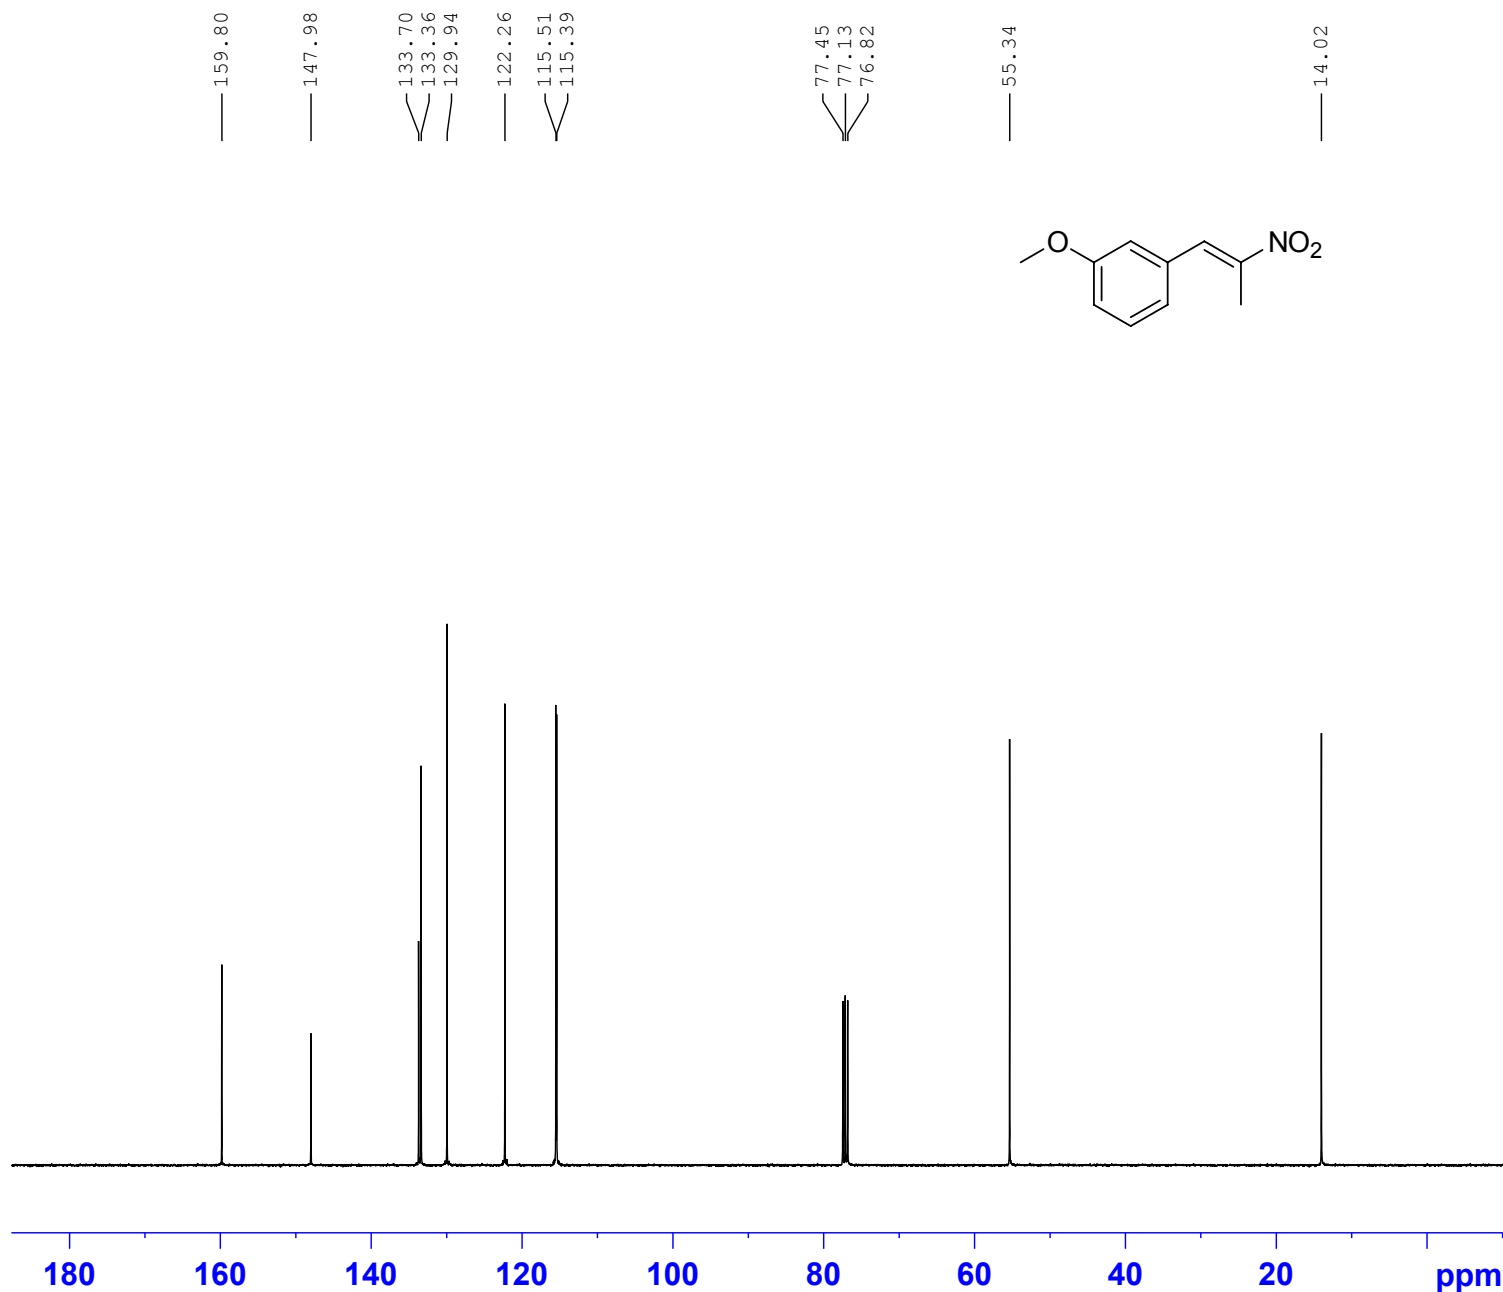

===== CHANNEL f1 =====  
NUC1 13C  
P1 8.50 usec  
PL1 1.00 dB  
PL1W 75.02186584 W  
SFO1 100.6228298 MHz

===== CHANNEL f2 =====  
CPDPRG2 waltz16  
NUC2 1H  
PCPD2 90.00 usec  
PL2 -2.00 dB  
PL12 18.23 dB  
PL13 19.00 dB  
PL2W 31.17179108 W  
PL12W 0.29563907 W  
PL13W 0.24760634 W  
SFO2 400.1316005 MHz  
SI 32768  
SF 100.6127690 MHz  
WDW EM  
SSB 0  
LB 1.00 Hz  
GB 0  
PC 1.40

KL28  
PROTON CDC13 {E:\NMR Data} skl 28

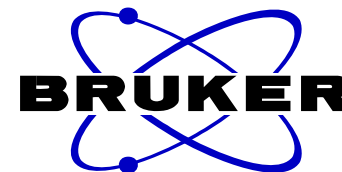

NAME Jul28-2012  
EXPNO 11  
PROCNO 1  
Date\_ 20120729  
Time\_ 10.57  
INSTRUM spect  
PROBHD 5 mm PABBO BB-  
PULPROG zg30  
TD 65536  
SOLVENT CDC13  
NS 32  
DS 2  
SWH 8223.685 Hz  
FIDRES 0.125483 Hz  
AQ 3.9846387 sec  
RG 228  
DW 60.800 usec  
DE 6.50 usec  
TE 301.0 K  
D1 1.00000000 sec  
TD0 1

===== CHANNEL f1 =====  
NUC1 1H  
P1 8.76 usec  
PL1 -2.00 dB  
PL1W 31.17179108 W  
SFO1 400.1324710 MHz  
SI 32768  
SF 400.1300069 MHz  
WDW EM  
SSB 0  
LB 0.30 Hz  
GB 0  
PC 1.00

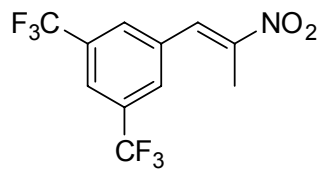

8.0882  
7.9396  
7.8595  
7.2673

2.4593  
2.4566

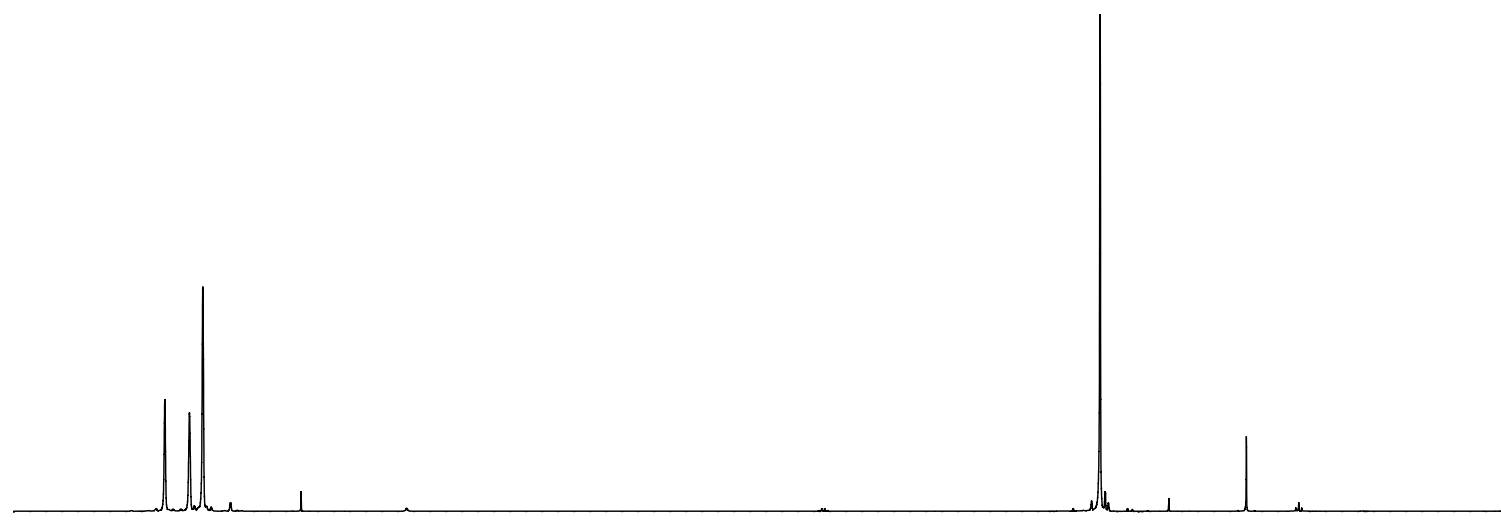

8.5 8.0 7.5 7.0 6.5 6.0 5.5 5.0 4.5 4.0 3.5 3.0 2.5 2.0 1.5 1.0 ppm

0.99  
1.02  
2.01

3.00

KL28  
C13CPD32 CDC13 {E:\NMR Data} sk1 28



150.47  
134.68  
133.09  
132.75  
132.41  
132.08  
129.86  
129.43  
129.40  
124.20  
123.22  
123.19  
123.15  
123.11  
121.49

77.30  
76.99  
76.67

13.83

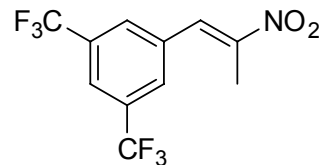

NAME Jul28-2012  
EXPNO 14  
PROCNO 1  
Date\_ 20120729  
Time\_ 12.40  
INSTRUM spect  
PROBHD 5 mm PABBO BB-  
PULPROG zgpg30  
TD 65536  
SOLVENT CDC13  
NS 1024  
DS 2  
SWH 24038.461 Hz  
FIDRES 0.366798 Hz  
AQ 1.3631988 sec  
RG 2050  
DW 20.800 usec  
DE 6.50 usec  
TE 302.5 K  
D1 2.00000000 sec  
D11 0.03000000 sec  
TD0 1

===== CHANNEL f1 =====  
NUC1 13C  
P1 8.50 usec  
PL1 1.00 dB  
PL1W 75.02186584 W  
SFO1 100.6228298 MHz

===== CHANNEL f2 =====  
CPDPRG2 waltz16  
NUC2 1H  
PCPD2 90.00 usec  
PL2 -2.00 dB  
PL12 18.23 dB  
PL13 19.00 dB  
PL2W 31.17179108 W  
PL12W 0.29563907 W  
PL13W 0.24760634 W  
SFO2 400.1316005 MHz  
SI 32768  
SF 100.6127690 MHz  
WDW EM  
SSB 0  
LB 1.00 Hz  
GB 0  
PC 1.40

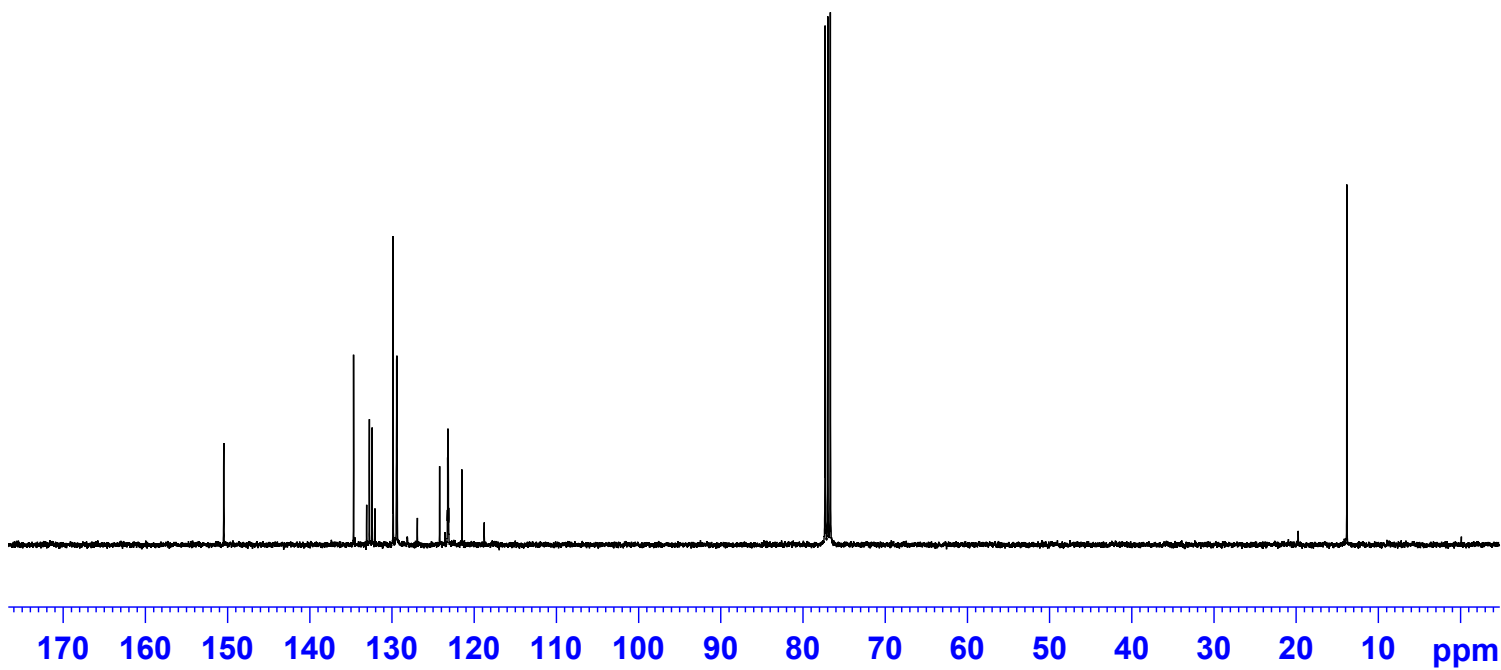

KL28  
f19cpd.medchem CDC13 {E:\NMR Data} skl 28

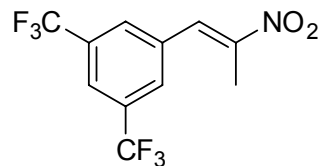

NAME Jul28-2012  
EXPNO 13  
PROCNO 1  
Date\_ 20120729  
Time\_ 11.39  
INSTRUM spect  
PROBHD 5 mm PABBO BB-  
PULPROG zgdc60  
TD 131072  
SOLVENT CDC13  
NS 128  
DS 4  
SWH 93750.000 Hz  
FIDRES 0.715256 Hz  
AQ 0.6991007 sec  
RG 512  
DW 5.333 usec  
DE 6.50 usec  
TE 302.3 K  
D1 3.00000000 sec  
D11 0.03000000 sec  
TD0 1

==== CHANNEL f1 =====  
NUC1 19F  
P1 14.00 usec  
PL1 1.50 dB  
PL1W 35.56558990 W  
SFO1 376.4569512 MHz

==== CHANNEL f2 =====  
CPDPRG2 waltz16  
NUC2 1H  
PCPD2 90.00 usec  
PL2 -2.00 dB  
PL12 18.23 dB  
PL2W 31.17179108 W  
PL12W 0.29563907 W  
SFO2 400.1316005 MHz  
SI 65536  
SF 376.4983660 MHz  
WDW EM  
SSB 0  
LB 0.87 Hz  
GB 0  
PC 1.00

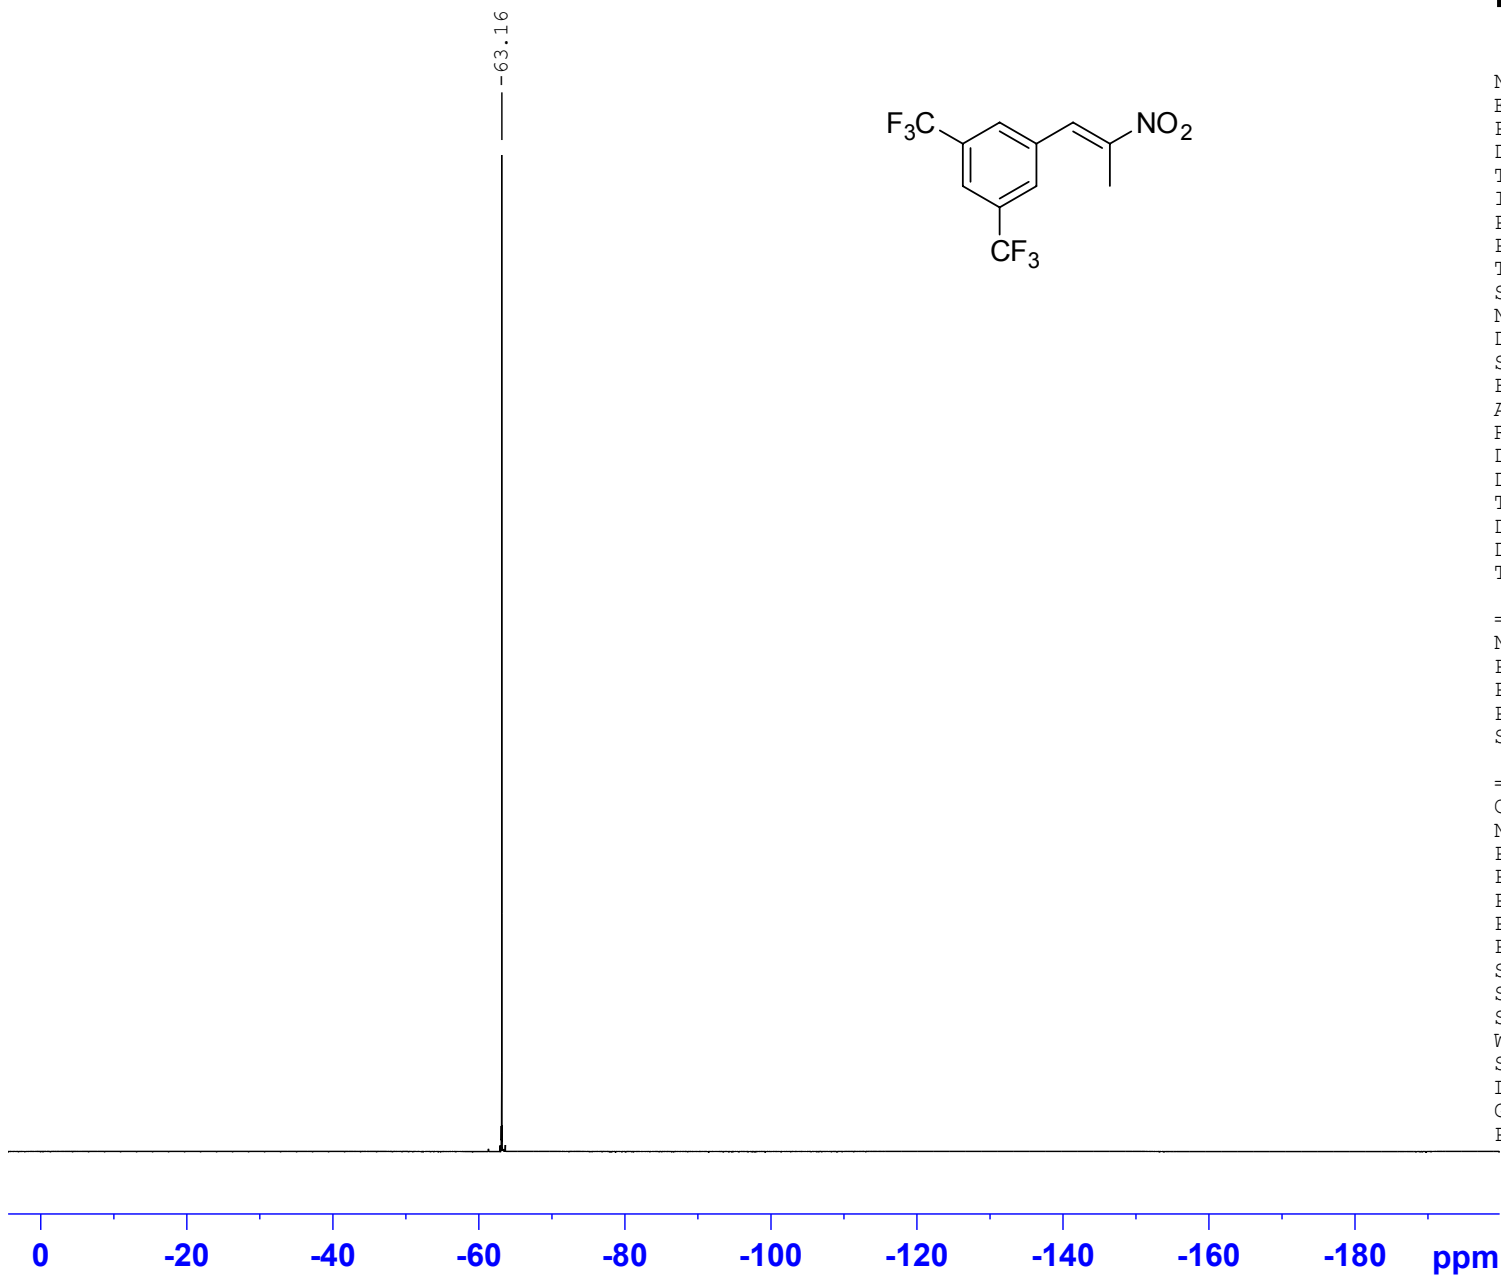

KL08  
PROTON CDC13 {E:\NMR Data} skl 44



NAME Jul17-2012  
EXPNO 13  
PROCNO 1  
Date\_ 20120718  
Time\_ 9.46  
INSTRUM spect  
PROBHD 5 mm PABBO BB-  
PULPROG zg30  
TD 65536  
SOLVENT CDC13  
NS 44  
DS 2  
SWH 8223.685 Hz  
FIDRES 0.125483 Hz  
AQ 3.9846387 sec  
RG 287  
DW 60.800 usec  
DE 6.50 usec  
TE 303.6 K  
D1 1.00000000 sec  
TD0 1

===== CHANNEL f1 =====  
NUC1 1H  
P1 8.76 usec  
PL1 -2.00 dB  
PL1W 31.17179108 W  
SFO1 400.1324710 MHz  
SI 32768  
SF 400.1300072 MHz  
WDW EM  
SSB 0  
LB 0.30 Hz  
GB 0  
PC 1.00

8.0606  
7.2662  
7.1004  
7.0955  
7.0795  
7.0746  
6.9642  
6.9592  
6.9542  
6.9332

3.9370  
3.9154

2.4910

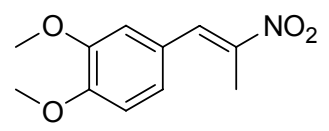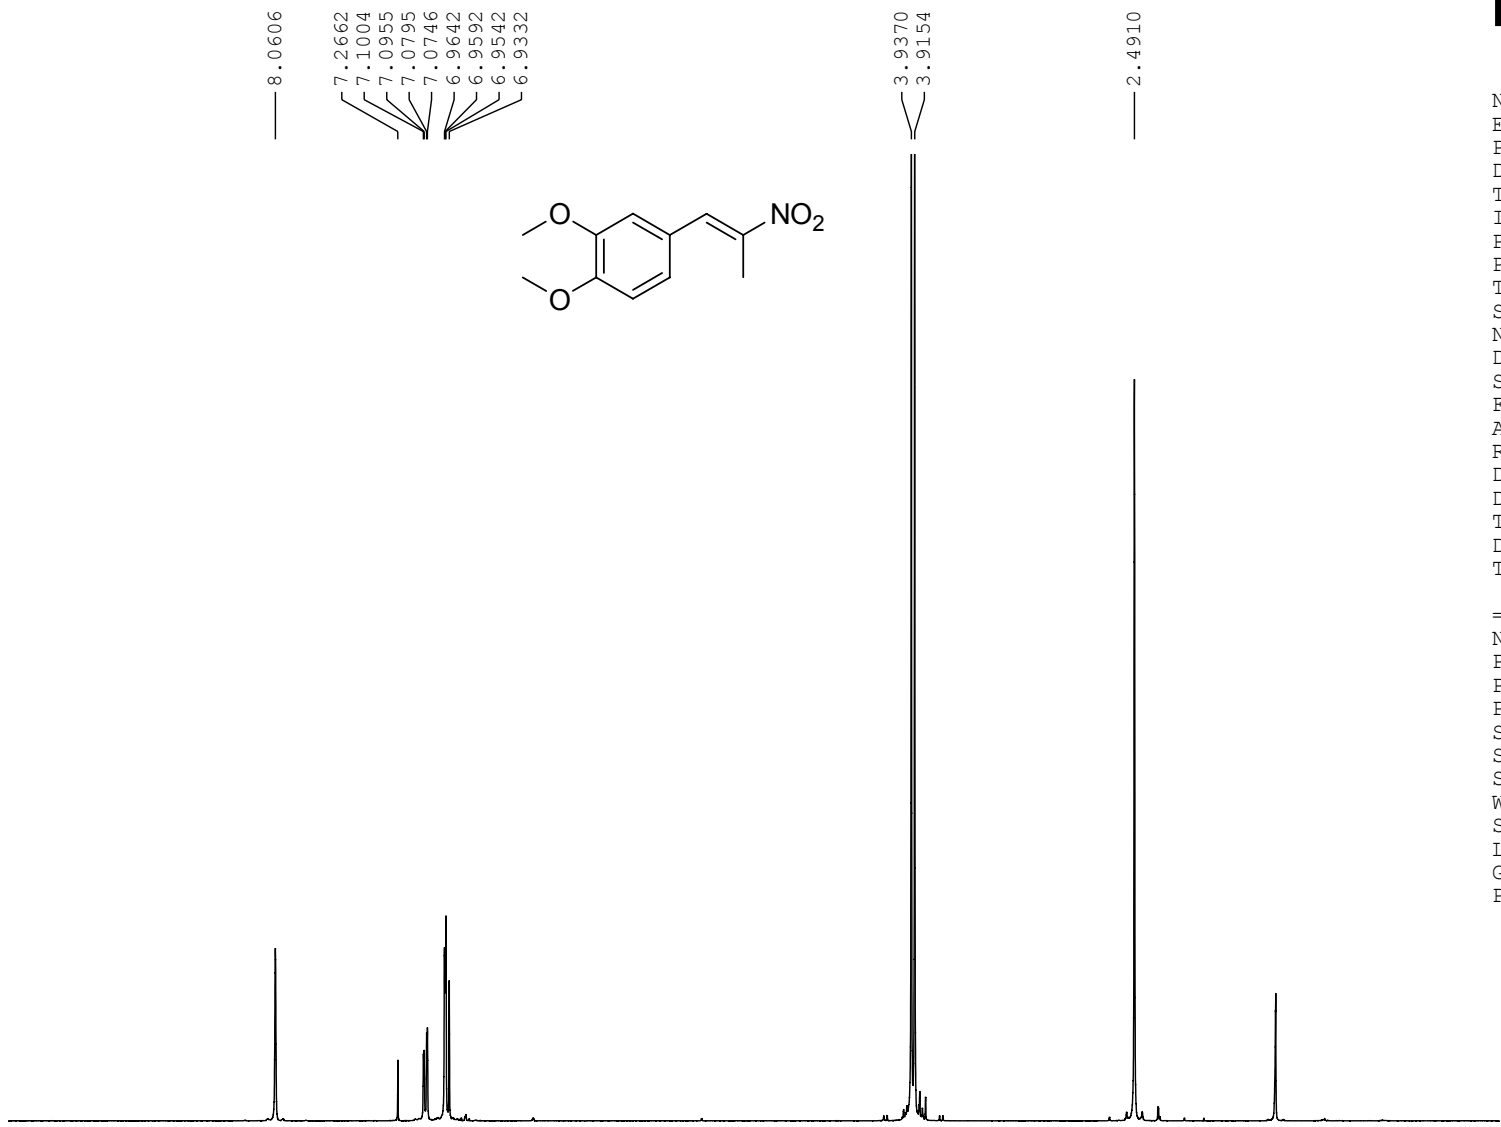

9.5 9.0 8.5 8.0 7.5 7.0 6.5 6.0 5.5 5.0 4.5 4.0 3.5 3.0 2.5 2.0 1.5 1.0 ppm

0.99

1.03  
2.00

3.06  
2.98

3.00

KL08  
 C13CPD CDC13 {E:\NMR Data} skl 44



150.86  
 149.20  
 145.99

133.73

125.07  
 123.99

113.22  
 111.36

77.32  
 77.00  
 76.69

56.03  
 56.01

14.13

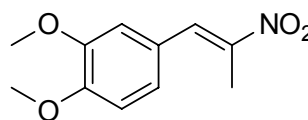

NAME Jul17-2012  
 EXPNO 9  
 PROCNO 1  
 Date\_ 20120718  
 Time\_ 0.00  
 INSTRUM spect  
 PROBHD 5 mm PABBO BB-  
 PULPROG zgpg30  
 TD 65536  
 SOLVENT CDC13  
 NS 2048  
 DS 4  
 SWH 24038.461 Hz  
 FIDRES 0.366798 Hz  
 AQ 1.3631988 sec  
 RG 2050  
 DW 20.800 usec  
 DE 6.50 usec  
 TE 306.2 K  
 D1 2.00000000 sec  
 D11 0.03000000 sec  
 TD0 1

===== CHANNEL f1 =====  
 NUC1 13C  
 P1 8.50 usec  
 PL1 1.00 dB  
 PL1W 75.02186584 W  
 SFO1 100.6228298 MHz

===== CHANNEL f2 =====  
 CPDPRG2 waltz16  
 NUC2 1H  
 PCPD2 90.00 usec  
 PL2 -2.00 dB  
 PL12 18.23 dB  
 PL13 19.00 dB  
 PL2W 31.17179108 W  
 PL12W 0.29563907 W  
 PL13W 0.24760634 W  
 SFO2 400.1316005 MHz  
 SI 32768  
 SF 100.6127690 MHz  
 WDW EM  
 SSB 0  
 LB 1.00 Hz  
 GB 0  
 PC 1.40

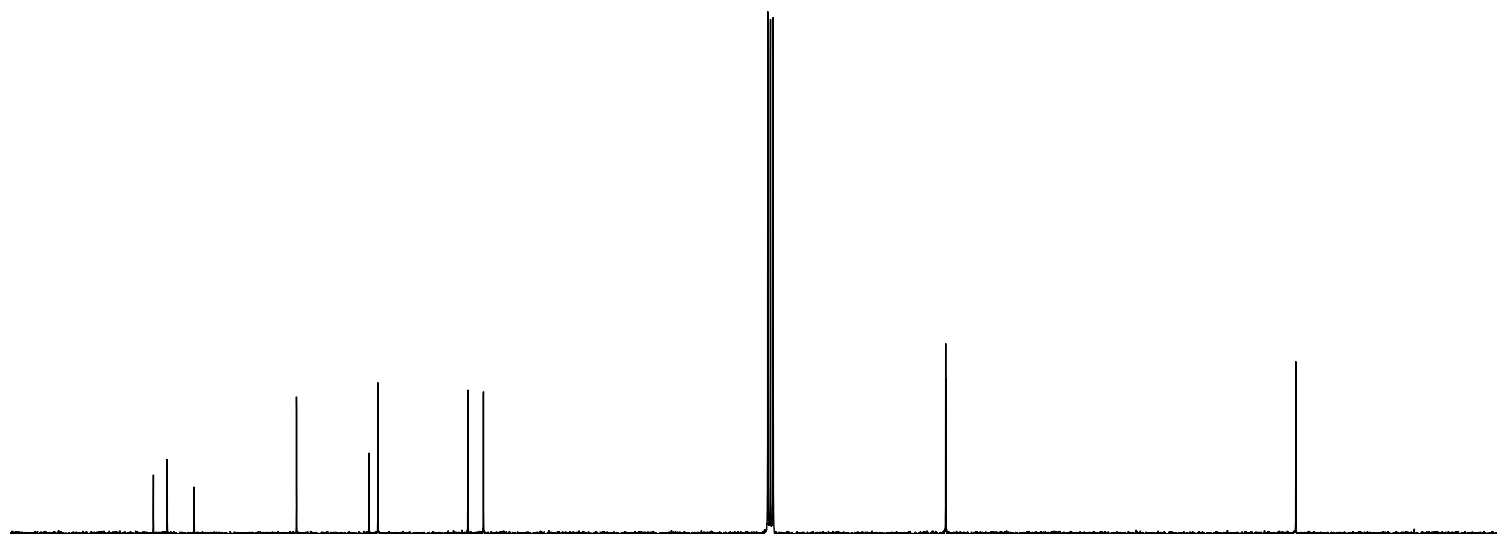

160 150 140 130 120 110 100 90 80 70 60 50 40 30 20 10 ppm

KL06  
PROTON CDC13 {E:\NMR Data} skl 14



8.0605  
7.4362  
7.4292  
7.4236  
7.4120  
7.4070  
7.3995  
6.9916  
6.9845  
6.9794  
6.9673  
6.9624  
6.9550

3.8582

2.4653

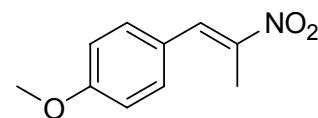

NAME Jul16-2012  
EXPNO 11  
PROCNO 1  
Date\_ 20120716  
Time\_ 21.07  
INSTRUM spect  
PROBHD 5 mm PABBO BB-  
PULPROG zg30  
TD 65536  
SOLVENT CDC13  
NS 44  
DS 2  
SWH 8223.685 Hz  
FIDRES 0.125483 Hz  
AQ 3.9846387 sec  
RG 161  
DW 60.800 usec  
DE 6.50 usec  
TE 304.6 K  
D1 1.00000000 sec  
TD0 1

===== CHANNEL f1 =====  
NUC1 1H  
P1 8.76 usec  
PL1 -2.00 dB  
PL1W 31.17179108 W  
SFO1 400.1324710 MHz  
SI 32768  
SF 400.1300089 MHz  
WDW EM  
SSB 0  
LB 0.30 Hz  
GB 0  
PC 1.00

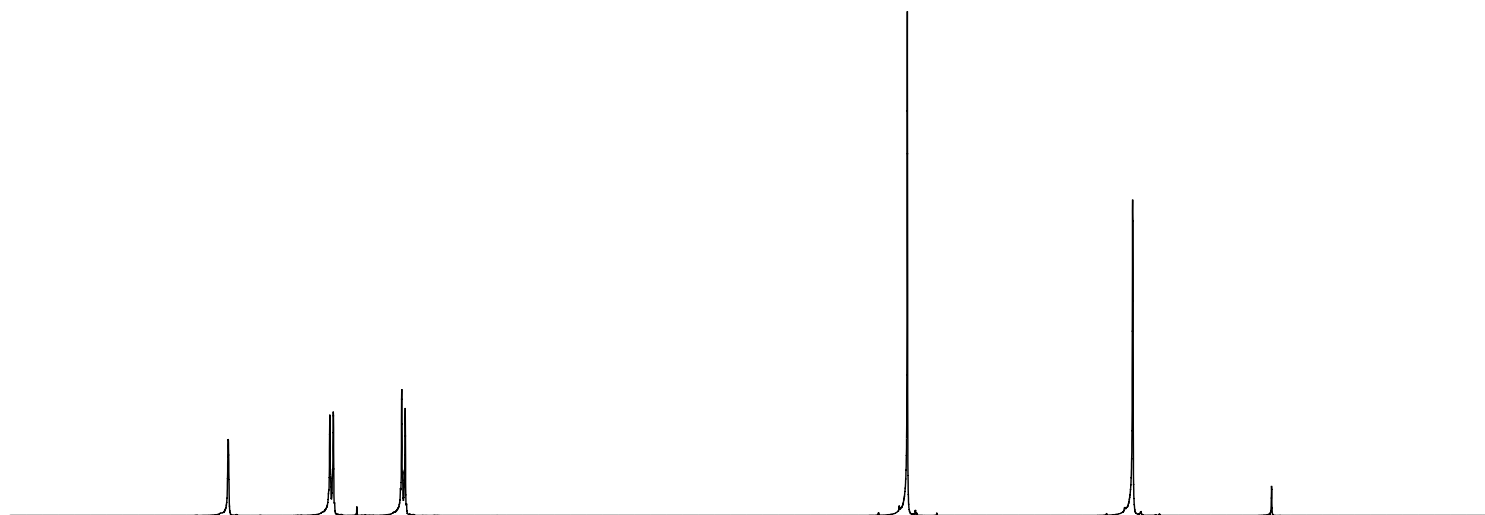

9.0 8.5 8.0 7.5 7.0 6.5 6.0 5.5 5.0 4.5 4.0 3.5 3.0 2.5 2.0 1.5 1.0 ppm

1.04

2.09

2.07

3.14

3.00



KL06  
C13CPD CDC13 {E:\NMR Data} skl 14

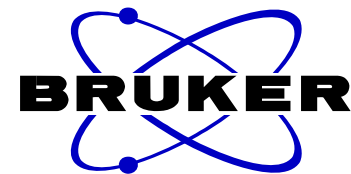

NAME Jul16-2012  
EXPNO 13  
PROCNO 1  
Date\_ 20120716  
Time\_ 22.38  
INSTRUM spect  
PROBHD 5 mm PABBO BB-  
PULPROG zgpg30  
TD 65536  
SOLVENT CDC13  
NS 1024  
DS 4  
SWH 24038.461 Hz  
FIDRES 0.366798 Hz  
AQ 1.3631988 sec  
RG 2050  
DW 20.800 usec  
DE 6.50 usec  
TE 306.3 K  
D1 2.00000000 sec  
D11 0.03000000 sec  
TD0 1

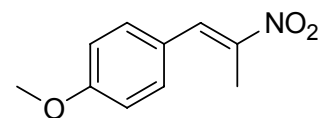

161.13  
145.77  
133.52  
132.05  
124.76  
114.50  
77.35  
77.03  
76.71  
55.41  
14.07

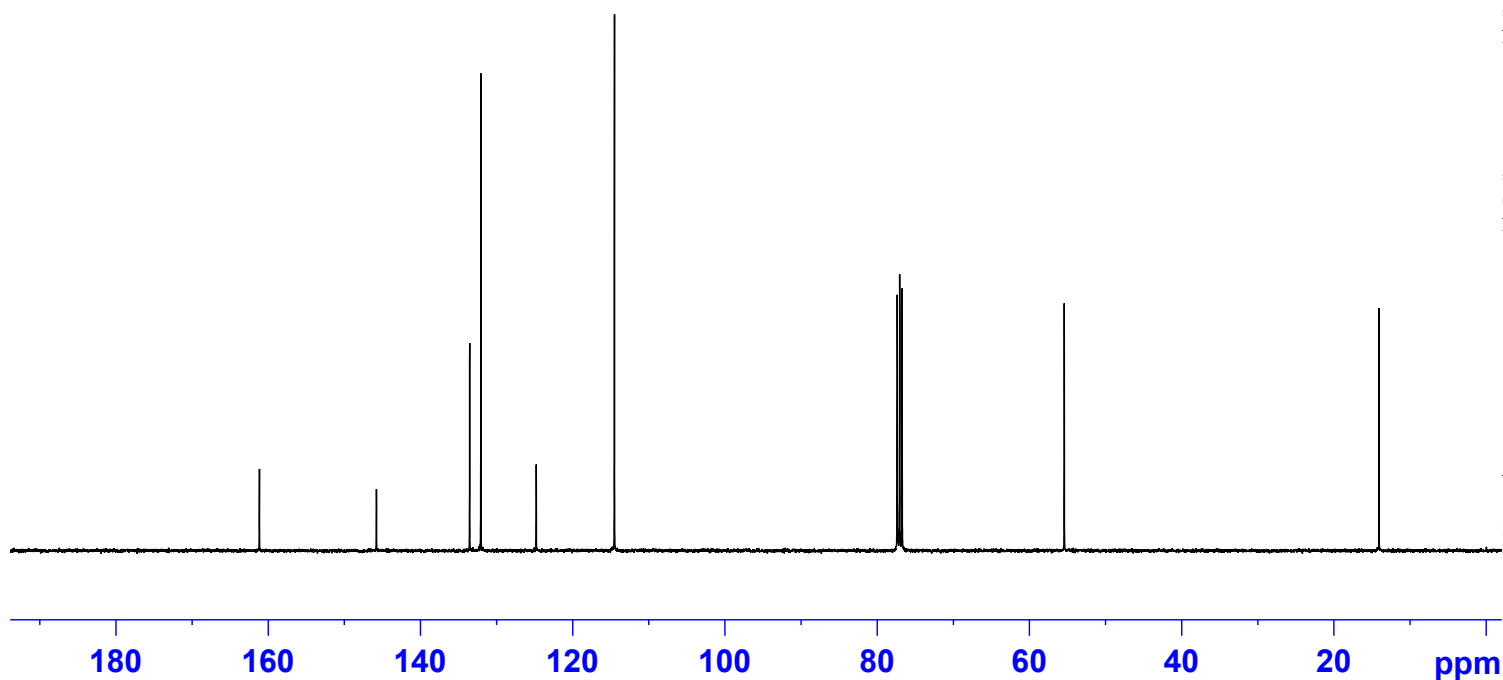

==== CHANNEL f1 =====  
NUC1 13C  
P1 8.50 usec  
PL1 1.00 dB  
PL1W 75.02186584 W  
SFO1 100.6228298 MHz

==== CHANNEL f2 =====  
CPDPRG2 waltz16  
NUC2 1H  
PCPD2 90.00 usec  
PL2 -2.00 dB  
PL12 18.23 dB  
PL13 19.00 dB  
PL2W 31.17179108 W  
PL12W 0.29563907 W  
PL13W 0.24760634 W  
SFO2 400.1316005 MHz  
SI 32768  
SF 100.6127690 MHz  
WDW EM  
SSB 0  
LB 1.00 Hz  
GB 0  
PC 1.40

KL07  
PROTON CDC13 {E:\NMR Data} skl 15



8.0479  
7.4516  
7.4467  
7.4383  
7.4342  
7.4300  
7.4215  
7.4168  
7.2605  
7.1822  
7.1749  
7.1696  
7.1576  
7.1535  
7.1489  
7.1370  
7.1319

2.4443  
2.4426

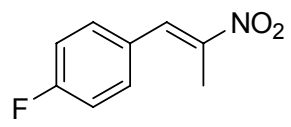

NAME Jul16-2012  
EXPNO 14  
PROCNO 1  
Date\_ 20120716  
Time\_ 22.47  
INSTRUM spect  
PROBHD 5 mm PABBO BB-  
PULPROG zg30  
TD 65536  
SOLVENT CDC13  
NS 44  
DS 2  
SWH 8223.685 Hz  
FIDRES 0.125483 Hz  
AQ 3.9846387 sec  
RG 406  
DW 60.800 usec  
DE 6.50 usec  
TE 304.9 K  
D1 1.00000000 sec  
TD0 1

===== CHANNEL f1 =====  
NUC1 1H  
P1 8.76 usec  
PL1 -2.00 dB  
PL1W 31.17179108 W  
SFO1 400.1324710 MHz  
SI 32768  
SF 400.1300096 MHz  
WDW EM  
SSB 0  
LB 0.30 Hz  
GB 0  
PC 1.00

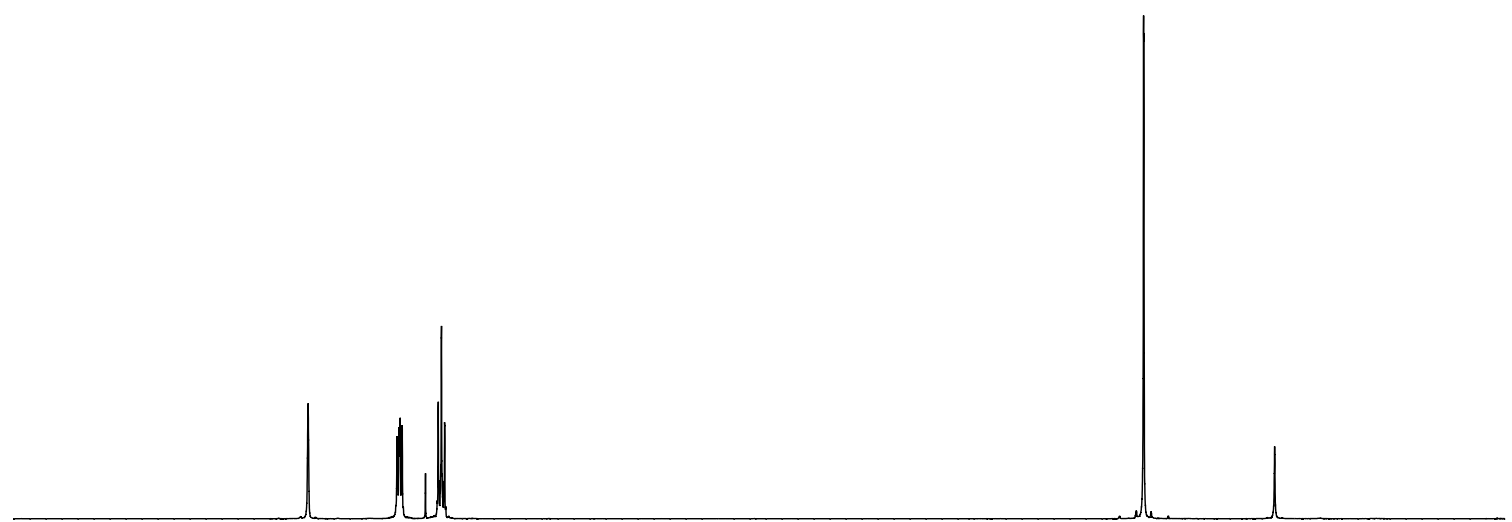

9 8 7 6 5 4 3 2 1 ppm

0.98

2.06

2.06

3.00

KL07  
C13CPD CDC13 {E:\NMR Data} skl 15

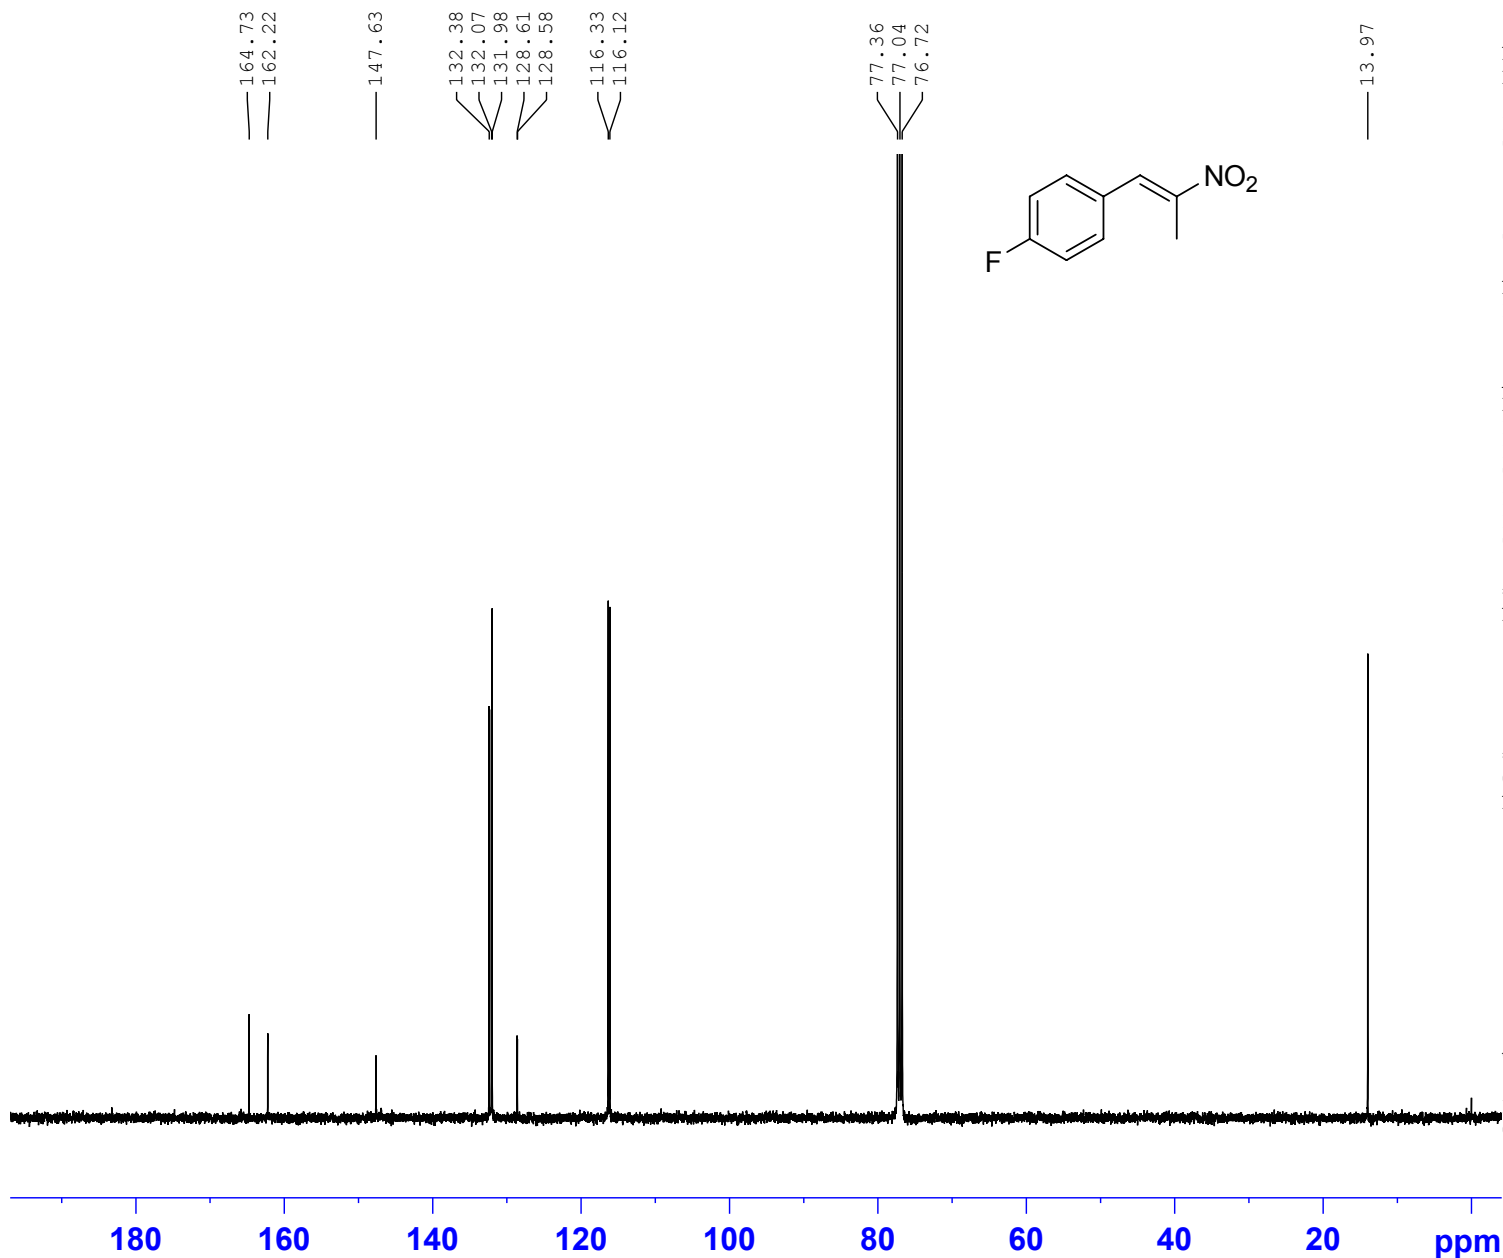

NAME Jul16-2012  
EXPNO 16  
PROCNO 1  
Date\_ 20120717  
Time\_ 1.47  
INSTRUM spect  
PROBHD 5 mm PABBO BB-  
PULPROG zgpg30  
TD 65536  
SOLVENT CDC13  
NS 2048  
DS 4  
SWH 24038.461 Hz  
FIDRES 0.366798 Hz  
AQ 1.3631988 sec  
RG 2050  
DW 20.800 usec  
DE 6.50 usec  
TE 306.1 K  
D1 2.00000000 sec  
D11 0.03000000 sec  
TD0 1

===== CHANNEL f1 =====  
NUC1 13C  
P1 8.50 usec  
PL1 1.00 dB  
PL1W 75.02186584 W  
SFO1 100.6228298 MHz

===== CHANNEL f2 =====  
CPDPRG2 waltz16  
NUC2 1H  
PCPD2 90.00 usec  
PL2 -2.00 dB  
PL12 18.23 dB  
PL13 19.00 dB  
PL2W 31.17179108 W  
PL12W 0.29563907 W  
PL13W 0.24760634 W  
SFO2 400.1316005 MHz  
SI 32768  
SF 100.6127643 MHz  
WDW EM  
SSB 0  
LB 1.00 Hz  
GB 0  
PC 1.40

KL07  
f19cpd.medchem CDC13 {E:\NMR Data} skl 15

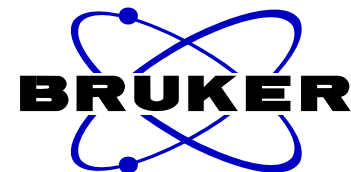

NAME Jul16-2012  
EXPNO 17  
PROCNO 1  
Date\_ 20120717  
Time\_ 10.05  
INSTRUM spect  
PROBHD 5 mm PABBO BB-  
PULPROG zgdc60  
TD 131072  
SOLVENT CDC13  
NS 128  
DS 4  
SWH 93750.000 Hz  
FIDRES 0.715256 Hz  
AQ 0.6991007 sec  
RG 1030  
DW 5.333 usec  
DE 6.50 usec  
TE 304.7 K  
D1 3.00000000 sec  
D11 0.03000000 sec  
TD0 1

===== CHANNEL f1 =====  
NUC1 19F  
P1 14.00 usec  
PL1 1.50 dB  
PL1W 35.56558990 W  
SFO1 376.4569512 MHz

===== CHANNEL f2 =====  
CPDPRG2 waltz16  
NUC2 1H  
PCPD2 90.00 usec  
PL2 -2.00 dB  
PL12 18.23 dB  
PL2W 31.17179108 W  
PL12W 0.29563907 W  
SFO2 400.1316005 MHz  
SI 65536  
SF 376.4983660 MHz  
WDW EM  
SSB 0  
LB 0.87 Hz  
GB 0  
PC 1.00

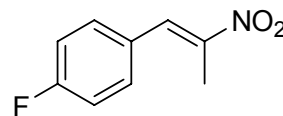

-109.41

0 -20 -40 -60 -80 -100 -120 -140 -160 -180 -200 ppm

KL09  
PROTON CDC13 {E:\NMR Data} skl 45



8.0204  
7.4444  
7.4397  
7.4279  
7.4230  
7.3783  
7.3570

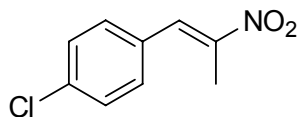

2.4355  
2.4334

NAME Jul17-2012  
EXPNO 10  
PROCNO 1  
Date\_ 20120718  
Time\_ 0.08  
INSTRUM spect  
PROBHD 5 mm PABBO BB-  
PULPROG zg30  
TD 65536  
SOLVENT CDC13  
NS 44  
DS 2  
SWH 8223.685 Hz  
FIDRES 0.125483 Hz  
AQ 3.9846387 sec  
RG 228  
DW 60.800 usec  
DE 6.50 usec  
TE 304.8 K  
D1 1.00000000 sec  
TD0 1

==== CHANNEL f1 =====  
NUC1 1H  
P1 8.76 usec  
PL1 -2.00 dB  
PL1W 31.17179108 W  
SFO1 400.1324710 MHz  
SI 32768  
SF 400.1300086 MHz  
WDW EM  
SSB 0  
LB 0.30 Hz  
GB 0  
PC 1.00

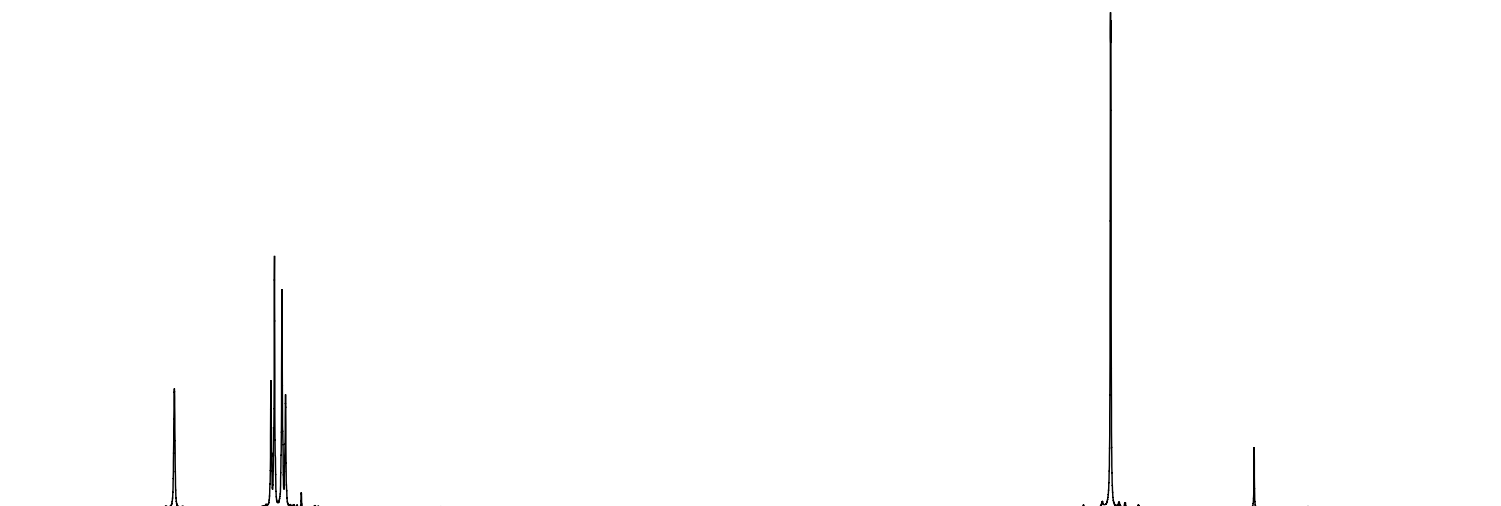

8.5 8.0 7.5 7.0 6.5 6.0 5.5 5.0 4.5 4.0 3.5 3.0 2.5 2.0 1.5 1.0 ppm

0.96

2.02  
2.05

3.00

KL09  
C13CPD CDC13 {E:\NMR Data} skl 45



NAME Jul17-2012  
EXPNO 12  
PROCNO 1  
Date\_ 20120718  
Time\_ 3.07  
INSTRUM spect  
PROBHD 5 mm PABBO BB-  
PULPROG zgpg30  
TD 65536  
SOLVENT CDC13  
NS 2048  
DS 4  
SWH 24038.461 Hz  
FIDRES 0.366798 Hz  
AQ 1.3631988 sec  
RG 2050  
DW 20.800 usec  
DE 6.50 usec  
TE 306.0 K  
D1 2.00000000 sec  
D11 0.03000000 sec  
TD0 1

===== CHANNEL f1 =====  
NUC1 13C  
P1 8.50 usec  
PL1 1.00 dB  
PL1W 75.02186584 W  
SFO1 100.6228298 MHz

===== CHANNEL f2 =====  
CPDPRG2 waltz16  
NUC2 1H  
PCPD2 90.00 usec  
PL2 -2.00 dB  
PL12 18.23 dB  
PL13 19.00 dB  
PL2W 31.17179108 W  
PL12W 0.29563907 W  
PL13W 0.24760634 W  
SFO2 400.1316005 MHz  
SI 32768  
SF 100.6127690 MHz  
WDW EM  
SSB 0  
LB 1.00 Hz  
GB 0  
PC 1.40

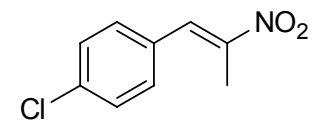

148.14  
136.08  
132.14  
131.15  
130.88  
129.24

77.34  
77.02  
76.70

13.97

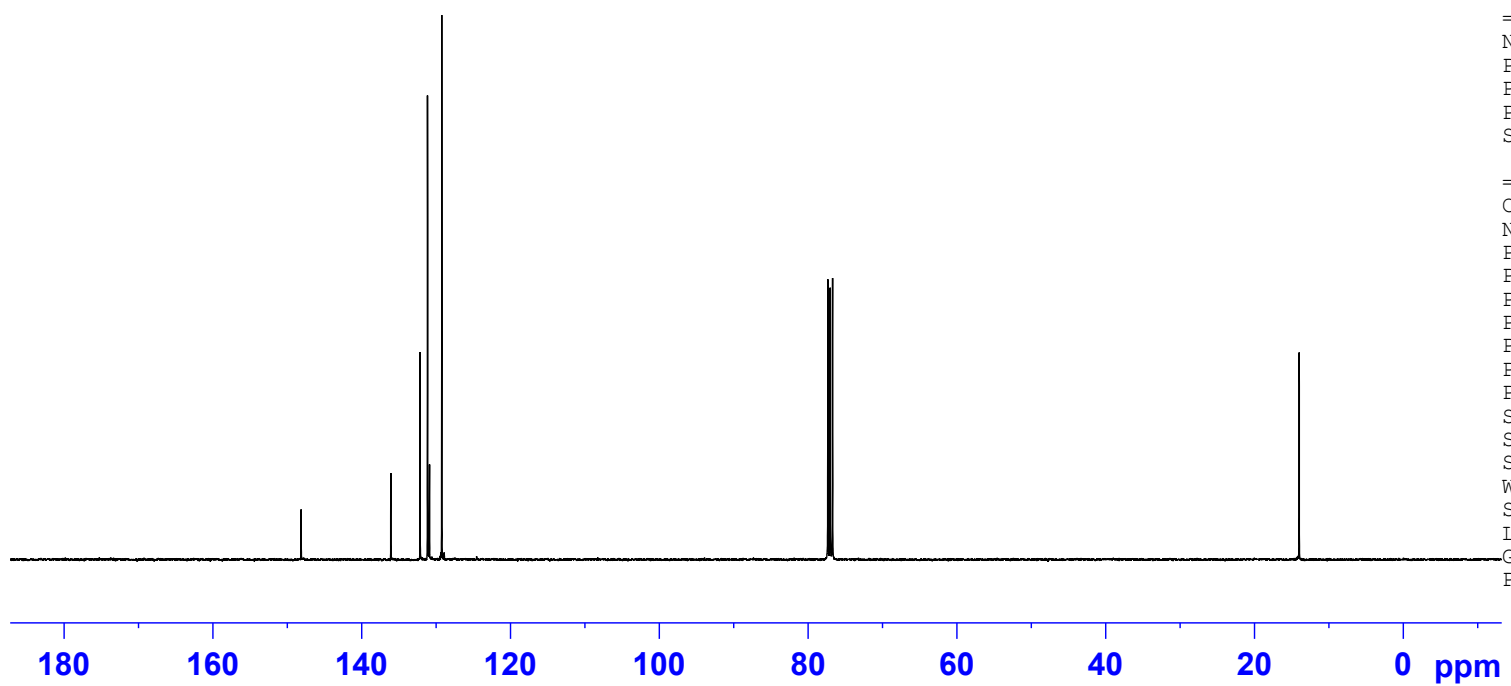

KL12  
PROTON CDC13 {E:\NMR Data} skl 44



NAME Jul19-2012  
EXPNO 14  
PROCNO 1  
Date\_ 20120720  
Time\_ 10.47  
INSTRUM spect  
PROBHD 5 mm PABBO BB-  
PULPROG zg30  
TD 65536  
SOLVENT CDC13  
NS 16  
DS 2  
SWH 8223.685 Hz  
FIDRES 0.125483 Hz  
AQ 3.9846387 sec  
RG 45.2  
DW 60.800 usec  
DE 6.50 usec  
TE 301.7 K  
D1 1.00000000 sec  
TD0 1

===== CHANNEL f1 =====  
NUC1 1H  
P1 8.76 usec  
PL1 -2.00 dB  
PL1W 31.17179108 W  
SFO1 400.1324710 MHz  
SI 32768  
SF 400.1300141 MHz  
WDW EM  
SSB 0  
LB 0.30 Hz  
GB 0  
PC 1.00

8.0367  
7.3356  
7.3152  
7.2593  
7.2390

2.4322  
2.3882

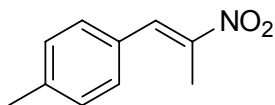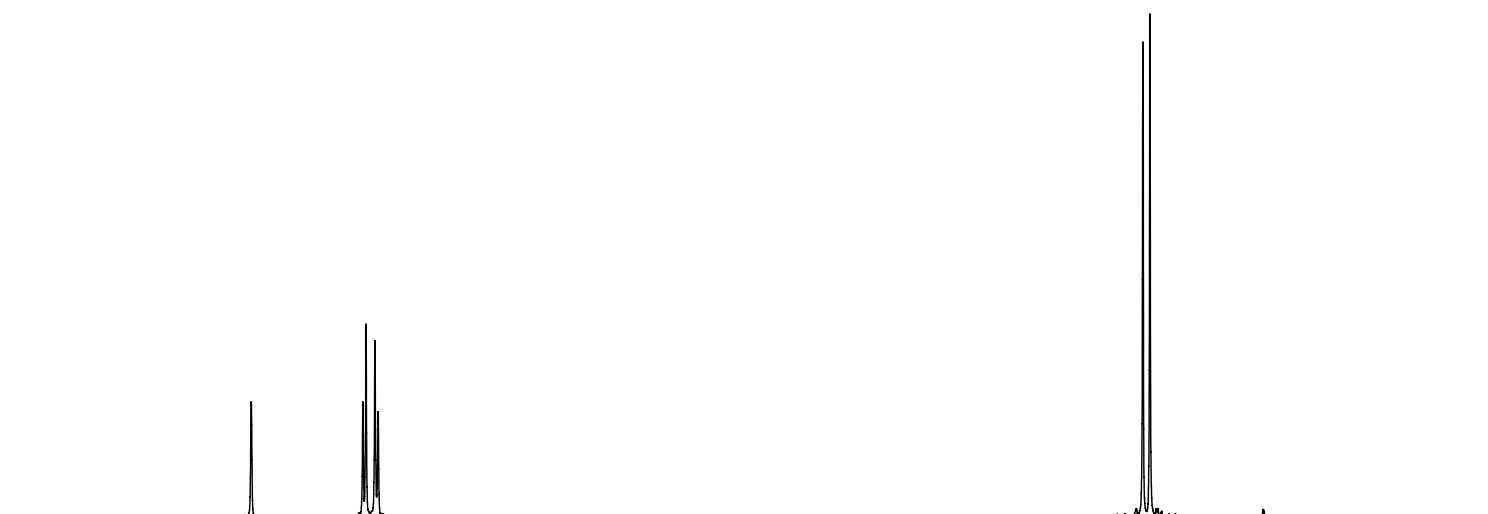

9.0 8.5 8.0 7.5 7.0 6.5 6.0 5.5 5.0 4.5 4.0 3.5 3.0 2.5 2.0 1.5 1.0 ppm

0.96  
2.02  
2.03  
3.00  
3.03

KL12  
 C13CPD CDC13 {E:\NMR Data} skl 44



145.94  
 139.48  
 132.58  
 129.08  
 128.63  
 128.50

76.41  
 76.09  
 75.78

20.37  
 12.99

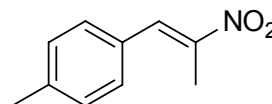

NAME Jul19-2012  
 EXPNO 10  
 PROCNO 1  
 Date\_ 20120720  
 Time\_ 5.52  
 INSTRUM spect  
 PROBHD 5 mm PABBO BB-  
 PULPROG zgpg30  
 TD 65536  
 SOLVENT CDC13  
 NS 2048  
 DS 4  
 SWH 24038.461 Hz  
 FIDRES 0.366798 Hz  
 AQ 1.3631988 sec  
 RG 2050  
 DW 20.800 usec  
 DE 6.50 usec  
 TE 303.5 K  
 D1 2.00000000 sec  
 D11 0.03000000 sec  
 TD0 1

===== CHANNEL f1 =====  
 NUC1 13C  
 P1 8.50 usec  
 PL1 1.00 dB  
 PL1W 75.02186584 W  
 SFO1 100.6228298 MHz

===== CHANNEL f2 =====  
 CPDPRG2 waltz16  
 NUC2 1H  
 PCPD2 90.00 usec  
 PL2 -2.00 dB  
 PL12 18.23 dB  
 PL13 19.00 dB  
 PL2W 31.17179108 W  
 PL12W 0.29563907 W  
 PL13W 0.24760634 W  
 SFO2 400.1316005 MHz  
 SI 32768  
 SF 100.6128736 MHz  
 WDW EM  
 SSB 0  
 LB 1.00 Hz  
 GB 0  
 PC 1.40

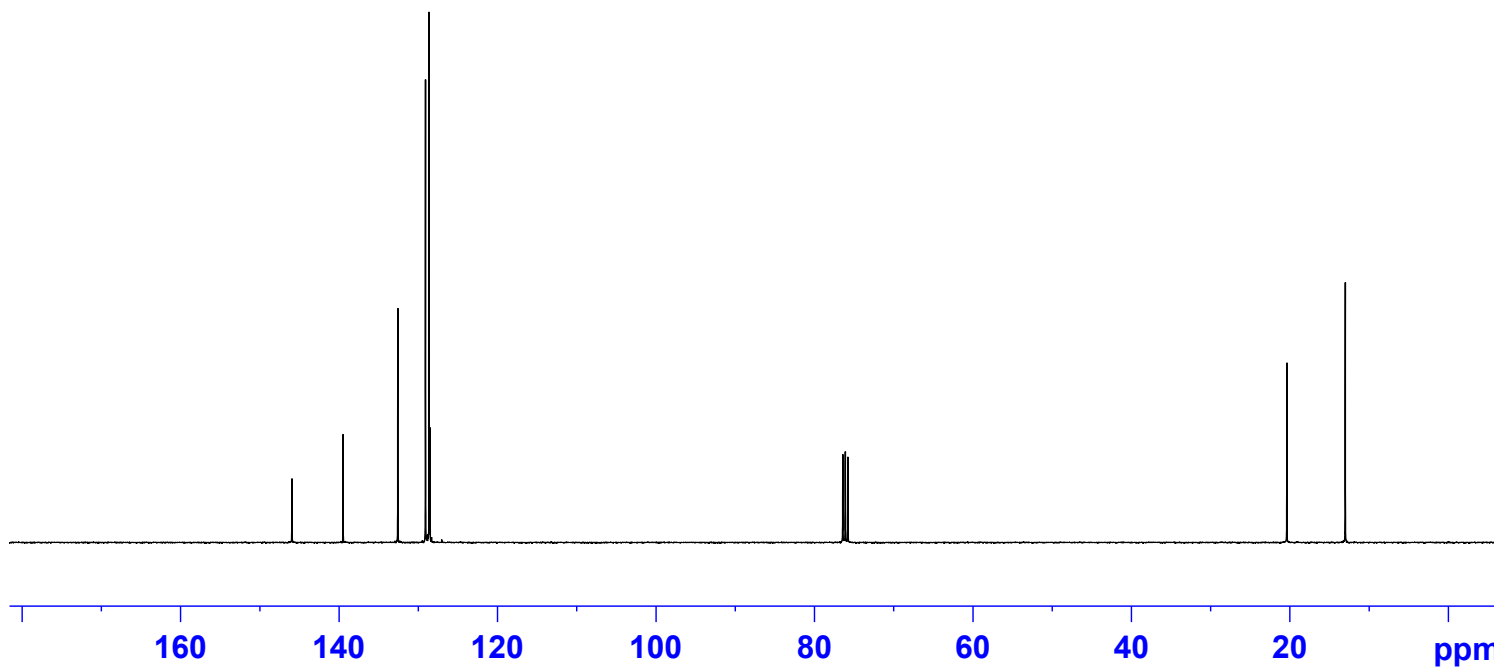



KL13  
PROTON CDC13 {E:\NMR Data} skl 45

8.0011  
7.6085  
7.6025  
7.5980  
7.5860  
7.5813  
7.5753  
7.3133  
7.3081  
7.2871  
7.2632

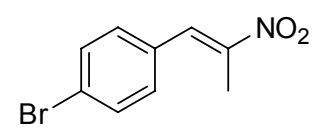

2.4287  
2.4263

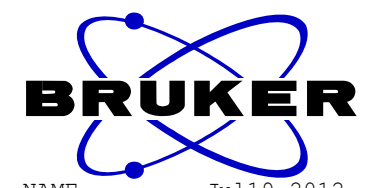

NAME Jul19-2012  
EXPNO 11  
PROCNO 1  
Date\_ 20120720  
Time\_ 6.01  
INSTRUM spect  
PROBHD 5 mm PABBO BB-  
PULPROG zg30  
TD 65536  
SOLVENT CDC13  
NS 44  
DS 2  
SWH 8223.685 Hz  
FIDRES 0.125483 Hz  
AQ 3.9846387 sec  
RG 256  
DW 60.800 usec  
DE 6.50 usec  
TE 302.1 K  
D1 1.00000000 sec  
TD0 1

===== CHANNEL f1 =====  
NUC1 1H  
P1 8.76 usec  
PL1 -2.00 dB  
PL1W 31.17179108 W  
SFO1 400.1324710 MHz  
SI 32768  
SF 400.1300086 MHz  
WDW EM  
SSB 0  
LB 0.30 Hz  
GB 0  
PC 1.00

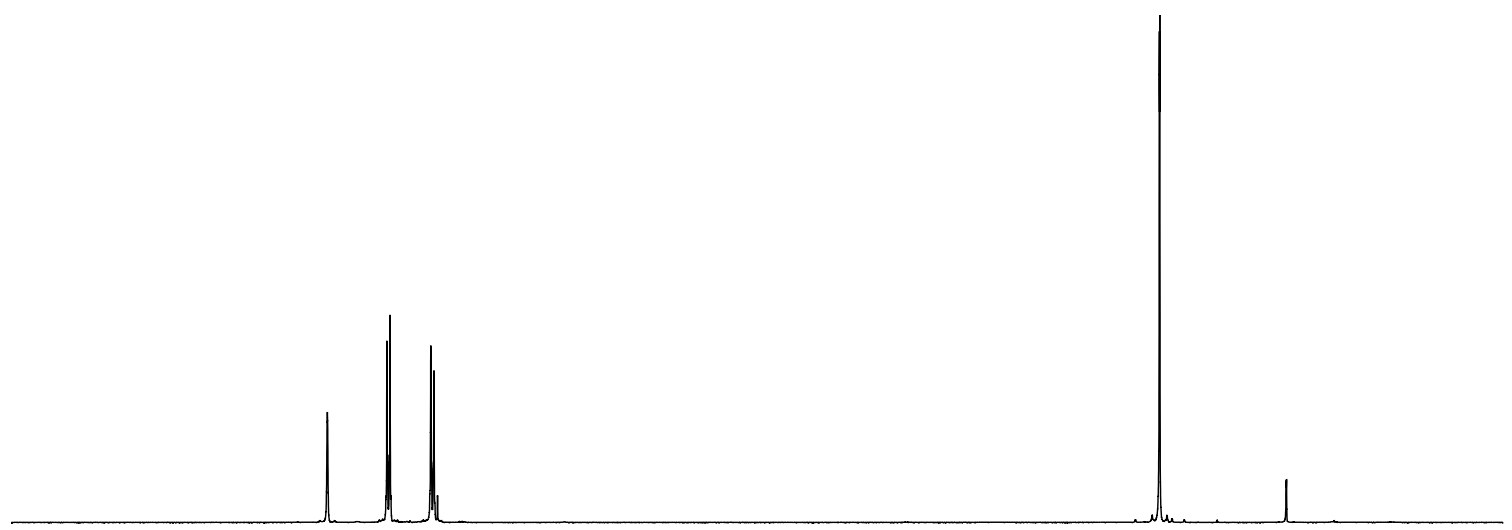

9 8 7 6 5 4 3 2 1 ppm

0.98  
2.00  
2.03

3.00

KL13(R)  
C13CPD32 CDC13 {E:\NMR Data} skl 1



NAME Aug02-2012  
EXPNO 3  
PROCNO 1  
Date\_ 20120803  
Time\_ 2.46  
INSTRUM spect  
PROBHD 5 mm PABBO BB-  
PULPROG zgpg30  
TD 65536  
SOLVENT CDC13  
NS 1024  
DS 2  
SWH 24038.461 Hz  
FIDRES 0.366798 Hz  
AQ 1.3631988 sec  
RG 2050  
DW 20.800 usec  
DE 6.50 usec  
TE 303.3 K  
D1 2.00000000 sec  
D11 0.03000000 sec  
TD0 1

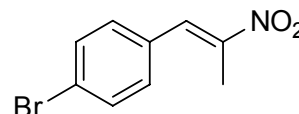

148.19  
132.20  
132.18  
131.41  
131.34  
124.36  
77.50  
77.18  
76.86  
14.00

==== CHANNEL f1 =====  
NUC1 13C  
P1 8.50 usec  
PL1 1.00 dB  
PL1W 75.02186584 W  
SFO1 100.6228298 MHz

==== CHANNEL f2 =====  
CPDPRG2 waltz16  
NUC2 1H  
PCPD2 90.00 usec  
PL2 -2.00 dB  
PL12 18.23 dB  
PL13 19.00 dB  
PL2W 31.17179108 W  
PL12W 0.29563907 W  
PL13W 0.24760634 W  
SFO2 400.1316005 MHz  
SI 32768  
SF 100.6127690 MHz  
WDW EM  
SSB 0  
LB 1.00 Hz  
GB 0  
PC 1.40

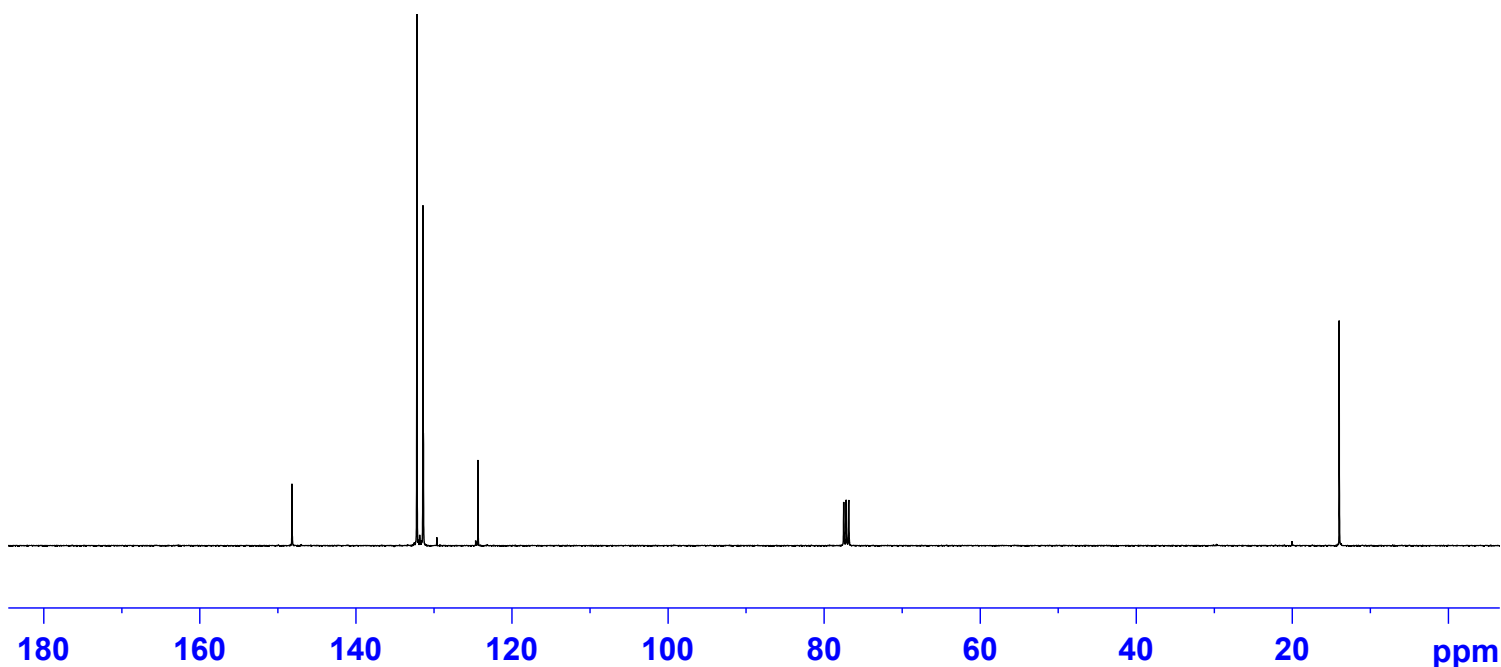

KL17  
PROTON CDCl3 {E:\NMR Data} skl 3

8.3342  
8.3124  
8.0935  
7.6213  
7.5997  
7.2762

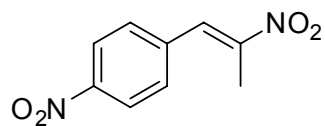

2.4667



NAME Jul21-2012  
EXPNO 3  
PROCNO 1  
Date\_ 20120721  
Time\_ 21.24  
INSTRUM spect  
PROBHD 5 mm PABBO BB-  
PULPROG zg30  
TD 65536  
SOLVENT CDCl3  
NS 44  
DS 2  
SWH 8223.685 Hz  
FIDRES 0.125483 Hz  
AQ 3.9846387 sec  
RG 228  
DW 60.800 usec  
DE 6.50 usec  
TE 299.9 K  
D1 1.00000000 sec  
TD0 1

===== CHANNEL f1 =====  
NUC1 1H  
P1 8.76 usec  
PL1 -2.00 dB  
PL1W 31.17179108 W  
SFO1 400.1324710 MHz  
SI 32768  
SF 400.1300035 MHz  
WDW EM  
SSB 0  
LB 0.30 Hz  
GB 0  
PC 1.00

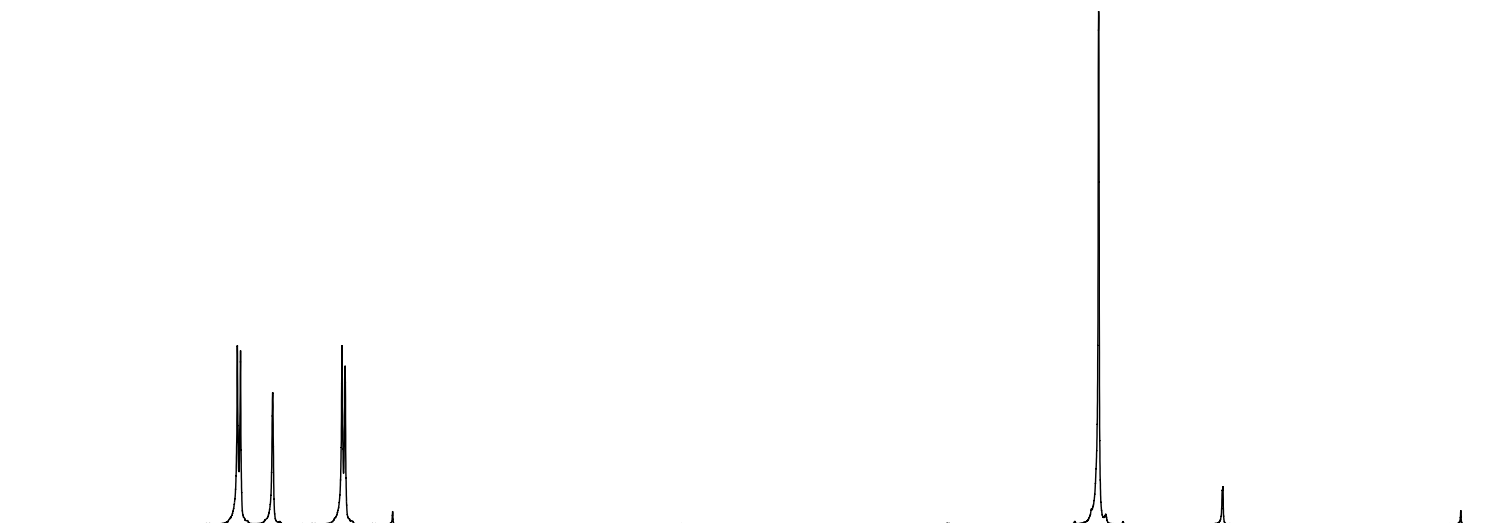

9.5 9.0 8.5 8.0 7.5 7.0 6.5 6.0 5.5 5.0 4.5 4.0 3.5 3.0 2.5 2.0 1.5 1.0 0.5 ppm

2.07  
0.99  
2.08  
3.00

KL17  
C13CPD CDC13 {E:\NMR Data} skl 3

150.2645  
148.1604  
138.8692  
130.7325  
130.5243  
124.0532

77.3604  
77.0429  
76.7250

14.0432

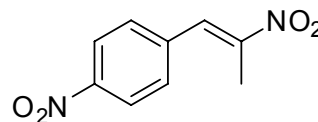

NAME Jul21-2012  
EXPNO 9  
PROCNO 1  
Date\_ 20120722  
Time\_ 2.10  
INSTRUM spect  
PROBHD 5 mm PABBO BB-  
PULPROG zgpg30  
TD 65536  
SOLVENT CDC13  
NS 1024  
DS 4  
SWH 24038.461 Hz  
FIDRES 0.366798 Hz  
AQ 1.3631988 sec  
RG 2050  
DW 20.800 usec  
DE 6.50 usec  
TE 301.6 K  
D1 2.00000000 sec  
D11 0.03000000 sec  
TD0 1

===== CHANNEL f1 =====  
NUC1 13C  
P1 8.50 usec  
PL1 1.00 dB  
PL1W 75.02186584 W  
SFO1 100.6228298 MHz

===== CHANNEL f2 =====  
CPDPRG2 waltz16  
NUC2 1H  
PCPD2 90.00 usec  
PL2 -2.00 dB  
PL12 18.23 dB  
PL13 19.00 dB  
PL2W 31.17179108 W  
PL12W 0.29563907 W  
PL13W 0.24760634 W  
SFO2 400.1316005 MHz  
SI 32768  
SF 100.6127690 MHz  
WDW EM  
SSB 0  
LB 1.00 Hz  
GB 0  
PC 1.40

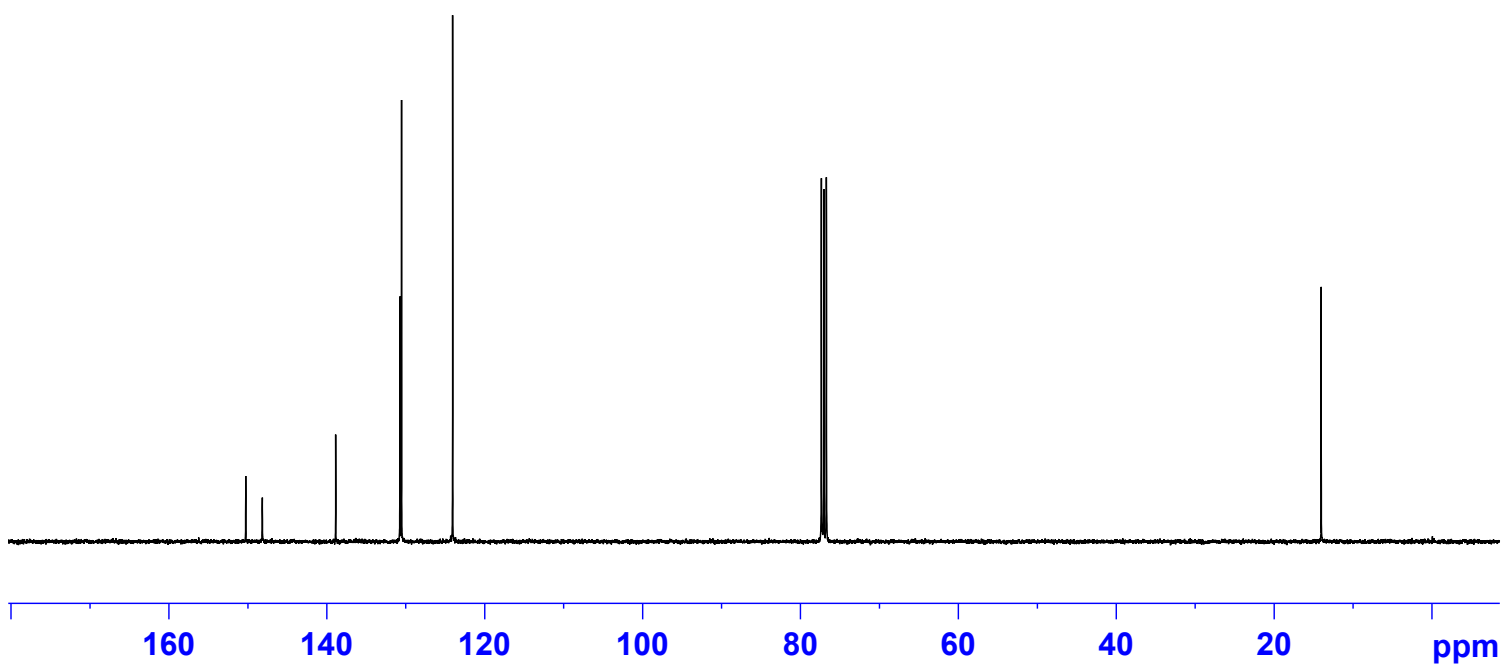

KL10  
PROTON CDC13 {E:\NMR Data} skl 27



8.1651  
7.4930  
7.4860  
7.4783  
7.4676  
7.4639  
7.4577  
7.3865  
7.3784  
7.3757  
7.3704  
7.3660  
7.3579  
7.3522  
7.3416  
7.3357

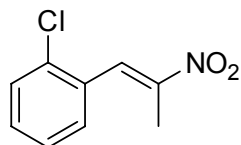

2.3369  
2.3343

NAME Jul18-2012  
EXPNO 1  
PROCNO 1  
Date\_ 20120718  
Time\_ 17.14  
INSTRUM spect  
PROBHD 5 mm PABBO BB-  
PULPROG zg30  
TD 65536  
SOLVENT CDC13  
NS 44  
DS 2  
SWH 8223.685 Hz  
FIDRES 0.125483 Hz  
AQ 3.9846387 sec  
RG 57  
DW 60.800 usec  
DE 6.50 usec  
TE 304.6 K  
D1 1.00000000 sec  
TD0 1

===== CHANNEL f1 =====  
NUC1 1H  
P1 8.76 usec  
PL1 -2.00 dB  
PL1W 31.17179108 W  
SFO1 400.1324710 MHz  
SI 32768  
SF 400.1300051 MHz  
WDW EM  
SSB 0  
LB 0.30 Hz  
GB 0  
PC 1.00

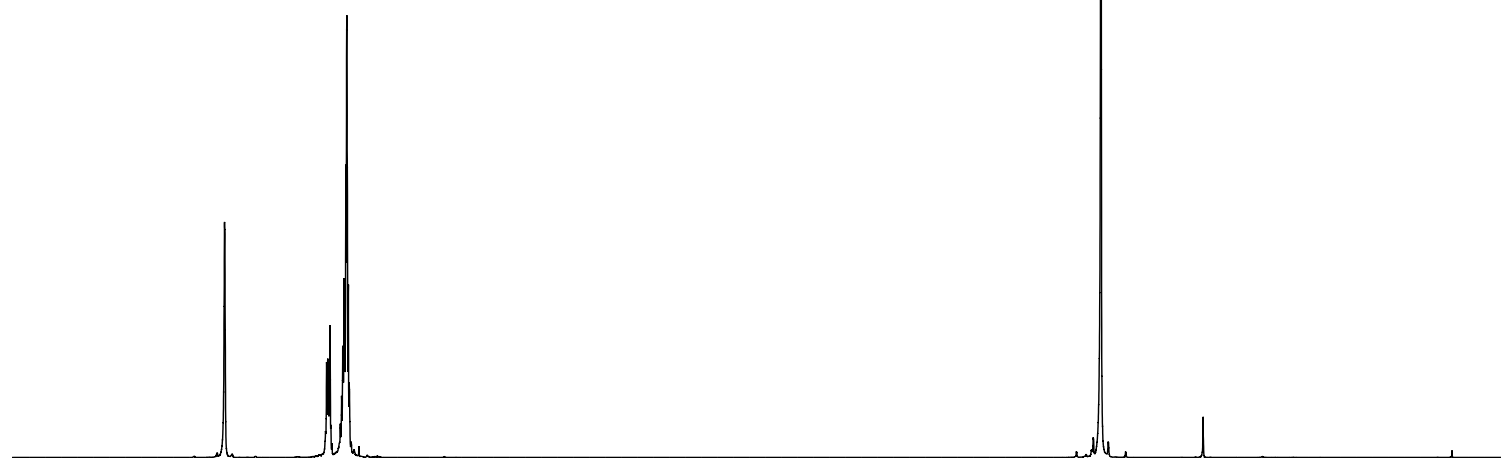

9.0 8.5 8.0 7.5 7.0 6.5 6.0 5.5 5.0 4.5 4.0 3.5 3.0 2.5 2.0 1.5 1.0 0.5 ppm

0.95

1.00  
3.09

3.00

KL10  
C13CPD CDC13 {E:\NMR Data} skl 27



NAME Jul18-2012  
EXPNO 4  
PROCNO 1  
Date\_ 20120718  
Time\_ 20.16  
INSTRUM spect  
PROBHD 5 mm PABBO BB-  
PULPROG zgpg30  
TD 65536  
SOLVENT CDC13  
NS 1024  
DS 4  
SWH 24038.461 Hz  
FIDRES 0.366798 Hz  
AQ 1.3631988 sec  
RG 2050  
DW 20.800 usec  
DE 6.50 usec  
TE 306.4 K  
D1 2.00000000 sec  
D11 0.03000000 sec  
TD0 1

===== CHANNEL f1 =====  
NUC1 13C  
P1 8.50 usec  
PL1 1.00 dB  
PL1W 75.02186584 W  
SFO1 100.6228298 MHz

===== CHANNEL f2 =====  
CPDPRG2 waltz16  
NUC2 1H  
PCPD2 90.00 usec  
PL2 -2.00 dB  
PL12 18.23 dB  
PL13 19.00 dB  
PL2W 31.17179108 W  
PL12W 0.29563907 W  
PL13W 0.24760634 W  
SFO2 400.1316005 MHz  
SI 32768  
SF 100.6127690 MHz  
WDW EM  
SSB 0  
LB 1.00 Hz  
GB 0  
PC 1.40

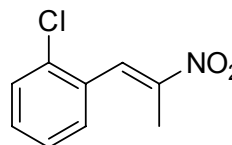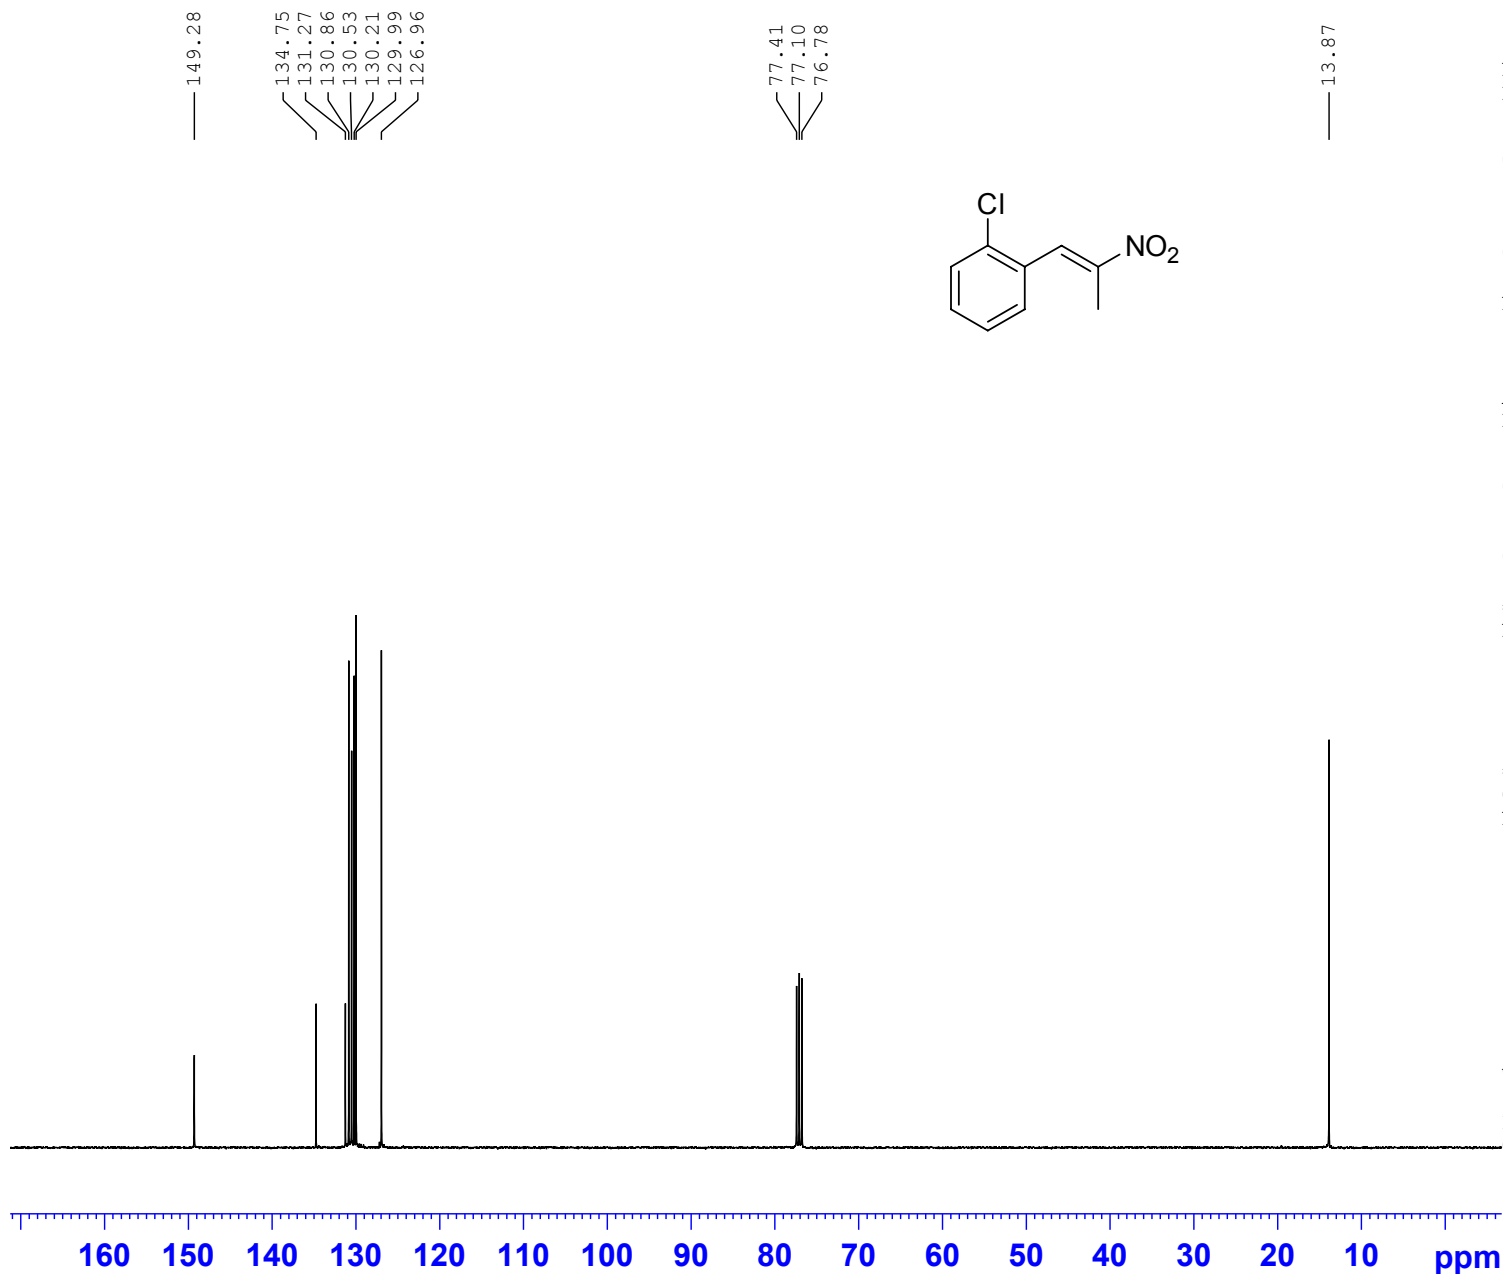

KL21  
PROTON CDCl3 {E:\NMR Data} skl 44

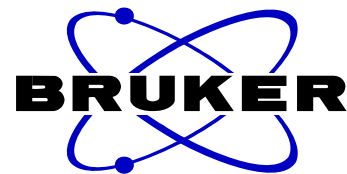

NAME Jul24-2012  
EXPNO 4  
PROCNO 1  
Date\_ 20120725  
Time\_ 1.15  
INSTRUM spect  
PROBHD 5 mm PABBO BB-  
PULPROG zg30  
TD 65536  
SOLVENT CDCl3  
NS 44  
DS 2  
SWH 8223.685 Hz  
FIDRES 0.125483 Hz  
AQ 3.9846387 sec  
RG 57  
DW 60.800 usec  
DE 6.50 usec  
TE 302.7 K  
D1 1.00000000 sec  
TD0 1

===== CHANNEL f1 =====  
NUC1 1H  
P1 8.76 usec  
PL1 -2.00 dB  
PL1W 31.17179108 W  
SFO1 400.1324710 MHz  
SI 32768  
SF 400.1300262 MHz  
WDW EM  
SSB 0  
LB 0.30 Hz  
GB 0  
PC 1.00

8.1726  
7.8611  
7.8390  
7.8199  
7.5514  
7.5388  
7.5333  
7.5241  
7.5149  
7.5098  
7.4965  
7.4925  
7.4600  
7.4565  
7.4386  
7.4355

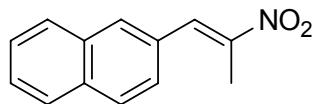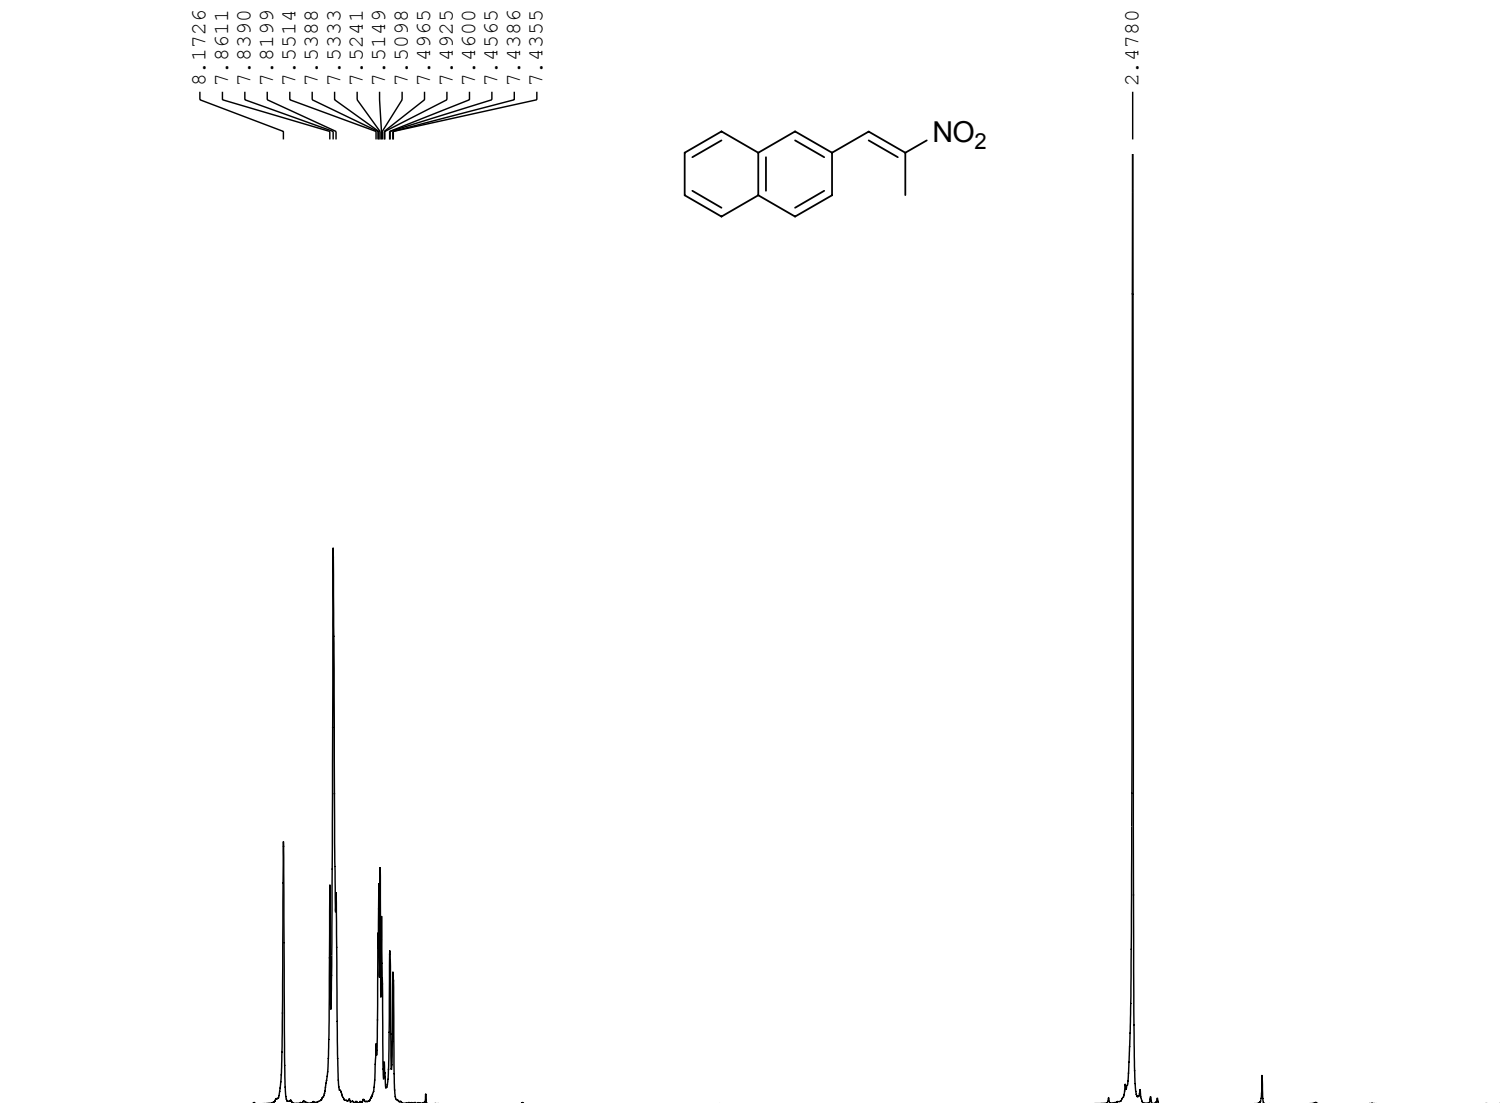

9 8 7 6 5 4 3 2 1 ppm

0.98  
4.14  
2.04  
1.03

3.00

KL21  
C13CPD CDC13 {E:\NMR Data} skl 44



147.82  
133.66  
133.63  
133.06  
130.61  
129.86  
128.67  
128.51  
127.81  
127.68  
126.97  
126.38

77.46  
77.14  
76.82

14.16

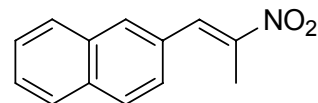

NAME Jul24-2012  
EXPNO 6  
PROCNO 1  
Date\_ 20120725  
Time\_ 4.15  
INSTRUM spect  
PROBHD 5 mm PABBO BB-  
PULPROG zgpg30  
TD 65536  
SOLVENT CDC13  
NS 2048  
DS 4  
SWH 24038.461 Hz  
FIDRES 0.366798 Hz  
AQ 1.3631988 sec  
RG 2050  
DW 20.800 usec  
DE 6.50 usec  
TE 303.8 K  
D1 2.00000000 sec  
D11 0.03000000 sec  
TD0 1

===== CHANNEL f1 =====  
NUC1 13C  
P1 8.50 usec  
PL1 1.00 dB  
PL1W 75.02186584 W  
SFO1 100.6228298 MHz

===== CHANNEL f2 =====  
CPDPRG2 waltz16  
NUC2 1H  
PCPD2 90.00 usec  
PL2 -2.00 dB  
PL12 18.23 dB  
PL13 19.00 dB  
PL2W 31.17179108 W  
PL12W 0.29563907 W  
PL13W 0.24760634 W  
SFO2 400.1316005 MHz  
SI 32768  
SF 100.6127690 MHz  
WDW EM  
SSB 0  
LB 1.00 Hz  
GB 0  
PC 1.40

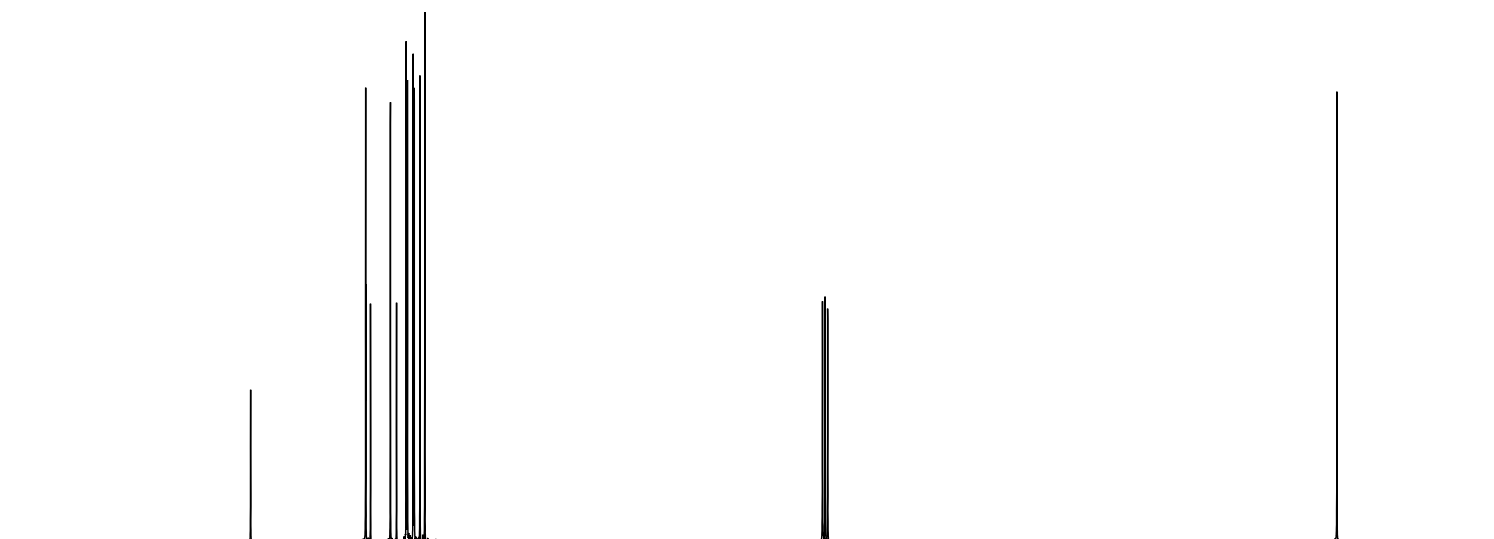

170 160 150 140 130 120 110 100 90 80 70 60 50 40 30 20 10 ppm



KL26  
PROTON CDC13 {E:\NMR Data} skl 44

7.3115  
7.3091  
7.3053  
7.2957  
7.2916  
7.2761  
7.2727  
7.2321  
7.2284  
7.2252  
7.2156  
7.2101  
7.2041  
7.1953  
7.1918  
7.1752  
7.1717  
7.1544  
7.1475  
7.1452  
7.1276  
7.1252  
7.1079  
7.1055

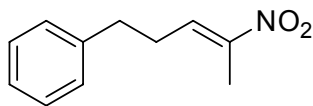

2.8190  
2.8004  
2.7816  
2.5571  
2.5386  
2.5370  
2.5191  
2.4998  
2.0292  
2.0269



NAME Aug07-2012  
EXPNO 4  
PROCNO 1  
Date\_ 20120807  
Time\_ 17.37  
INSTRUM spect  
PROBHD 5 mm PABBO BB-  
PULPROG zg30  
TD 65536  
SOLVENT CDC13  
NS 32  
DS 2  
SWH 8223.685 Hz  
FIDRES 0.125483 Hz  
AQ 3.9846387 sec  
RG 57  
DW 60.800 usec  
DE 6.50 usec  
TE 301.5 K  
D1 1.00000000 sec  
TD0 1

===== CHANNEL f1 =====  
NUC1 1H  
P1 8.76 usec  
PL1 -2.00 dB  
PL1W 31.17179108 W  
SFO1 400.1324710 MHz  
SI 32768  
SF 400.1300208 MHz  
WDW EM  
SSB 0  
LB 0.30 Hz  
GB 0  
PC 1.00

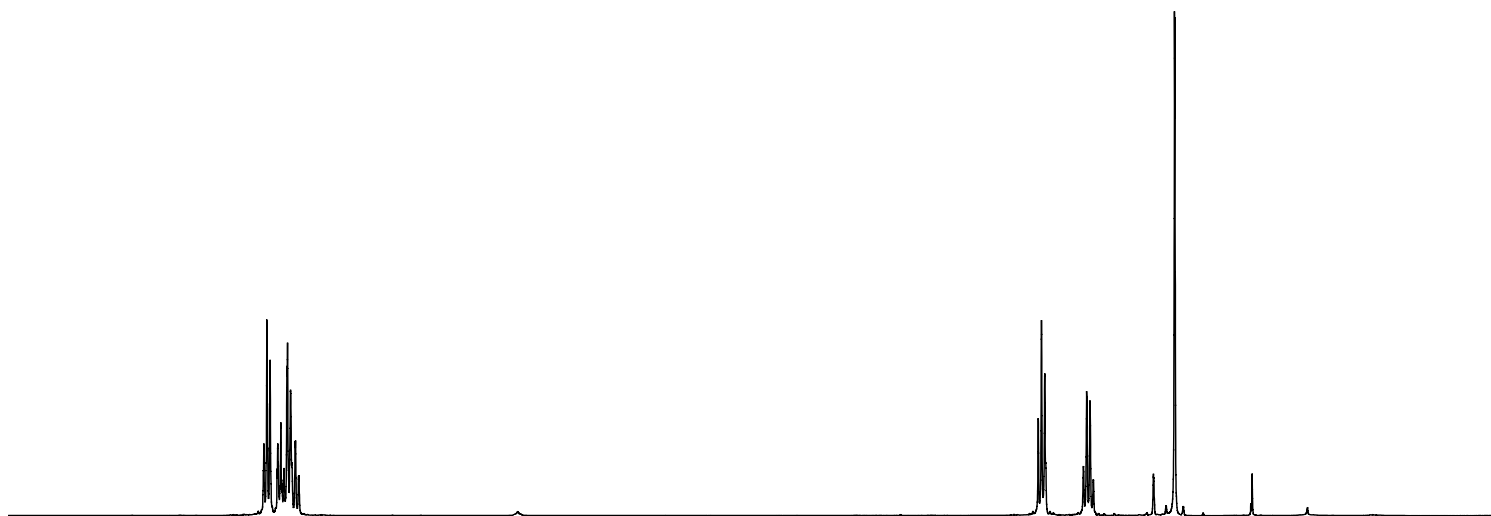

8.5 8.0 7.5 7.0 6.5 6.0 5.5 5.0 4.5 4.0 3.5 3.0 2.5 2.0 1.5 1.0 ppm

2.21  
1.06  
2.31  
1.10

2.16  
2.10  
3.00

KL26  
C13CPD32 CDCl3 {E:\NMR Data} skl 44



NAME Aug07-2012  
EXPNO 7  
PROCNO 1  
Date\_ 20120808  
Time\_ 7.30  
INSTRUM spect  
PROBHD 5 mm PABBO BB-  
PULPROG zgpg30  
TD 65536  
SOLVENT CDCl3  
NS 1024  
DS 2  
SWH 24038.461 Hz  
FIDRES 0.366798 Hz  
AQ 1.3631988 sec  
RG 2050  
DW 20.800 usec  
DE 6.50 usec  
TE 305.2 K  
D1 2.00000000 sec  
D11 0.03000000 sec  
TD0 1

===== CHANNEL f1 =====  
NUC1 13C  
P1 8.50 usec  
PL1 1.00 dB  
PL1W 75.02186584 W  
SFO1 100.6228298 MHz

===== CHANNEL f2 =====  
CPDPRG2 waltz16  
NUC2 1H  
PCPD2 90.00 usec  
PL2 -2.00 dB  
PL12 18.23 dB  
PL13 19.00 dB  
PL2W 31.17179108 W  
PL12W 0.29563907 W  
PL13W 0.24760634 W  
SFO2 400.1316005 MHz  
SI 32768  
SF 100.6127690 MHz  
WDW EM  
SSB 0  
LB 1.00 Hz  
GB 0  
PC 1.40

148.23  
140.09  
134.80  
128.66  
128.36  
126.50

77.40  
77.08  
76.77

34.36  
29.93

12.36

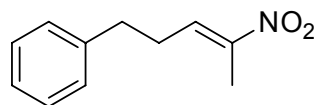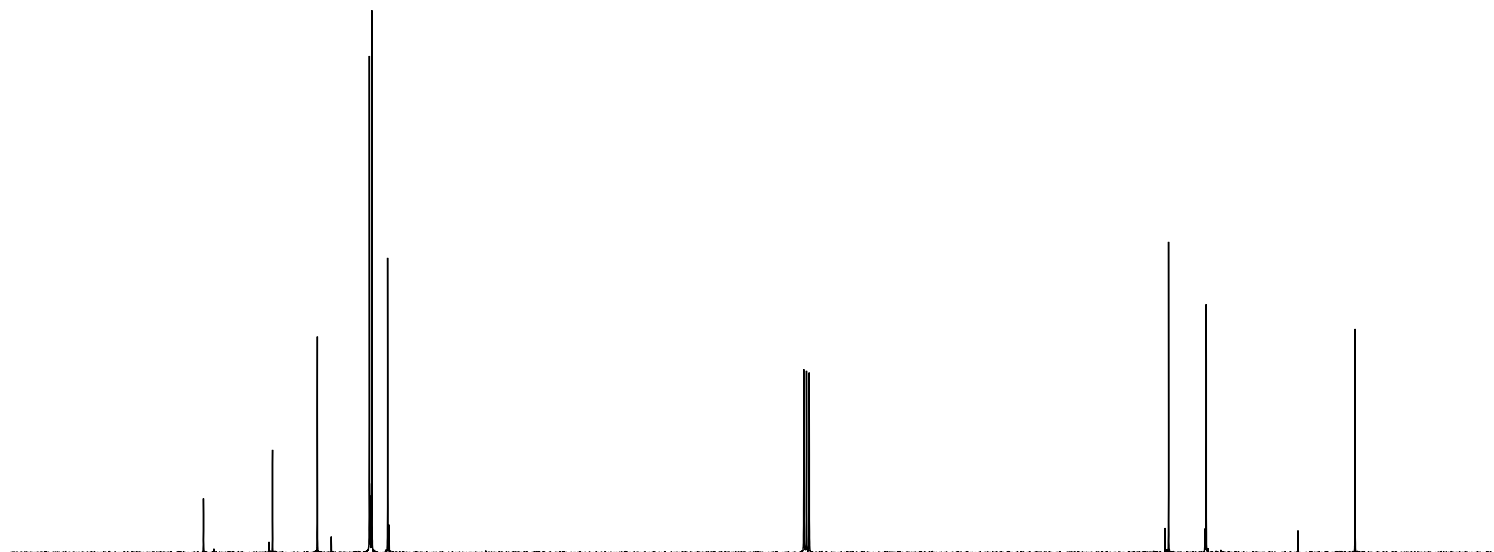

160 150 140 130 120 110 100 90 80 70 60 50 40 30 20 10 ppm

KL29  
 PROTON CDC13 {E:\NMR Data} skl 14



8.0009  
 7.4660  
 7.4550  
 7.4519  
 7.4494  
 7.4443  
 7.4413  
 7.4369  
 7.4324  
 7.4257  
 7.4167  
 7.4049  
 7.4017  
 7.3958  
 7.3905

2.8655  
 2.8470

1.2850  
 1.2665  
 1.2480

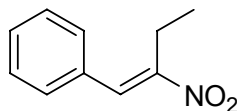

NAME Aug10-2012  
 EXPNO 8  
 PROCNO 1  
 Date\_ 20120811  
 Time\_ 15.08  
 INSTRUM spect  
 PROBHD 5 mm PABBO BB-  
 PULPROG zg30  
 TD 65536  
 SOLVENT CDC13  
 NS 16  
 DS 2  
 SWH 8223.685 Hz  
 FIDRES 0.125483 Hz  
 AQ 3.9846387 sec  
 RG 50.8  
 DW 60.800 usec  
 DE 6.50 usec  
 TE 303.5 K  
 D1 1.00000000 sec  
 TD0 1

===== CHANNEL f1 =====  
 NUC1 1H  
 P1 8.76 usec  
 PL1 -2.00 dB  
 PL1W 31.17179108 W  
 SFO1 400.1324710 MHz  
 SI 32768  
 SF 400.1300127 MHz  
 WDW EM  
 SSB 0  
 LB 0.30 Hz  
 GB 0  
 PC 1.00

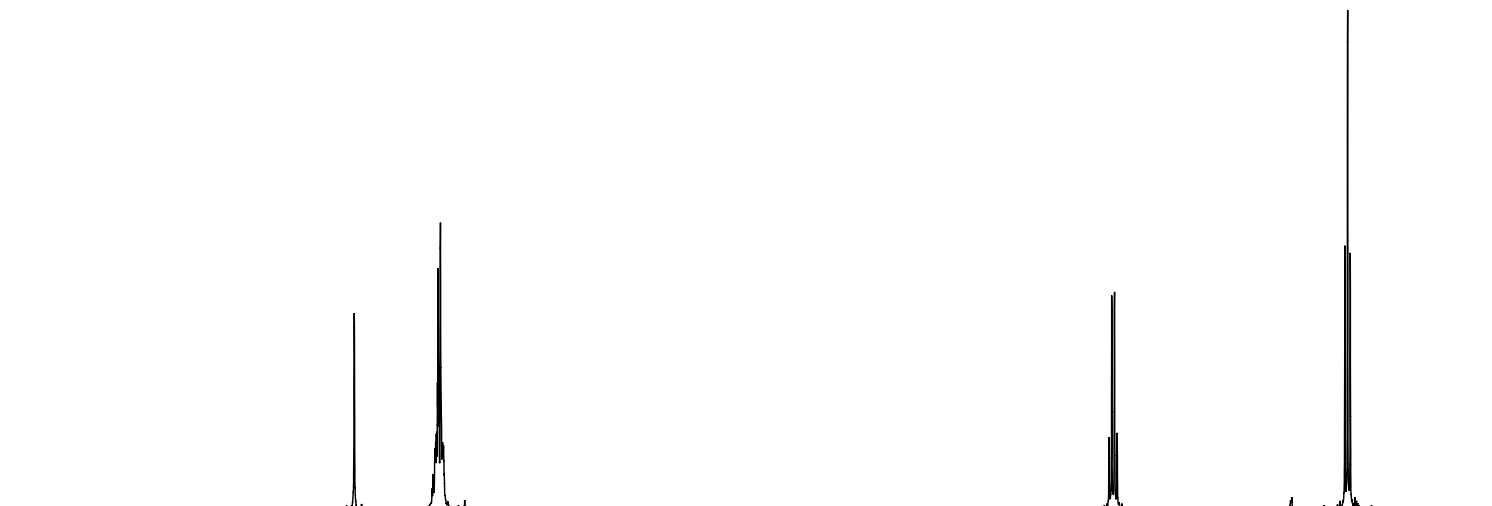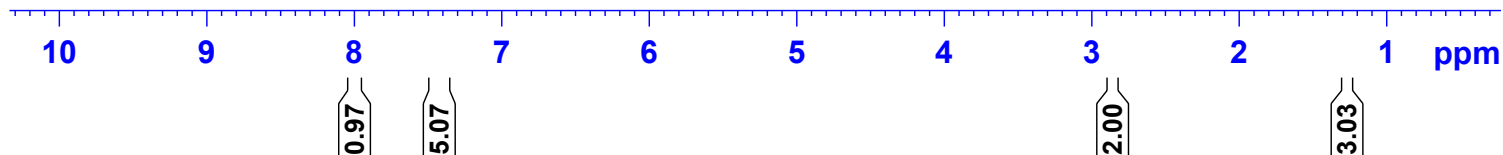

KL29  
C13CPD32 CDC13 {E:\NMR Data} skl 14



NAME Aug10-2012  
EXPNO 3  
PROCNO 1  
Date\_ 20120811  
Time\_ 3.31  
INSTRUM spect  
PROBHD 5 mm PABBO BB-  
PULPROG zgpg30  
TD 65536  
SOLVENT CDC13  
NS 1024  
DS 2  
SWH 24038.461 Hz  
FIDRES 0.366798 Hz  
AQ 1.3631988 sec  
RG 2050  
DW 20.800 usec  
DE 6.50 usec  
TE 305.3 K  
D1 2.00000000 sec  
D11 0.03000000 sec  
TD0 1

===== CHANNEL f1 =====  
NUC1 13C  
P1 8.50 usec  
PL1 1.00 dB  
PL1W 75.02186584 W  
SFO1 100.6228298 MHz

===== CHANNEL f2 =====  
CPDPRG2 waltz16  
NUC2 1H  
PCPD2 90.00 usec  
PL2 -2.00 dB  
PL12 18.23 dB  
PL13 19.00 dB  
PL2W 31.17179108 W  
PL12W 0.29563907 W  
PL13W 0.24760634 W  
SFO2 400.1316005 MHz  
SI 32768  
SF 100.6127690 MHz  
WDW EM  
SSB 0  
LB 1.00 Hz  
GB 0  
PC 1.40

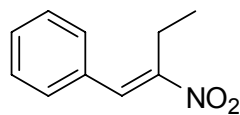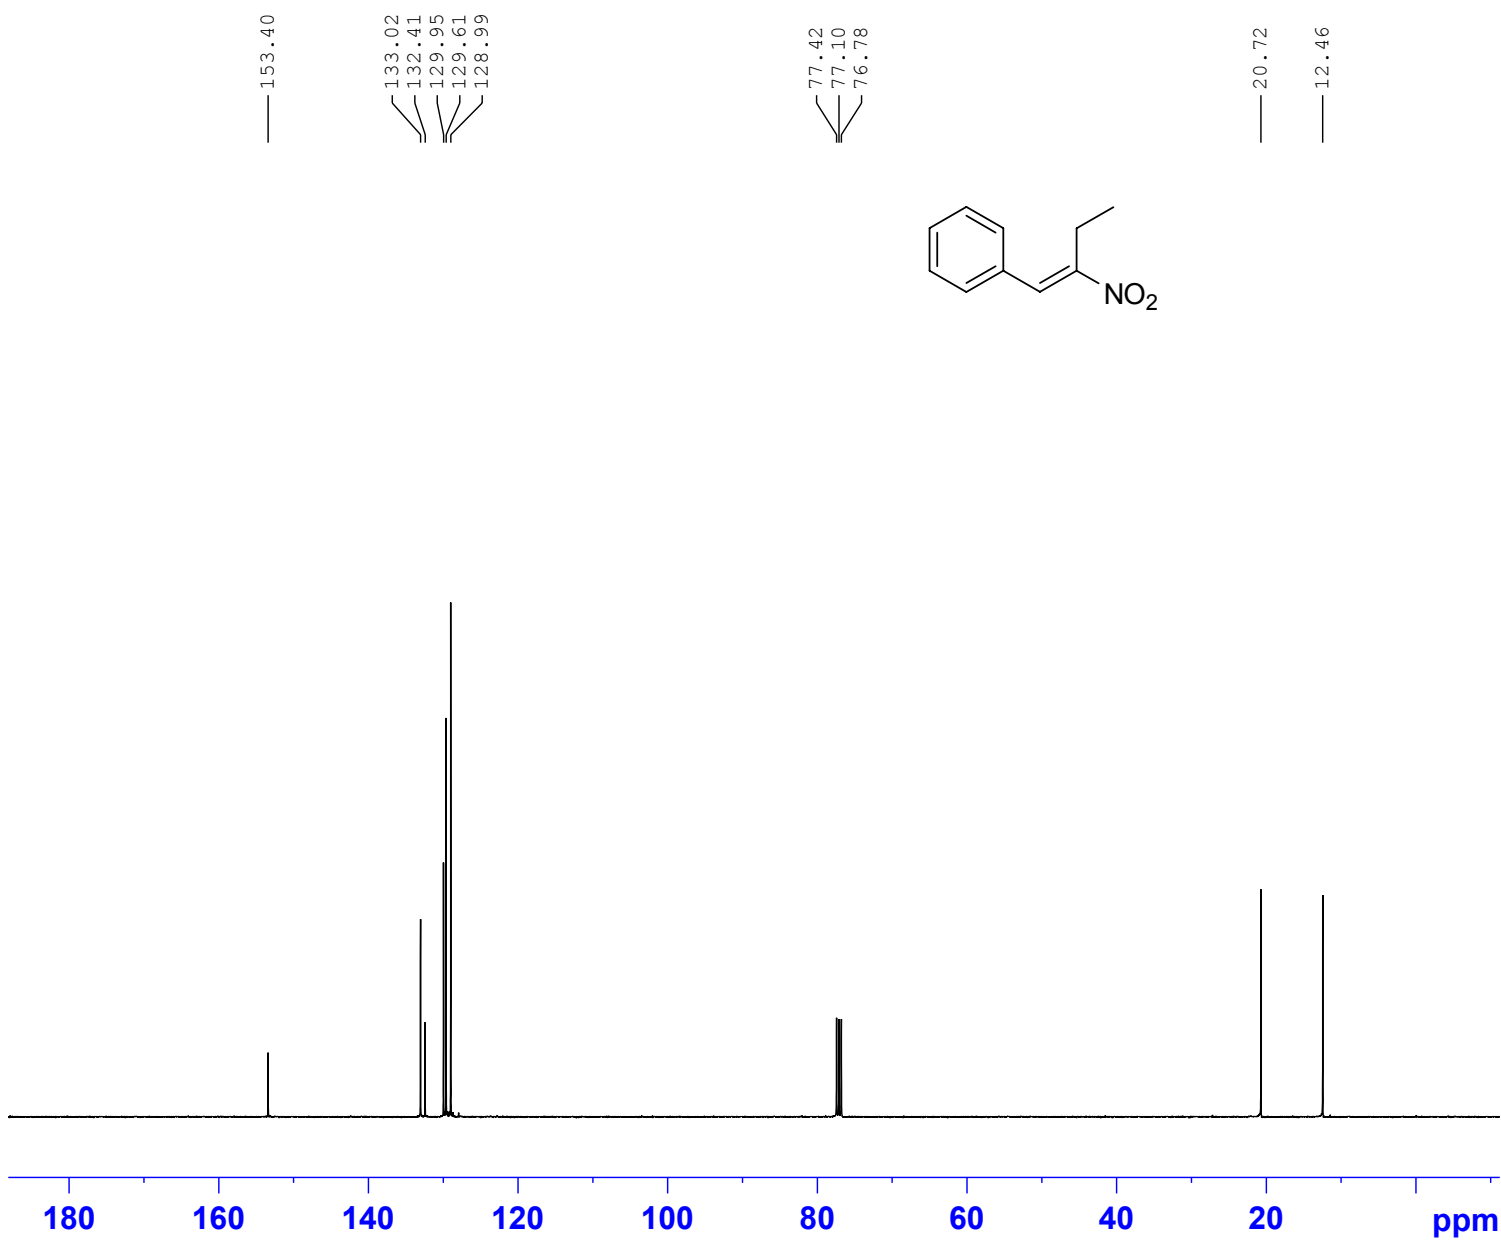

KL30  
 PROTON CDC13 {E:\NMR Data} skl 45



7.9189  
 7.4051  
 7.4018  
 7.3957  
 7.3919  
 7.3895  
 7.3862  
 7.3850  
 7.3818  
 7.3720  
 7.3693  
 7.3004  
 7.2970  
 7.2961  
 7.2934  
 7.2907  
 7.2874  
 7.2853  
 7.2822  
 7.2758  
 7.2743  
 7.2649

2.8633  
 2.8448  
 2.8263  
 2.8079

1.2850  
 1.2665  
 1.2480

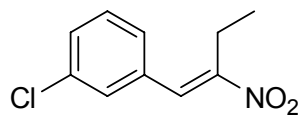

NAME Aug11-2012  
 EXPNO 6  
 PROCNO 1  
 Date\_ 20120812  
 Time\_ 3.30  
 INSTRUM spect  
 PROBHD 5 mm PABBO BB-  
 PULPROG zg30  
 TD 65536  
 SOLVENT CDC13  
 NS 32  
 DS 2  
 SWH 8223.685 Hz  
 FIDRES 0.125483 Hz  
 AQ 3.9846387 sec  
 RG 128  
 DW 60.800 usec  
 DE 6.50 usec  
 TE 304.1 K  
 D1 1.00000000 sec  
 TD0 1

===== CHANNEL f1 =====  
 NUC1 1H  
 P1 8.76 usec  
 PL1 -2.00 dB  
 PL1W 31.17179108 W  
 SFO1 400.1324710 MHz  
 SI 32768  
 SF 400.1300078 MHz  
 WDW EM  
 SSB 0  
 LB 0.30 Hz  
 GB 0  
 PC 1.00

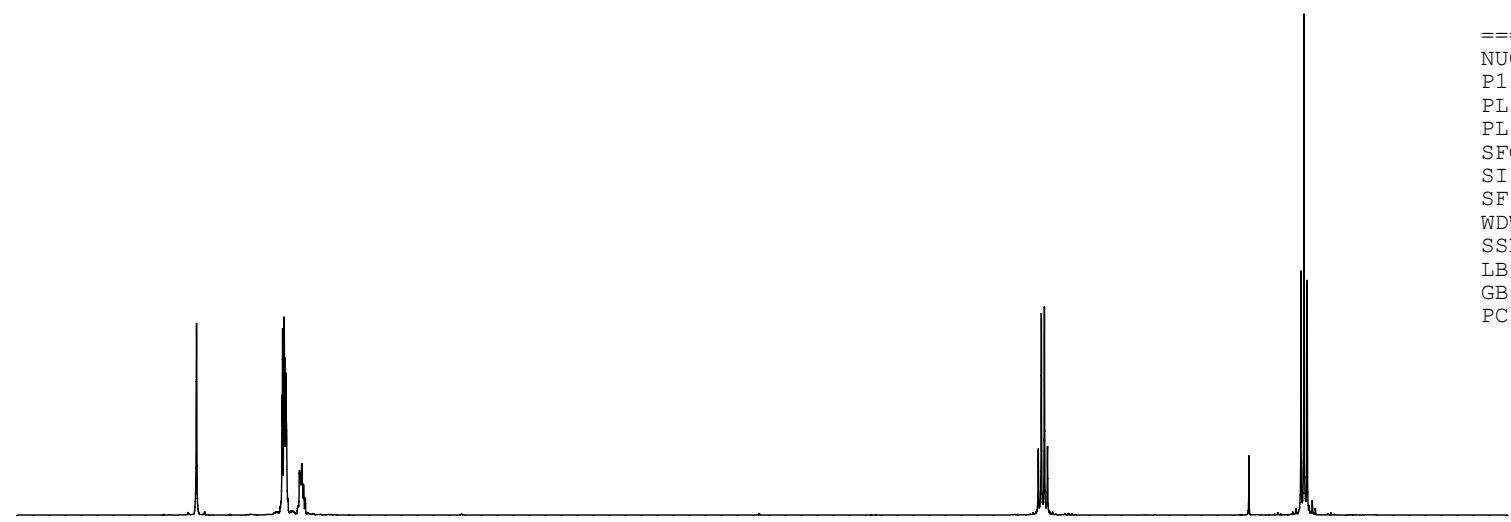

8.5 8.0 7.5 7.0 6.5 6.0 5.5 5.0 4.5 4.0 3.5 3.0 2.5 2.0 1.5 1.0 ppm

0.95

3.01  
 1.04

2.00

3.07

KL30  
C13CPD32 CDC13 {E:\NMR Data} skl 45



NAME Aug11-2012  
EXPNO 8  
PROCNO 1  
Date\_ 20120812  
Time\_ 5.02  
INSTRUM spect  
PROBHD 5 mm PABBO BB-  
PULPROG zgpg30  
TD 65536  
SOLVENT CDC13  
NS 1024  
DS 2  
SWH 24038.461 Hz  
FIDRES 0.366798 Hz  
AQ 1.3631988 sec  
RG 2050  
DW 20.800 usec  
DE 6.50 usec  
TE 305.4 K  
D1 2.00000000 sec  
D11 0.03000000 sec  
TD0 1

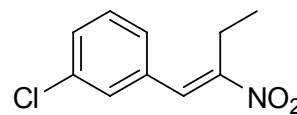

154.41  
135.00  
134.20  
131.34  
130.23  
129.85  
129.32  
127.51

77.35  
77.04  
76.72

20.69  
12.43

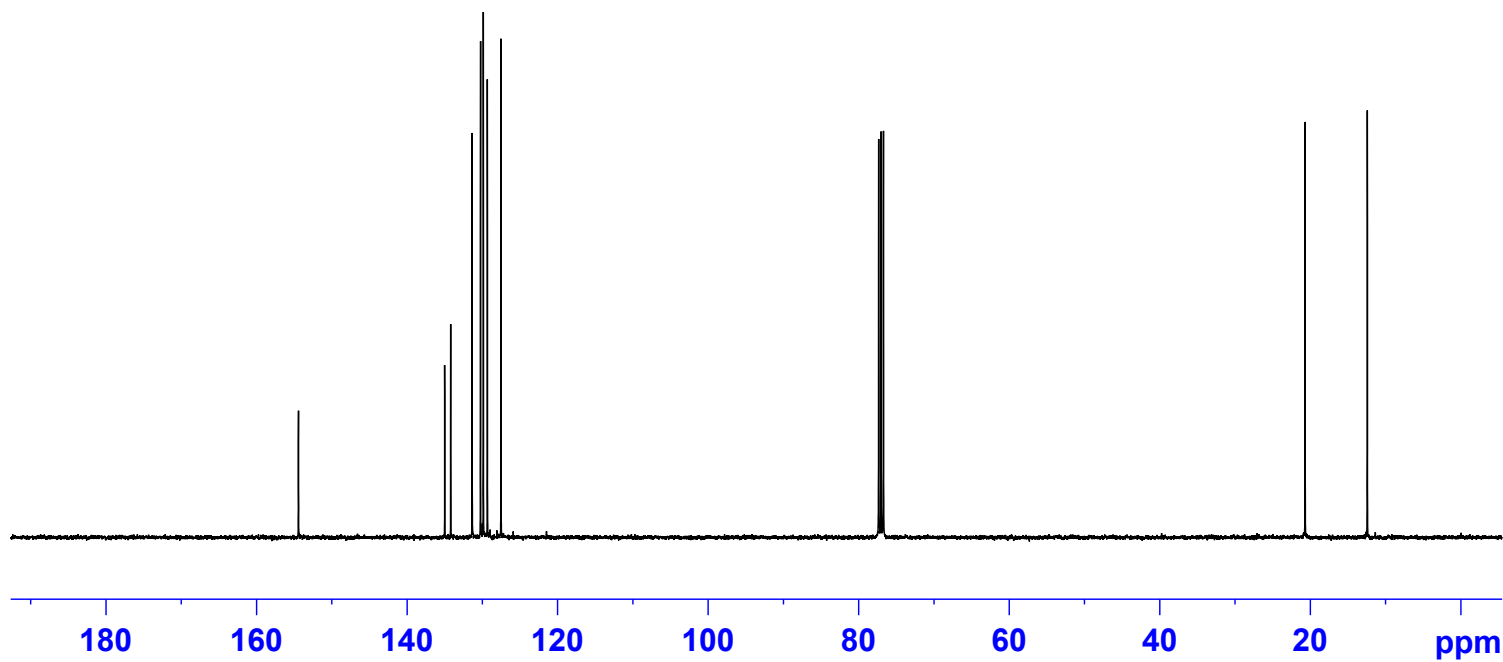

===== CHANNEL f1 =====  
NUC1 13C  
P1 8.50 usec  
PL1 1.00 dB  
PL1W 75.02186584 W  
SFO1 100.6228298 MHz

===== CHANNEL f2 =====  
CPDPRG2 waltz16  
NUC2 1H  
PCPD2 90.00 usec  
PL2 -2.00 dB  
PL12 18.23 dB  
PL13 19.00 dB  
PL2W 31.17179108 W  
PL12W 0.29563907 W  
PL13W 0.24760634 W  
SFO2 400.1316005 MHz  
SI 32768  
SF 100.6127690 MHz  
WDW EM  
SSB 0  
LB 1.00 Hz  
GB 0  
PC 1.40

KL31  
 PROTON CDC13 {E:\NMR Data} skl 46



NAME Aug11-2012  
 EXPNO 9  
 PROCNO 1  
 Date\_ 20120812  
 Time\_ 5.12  
 INSTRUM spect  
 PROBHD 5 mm PABBO BB-  
 PULPROG zg30  
 TD 65536  
 SOLVENT CDC13  
 NS 64  
 DS 2  
 SWH 8223.685 Hz  
 FIDRES 0.125483 Hz  
 AQ 3.9846387 sec  
 RG 287  
 DW 60.800 usec  
 DE 6.50 usec  
 TE 303.9 K  
 D1 1.00000000 sec  
 TD0 1

===== CHANNEL f1 =====  
 NUC1 1H  
 P1 8.76 usec  
 PL1 -2.00 dB  
 PL1W 31.17179108 W  
 SFO1 400.1324710 MHz  
 SI 32768  
 SF 400.1300102 MHz  
 WDW EM  
 SSB 0  
 LB 0.30 Hz  
 GB 0  
 PC 1.00

7.9787  
 7.3831  
 7.3632  
 7.3433  
 7.2588  
 7.0122  
 6.9929  
 6.9815  
 6.9753  
 6.9607  
 6.9547  
 6.9359  
 6.9317

3.8399

2.8954  
 2.8769  
 2.8585  
 2.8400

1.2917  
 1.2732  
 1.2548

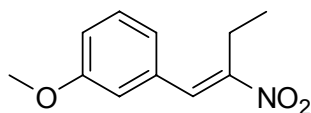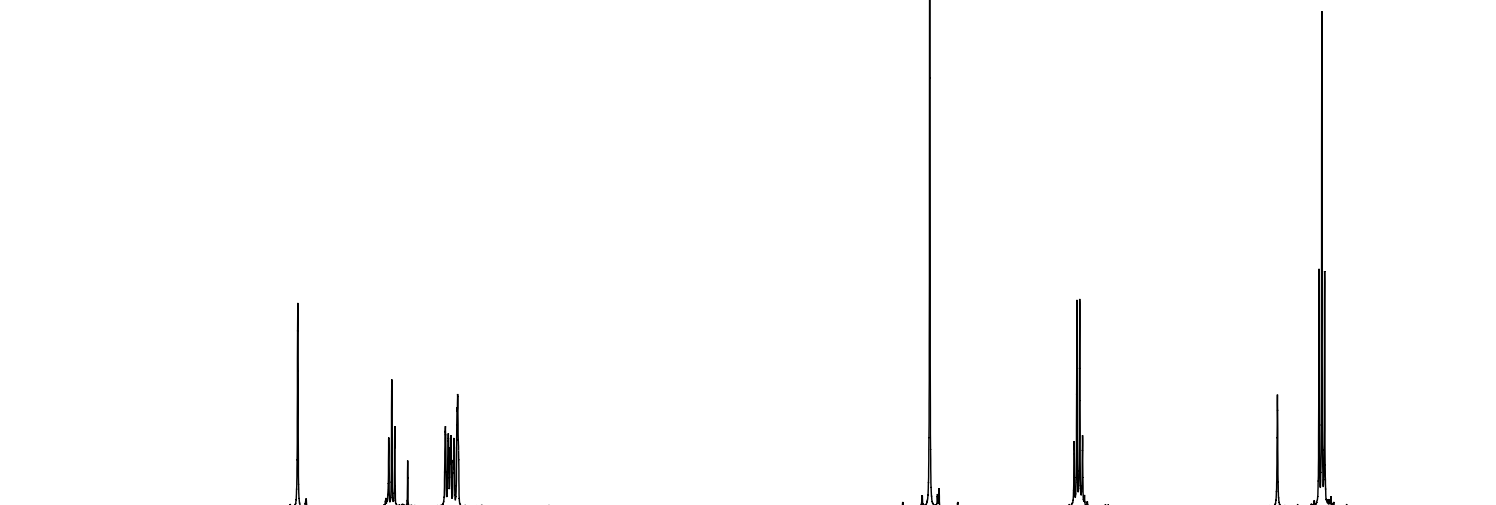

9.5 9.0 8.5 8.0 7.5 7.0 6.5 6.0 5.5 5.0 4.5 4.0 3.5 3.0 2.5 2.0 1.5 1.0 ppm

0.96

1.07

3.00

2.97

2.00

3.09

KL31  
C13CPD32 CDC13 {E:\NMR Data} skl 46



NAME Aug11-2012  
EXPNO 11  
PROCNO 1  
Date\_ 20120812  
Time\_ 7.42  
INSTRUM spect  
PROBHD 5 mm PABBO BB-  
PULPROG zgpg30  
TD 65536  
SOLVENT CDC13  
NS 2048  
DS 2  
SWH 24038.461 Hz  
FIDRES 0.366798 Hz  
AQ 1.3631988 sec  
RG 2050  
DW 20.800 usec  
DE 6.50 usec  
TE 305.2 K  
D1 2.00000000 sec  
D11 0.03000000 sec  
TD0 1

===== CHANNEL f1 =====  
NUC1 13C  
P1 8.50 usec  
PL1 1.00 dB  
PL1W 75.02186584 W  
SFO1 100.6228298 MHz

===== CHANNEL f2 =====  
CPDPRG2 waltz16  
NUC2 1H  
PCPD2 90.00 usec  
PL2 -2.00 dB  
PL12 18.23 dB  
PL13 19.00 dB  
PL2W 31.17179108 W  
PL12W 0.29563907 W  
PL13W 0.24760634 W  
SFO2 400.1316005 MHz  
SI 32768  
SF 100.6127690 MHz  
WDW EM  
SSB 0  
LB 1.00 Hz  
GB 0  
PC 1.40

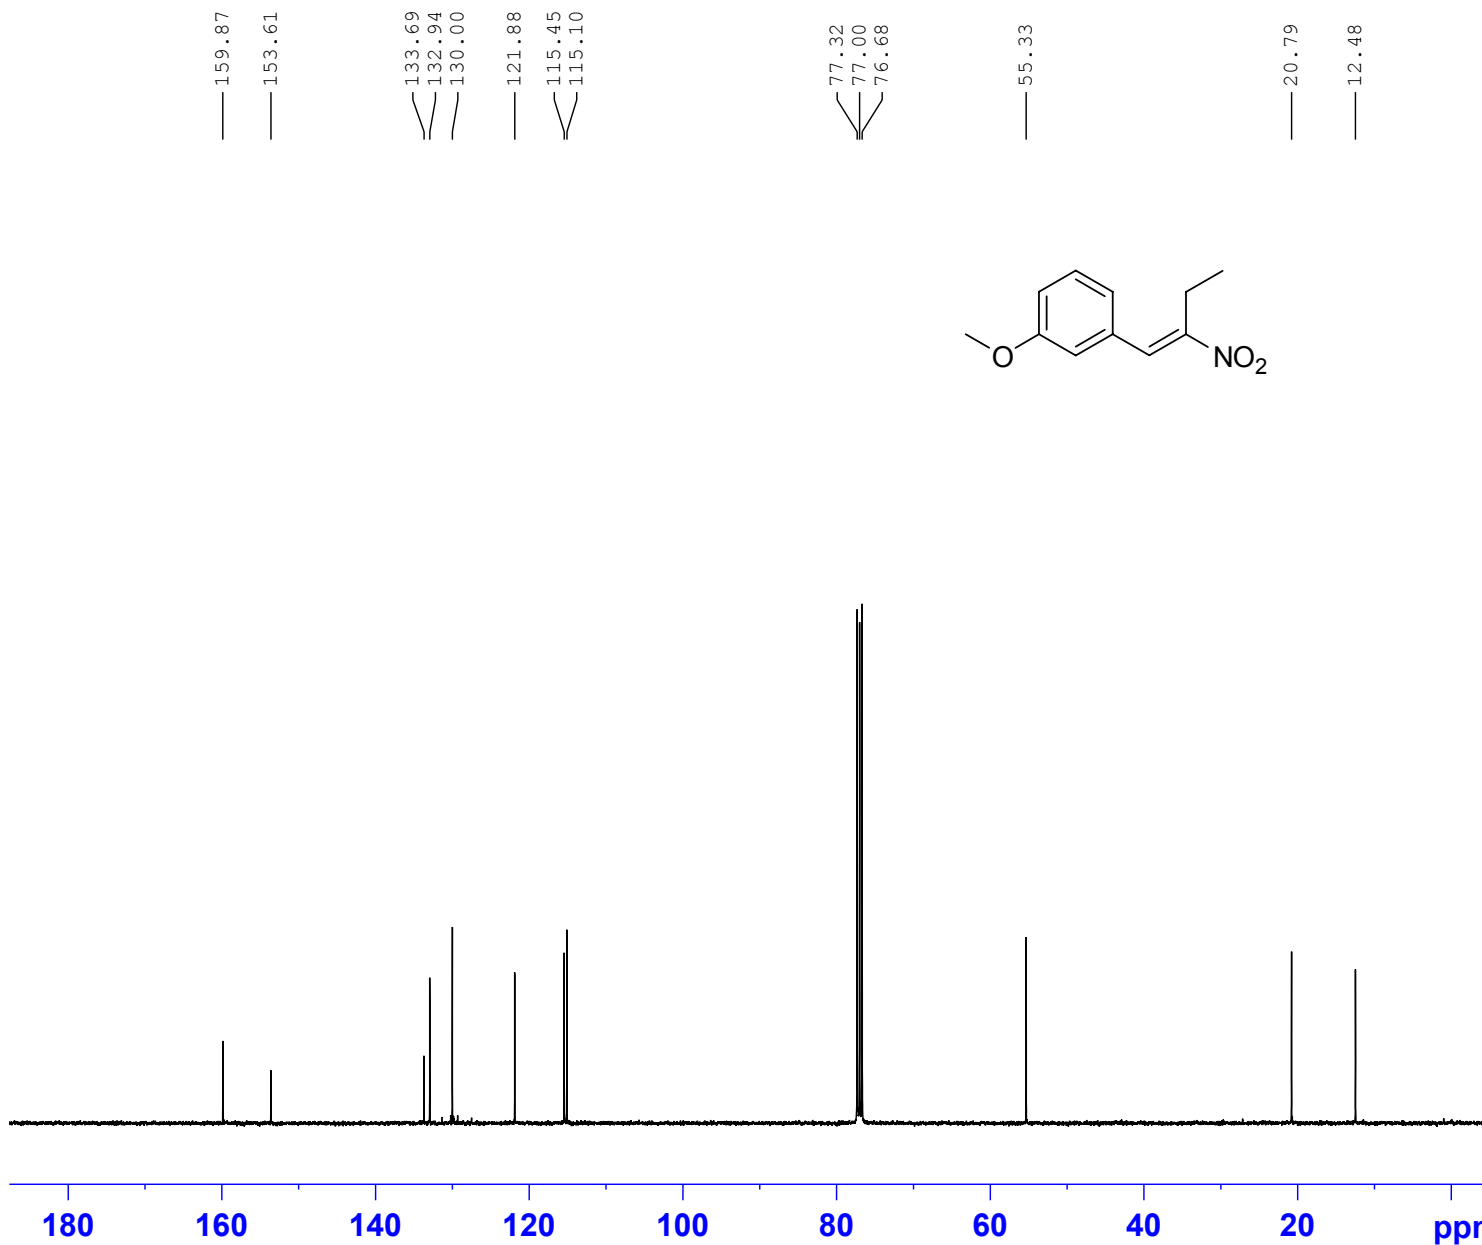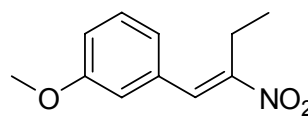



KL32  
PROTON CDCl3 {E:\NMR Data} skl 27



NAME Aug13-2012  
EXPNO 5  
PROCNO 1  
Date\_ 20120813  
Time\_ 19.52  
INSTRUM spect  
PROBHD 5 mm PABBO BB-  
PULPROG zg30  
TD 65536  
SOLVENT CDCl3  
NS 44  
DS 2  
SWH 8223.685 Hz  
FIDRES 0.125483 Hz  
AQ 3.9846387 sec  
RG 57  
DW 60.800 usec  
DE 6.50 usec  
TE 301.5 K  
D1 1.00000000 sec  
TD0 1

===== CHANNEL f1 =====  
NUC1 1H  
P1 8.76 usec  
PL1 -2.00 dB  
PL1W 31.17179108 W  
SFO1 400.1324710 MHz  
SI 32768  
SF 400.1300067 MHz  
WDW EM  
SSB 0  
LB 0.30 Hz  
GB 0  
PC 1.00

7.9931  
7.4148  
7.3933  
7.2677  
6.9853  
6.9633  
3.8563  
2.9130  
2.8945  
2.8760  
2.8576  
1.2952  
1.2767  
1.2582

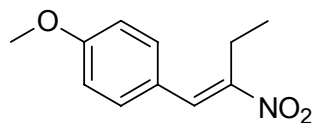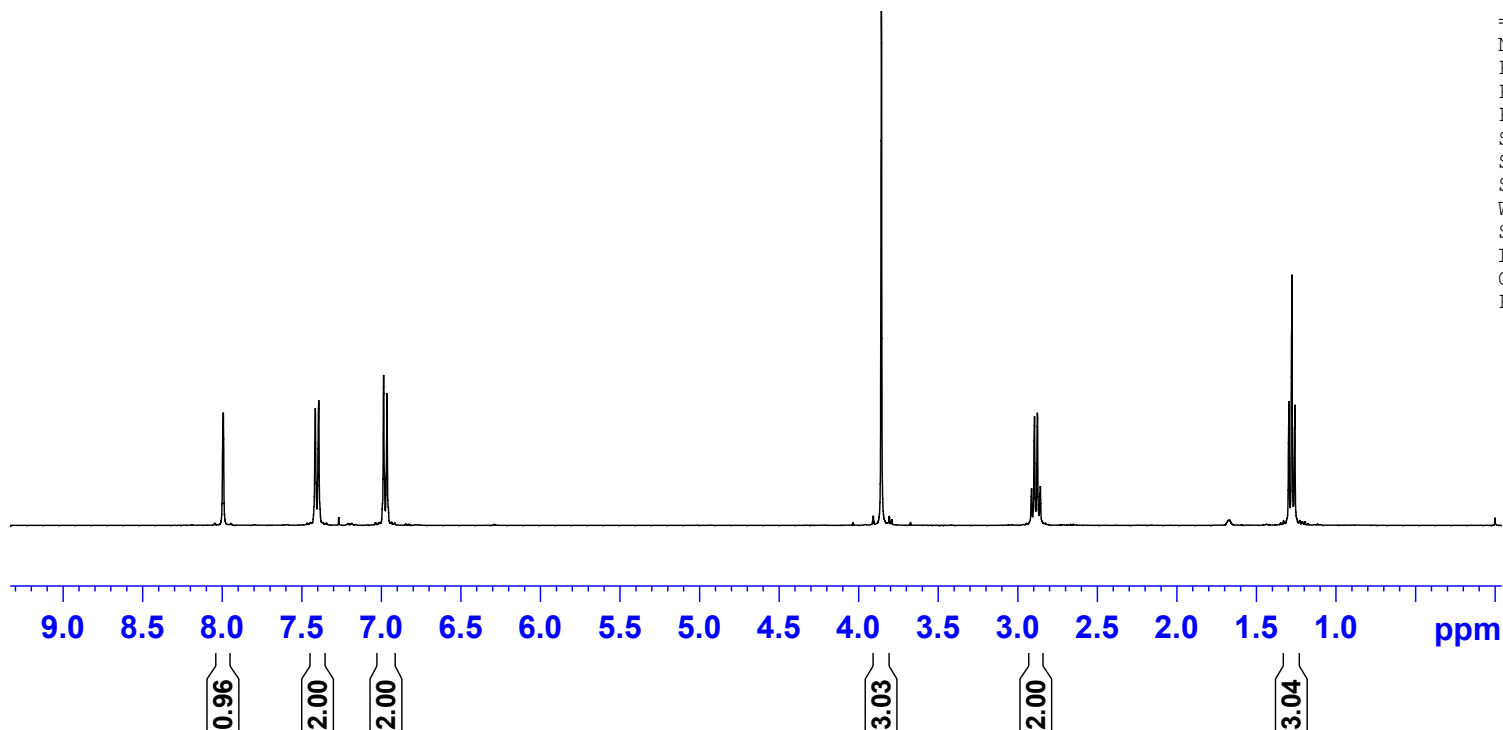

KL32  
C13CPD CDC13 {E:\NMR Data} skl 27



NAME Aug13-2012  
EXPNO 7  
PROCNO 1  
Date\_ 20120813  
Time\_ 21.24  
INSTRUM spect  
PROBHD 5 mm PABBO BB-  
PULPROG zgpg30  
TD 65536  
SOLVENT CDC13  
NS 1024  
DS 4  
SWH 24038.461 Hz  
FIDRES 0.366798 Hz  
AQ 1.3631988 sec  
RG 2050  
DW 20.800 usec  
DE 6.50 usec  
TE 304.2 K  
D1 2.00000000 sec  
D11 0.03000000 sec  
TD0 1

===== CHANNEL f1 =====  
NUC1 13C  
P1 8.50 usec  
PL1 1.00 dB  
PL1W 75.02186584 W  
SFO1 100.6228298 MHz

===== CHANNEL f2 =====  
CPDPRG2 waltz16  
NUC2 1H  
PCPD2 90.00 usec  
PL2 -2.00 dB  
PL12 18.23 dB  
PL13 19.00 dB  
PL2W 31.17179108 W  
PL12W 0.29563907 W  
PL13W 0.24760634 W  
SFO2 400.1316005 MHz  
SI 32768  
SF 100.6127690 MHz  
WDW EM  
SSB 0  
LB 1.00 Hz  
GB 0  
PC 1.40

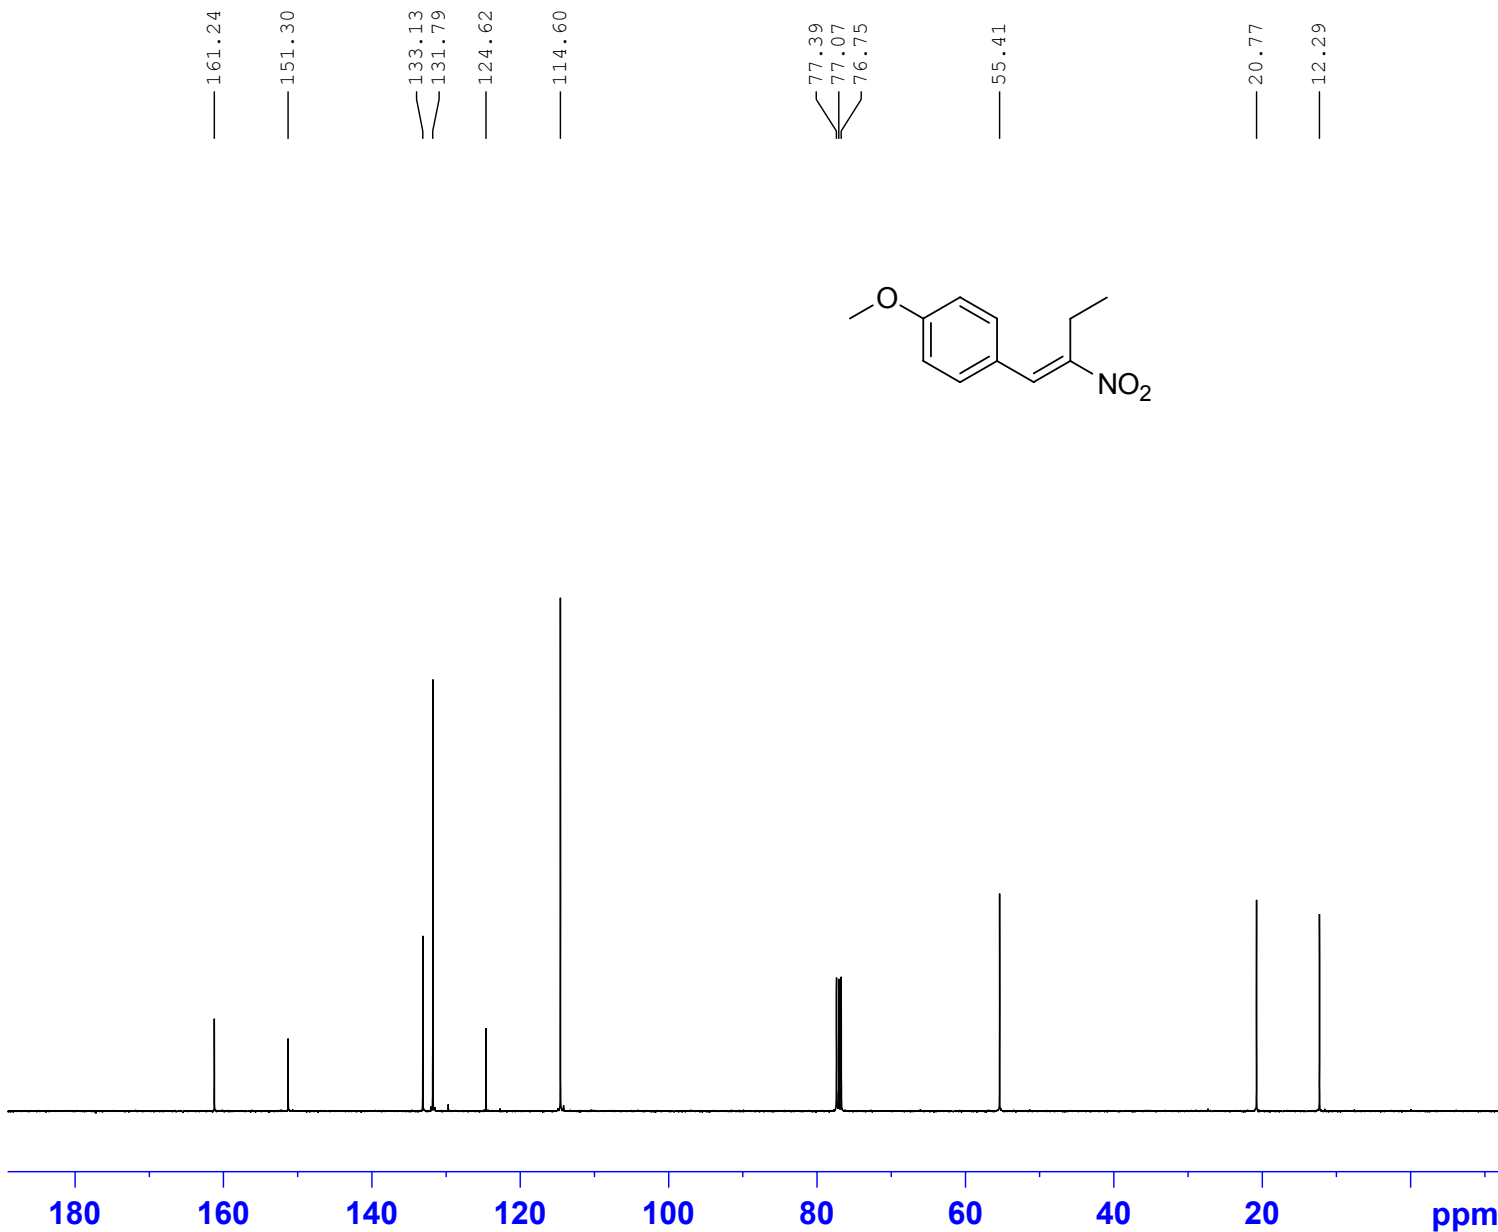

KL23  
PROTON CDC13 {E:\NMR Data} skl 28



8.7075  
8.6645  
8.6582  
8.6529  
8.0431  
7.8136  
7.8102  
7.7937  
7.4586  
7.4564  
7.4464  
7.4435  
7.4412  
7.4267

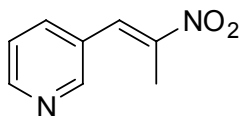

2.4736  
2.4706

NAME Jul25-2012  
EXPNO 8  
PROCNO 1  
Date\_ 20120726  
Time\_ 9.03  
INSTRUM spect  
PROBHD 5 mm PABBO BB-  
PULPROG zg30  
TD 65536  
SOLVENT CDC13  
NS 32  
DS 2  
SWH 8223.685 Hz  
FIDRES 0.125483 Hz  
AQ 3.9846387 sec  
RG 45.2  
DW 60.800 usec  
DE 6.50 usec  
TE 301.2 K  
D1 1.00000000 sec  
TD0 1

===== CHANNEL f1 =====  
NUC1 1H  
P1 8.76 usec  
PL1 -2.00 dB  
PL1W 31.17179108 W  
SFO1 400.1324710 MHz  
SI 32768  
SF 400.1299640 MHz  
WDW EM  
SSB 0  
LB 0.30 Hz  
GB 0  
PC 1.00

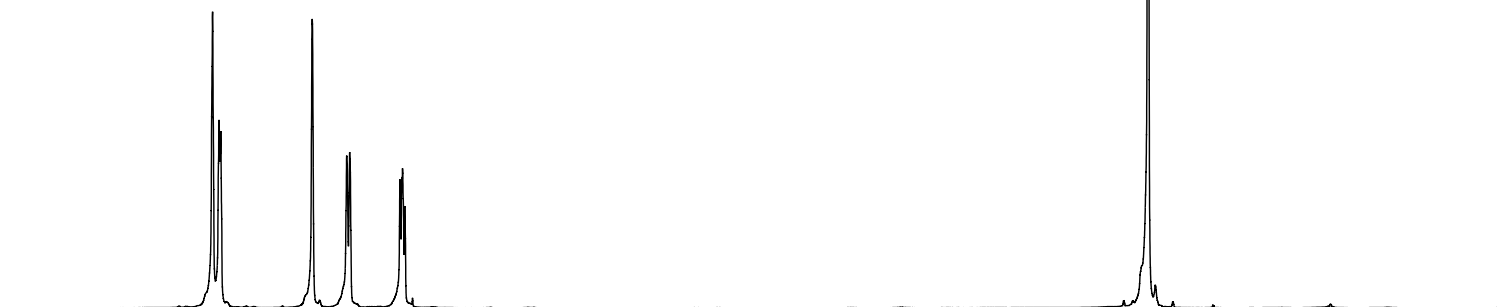

9 8 7 6 5 4 3 2 1 ppm

1.08  
1.00

1.01  
1.05  
1.04

3.00

KL23  
C13CPD CDC13 {E:\NMR Data} sk1 28



NAME Jul25-2012  
EXPNO 7  
PROCNO 1  
Date\_ 20120726  
Time\_ 4.02  
INSTRUM spect  
PROBHD 5 mm PABBO BB-  
PULPROG zgpg30  
TD 65536  
SOLVENT CDC13  
NS 2048  
DS 4  
SWH 24038.461 Hz  
FIDRES 0.366798 Hz  
AQ 1.3631988 sec  
RG 2050  
DW 20.800 usec  
DE 6.50 usec  
TE 303.6 K  
D1 2.00000000 sec  
D11 0.03000000 sec  
TD0 1

===== CHANNEL f1 =====  
NUC1 13C  
P1 8.50 usec  
PL1 1.00 dB  
PL1W 75.02186584 W  
SFO1 100.6228298 MHz

===== CHANNEL f2 =====  
CPDPRG2 waltz16  
NUC2 1H  
PCPD2 90.00 usec  
PL2 -2.00 dB  
PL12 18.23 dB  
PL13 19.00 dB  
PL2W 31.17179108 W  
PL12W 0.29563907 W  
PL13W 0.24760634 W  
SFO2 400.1316005 MHz  
SI 32768  
SF 100.6127690 MHz  
WDW EM  
SSB 0  
LB 1.00 Hz  
GB 0  
PC 1.40

150.56  
150.49  
149.21

136.58  
129.74  
128.49  
123.56

77.53  
77.21  
76.89

13.91

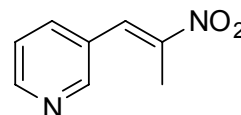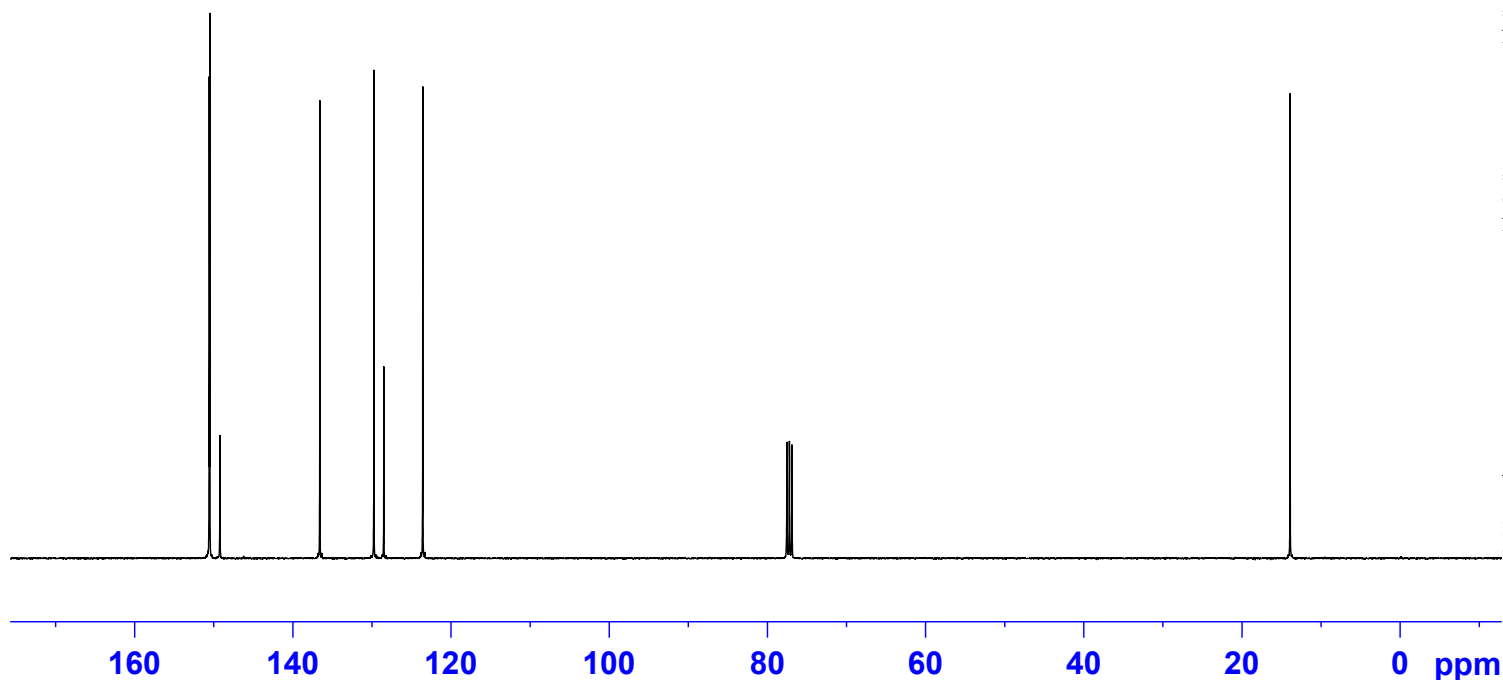

KL22

PROTON CDC13 {E:\NMR Data} skl 44

7.8337  
7.6518  
7.6486  
6.8354  
6.8267  
6.5931  
6.5886  
6.5844  
6.5799

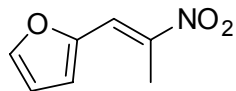

2.5711

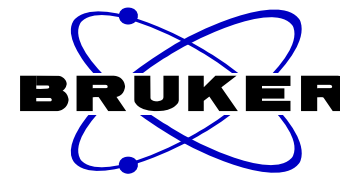

NAME Jul25-2012  
EXPNO 9  
PROCNO 1  
Date\_ 20120726  
Time\_ 9.10  
INSTRUM spect  
PROBHD 5 mm PABBO BB-  
PULPROG zg30  
TD 65536  
SOLVENT CDC13  
NS 32  
DS 2  
SWH 8223.685 Hz  
FIDRES 0.125483 Hz  
AQ 3.9846387 sec  
RG 40.3  
DW 60.800 usec  
DE 6.50 usec  
TE 301.2 K  
D1 1.00000000 sec  
TD0 1

==== CHANNEL f1 =====  
NUC1 1H  
P1 8.76 usec  
PL1 -2.00 dB  
PL1W 31.17179108 W  
SFO1 400.1324710 MHz  
SI 32768  
SF 400.1299933 MHz  
WDW EM  
SSB 0  
LB 0.30 Hz  
GB 0  
PC 1.00

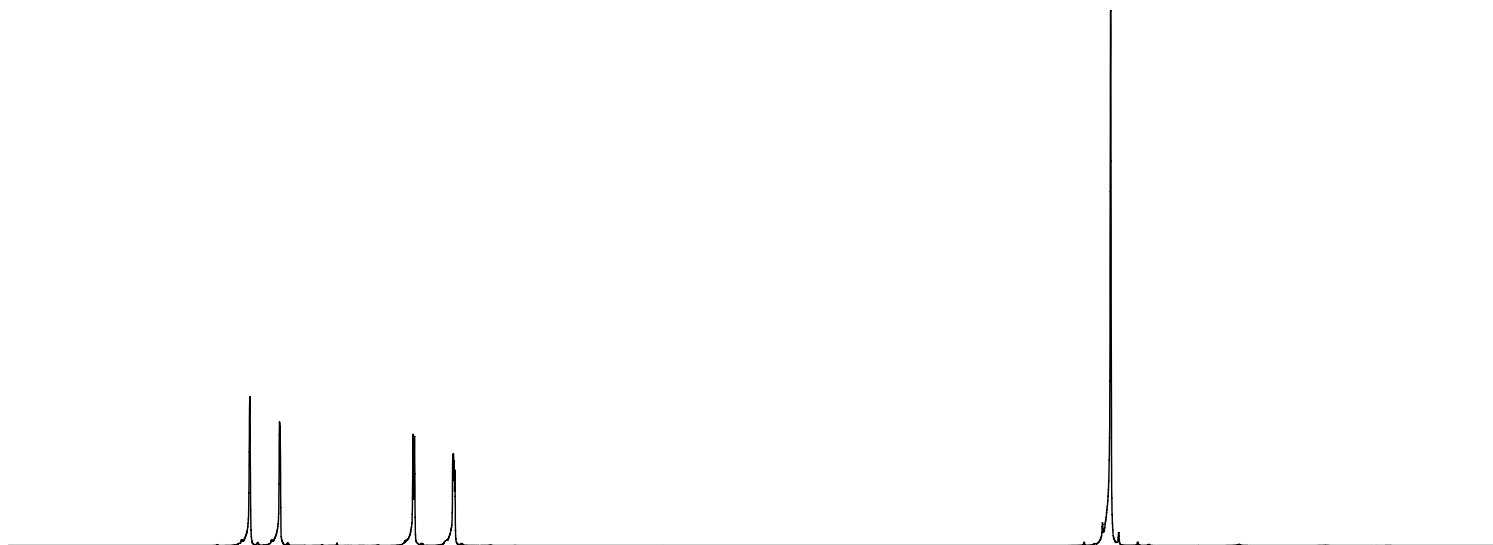

9.0 8.5 8.0 7.5 7.0 6.5 6.0 5.5 5.0 4.5 4.0 3.5 3.0 2.5 2.0 1.5 1.0 ppm

0.97  
0.96

1.01  
0.99

3.00

KL22  
C13CPD CDC13 {E:\NMR Data} skl 44

147.96  
146.28  
144.42

120.54  
119.18  
112.87

77.48  
77.16  
76.84

13.90

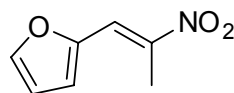

NAME Jul25-2012  
EXPNO 5  
PROCNO 1  
Date\_ 20120726  
Time\_ 0.58  
INSTRUM spect  
PROBHD 5 mm PABBO BB-  
PULPROG zgpg30  
TD 65536  
SOLVENT CDC13  
NS 2048  
DS 4  
SWH 24038.461 Hz  
FIDRES 0.366798 Hz  
AQ 1.3631988 sec  
RG 2050  
DW 20.800 usec  
DE 6.50 usec  
TE 303.9 K  
D1 2.00000000 sec  
D11 0.03000000 sec  
TD0 1

===== CHANNEL f1 =====  
NUC1 13C  
P1 8.50 usec  
PL1 1.00 dB  
PL1W 75.02186584 W  
SFO1 100.6228298 MHz

===== CHANNEL f2 =====  
CPDPRG2 waltz16  
NUC2 1H  
PCPD2 90.00 usec  
PL2 -2.00 dB  
PL12 18.23 dB  
PL13 19.00 dB  
PL2W 31.17179108 W  
PL12W 0.29563907 W  
PL13W 0.24760634 W  
SFO2 400.1316005 MHz  
SI 32768  
SF 100.6127690 MHz  
WDW EM  
SSB 0  
LB 1.00 Hz  
GB 0  
PC 1.40

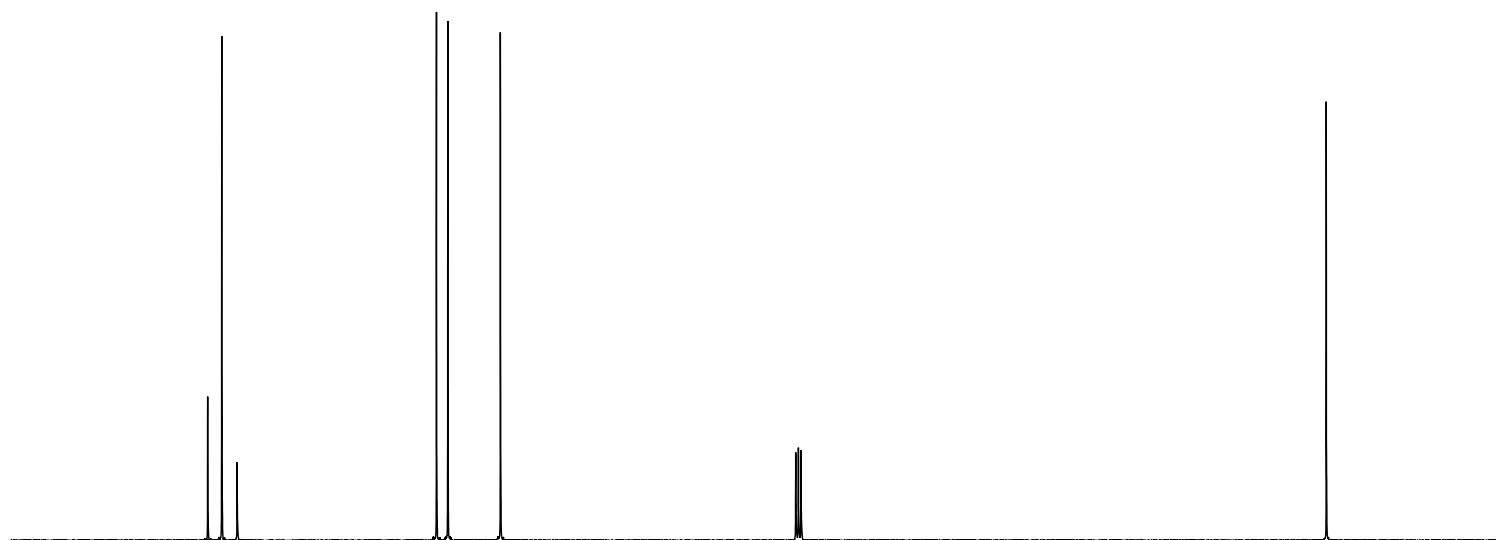

160 150 140 130 120 110 100 90 80 70 60 50 40 30 20 10 ppm

KL34  
PROTON CDC13 {E:\NMR Data} skl 27



NAME Sep21-2012  
EXPNO 10  
PROCNO 1  
Date\_ 20120922  
Time\_ 6.25  
INSTRUM spect  
PROBHD 5 mm PABBO BB-  
PULPROG zg30  
TD 65536  
SOLVENT CDC13  
NS 32  
DS 2  
SWH 8223.685 Hz  
FIDRES 0.125483 Hz  
AQ 3.9846387 sec  
RG 322  
DW 60.800 usec  
DE 6.50 usec  
TE 302.2 K  
D1 1.00000000 sec  
TD0 1

===== CHANNEL f1 =====  
NUC1 1H  
P1 8.76 usec  
PL1 -2.00 dB  
PL1W 31.17179108 W  
SFO1 400.1324710 MHz  
SI 32768  
SF 400.1300095 MHz  
WDW EM  
SSB 0  
LB 0.30 Hz  
GB 0  
PC 1.00

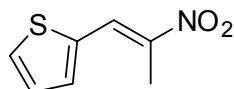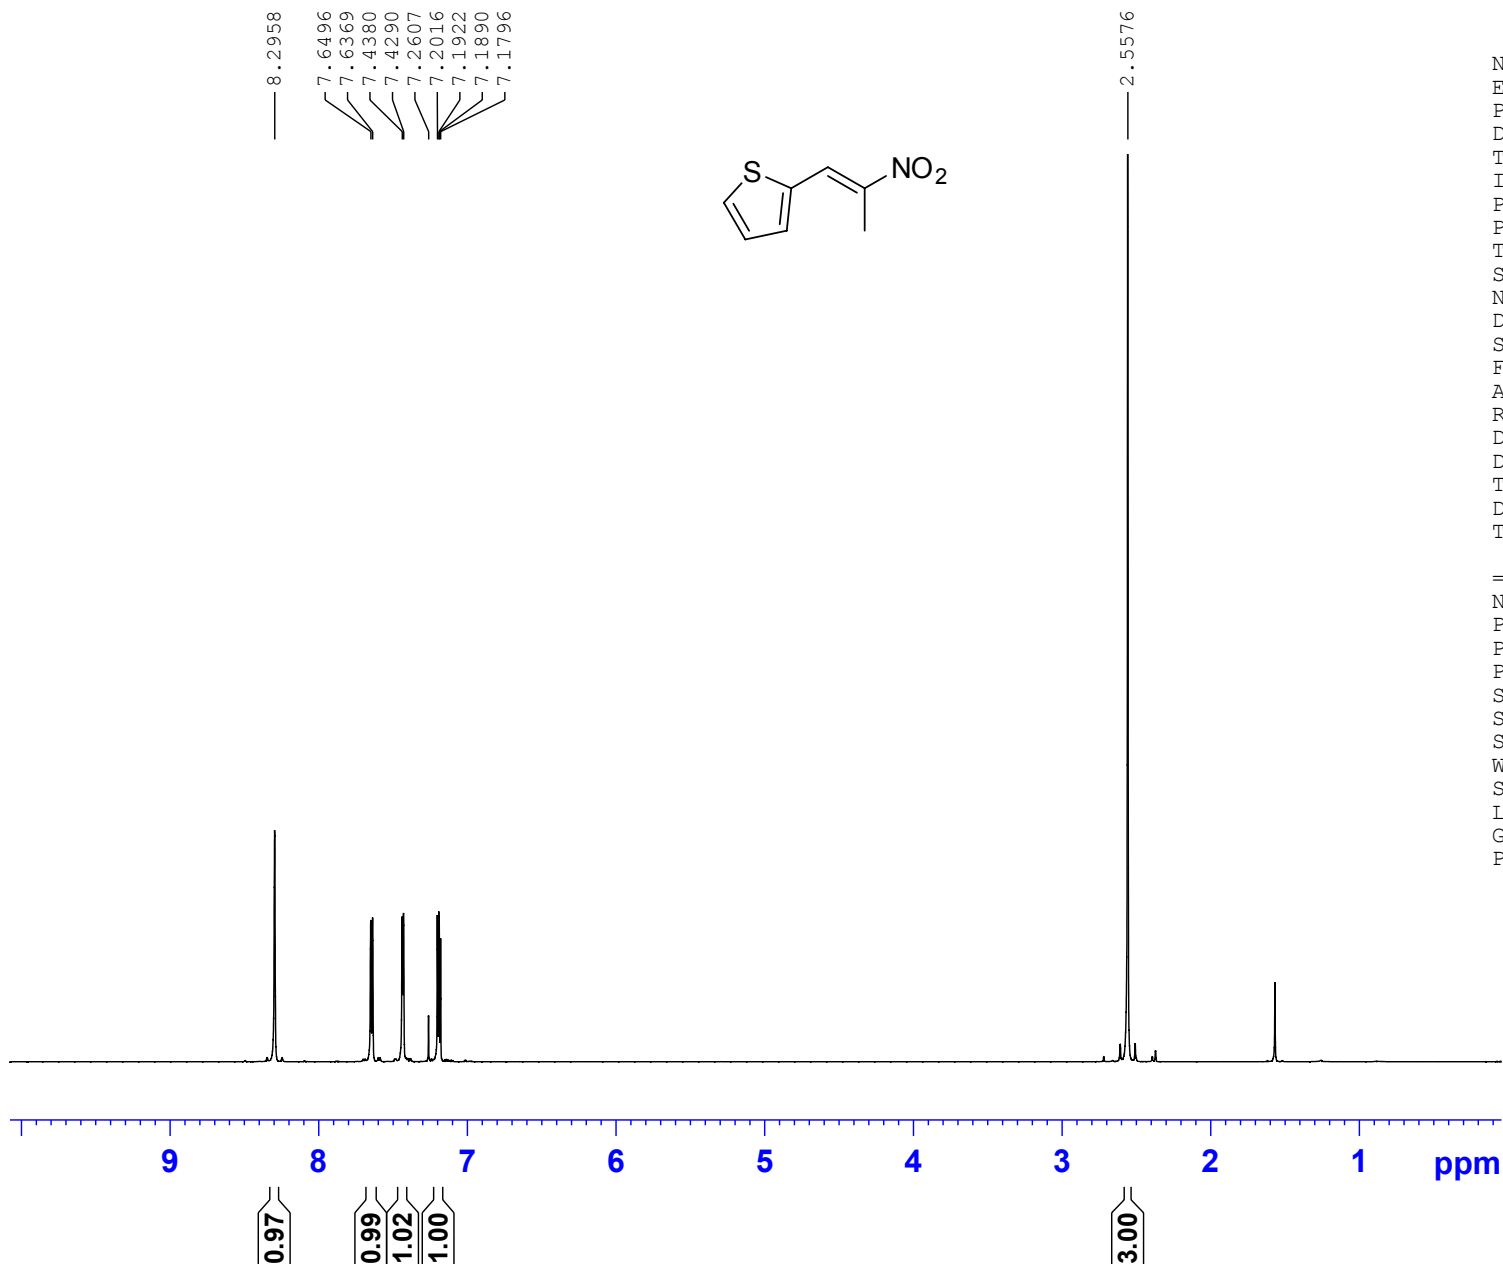

KL34  
C13CPD CDC13 {E:\NMR Data} skl 27



NAME Sep21-2012  
EXPNO 12  
PROCNO 1  
Date\_ 20120922  
Time\_ 7.57  
INSTRUM spect  
PROBHD 5 mm PABBO BB-  
PULPROG zgpg30  
TD 65536  
SOLVENT CDC13  
NS 1024  
DS 4  
SWH 24038.461 Hz  
FIDRES 0.366798 Hz  
AQ 1.3631988 sec  
RG 2050  
DW 20.800 usec  
DE 6.50 usec  
TE 303.6 K  
D1 2.00000000 sec  
D11 0.03000000 sec  
TD0 1

===== CHANNEL f1 =====  
NUC1 13C  
P1 8.50 usec  
PL1 1.00 dB  
PL1W 75.02186584 W  
SFO1 100.6228298 MHz

===== CHANNEL f2 =====  
CPDPRG2 waltz16  
NUC2 1H  
PCPD2 90.00 usec  
PL2 -2.00 dB  
PL12 18.23 dB  
PL13 19.00 dB  
PL2W 31.17179108 W  
PL12W 0.29563907 W  
PL13W 0.24760634 W  
SFO2 400.1316005 MHz  
SI 32768  
SF 100.6127668 MHz  
WDW EM  
SSB 0  
LB 1.00 Hz  
GB 0  
PC 1.40

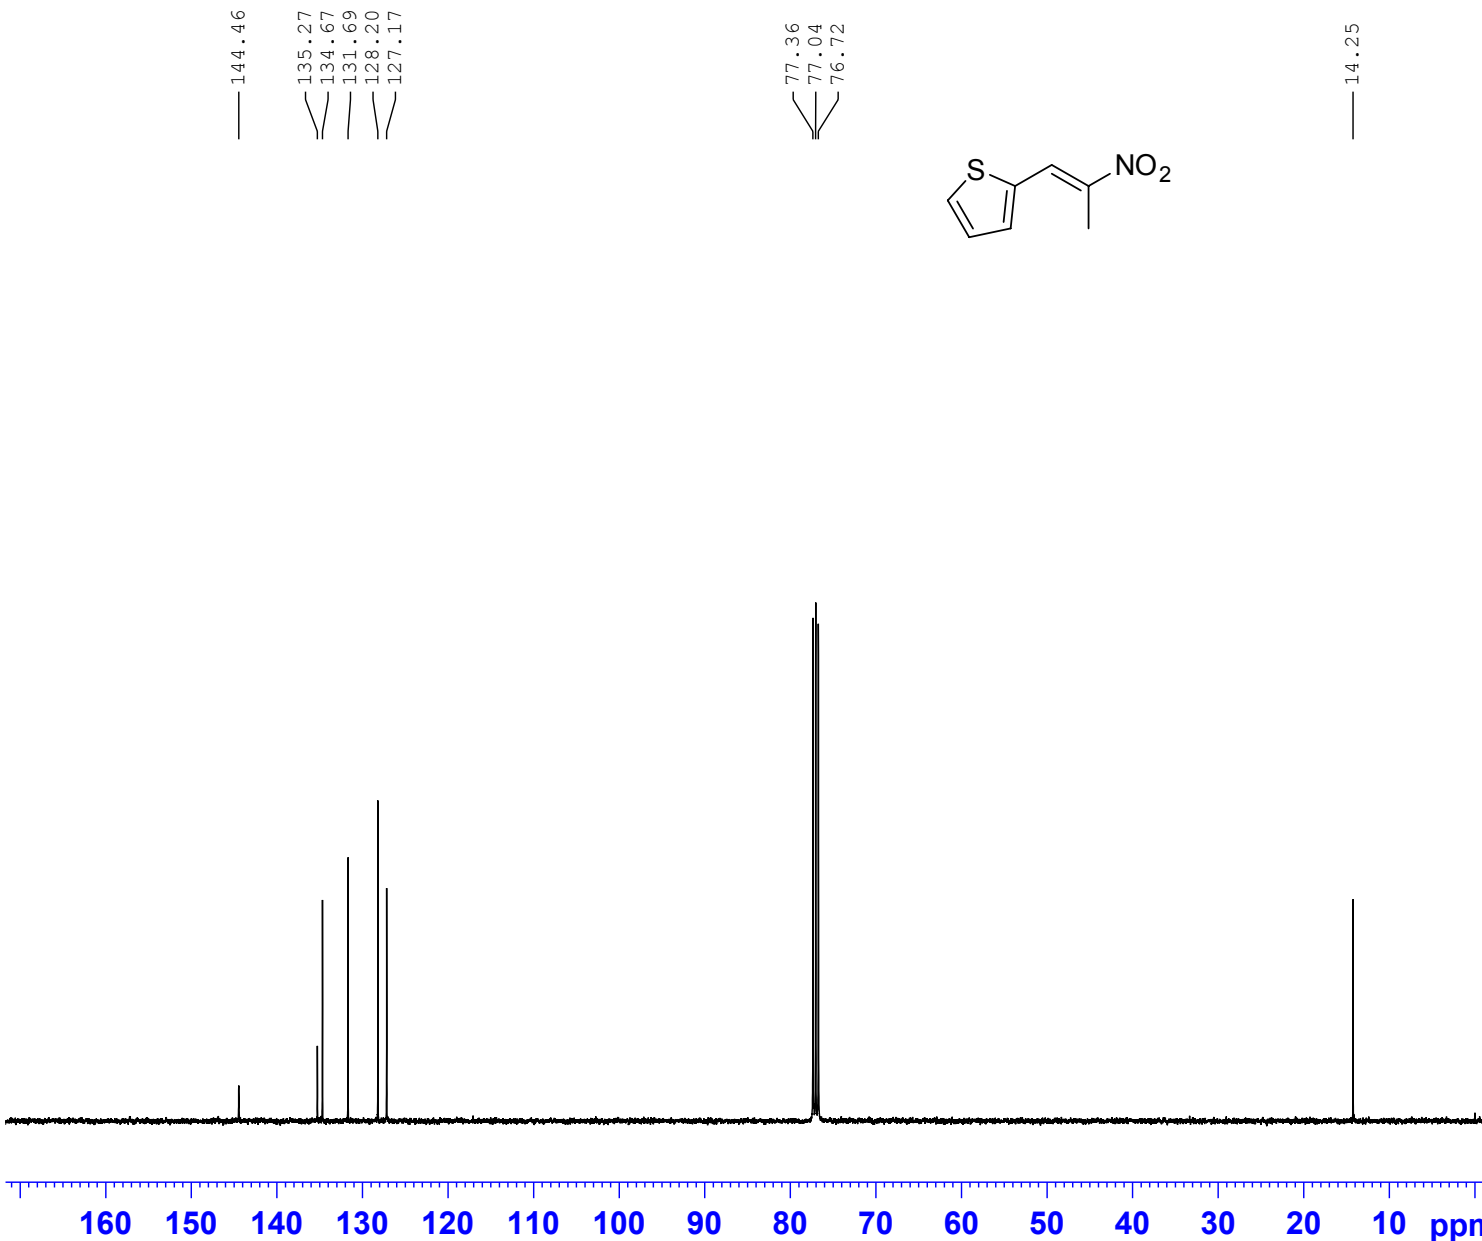



KL01 REDUCTION  
 PROTON CDCl3 {E:\NMR Data} skl 28



7.3172  
 7.3128  
 7.3054  
 7.3001  
 7.2959  
 7.2852  
 7.2816  
 7.2761  
 7.2687  
 7.2650  
 7.2610  
 7.2536  
 7.2473  
 7.2391  
 7.2323  
 7.2287  
 7.2256  
 7.1624  
 7.1584  
 7.1534  
 7.1418  
 7.1321

4.8057  
 4.7892  
 4.7720  
 4.7540  
 4.7368  
 4.7203

3.3334  
 3.3146  
 3.2980  
 3.2797  
 3.0190  
 3.0023  
 2.9841  
 2.9669

1.5331  
 1.5164

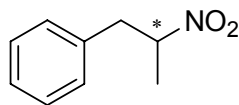

NAME Jun29-2011  
 EXPNO 3  
 PROCNO 1  
 Date\_ 20110629  
 Time\_ 16.05  
 INSTRUM spect  
 PROBHD 5 mm PABBO BB-  
 PULPROG zg30  
 TD 65536  
 SOLVENT CDCl3  
 NS 64  
 DS 2  
 SWH 8223.685 Hz  
 FIDRES 0.125483 Hz  
 AQ 3.9846387 sec  
 RG 57  
 DW 60.800 usec  
 DE 6.50 usec  
 TE 301.9 K  
 D1 1.00000000 sec  
 TD0 1

===== CHANNEL f1 =====  
 NUC1 1H  
 P1 8.76 usec  
 PL1 -2.00 dB  
 PL1W 31.17179108 W  
 SFO1 400.1324710 MHz  
 SI 32768  
 SF 400.1300206 MHz  
 WDW EM  
 SSB 0  
 LB 0.30 Hz  
 GB 0  
 PC 1.00

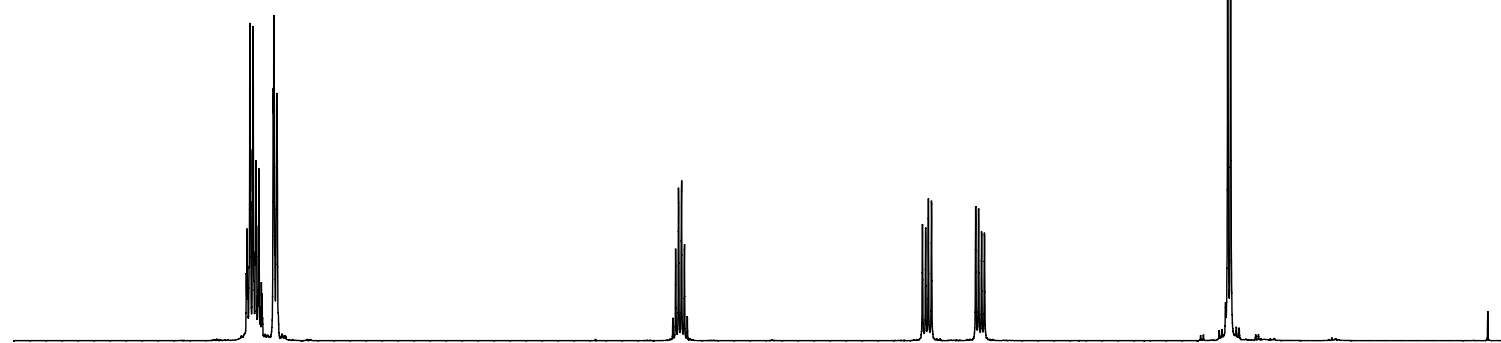

8.5 8.0 7.5 7.0 6.5 6.0 5.5 5.0 4.5 4.0 3.5 3.0 2.5 2.0 1.5 1.0 ppm

3.00  
 1.96

0.99

1.00  
 1.01

3.00

KL01 REDUCTION  
C13CPD CDCl3 {E:\NMR Data} skl 44



NAME Jun30-2011  
EXPNO 3  
PROCNO 1  
Date\_ 20110701  
Time\_ 19.39  
INSTRUM spect  
PROBHD 5 mm PABBO BB-  
PULPROG zgpg30  
TD 65536  
SOLVENT CDCl3  
NS 1024  
DS 4  
SWH 24038.461 Hz  
FIDRES 0.366798 Hz  
AQ 1.3631988 sec  
RG 2050  
DW 20.800 usec  
DE 6.50 usec  
TE 304.2 K  
D1 2.00000000 sec  
D11 0.03000000 sec  
TD0 1

===== CHANNEL f1 =====  
NUC1 13C  
P1 8.50 usec  
PL1 1.00 dB  
PL1W 75.02186584 W  
SFO1 100.6228298 MHz

===== CHANNEL f2 =====  
CPDPRG2 waltz16  
NUC2 1H  
PCPD2 90.00 usec  
PL2 -2.00 dB  
PL12 18.23 dB  
PL13 19.00 dB  
PL2W 31.17179108 W  
PL12W 0.29563907 W  
PL13W 0.24760634 W  
SFO2 400.1316005 MHz  
SI 32768  
SF 100.6127693 MHz  
WDW EM  
SSB 0  
LB 1.00 Hz  
GB 0  
PC 1.40

135.58  
128.99  
128.83  
127.41

84.43  
77.40  
77.08  
76.76

41.17

18.79

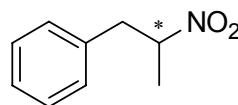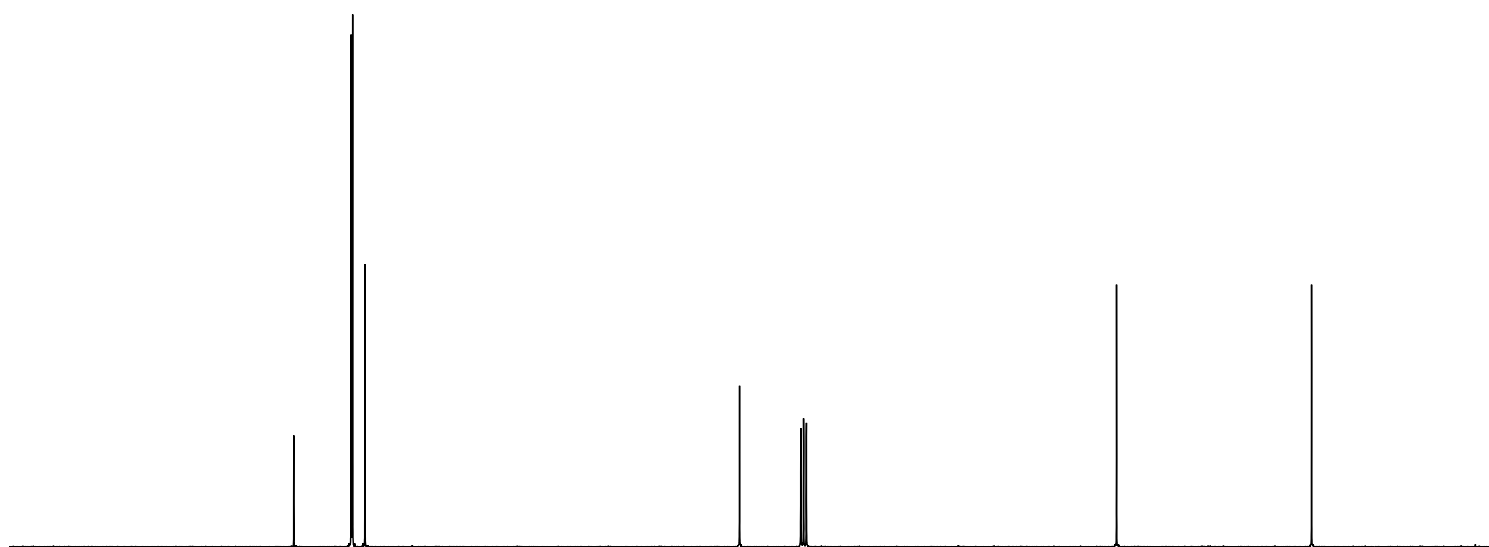

160 150 140 130 120 110 100 90 80 70 60 50 40 30 20 10 ppm

KL02 REDUCTION  
 PROTON CDCl3 {E:\NMR Data} skl 14



7.2618  
 7.2567  
 7.2501  
 7.2471  
 7.2417  
 7.2371  
 7.2349  
 7.2166  
 7.2148  
 7.1676  
 7.0573  
 7.0530  
 7.0489  
 7.0471  
 7.0435  
 7.0414  
 7.0355  
 7.0313

4.8042  
 4.7875  
 4.7851  
 4.7710  
 4.7683  
 4.7544  
 4.7517  
 4.7377  
 4.7352  
 4.7186

3.3205  
 3.3011  
 3.2852  
 3.2658  
 3.0096  
 2.9934  
 2.9743  
 2.9581

1.5622  
 1.5455

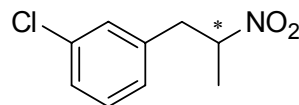

NAME Jul01-2011  
 EXPNO 9  
 PROCNO 1  
 Date\_ 20110702  
 Time\_ 9.45  
 INSTRUM spect  
 PROBHD 5 mm PABBO BB-  
 PULPROG zg30  
 TD 65536  
 SOLVENT CDCl3  
 NS 64  
 DS 2  
 SWH 8223.685 Hz  
 FIDRES 0.125483 Hz  
 AQ 3.9846387 sec  
 RG 144  
 DW 60.800 usec  
 DE 6.50 usec  
 TE 302.6 K  
 D1 1.00000000 sec  
 TD0 1

===== CHANNEL f1 =====  
 NUC1 1H  
 P1 8.76 usec  
 PL1 -2.00 dB  
 PL1W 31.17179108 W  
 SFO1 400.1324710 MHz  
 SI 32768  
 SF 400.1300112 MHz  
 WDW EM  
 SSB 0  
 LB 0.30 Hz  
 GB 0  
 PC 1.00

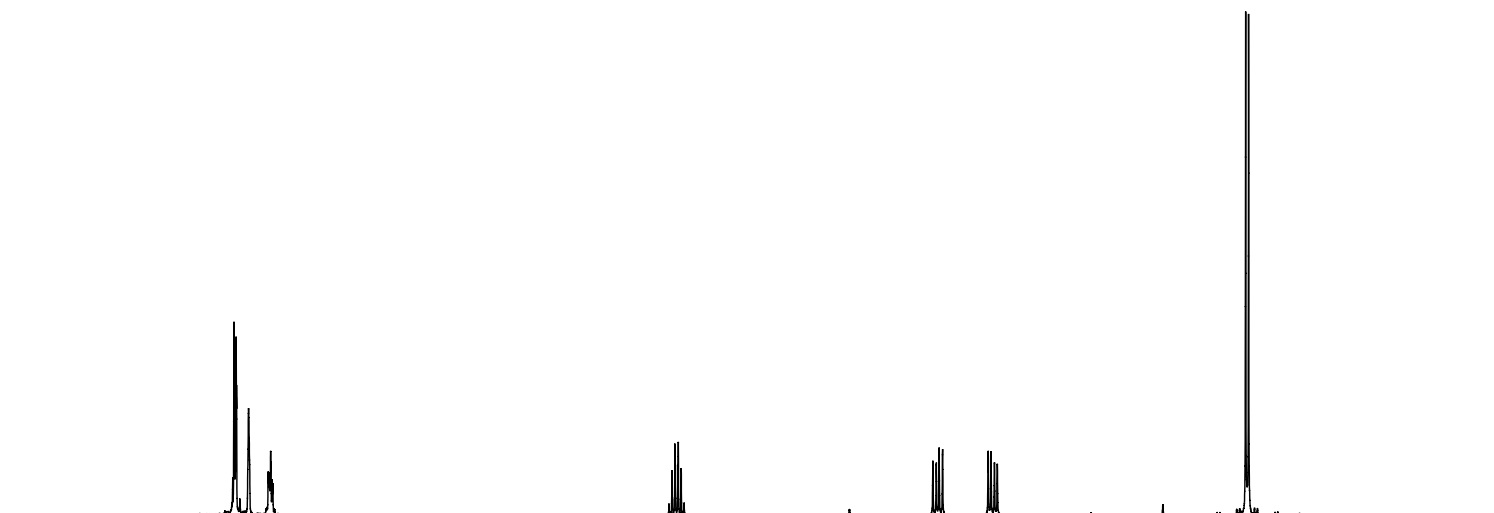

8.0 7.5 7.0 6.5 6.0 5.5 5.0 4.5 4.0 3.5 3.0 2.5 2.0 1.5 1.0 ppm

2.00  
 0.95  
 0.96

0.99

1.00  
 1.00

3.06

KL02 REDUCTION  
 C13CPD CDCl3 {E:\NMR Data} skl 14



137.50  
 134.63  
 130.10  
 129.13  
 127.71  
 127.15

84.03  
 77.35  
 77.03  
 76.71

40.61

18.87

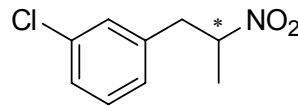

NAME Jul01-2011  
 EXPNO 10  
 PROCNO 1  
 Date\_ 20110702  
 Time\_ 14.58  
 INSTRUM spect  
 PROBHD 5 mm PABBO BB-  
 PULPROG zgpg30  
 TD 65536  
 SOLVENT CDCl3  
 NS 1024  
 DS 4  
 SWH 24038.461 Hz  
 FIDRES 0.366798 Hz  
 AQ 1.3631988 sec  
 RG 2050  
 DW 20.800 usec  
 DE 6.50 usec  
 TE 304.1 K  
 D1 2.00000000 sec  
 D11 0.03000000 sec  
 TD0 1

===== CHANNEL f1 =====  
 NUC1 13C  
 P1 8.50 usec  
 PL1 1.00 dB  
 PL1W 75.02186584 W  
 SFO1 100.6228298 MHz

===== CHANNEL f2 =====  
 CPDPRG2 waltz16  
 NUC2 1H  
 PCPD2 90.00 usec  
 PL2 -2.00 dB  
 PL12 18.23 dB  
 PL13 19.00 dB  
 PL2W 31.17179108 W  
 PL12W 0.29563907 W  
 PL13W 0.24760634 W  
 SFO2 400.1316005 MHz  
 SI 32768  
 SF 100.6127690 MHz  
 WDW EM  
 SSB 0  
 LB 1.00 Hz  
 GB 0  
 PC 1.40

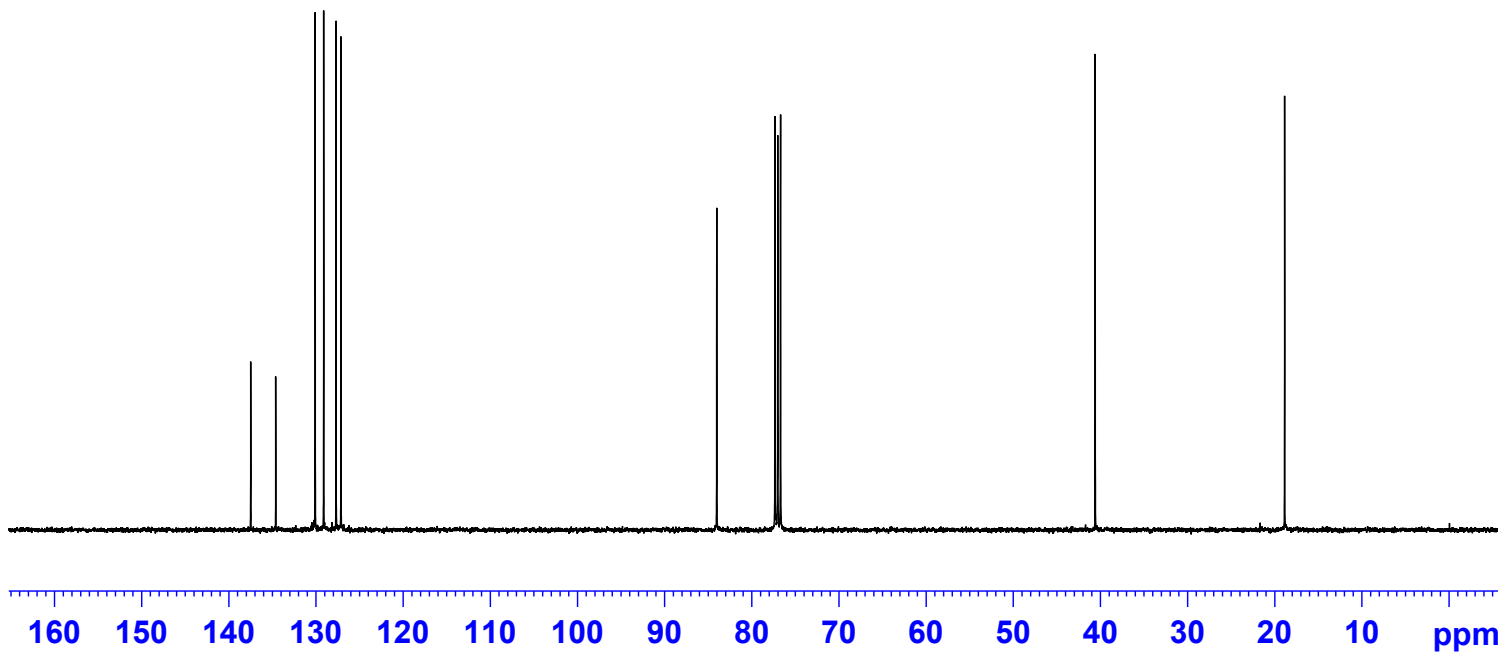

KL16(R)  
 PROTON CDC13 {E:\NMR Data} skl 44



7.2360  
 7.2163  
 7.1965  
 6.8093  
 6.8035  
 6.7888  
 6.7830  
 6.7504  
 6.7315  
 6.7008  
 6.6959  
 6.6912

4.8105  
 4.7936  
 4.7765  
 4.7591  
 4.7419  
 4.7250

3.7764  
 3.3186  
 3.3001  
 3.2838  
 3.2653  
 2.9899  
 2.9728  
 2.9551  
 2.9380

1.5389  
 1.5222

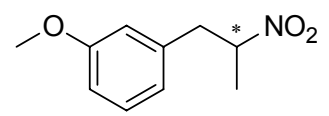

NAME Jul29-2012  
 EXPNO 10  
 PROCNO 1  
 Date\_ 20120730  
 Time\_ 3.34  
 INSTRUM spect  
 PROBHD 5 mm PABBO BB-  
 PULPROG zg30  
 TD 65536  
 SOLVENT CDC13  
 NS 32  
 DS 2  
 SWH 8223.685 Hz  
 FIDRES 0.125483 Hz  
 AQ 3.9846387 sec  
 RG 57  
 DW 60.800 usec  
 DE 6.50 usec  
 TE 300.8 K  
 D1 1.00000000 sec  
 TD0 1

===== CHANNEL f1 =====  
 NUC1 1H  
 P1 8.76 usec  
 PL1 -2.00 dB  
 PL1W 31.17179108 W  
 SFO1 400.1324710 MHz  
 SI 32768  
 SF 400.1300142 MHz  
 WDW EM  
 SSB 0  
 LB 0.30 Hz  
 GB 0  
 PC 1.00

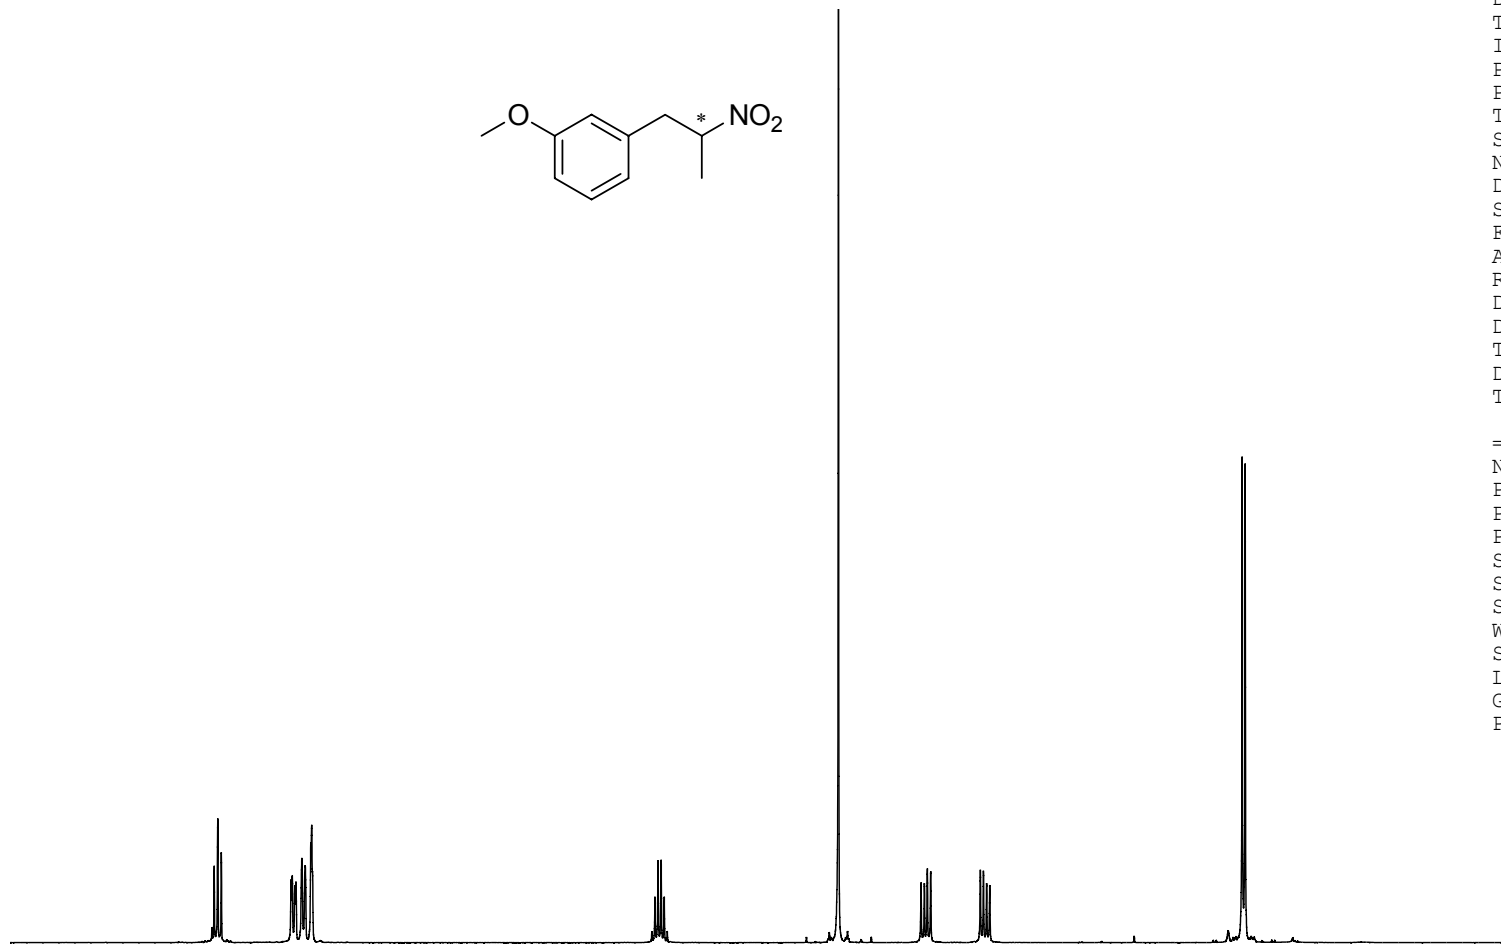

8.0 7.5 7.0 6.5 6.0 5.5 5.0 4.5 4.0 3.5 3.0 2.5 2.0 1.5 1.0 ppm

1.00 0.99 1.01 0.99 1.00 3.07 1.00 1.01 3.02

KL16(R)  
C13CPD32 CDC13 {E:\NMR Data} skl 44



NAME Jul29-2012  
EXPNO 12  
PROCNO 1  
Date\_ 20120730  
Time\_ 10.48  
INSTRUM spect  
PROBHD 5 mm PABBO BB-  
PULPROG zgpg30  
TD 65536  
SOLVENT CDC13  
NS 32  
DS 2  
SWH 24038.461 Hz  
FIDRES 0.366798 Hz  
AQ 1.3631988 sec  
RG 2050  
DW 20.800 usec  
DE 6.50 usec  
TE 301.5 K  
D1 2.00000000 sec  
D11 0.03000000 sec  
TD0 1

===== CHANNEL f1 =====  
NUC1 13C  
P1 8.50 usec  
PL1 1.00 dB  
PL1W 75.02186584 W  
SFO1 100.6228298 MHz

===== CHANNEL f2 =====  
CPDPRG2 waltz16  
NUC2 1H  
PCPD2 90.00 usec  
PL2 -2.00 dB  
PL12 18.23 dB  
PL13 19.00 dB  
PL2W 31.17179108 W  
PL12W 0.29563907 W  
PL13W 0.24760634 W  
SFO2 400.1316005 MHz  
SI 32768  
SF 100.6127690 MHz  
WDW EM  
SSB 0  
LB 1.00 Hz  
GB 0  
PC 1.40

159.89  
137.07  
129.84  
121.25  
114.84  
112.67  
84.34  
77.40  
77.08  
76.77  
55.19  
41.16  
18.83

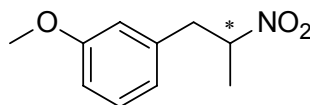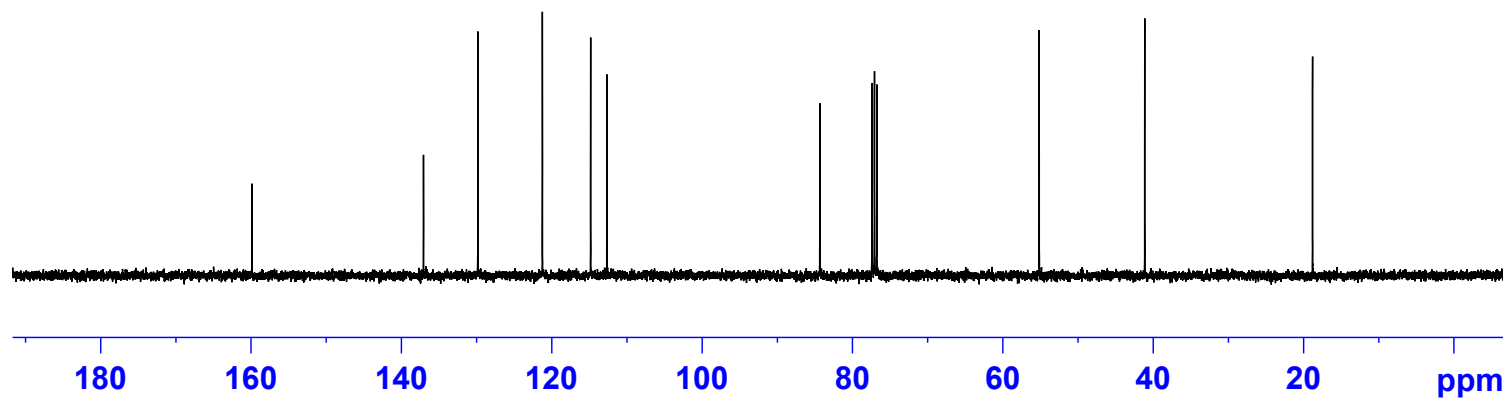

KL28 (R)  
 PROTON CDC13 {E:\NMR Data} skl 4



7.8093  
 7.6412  
 7.2616

4.8623  
 4.8475  
 4.8456  
 4.8414  
 4.8309  
 4.8268  
 4.8249  
 4.8101

3.4866  
 3.4657  
 3.4505  
 3.4297  
 3.1934  
 3.1790  
 3.1573  
 3.1429

1.6380  
 1.6213

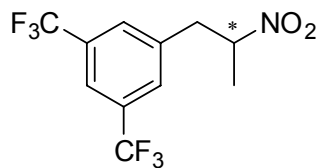

NAME Aug01-2012  
 EXPNO 15  
 PROCNO 1  
 Date\_ 20120802  
 Time\_ 5.38  
 INSTRUM spect  
 PROBHD 5 mm PABBO BB-  
 PULPROG zg30  
 TD 65536  
 SOLVENT CDC13  
 NS 44  
 DS 2  
 SWH 8223.685 Hz  
 FIDRES 0.125483 Hz  
 AQ 3.9846387 sec  
 RG 322  
 DW 60.800 usec  
 DE 6.50 usec  
 TE 300.9 K  
 D1 1.00000000 sec  
 TD0 1

===== CHANNEL f1 =====  
 NUC1 1H  
 P1 8.76 usec  
 PL1 -2.00 dB  
 PL1W 31.17179108 W  
 SFO1 400.1324710 MHz  
 SI 32768  
 SF 400.1300090 MHz  
 WDW EM  
 SSB 0  
 LB 0.30 Hz  
 GB 0  
 PC 1.00

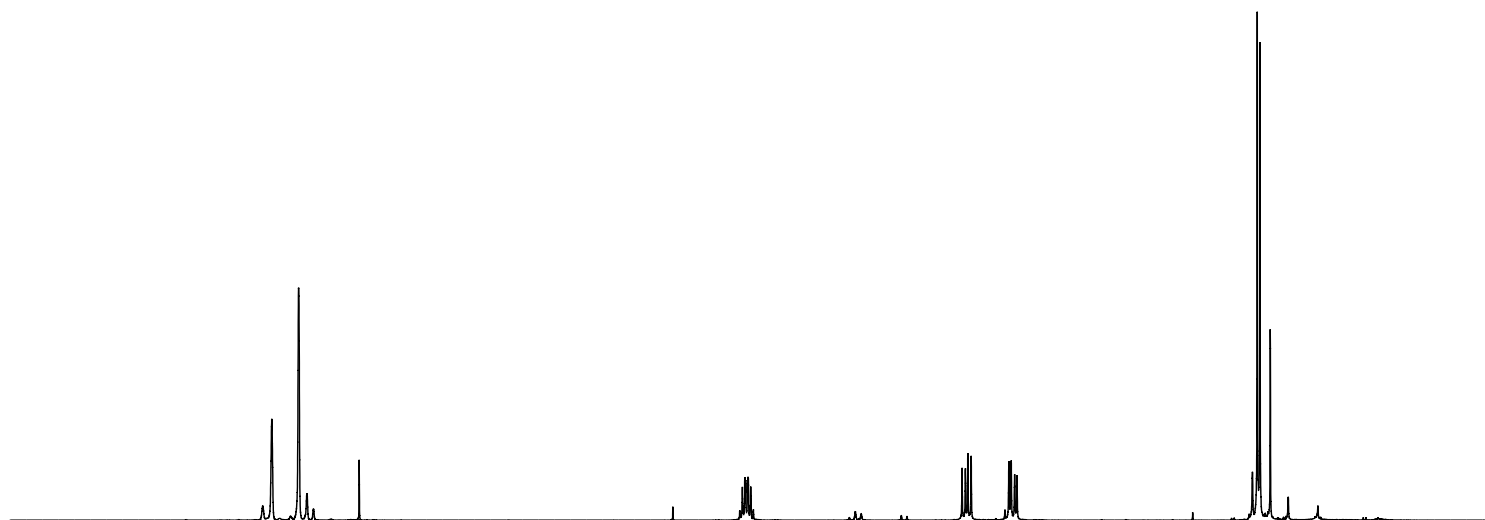

9.0 8.5 8.0 7.5 7.0 6.5 6.0 5.5 5.0 4.5 4.0 3.5 3.0 2.5 2.0 1.5 1.0 ppm

1.07  
 2.03

1.00

1.00  
 1.09

3.02

KL28 (R)  
C13CPD32 CDCl3 {E:\NMR Data} skl 4



NAME Aug01-2012  
EXPNO 17  
PROCNO 1  
Date\_ 20120802  
Time\_ 8.09  
INSTRUM spect  
PROBHD 5 mm PABBO BB-  
PULPROG zgpg30  
TD 65536  
SOLVENT CDCl3  
NS 2048  
DS 2  
SWH 24038.461 Hz  
FIDRES 0.366798 Hz  
AQ 1.3631988 sec  
RG 2050  
DW 20.800 usec  
DE 6.50 usec  
TE 302.2 K  
D1 2.00000000 sec  
D11 0.03000000 sec  
TD0 1

===== CHANNEL f1 =====  
NUC1 13C  
P1 8.50 usec  
PL1 1.00 dB  
PL1W 75.02186584 W  
SFO1 100.6228298 MHz

===== CHANNEL f2 =====  
CPDPRG2 waltz16  
NUC2 1H  
PCPD2 90.00 usec  
PL2 -2.00 dB  
PL12 18.23 dB  
PL13 19.00 dB  
PL2W 31.17179108 W  
PL12W 0.29563907 W  
PL13W 0.24760634 W  
SFO2 400.1316005 MHz  
SI 32768  
SF 100.6127634 MHz  
WDW EM  
SSB 0  
LB 1.00 Hz  
GB 0  
PC 1.40

138.06  
132.83  
132.50  
132.16  
131.83  
129.24  
129.20  
124.45  
121.82  
121.78  
121.74  
121.70  
121.67

83.59  
77.36  
77.05  
76.73

40.39

19.12

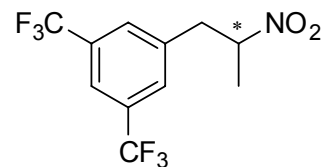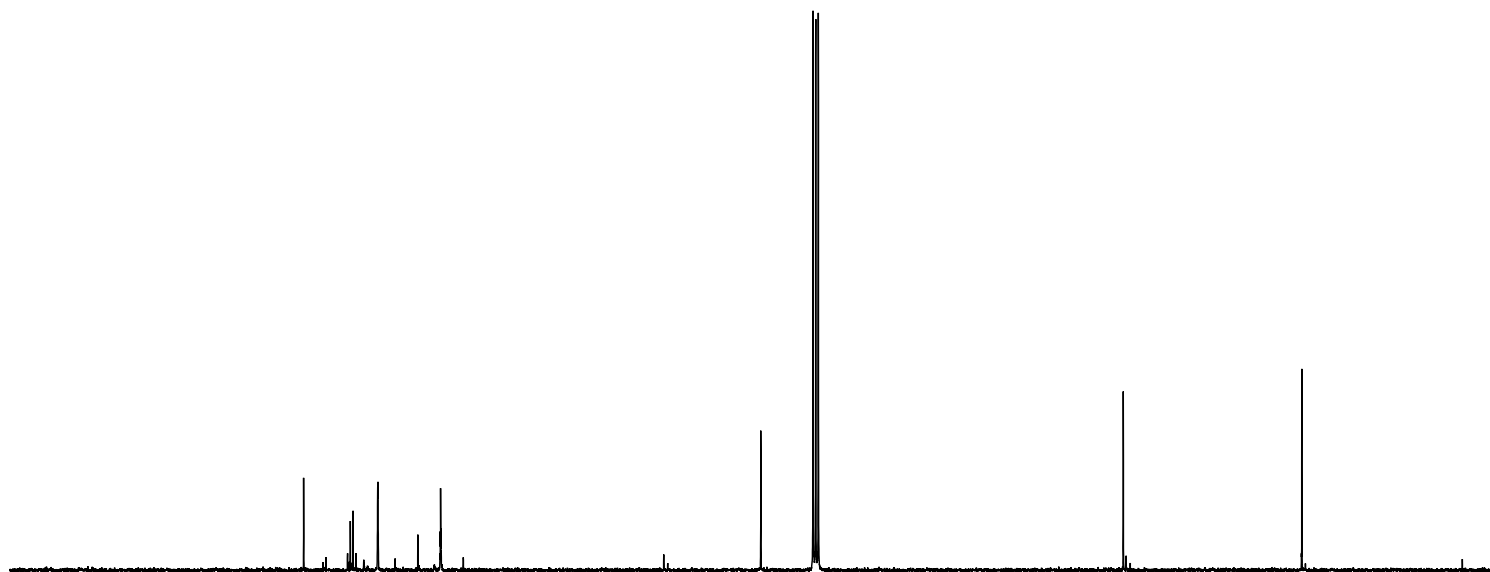

160 150 140 130 120 110 100 90 80 70 60 50 40 30 20 10 ppm



KL28 (R)  
f19cpd.medchem CDC13 {E:\NMR Data} sk1 4



NAME Aug01-2012  
EXPNO 18  
PROCNO 1  
Date\_ 20120802  
Time\_ 8.20  
INSTRUM spect  
PROBHD 5 mm PABBO BB-  
PULPROG zgdc60  
TD 131072  
SOLVENT CDC13  
NS 128  
DS 4  
SWH 93750.000 Hz  
FIDRES 0.715256 Hz  
AQ 0.6991007 sec  
RG 912  
DW 5.333 usec  
DE 6.50 usec  
TE 302.2 K  
D1 3.0000000 sec  
D11 0.0300000 sec  
TD0 1

===== CHANNEL f1 =====  
NUC1 19F  
P1 14.00 usec  
PL1 1.50 dB  
PL1W 35.56558990 W  
SFO1 376.4569512 MHz

===== CHANNEL f2 =====  
CPDPRG2 waltz16  
NUC2 1H  
PCPD2 90.00 usec  
PL2 -2.00 dB  
PL12 18.23 dB  
PL2W 31.17179108 W  
PL12W 0.29563907 W  
SFO2 400.1316005 MHz  
SI 65536  
SF 376.4983660 MHz  
WDW EM  
SSB 0  
LB 0.87 Hz  
GB 0  
PC 1.00

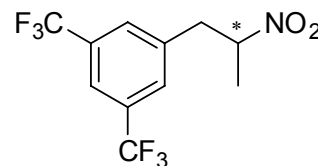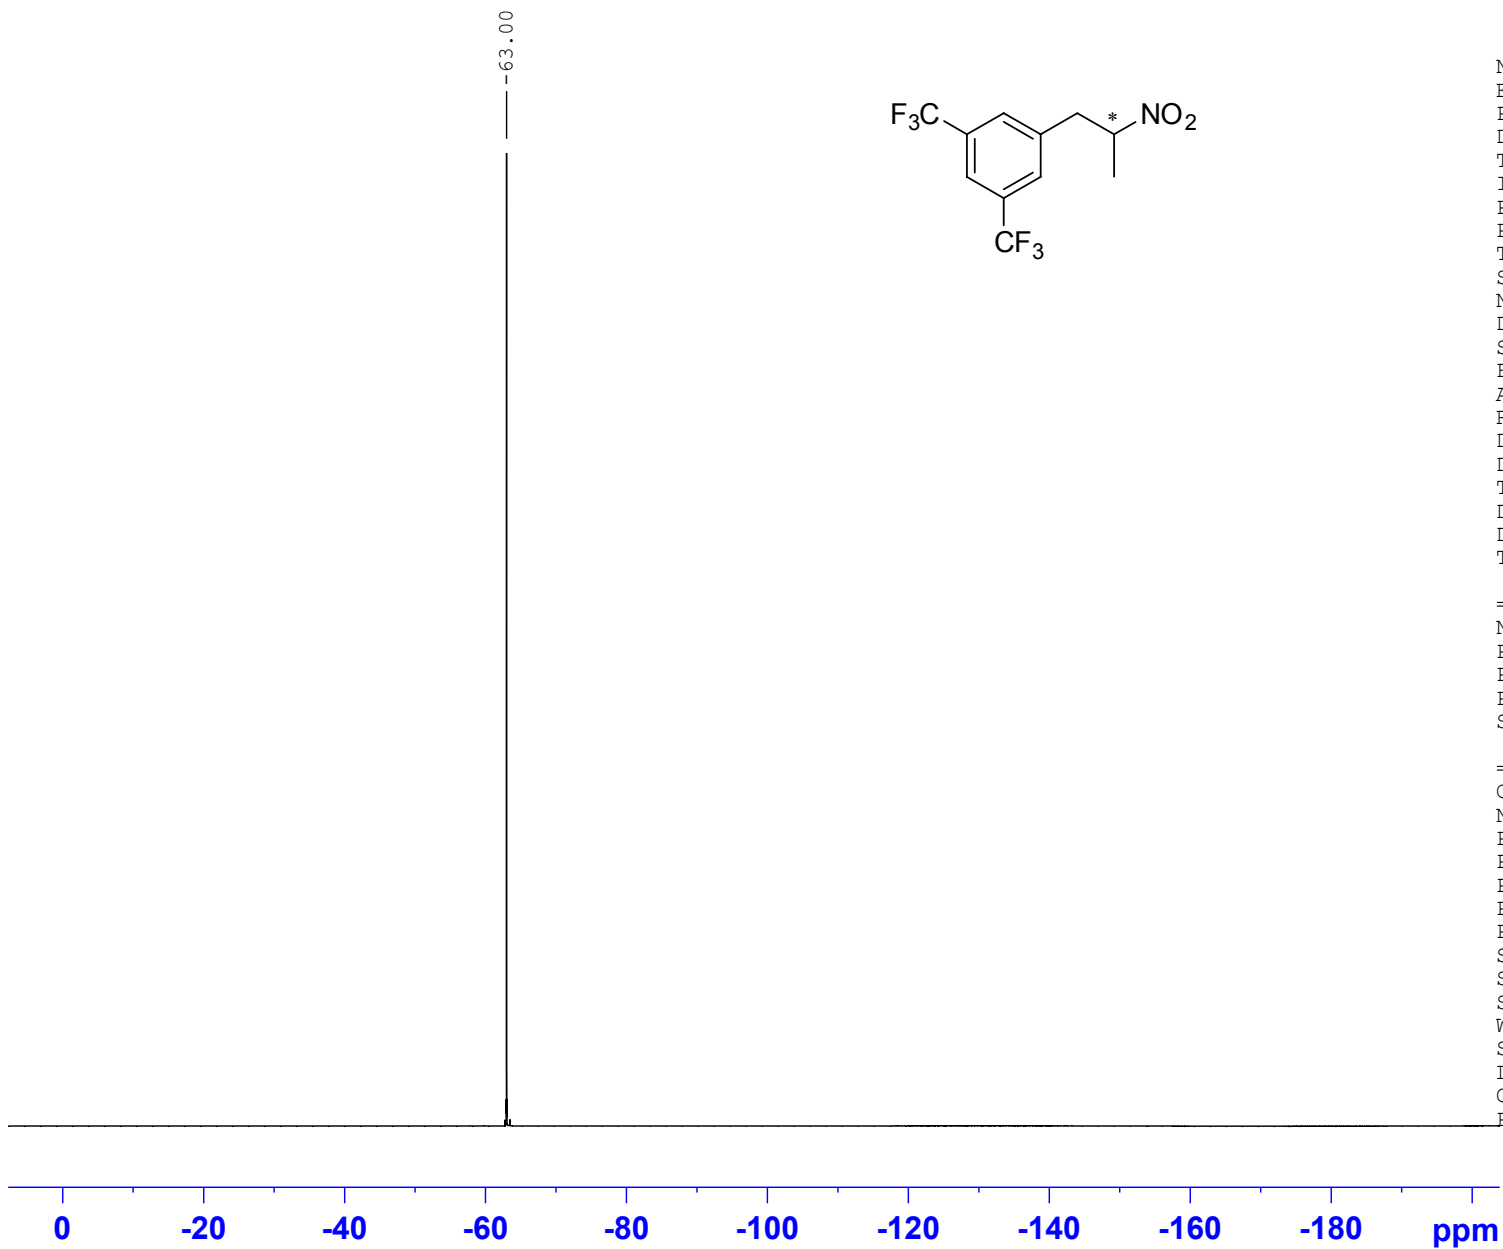

KL08(R)  
 PROTON CDCl3 {E:\NMR Data} skl 10



NAME Jul27-2012  
 EXPNO 4  
 PROCNO 1  
 Date\_ 20120727  
 Time\_ 13.59  
 INSTRUM spect  
 PROBHD 5 mm PABBO BB-  
 PULPROG zg30  
 TD 65536  
 SOLVENT CDCl3  
 NS 32  
 DS 2  
 SWH 8223.685 Hz  
 FIDRES 0.125483 Hz  
 AQ 3.9846387 sec  
 RG 322  
 DW 60.800 usec  
 DE 6.50 usec  
 TE 301.4 K  
 D1 1.00000000 sec  
 TD0 1

===== CHANNEL f1 =====  
 NUC1 1H  
 P1 8.76 usec  
 PL1 -2.00 dB  
 PL1W 31.17179108 W  
 SFO1 400.1324710 MHz  
 SI 32768  
 SF 400.1300086 MHz  
 WDW EM  
 SSB 0  
 LB 0.30 Hz  
 GB 0  
 PC 1.00

7.2623  
 6.8133  
 6.7930  
 6.7200  
 6.7150  
 6.6996  
 6.6947  
 6.6609  
 6.6561

4.7804  
 4.7635  
 4.7457  
 4.7286

3.8639  
 3.8573

3.2921  
 3.2734  
 3.2569  
 3.2382  
 2.9799  
 2.9632  
 2.9448  
 2.9280

1.5514  
 1.5348

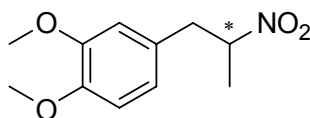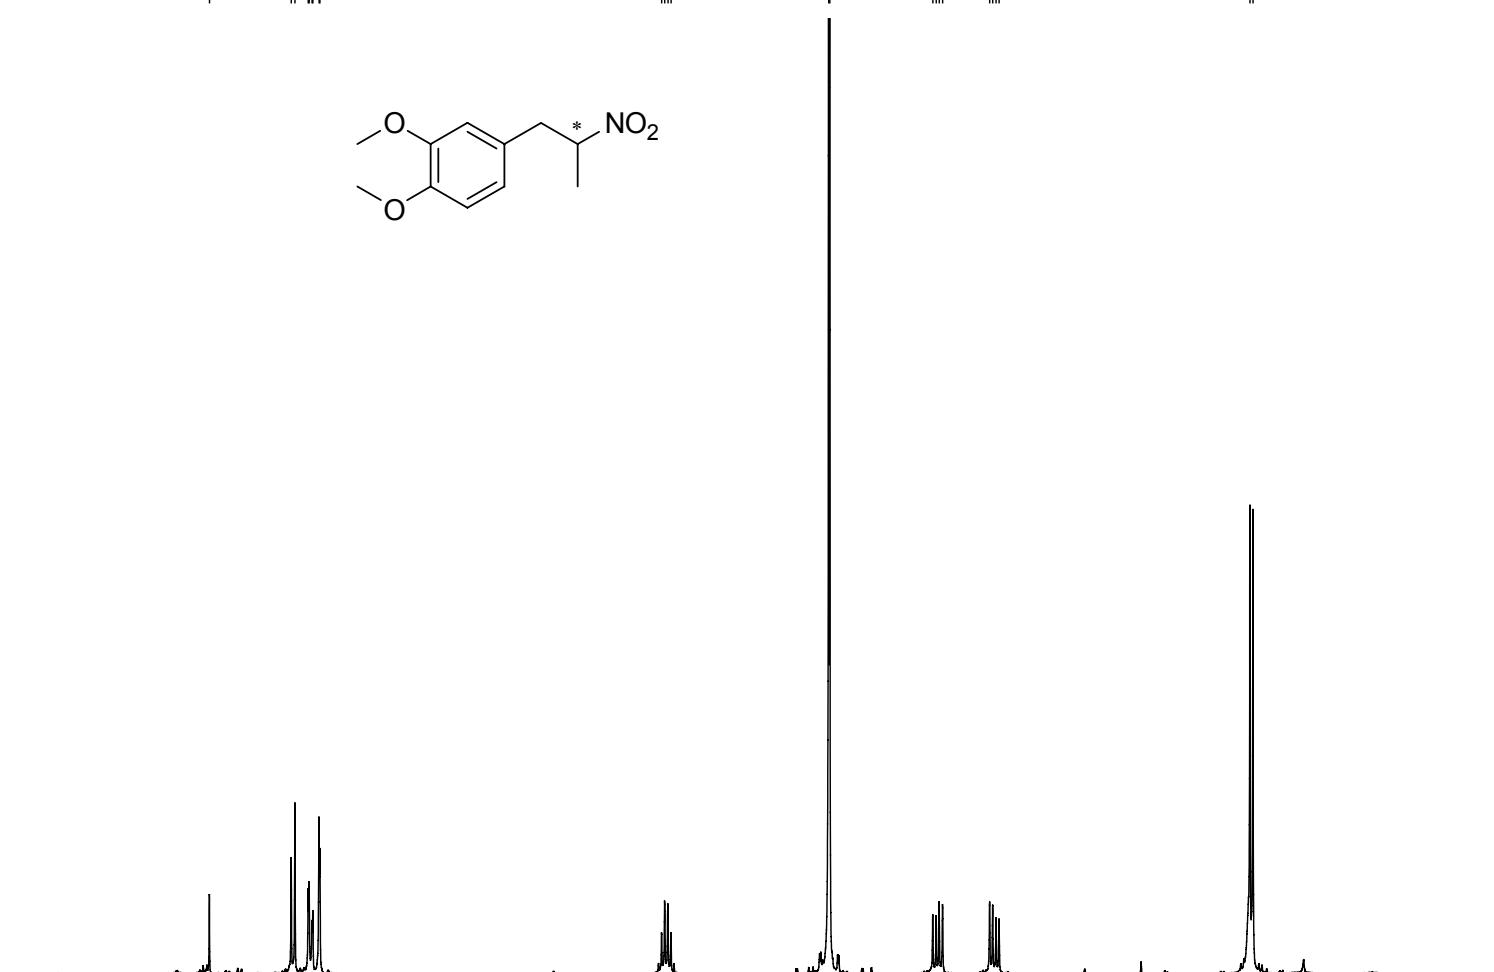

8.0 7.5 7.0 6.5 6.0 5.5 5.0 4.5 4.0 3.5 3.0 2.5 2.0 1.5 1.0 ppm

0.94  
 0.96  
 0.93

1.02

3.19  
 2.92

1.00

1.04

3.01

KL08 (R)  
C13CPD32 CDC13 {E:\NMR Data} skl 8

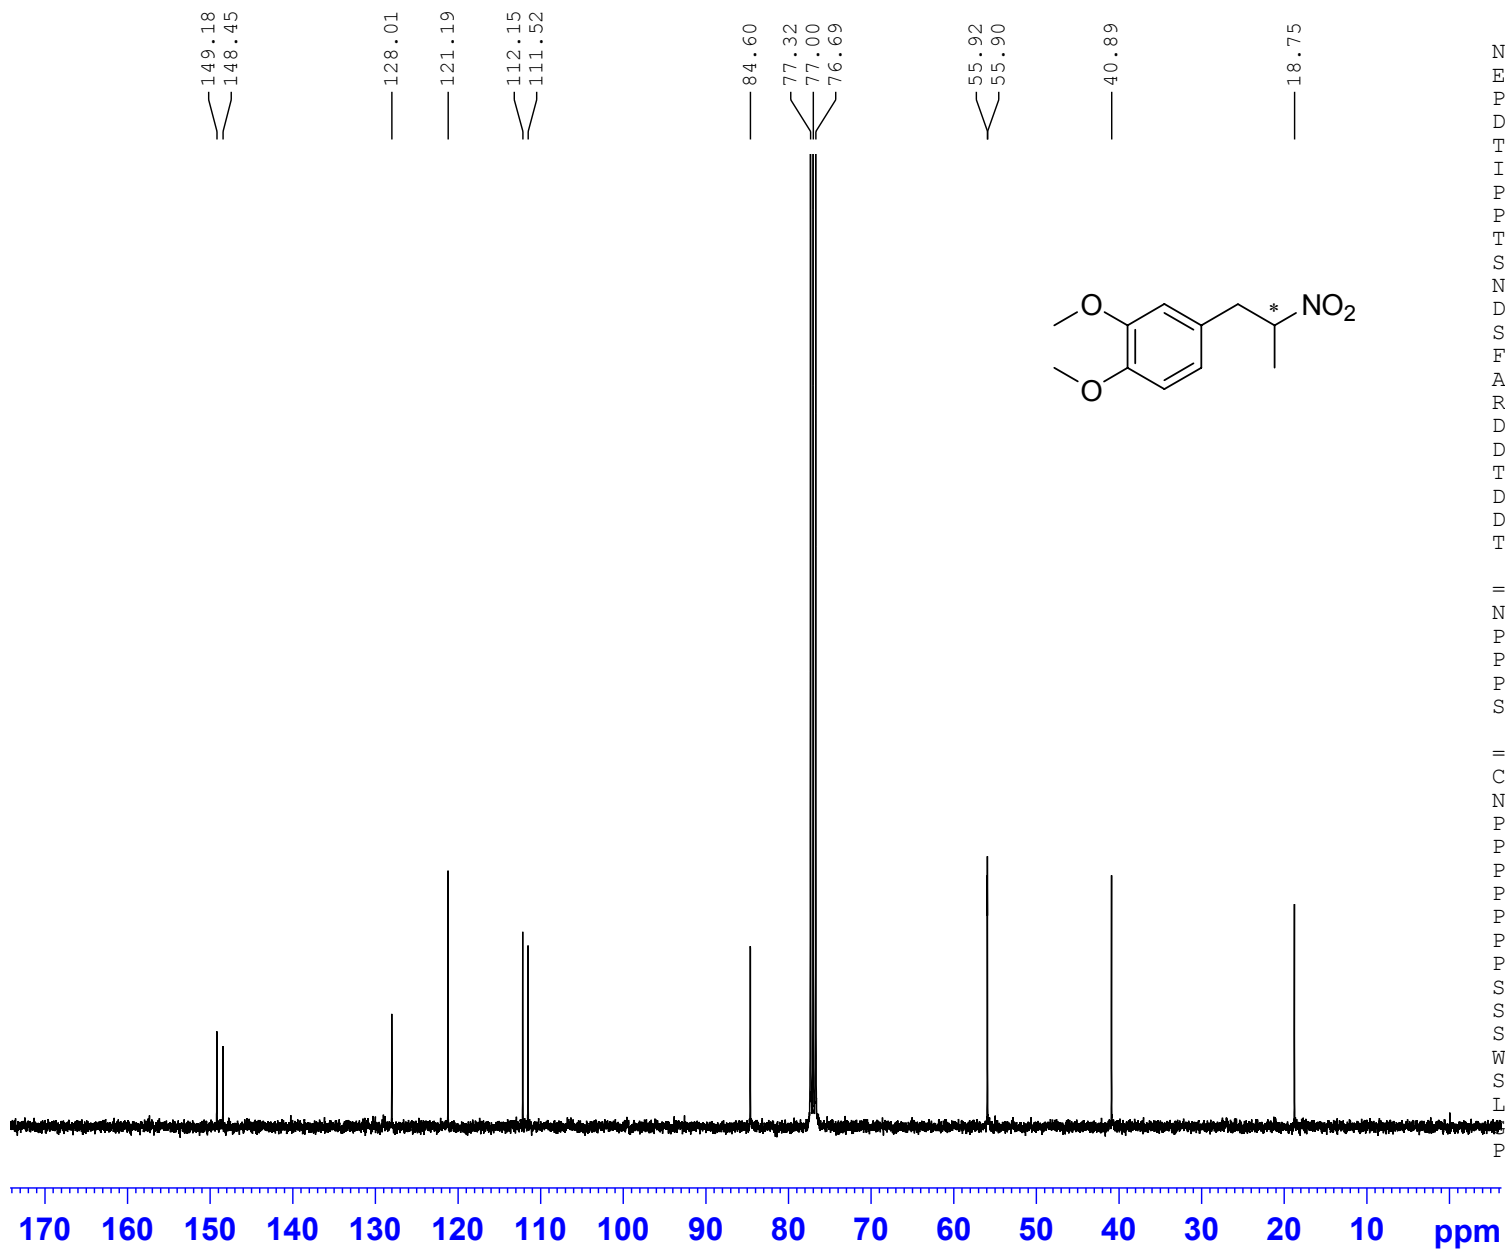

NAME Jul27-2012  
EXPNO 12  
PROCNO 1  
Date\_ 20120728  
Time\_ 11.09  
INSTRUM spect  
PROBHD 5 mm PABBO BB-  
PULPROG zgpg30  
TD 65536  
SOLVENT CDC13  
NS 1024  
DS 2  
SWH 24038.461 Hz  
FIDRES 0.366798 Hz  
AQ 1.3631988 sec  
RG 2050  
DW 20.800 usec  
DE 6.50 usec  
TE 303.8 K  
D1 2.00000000 sec  
D11 0.03000000 sec  
TD0 1

==== CHANNEL f1 =====  
NUC1 13C  
P1 8.50 usec  
PL1 1.00 dB  
PL1W 75.02186584 W  
SFO1 100.6228298 MHz

==== CHANNEL f2 =====  
CPDPRG2 waltz16  
NUC2 1H  
PCPD2 90.00 usec  
PL2 -2.00 dB  
PL12 18.23 dB  
PL13 19.00 dB  
PL2W 31.17179108 W  
PL12W 0.29563907 W  
PL13W 0.24760634 W  
SFO2 400.1316005 MHz  
SI 32768  
SF 100.6127690 MHz  
WDW EM  
SSB 0  
LB 1.00 Hz  
GB 0  
PC 1.40

KL06(R)

PROTON CDC13 {E:\NMR Data} skl 9

7.2572  
7.0847  
7.0635  
6.8583  
6.8512  
6.8298  
6.8028

4.7546  
4.7376  
4.7206  
4.7036

3.7842  
3.2793  
3.2607  
3.2442  
3.2255  
2.9797  
2.9629  
2.9445  
2.9277

1.5372  
1.5207

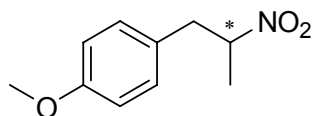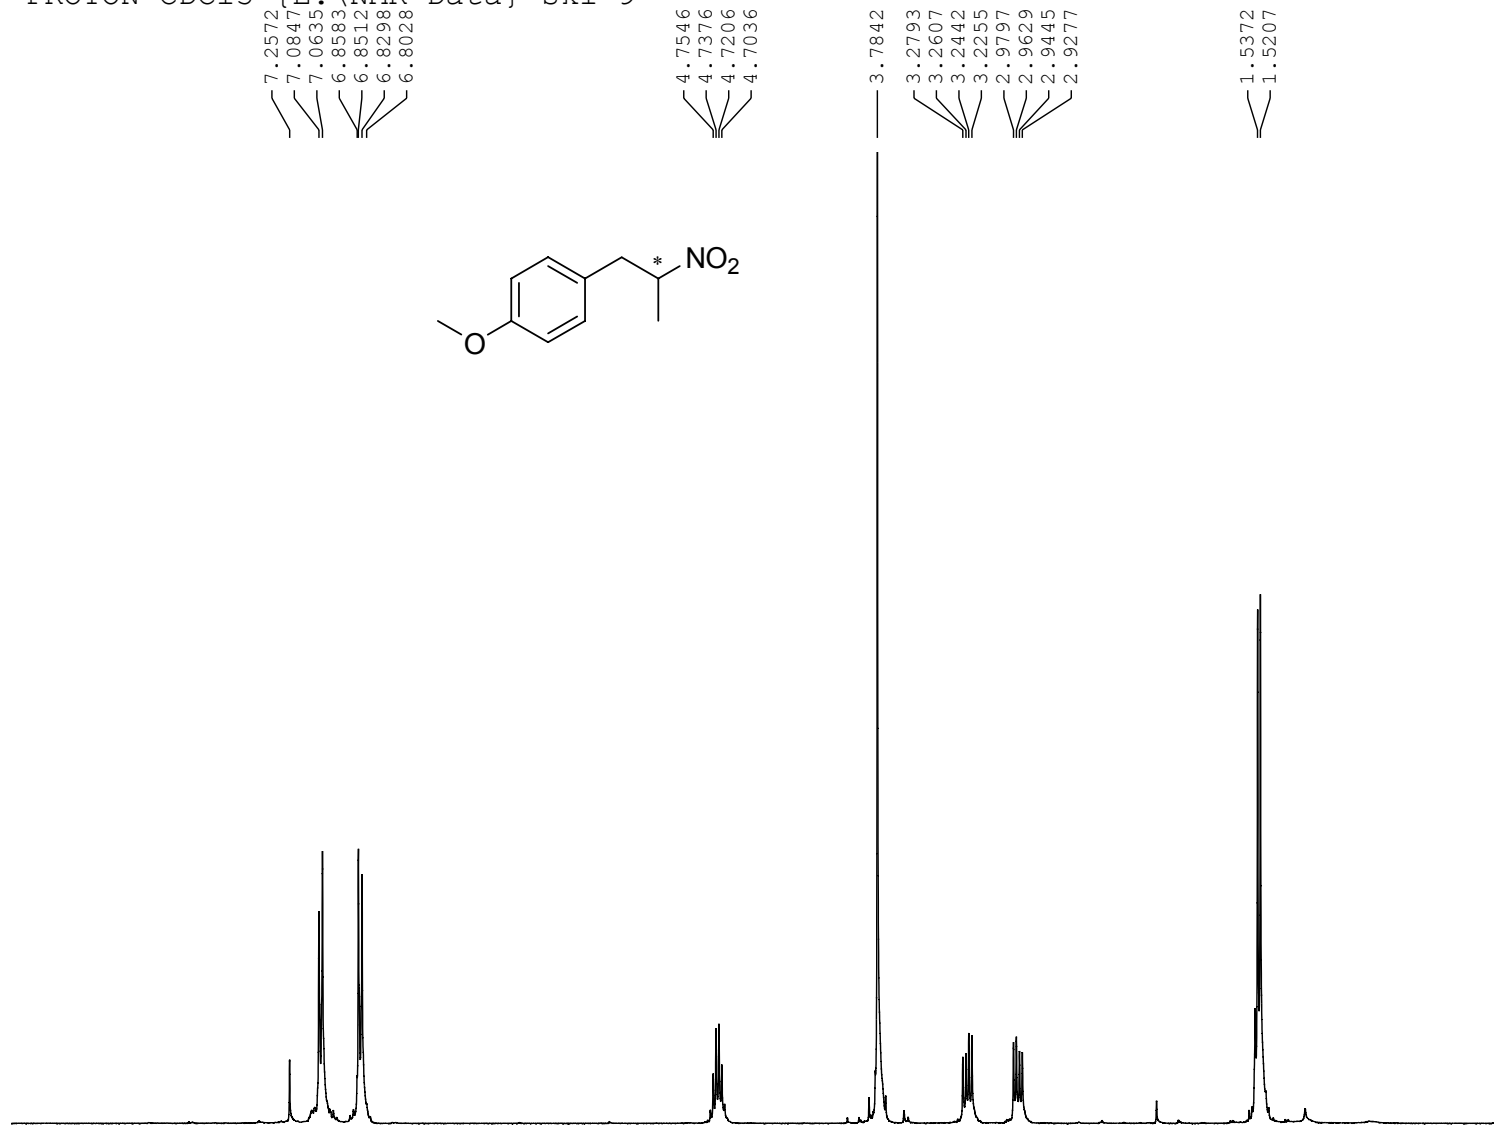

NAME Jul27-2012  
EXPNO 3  
PROCNO 1  
Date\_ 20120727  
Time\_ 13.49  
INSTRUM spect  
PROBHD 5 mm PABBO BB-  
PULPROG zg30  
TD 65536  
SOLVENT CDC13  
NS 32  
DS 2  
SWH 8223.685 Hz  
FIDRES 0.125483 Hz  
AQ 3.9846387 sec  
RG 322  
DW 60.800 usec  
DE 6.50 usec  
TE 301.5 K  
D1 1.00000000 sec  
TD0 1

===== CHANNEL f1 =====  
NUC1 1H  
P1 8.76 usec  
PL1 -2.00 dB  
PL1W 31.17179108 W  
SFO1 400.1324710 MHz  
SI 32768  
SF 400.1300108 MHz  
WDW EM  
SSB 0  
LB 0.30 Hz  
GB 0  
PC 1.00

8.5 8.0 7.5 7.0 6.5 6.0 5.5 5.0 4.5 4.0 3.5 3.0 2.5 2.0 1.5 1.0 ppm

2.10  
2.03

1.00

3.09

1.04

1.03

3.02

KL06(R)  
C13CPD CDC13 {E:\NMR Data} skl 6



NAME Jul27-2012  
EXPNO 7  
PROCNO 1  
Date\_ 20120728  
Time\_ 8.19  
INSTRUM spect  
PROBHD 5 mm PABBO BB-  
PULPROG zgpg30  
TD 65536  
SOLVENT CDC13  
NS 2000  
DS 4  
SWH 24038.461 Hz  
FIDRES 0.366798 Hz  
AQ 1.3631988 sec  
RG 2050  
DW 20.800 usec  
DE 6.50 usec  
TE 303.8 K  
D1 2.00000000 sec  
D11 0.03000000 sec  
TD0 1

===== CHANNEL f1 =====  
NUC1 13C  
P1 8.50 usec  
PL1 1.00 dB  
PL1W 75.02186584 W  
SFO1 100.6228298 MHz

===== CHANNEL f2 =====  
CPDPRG2 waltz16  
NUC2 1H  
PCPD2 90.00 usec  
PL2 -2.00 dB  
PL12 18.23 dB  
PL13 19.00 dB  
PL2W 31.17179108 W  
PL12W 0.29563907 W  
PL13W 0.24760634 W  
SFO2 400.1316005 MHz  
SI 32768  
SF 100.6127663 MHz  
WDW EM  
SSB 0  
LB 1.00 Hz  
GB 0  
PC 1.40

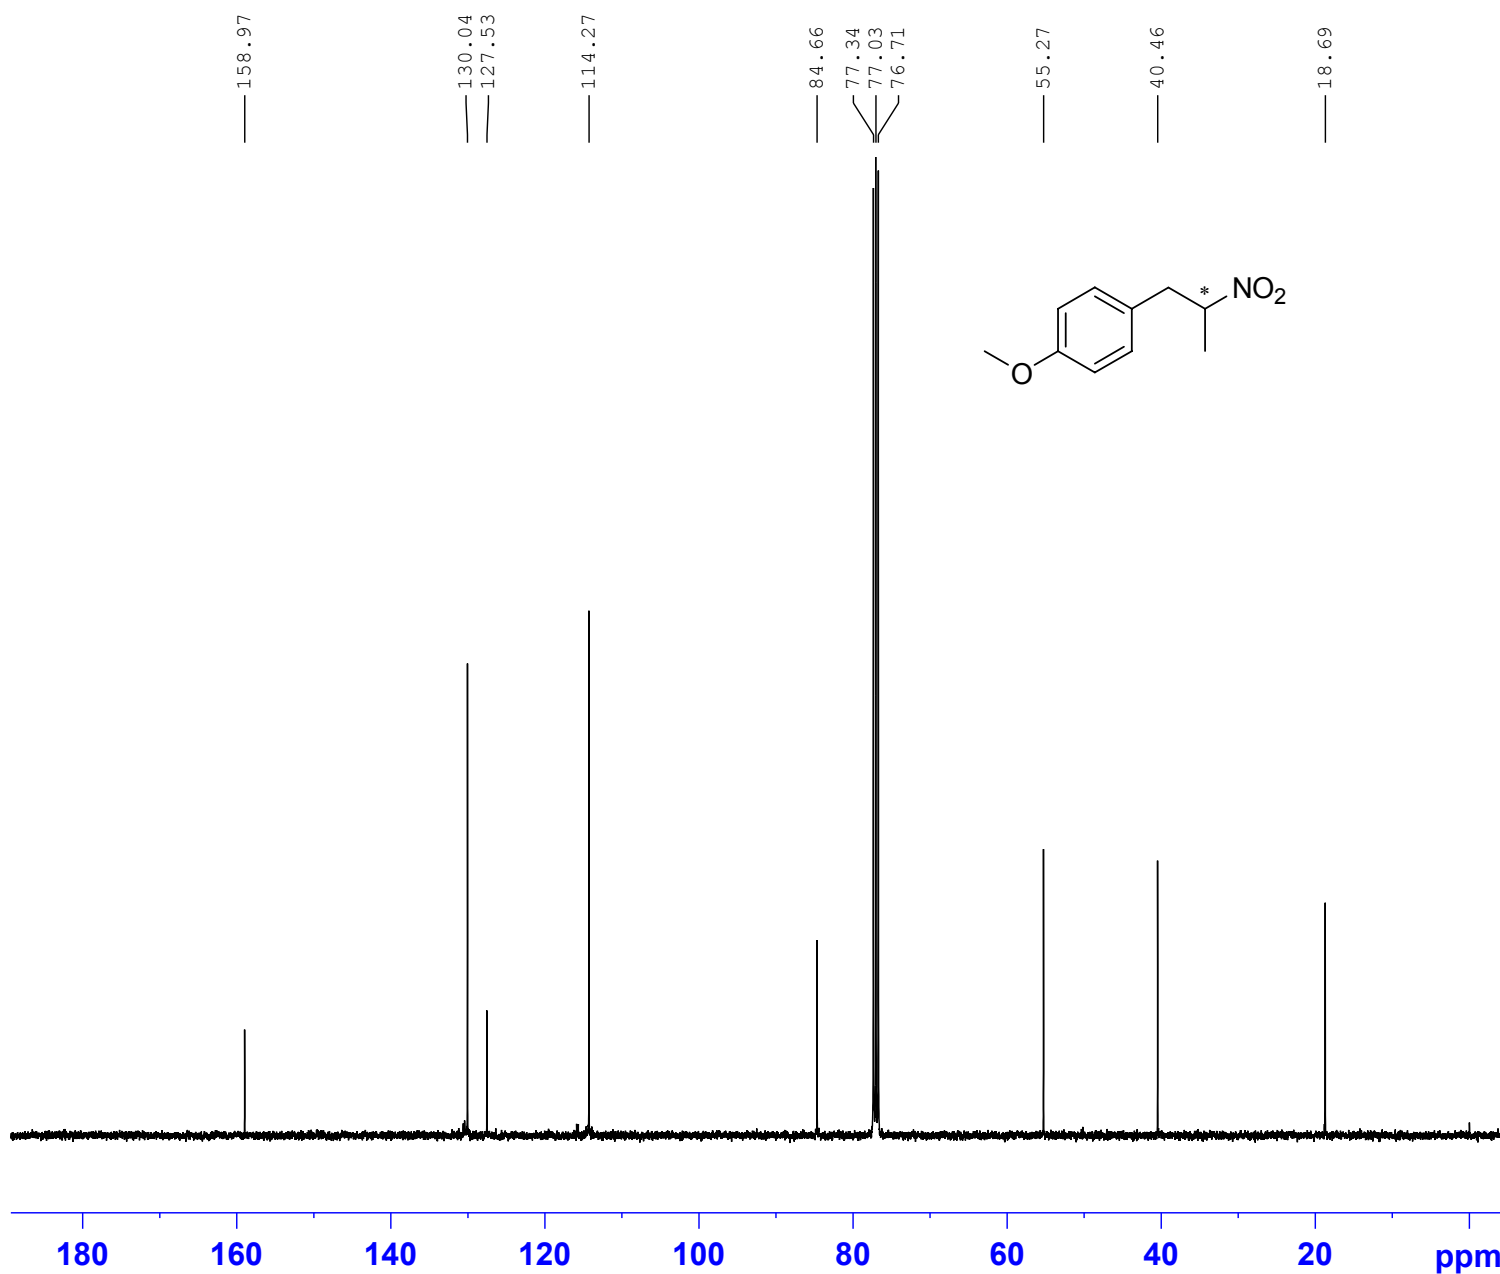

KL07(R)  
 PROTON CDCl3 {E:\NMR Data} skl 7



7.2590  
 7.1454  
 7.1402  
 7.1320  
 7.1241  
 7.1158  
 7.1108  
 7.0295  
 7.0224  
 7.0170  
 7.0009  
 6.9956  
 6.9842  
 6.9793

4.7719  
 4.7554  
 4.7386  
 4.7363  
 4.7196

3.3116  
 3.2921  
 3.2761  
 3.2567  
 3.0212  
 3.0052  
 2.9858  
 2.9698

1.5593  
 1.5431

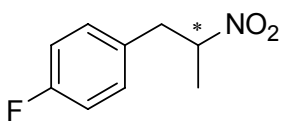

NAME Jul27-2012  
 EXPNO 1  
 PROCNO 1  
 Date\_ 20120727  
 Time\_ 11.08  
 INSTRUM spect  
 PROBHD 5 mm PABBO BB-  
 PULPROG zg30  
 TD 65536  
 SOLVENT CDCl3  
 NS 32  
 DS 2  
 SWH 8223.685 Hz  
 FIDRES 0.125483 Hz  
 AQ 3.9846387 sec  
 RG 512  
 DW 60.800 usec  
 DE 6.50 usec  
 TE 301.0 K  
 D1 1.00000000 sec  
 TD0 1

===== CHANNEL f1 =====  
 NUC1 1H  
 P1 8.76 usec  
 PL1 -2.00 dB  
 PL1W 31.17179108 W  
 SFO1 400.1324710 MHz  
 SI 32768  
 SF 400.1300098 MHz  
 WDW EM  
 SSB 0  
 LB 0.30 Hz  
 GB 0  
 PC 1.00

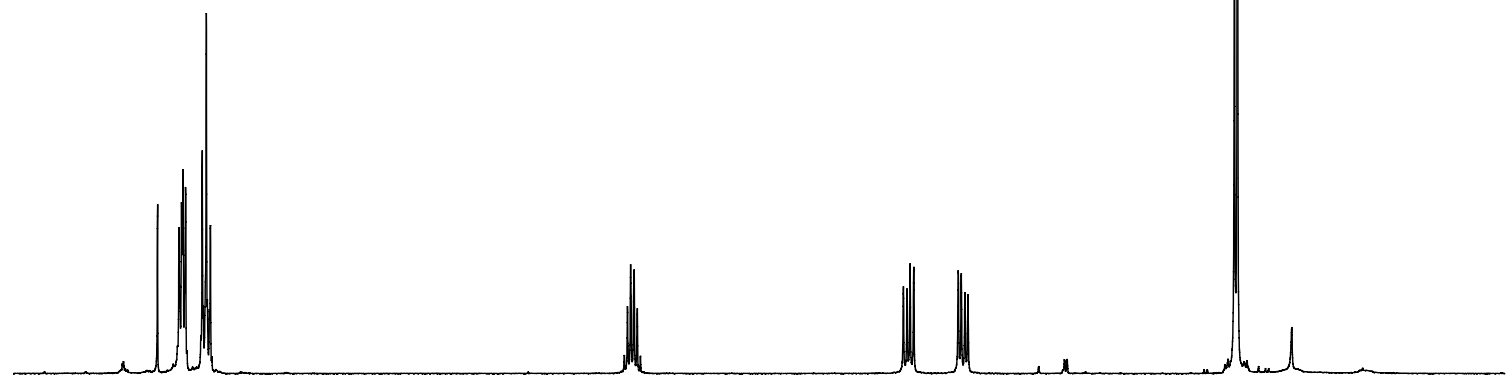

7.5 7.0 6.5 6.0 5.5 5.0 4.5 4.0 3.5 3.0 2.5 2.0 1.5 1.0 ppm

2.03  
 1.94

1.00

1.01  
 1.01

3.74

KL07(R)  
C13CPD32 CDC13 {E:\NMR Data} sk1 7



NAME Jul27-2012  
EXPNO 9  
PROCNO 1  
Date\_ 20120728  
Time\_ 9.23  
INSTRUM spect  
PROBHD 5 mm PABBO BB-  
PULPROG zgpg30  
TD 65536  
SOLVENT CDC13  
NS 1024  
DS 2  
SWH 24038.461 Hz  
FIDRES 0.366798 Hz  
AQ 1.3631988 sec  
RG 2050  
DW 20.800 usec  
DE 6.50 usec  
TE 303.8 K  
D1 2.00000000 sec  
D11 0.03000000 sec  
TD0 1

=====  
CHANNEL f1  
NUC1 13C  
P1 8.50 usec  
PL1 1.00 dB  
PL1W 75.02186584 W  
SFO1 100.6228298 MHz

=====  
CHANNEL f2  
CPDPRG2 waltz16  
NUC2 1H  
PCPD2 90.00 usec  
PL2 -2.00 dB  
PL12 18.23 dB  
PL13 19.00 dB  
PL2W 31.17179108 W  
PL12W 0.29563907 W  
PL13W 0.24760634 W  
SFO2 400.1316005 MHz  
SI 32768  
SF 100.6127658 MHz  
WDW EM  
SSB 0  
LB 1.00 Hz  
GB 0  
PC 1.40

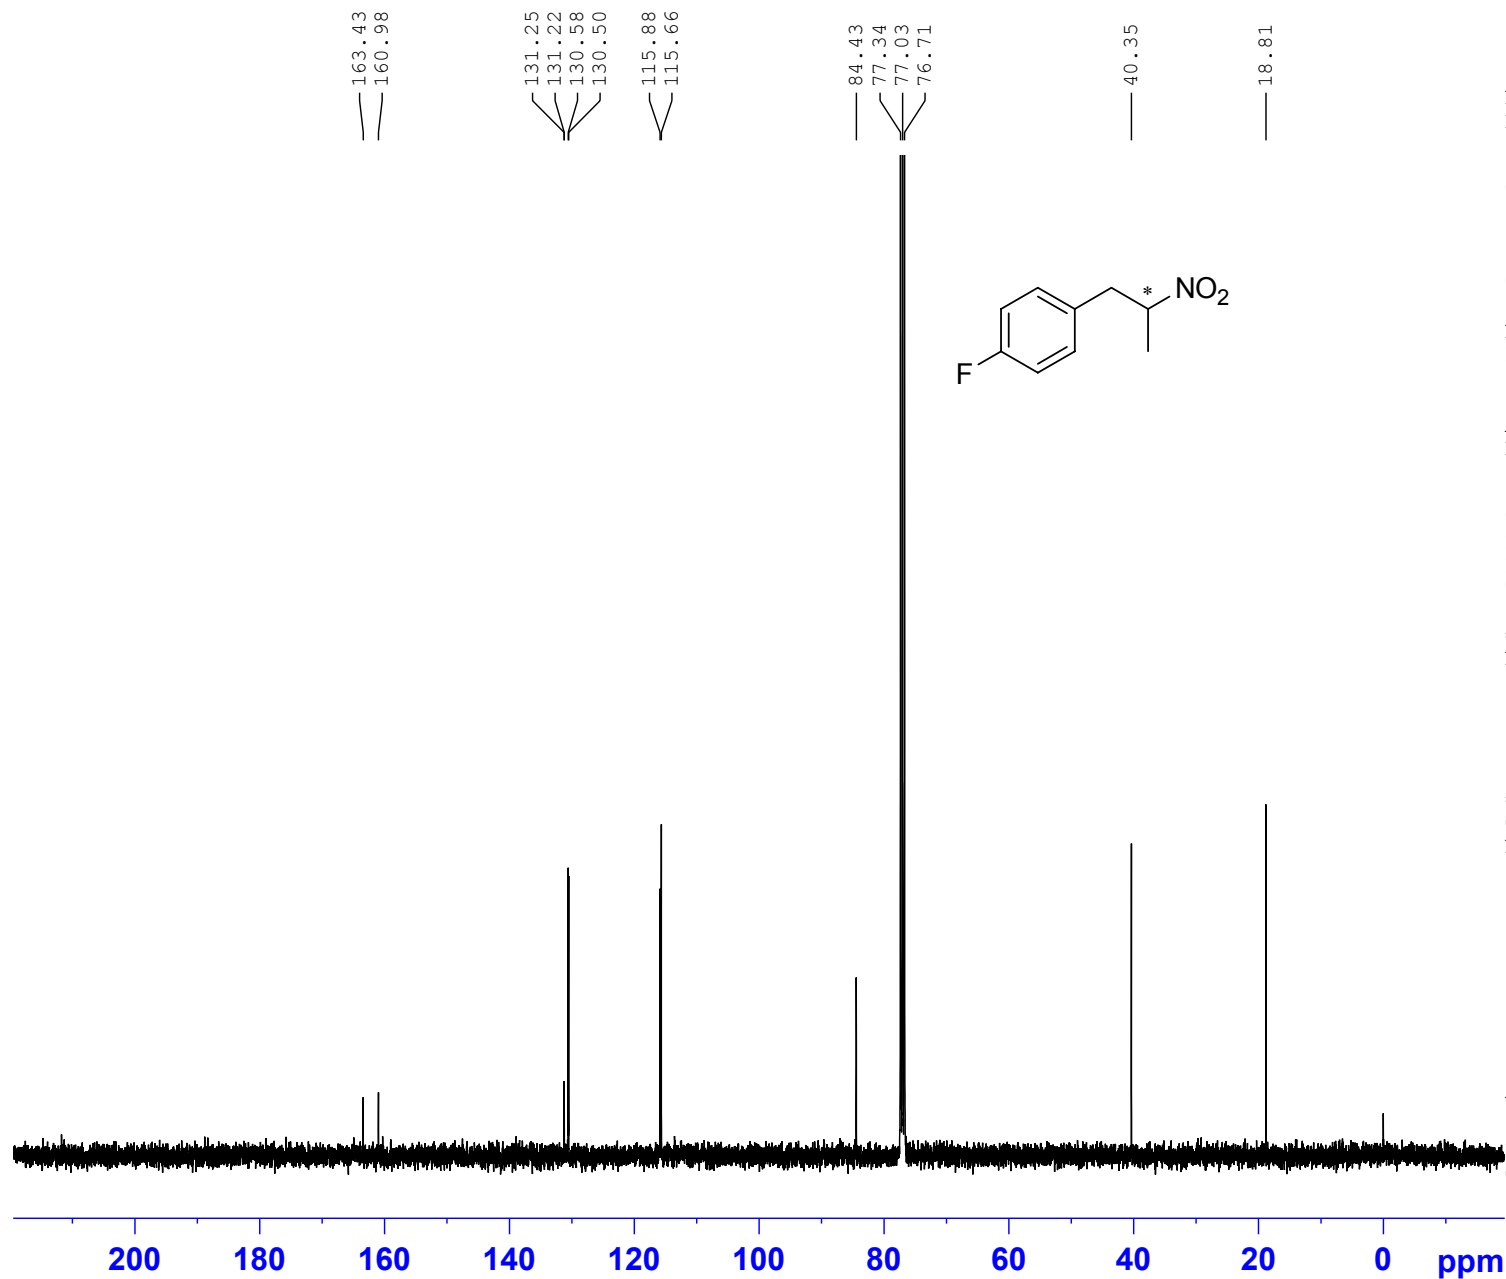

KL07(R)  
f19cpd.medchem CDC13 {E:\NMR Data} sk1 7

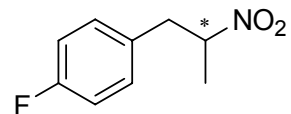

NAME Jul27-2012  
EXPNO 10  
PROCNO 1  
Date\_ 20120728  
Time\_ 9.33  
INSTRUM spect  
PROBHD 5 mm PABBO BB-  
PULPROG zgdc60  
TD 131072  
SOLVENT CDC13  
NS 128  
DS 4  
SWH 93750.000 Hz  
FIDRES 0.715256 Hz  
AQ 0.6991007 sec  
RG 1030  
DW 5.333 usec  
DE 6.50 usec  
TE 303.9 K  
D1 3.00000000 sec  
D11 0.03000000 sec  
TD0 1

==== CHANNEL f1 =====  
NUC1 19F  
P1 14.00 usec  
PL1 1.50 dB  
PL1W 35.56558990 W  
SFO1 376.4569512 MHz

==== CHANNEL f2 =====  
CPDPRG2 waltz16  
NUC2 1H  
PCPD2 90.00 usec  
PL2 -2.00 dB  
PL12 18.23 dB  
PL2W 31.17179108 W  
PL12W 0.29563907 W  
SFO2 400.1316005 MHz  
SI 65536  
SF 376.4983660 MHz  
WDW EM  
SSB 0  
LB 0.87 Hz  
GB 0  
PC 1.00

--115.01

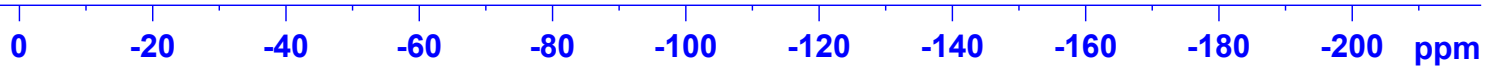



KL09(R)  
 PROTON CDCl3 {E:\NMR Data} skl 8



7.3028  
 7.2967  
 7.2920  
 7.2804  
 7.2757  
 7.2695  
 7.2587  
 7.1068  
 7.0859

4.7725  
 4.7559  
 4.7535  
 4.7392  
 4.7367  
 4.7202

3.3099  
 3.2904  
 3.2745  
 3.2551  
 3.0161  
 3.0000  
 2.9808  
 2.9647

1.5595  
 1.5429

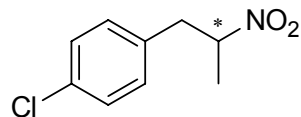

NAME Jul27-2012  
 EXPNO 2  
 PROCNO 1  
 Date\_ 20120727  
 Time\_ 11.16  
 INSTRUM spect  
 PROBHD 5 mm PABBO BB-  
 PULPROG zg30  
 TD 65536  
 SOLVENT CDCl3  
 NS 32  
 DS 2  
 SWH 8223.685 Hz  
 FIDRES 0.125483 Hz  
 AQ 3.9846387 sec  
 RG 406  
 DW 60.800 usec  
 DE 6.50 usec  
 TE 301.0 K  
 D1 1.00000000 sec  
 TD0 1

===== CHANNEL f1 =====  
 NUC1 1H  
 P1 8.76 usec  
 PL1 -2.00 dB  
 PL1W 31.17179108 W  
 SFO1 400.1324710 MHz  
 SI 32768  
 SF 400.1300102 MHz  
 WDW EM  
 SSB 0  
 LB 0.30 Hz  
 GB 0  
 PC 1.00

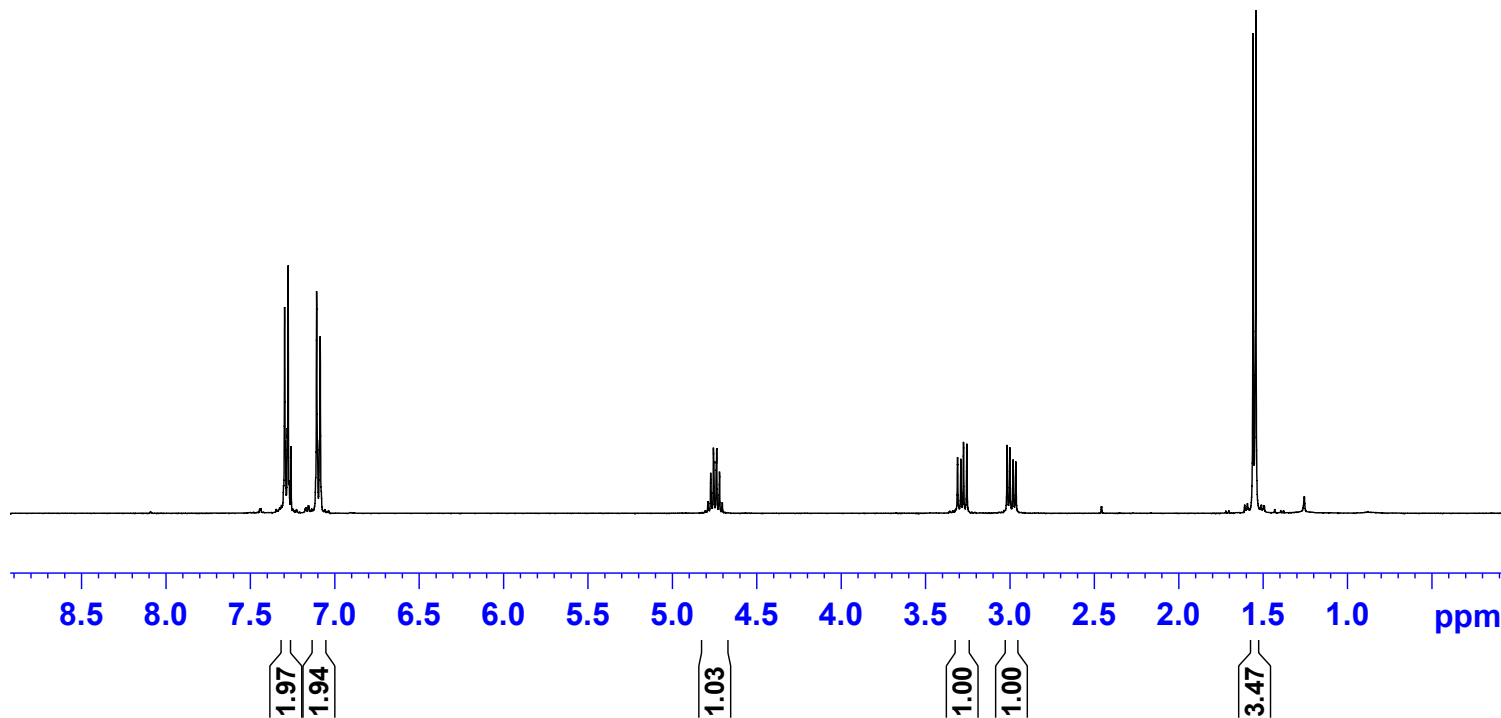

KL09(R)  
C13CPD32 CDC13 {E:\NMR Data} skl 9



NAME Jul27-2012  
EXPNO 14  
PROCNO 1  
Date\_ 20120728  
Time\_ 12.43  
INSTRUM spect  
PROBHD 5 mm PABBO BB-  
PULPROG zgpg30  
TD 65536  
SOLVENT CDC13  
NS 1024  
DS 2  
SWH 24038.461 Hz  
FIDRES 0.366798 Hz  
AQ 1.3631988 sec  
RG 2050  
DW 20.800 usec  
DE 6.50 usec  
TE 303.9 K  
D1 2.00000000 sec  
D11 0.03000000 sec  
TD0 1

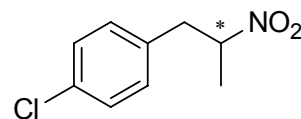

133.97  
133.49  
130.32  
129.05

84.20  
77.34  
77.03  
76.71

40.45

18.84

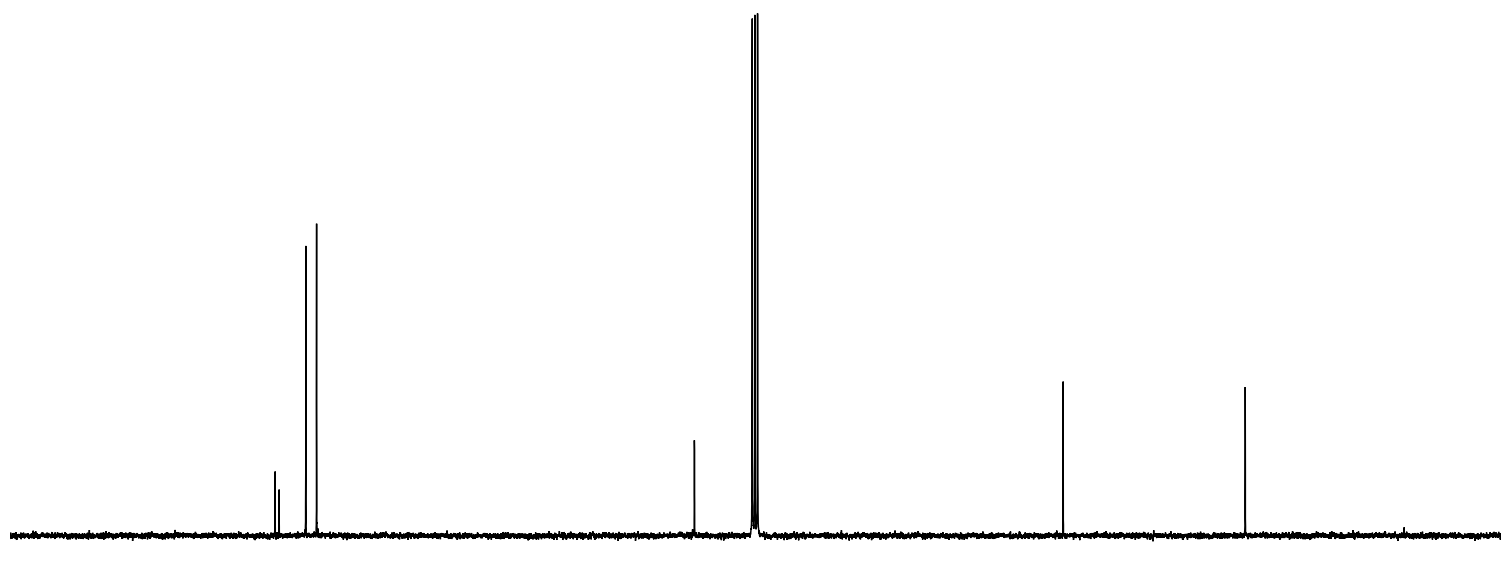

==== CHANNEL f1 =====  
NUC1 13C  
P1 8.50 usec  
PL1 1.00 dB  
PL1W 75.02186584 W  
SFO1 100.6228298 MHz

==== CHANNEL f2 =====  
CPDPRG2 waltz16  
NUC2 1H  
PCPD2 90.00 usec  
PL2 -2.00 dB  
PL12 18.23 dB  
PL13 19.00 dB  
PL2W 31.17179108 W  
PL12W 0.29563907 W  
PL13W 0.24760634 W  
SFO2 400.1316005 MHz  
SI 32768  
SF 100.6127662 MHz  
WDW EM  
SSB 0  
LB 1.00 Hz  
GB 0  
PC 1.40

160 150 140 130 120 110 100 90 80 70 60 50 40 30 20 10 0 ppm

KL12 (R)  
 PROTON CDC13 {E:\NMR Data} skl 12



7.2464  
 7.1214  
 7.1015  
 7.0495  
 7.0295

4.7683  
 4.7512  
 4.7341  
 4.7172

3.2982  
 3.2797  
 3.2633  
 3.2448  
 2.9870  
 2.9699  
 2.9521  
 2.9350

2.3142

1.5333  
 1.5168

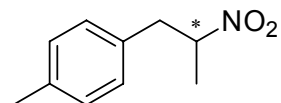

NAME Jul28-2012  
 EXPNO 1  
 PROCNO 1  
 Date\_ 20120729  
 Time\_ 3.48  
 INSTRUM spect  
 PROBHD 5 mm PABBO BB-  
 PULPROG zg30  
 TD 65536  
 SOLVENT CDC13  
 NS 44  
 DS 2  
 SWH 8223.685 Hz  
 FIDRES 0.125483 Hz  
 AQ 3.9846387 sec  
 RG 161  
 DW 60.800 usec  
 DE 6.50 usec  
 TE 301.3 K  
 D1 1.00000000 sec  
 TD0 1

===== CHANNEL f1 =====  
 NUC1 1H  
 P1 8.76 usec  
 PL1 -2.00 dB  
 PL1W 31.17179108 W  
 SFO1 400.1324710 MHz  
 SI 32768  
 SF 400.1300157 MHz  
 WDW EM  
 SSB 0  
 LB 0.30 Hz  
 GB 0  
 PC 1.00

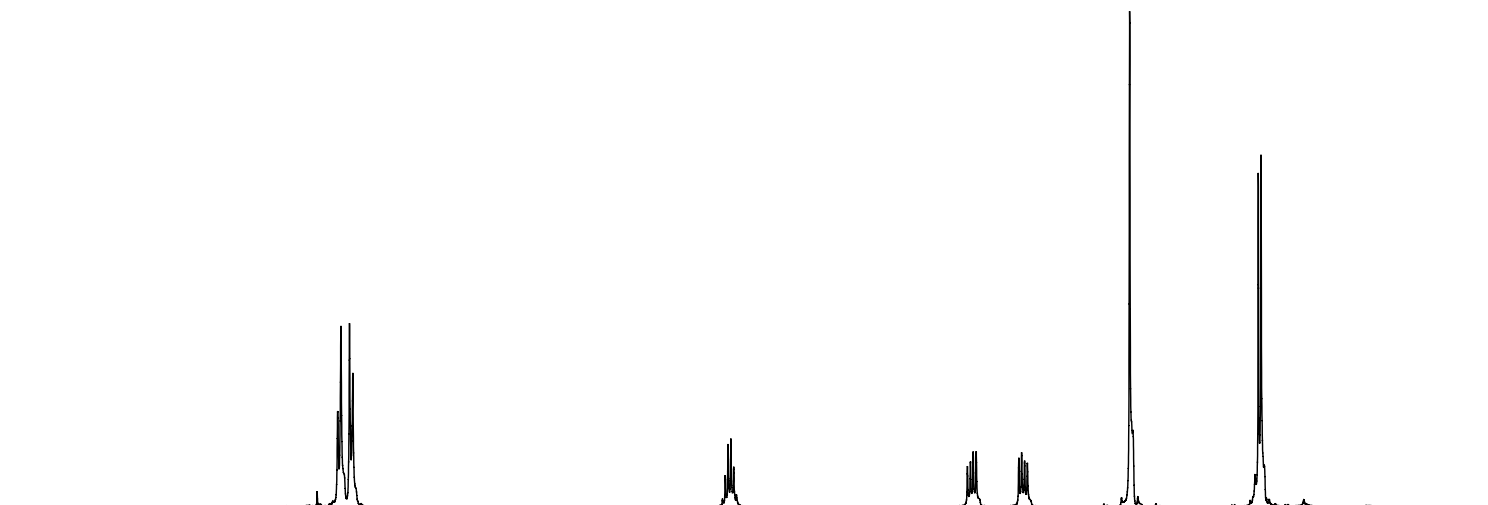

8.5 8.0 7.5 7.0 6.5 6.0 5.5 5.0 4.5 4.0 3.5 3.0 2.5 2.0 1.5 1.0 ppm

2.11  
 2.04

1.04

1.05

1.00

3.06

3.05

KL12 (R)  
C13CPD CDC13 {E:\NMR Data} skl 12



137.07  
132.46  
129.51  
128.86

84.55  
77.36  
77.04  
76.73

40.84

21.03  
18.74

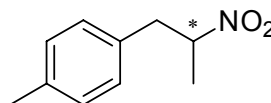

NAME Jul28-2012  
EXPNO 3  
PROCNO 1  
Date\_ 20120729  
Time\_ 6.19  
INSTRUM spect  
PROBHD 5 mm PABBO BB-  
PULPROG zgpg30  
TD 65536  
SOLVENT CDC13  
NS 2048  
DS 4  
SWH 24038.461 Hz  
FIDRES 0.366798 Hz  
AQ 1.3631988 sec  
RG 2050  
DW 20.800 usec  
DE 6.50 usec  
TE 302.9 K  
D1 2.00000000 sec  
D11 0.03000000 sec  
TD0 1

==== CHANNEL f1 =====  
NUC1 13C  
P1 8.50 usec  
PL1 1.00 dB  
PL1W 75.02186584 W  
SFO1 100.6228298 MHz

==== CHANNEL f2 =====  
CPDPRG2 waltz16  
NUC2 1H  
PCPD2 90.00 usec  
PL2 -2.00 dB  
PL12 18.23 dB  
PL13 19.00 dB  
PL2W 31.17179108 W  
PL12W 0.29563907 W  
PL13W 0.24760634 W  
SFO2 400.1316005 MHz  
SI 32768  
SF 100.6127678 MHz  
WDW EM  
SSB 0  
LB 1.00 Hz  
GB 0  
PC 1.40

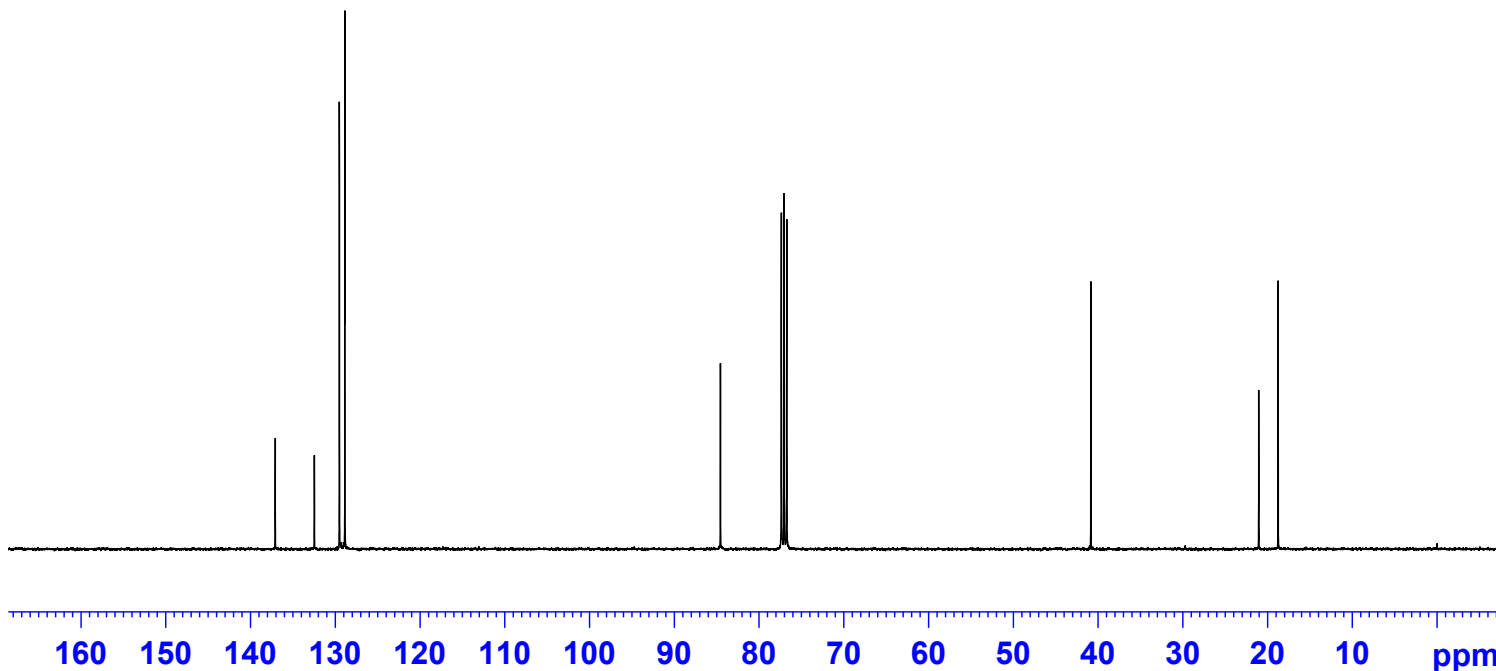

KL13(R)  
 PROTON CDC13 {E:\NMR Data} skl 13



7.4494  
 7.4450  
 7.4325  
 7.4286  
 7.4225  
 7.2589  
 7.0488  
 7.0281

4.7701  
 4.7534  
 4.7346  
 4.7180

3.2944  
 3.2749  
 3.2590  
 3.2396  
 2.9995  
 2.9835  
 2.9642  
 2.9482

1.5576  
 1.5410

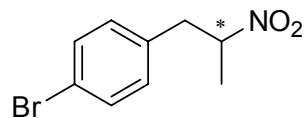

NAME Jul28-2012  
 EXPNO 4  
 PROCNO 1  
 Date\_ 20120729  
 Time\_ 6.28  
 INSTRUM spect  
 PROBHD 5 mm PABBO BB-  
 PULPROG zg30  
 TD 65536  
 SOLVENT CDC13  
 NS 44  
 DS 2  
 SWH 8223.685 Hz  
 FIDRES 0.125483 Hz  
 AQ 3.9846387 sec  
 RG 322  
 DW 60.800 usec  
 DE 6.50 usec  
 TE 301.3 K  
 D1 1.00000000 sec  
 TD0 1

===== CHANNEL f1 =====  
 NUC1 1H  
 P1 8.76 usec  
 PL1 -2.00 dB  
 PL1W 31.17179108 W  
 SFO1 400.1324710 MHz  
 SI 32768  
 SF 400.1300103 MHz  
 WDW EM  
 SSB 0  
 LB 0.30 Hz  
 GB 0  
 PC 1.00

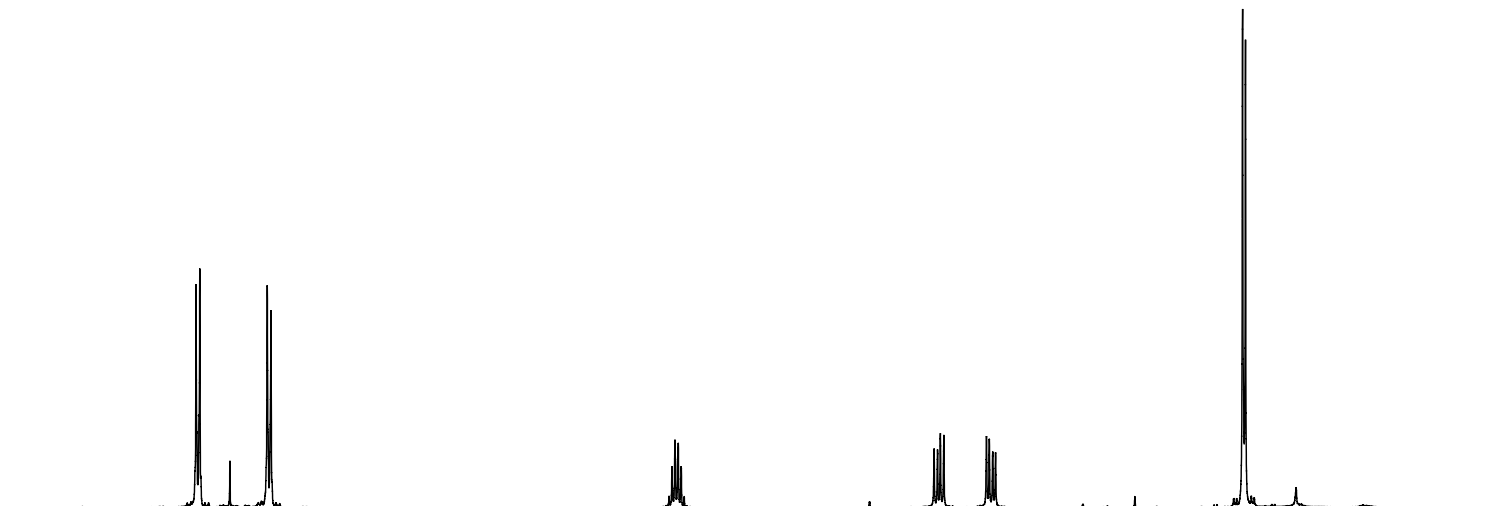

8.0 7.5 7.0 6.5 6.0 5.5 5.0 4.5 4.0 3.5 3.0 2.5 2.0 1.5 1.0 ppm

1.99

1.99

1.00

1.00

1.01

3.34

KL13(R)  
C13CPD CDC13 {E:\NMR Data} skl 13



NAME Jul28-2012  
EXPNO 6  
PROCNO 1  
Date\_ 20120729  
Time\_ 8.59  
INSTRUM spect  
PROBHD 5 mm PABBO BB-  
PULPROG zgpg30  
TD 65536  
SOLVENT CDC13  
NS 2048  
DS 4  
SWH 24038.461 Hz  
FIDRES 0.366798 Hz  
AQ 1.3631988 sec  
RG 2050  
DW 20.800 usec  
DE 6.50 usec  
TE 302.5 K  
D1 2.00000000 sec  
D11 0.03000000 sec  
TD0 1

==== CHANNEL f1 =====  
NUC1 13C  
P1 8.50 usec  
PL1 1.00 dB  
PL1W 75.02186584 W  
SFO1 100.6228298 MHz

==== CHANNEL f2 =====  
CPDPRG2 waltz16  
NUC2 1H  
PCPD2 90.00 usec  
PL2 -2.00 dB  
PL12 18.23 dB  
PL13 19.00 dB  
PL2W 31.17179108 W  
PL12W 0.29563907 W  
PL13W 0.24760634 W  
SFO2 400.1316005 MHz  
SI 32768  
SF 100.6127671 MHz  
WDW EM  
SSB 0  
LB 1.00 Hz  
GB 0  
PC 1.40

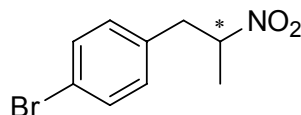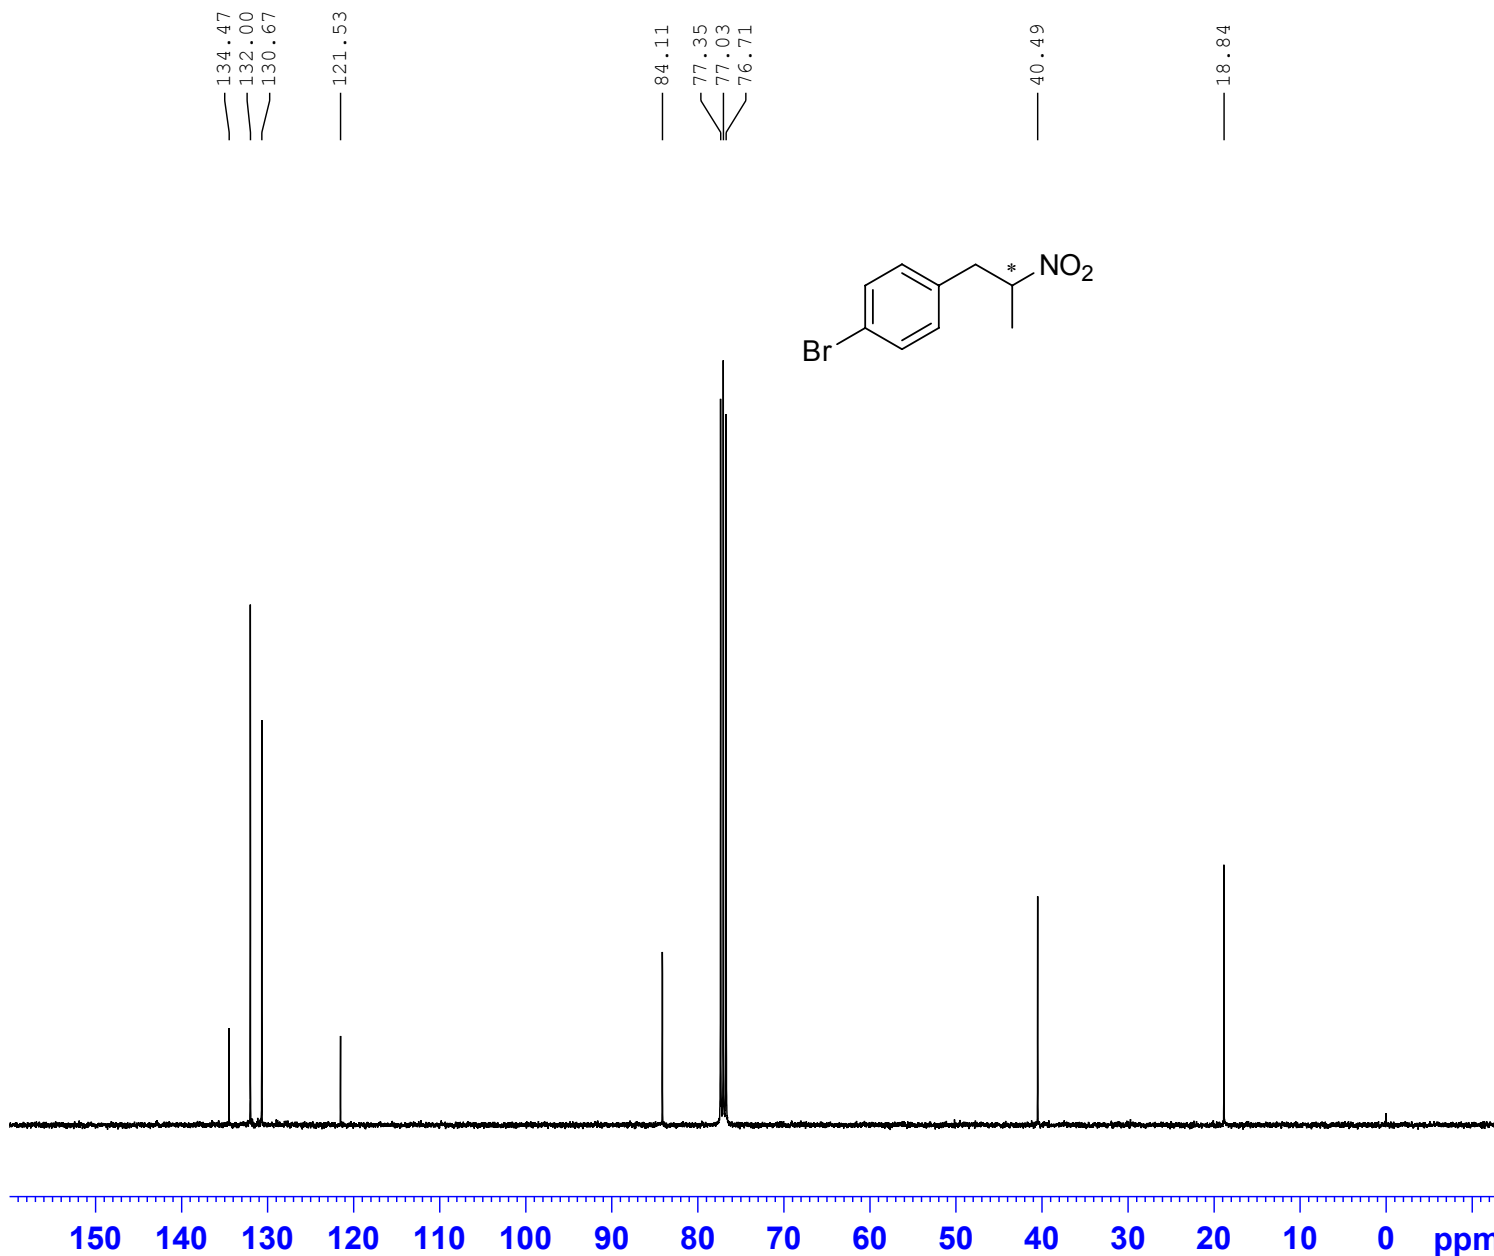

KL17(R)  
 PROTON CDC13 {E:\NMR Data} skl 45



8.1911  
 8.1693

7.3699  
 7.3483  
 7.2720

4.8812  
 4.8646  
 4.8605  
 4.8496  
 4.8481  
 4.8438  
 4.8331  
 4.8289  
 4.8164  
 4.8123  
 4.7958

3.4488  
 3.4279  
 3.4131  
 3.3922  
 3.1792  
 3.1648  
 3.1436  
 3.1291

1.6244  
 1.6077

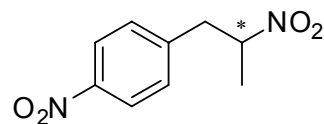

NAME Jul29-2012  
 EXPNO 13  
 PROCNO 1  
 Date\_ 20120730  
 Time\_ 4.13  
 INSTRUM spect  
 PROBHD 5 mm PABBO BB-  
 PULPROG zg30  
 TD 65536  
 SOLVENT CDC13  
 NS 32  
 DS 2  
 SWH 8223.685 Hz  
 FIDRES 0.125483 Hz  
 AQ 3.9846387 sec  
 RG 181  
 DW 60.800 usec  
 DE 6.50 usec  
 TE 300.5 K  
 D1 1.00000000 sec  
 TD0 1

===== CHANNEL f1 =====  
 NUC1 1H  
 P1 8.76 usec  
 PL1 -2.00 dB  
 PL1W 31.17179108 W  
 SFO1 400.1324710 MHz  
 SI 32768  
 SF 400.1300050 MHz  
 WDW EM  
 SSB 0  
 LB 0.30 Hz  
 GB 0  
 PC 1.00

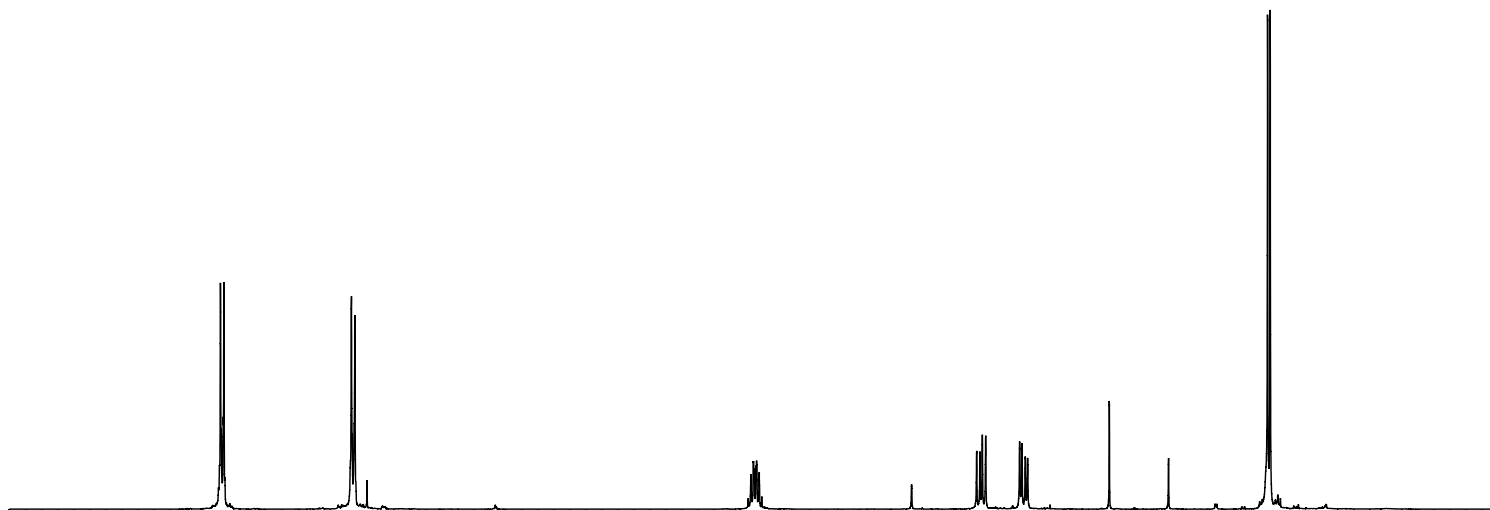

9.0 8.5 8.0 7.5 7.0 6.5 6.0 5.5 5.0 4.5 4.0 3.5 3.0 2.5 2.0 1.5 1.0 ppm

2.06

2.07

1.01

1.00

1.00

3.05

KL17(R)  
C13CPD32 CDC13 {E:\NMR Data} skl 45



NAME Jul29-2012  
EXPNO 16  
PROCNO 1  
Date\_ 20120730  
Time\_ 15.53  
INSTRUM spect  
PROBHD 5 mm PABBO BB-  
PULPROG zgpg30  
TD 65536  
SOLVENT CDC13  
NS 1024  
DS 2  
SWH 24038.461 Hz  
FIDRES 0.366798 Hz  
AQ 1.3631988 sec  
RG 2050  
DW 20.800 usec  
DE 6.50 usec  
TE 302.5 K  
D1 2.00000000 sec  
D11 0.03000000 sec  
TD0 1

===== CHANNEL f1 =====  
NUC1 13C  
P1 8.50 usec  
PL1 1.00 dB  
PL1W 75.02186584 W  
SFO1 100.6228298 MHz

===== CHANNEL f2 =====  
CPDPRG2 waltz16  
NUC2 1H  
PCPD2 90.00 usec  
PL2 -2.00 dB  
PL12 18.23 dB  
PL13 19.00 dB  
PL2W 31.17179108 W  
PL12W 0.29563907 W  
PL13W 0.24760634 W  
SFO2 400.1316005 MHz  
SI 32768  
SF 100.6127690 MHz  
WDW EM  
SSB 0  
LB 1.00 Hz  
GB 0  
PC 1.40

147.44  
142.94  
129.92  
124.03

83.71  
77.36  
77.05  
76.73

40.57

19.08

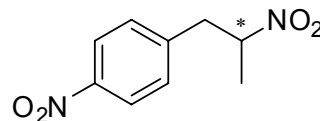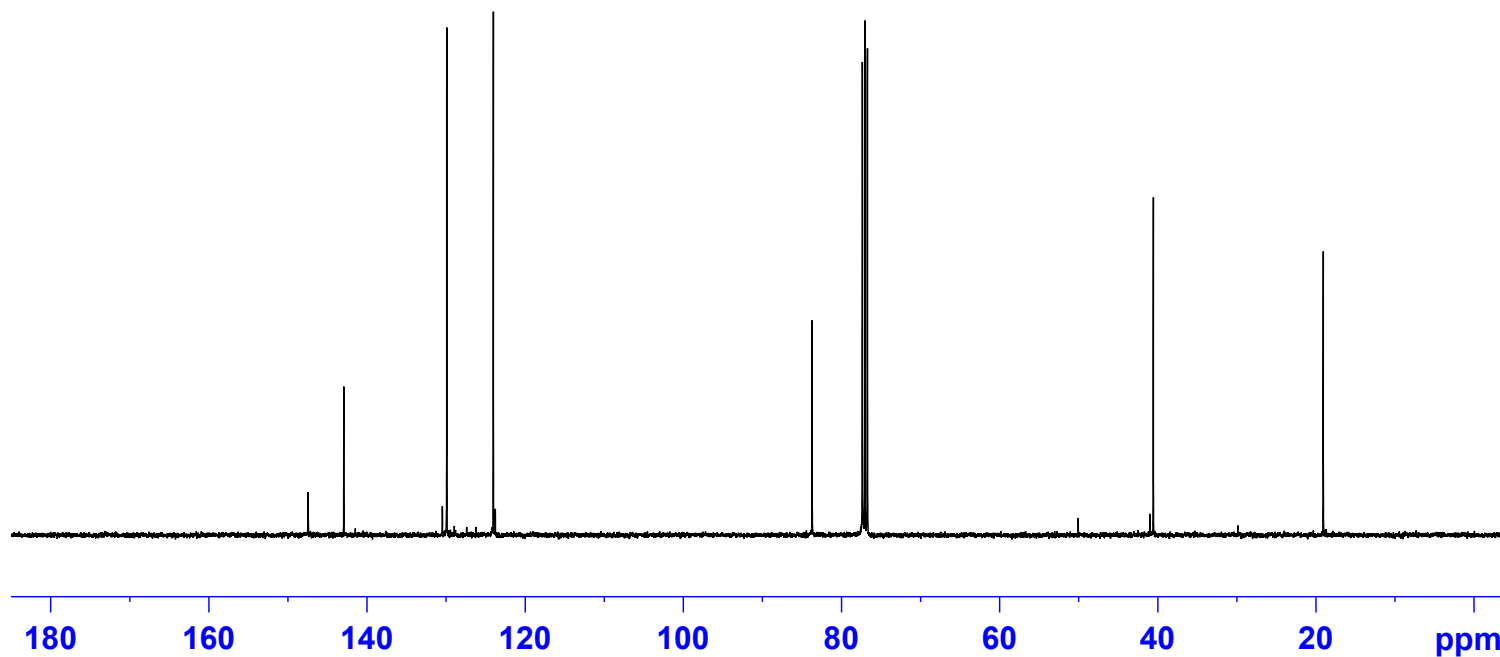



KL10 (R)  
 PROTON CDCl3 {E:\NMR Data} skl 11



```

NAME          Jul27-2012
EXPNO         5
PROCNO        1
Date_         20120727
Time_         14.06
INSTRUM       spect
PROBHD        5 mm PABBO BB-
PULPROG       zg30
TD            65536
SOLVENT       CDCl3
NS            32
DS            2
SWH           8223.685 Hz
FIDRES        0.125483 Hz
AQ            3.9846387 sec
RG            406
DW            60.800 usec
DE            6.50 usec
TE            301.5 K
D1            1.00000000 sec
TD0           1
  
```

7.3933  
 7.3878  
 7.3742  
 7.3704  
 7.2580  
 7.2501  
 7.2443  
 7.2322  
 7.2263  
 7.2228  
 7.2160  
 7.2077  
 7.2046  
 7.2000  
 7.1866  
 7.1813  
 7.1757  
 7.1639  
 7.1570

4.9517  
 4.9354  
 4.9316  
 4.9192  
 4.9153  
 4.8991

3.4274  
 3.4070  
 3.3923  
 3.3719  
 3.2181  
 3.2029  
 3.1830  
 3.1678

1.5999  
 1.5833

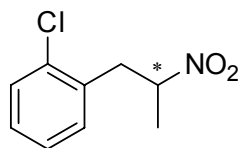

```

===== CHANNEL f1 =====
NUC1          1H
P1            8.76 usec
PL1           -2.00 dB
PL1W          31.17179108 W
SFO1          400.1324710 MHz
SI            32768
SF            400.1300104 MHz
WDW           EM
SSB           0
LB            0.30 Hz
GB            0
PC            1.00
  
```

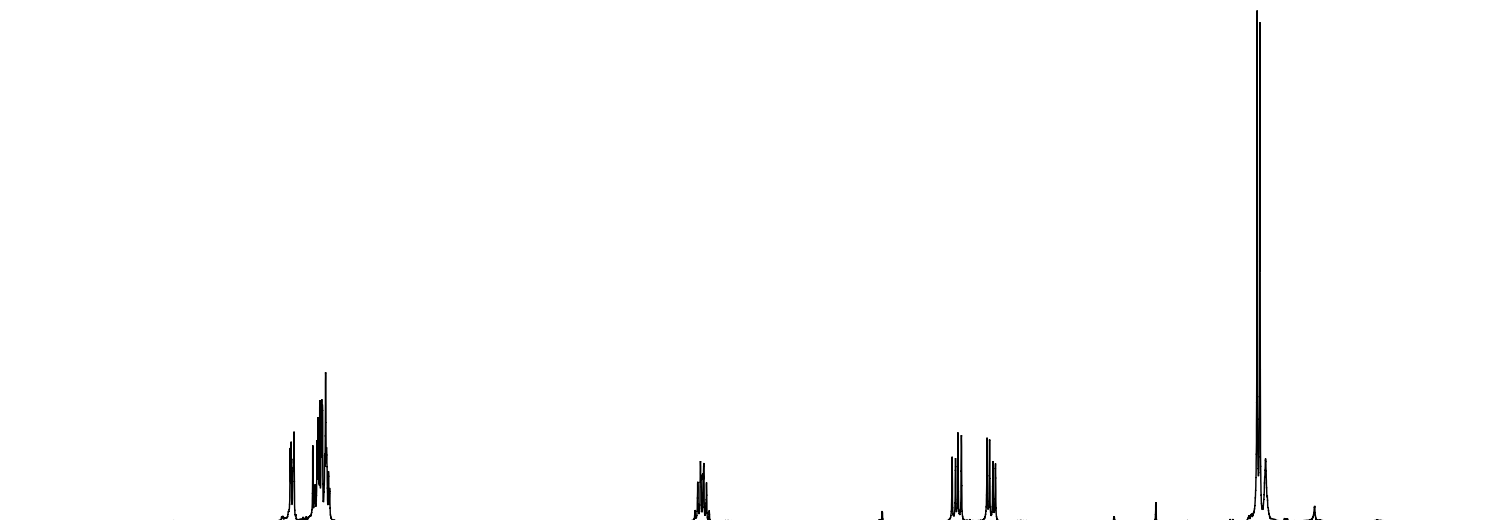

8.5 8.0 7.5 7.0 6.5 6.0 5.5 5.0 4.5 4.0 3.5 3.0 2.5 2.0 1.5 1.0 ppm

1.06  
 3.05

0.98

1.00  
 1.01

3.04

KL10 (R)  
C13CPD32 CDC13 {E:\NMR Data} skl 10

134.1445  
133.4517  
131.3816  
129.8337  
129.0410  
127.2103

82.6772  
77.3167  
76.9996  
76.6819

38.8440

19.1182

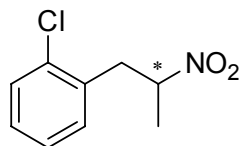

NAME Jul27-2012  
EXPNO 16  
PROCNO 1  
Date\_ 20120728  
Time\_ 14.19  
INSTRUM spect  
PROBHD 5 mm PABBO BB-  
PULPROG zgpg30  
TD 65536  
SOLVENT CDC13  
NS 1024  
DS 2  
SWH 24038.461 Hz  
FIDRES 0.366798 Hz  
AQ 1.3631988 sec  
RG 2050  
DW 20.800 usec  
DE 6.50 usec  
TE 303.9 K  
D1 2.00000000 sec  
D11 0.03000000 sec  
TD0 1

===== CHANNEL f1 =====  
NUC1 13C  
P1 8.50 usec  
PL1 1.00 dB  
PL1W 75.02186584 W  
SFO1 100.6228298 MHz

===== CHANNEL f2 =====  
CPDPRG2 waltz16  
NUC2 1H  
PCPD2 90.00 usec  
PL2 -2.00 dB  
PL12 18.23 dB  
PL13 19.00 dB  
PL2W 31.17179108 W  
PL12W 0.29563907 W  
PL13W 0.24760634 W  
SFO2 400.1316005 MHz  
SI 32768  
SF 100.6127690 MHz  
WDW EM  
SSB 0  
LB 1.00 Hz  
GB 0  
PC 1.40

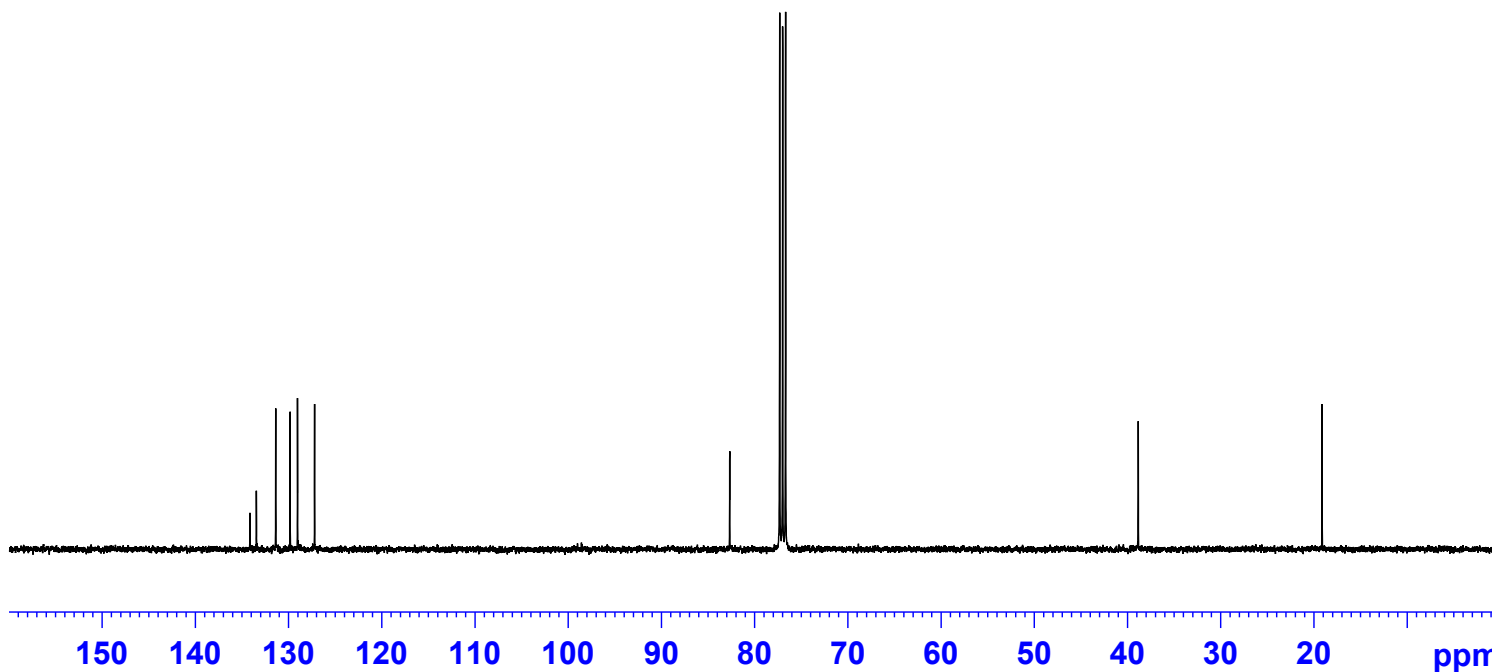

KL21(R)  
 PROTON CDC13 {E:\NMR Data} skl 21



7.8152  
 7.8005  
 7.7906  
 7.7806  
 7.7660  
 7.6130  
 7.4894  
 7.4771  
 7.4715  
 7.4623  
 7.4528  
 7.4477  
 7.4352  
 7.2787  
 7.2744  
 7.2576  
 7.2533  
 7.2363

4.8911  
 4.8739  
 4.8566  
 4.8394

3.5085  
 3.4900  
 3.4735  
 3.4551  
 3.1771  
 3.1599  
 3.1421  
 3.1250

1.5730  
 1.5563

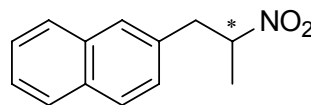

NAME Jul30-2012  
 EXPNO 4  
 PROCNO 1  
 Date\_ 20120730  
 Time\_ 16.00  
 INSTRUM spect  
 PROBHD 5 mm PABBO BB-  
 PULPROG zg30  
 TD 65536  
 SOLVENT CDC13  
 NS 32  
 DS 2  
 SWH 8223.685 Hz  
 FIDRES 0.125483 Hz  
 AQ 3.9846387 sec  
 RG 181  
 DW 60.800 usec  
 DE 6.50 usec  
 TE 301.1 K  
 D1 1.00000000 sec  
 TD0 1

===== CHANNEL f1 =====  
 NUC1 1H  
 P1 8.76 usec  
 PL1 -2.00 dB  
 PL1W 31.17179108 W  
 SFO1 400.1324710 MHz  
 SI 32768  
 SF 400.1300193 MHz  
 WDW EM  
 SSB 0  
 LB 0.30 Hz  
 GB 0  
 PC 1.00

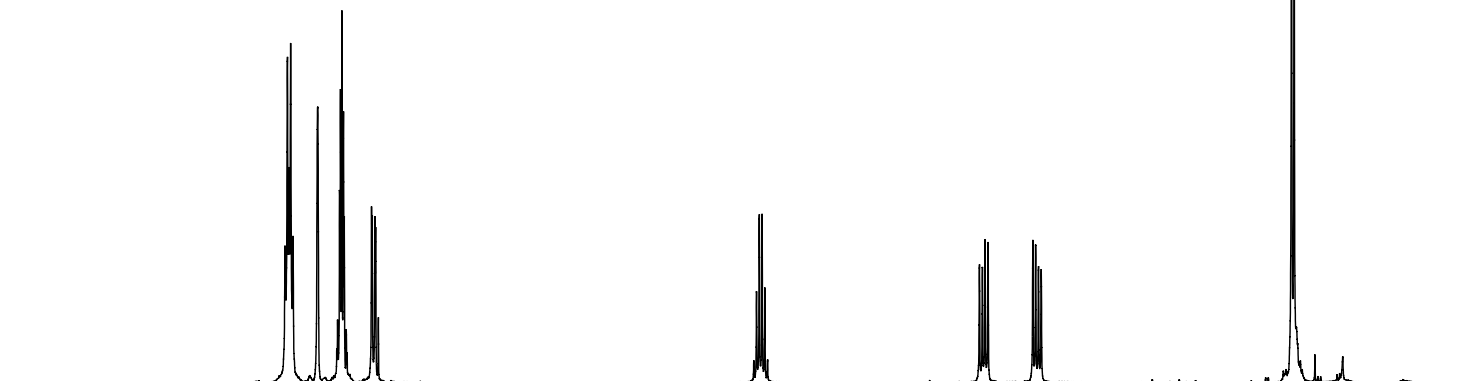

9.0 8.5 8.0 7.5 7.0 6.5 6.0 5.5 5.0 4.5 4.0 3.5 3.0 2.5 2.0 1.5 1.0 ppm

3.01  
 0.96  
 1.97  
 1.06  
 0.99  
 1.00  
 1.00  
 3.11

KL21(R)  
 C13CPD CDC13 {E:\NMR Data} skl 21



133.48  
 132.98  
 132.62  
 128.63  
 127.93  
 127.69  
 127.67  
 126.78  
 126.38  
 126.02

84.33  
 77.36  
 77.04  
 76.72

41.34

18.86

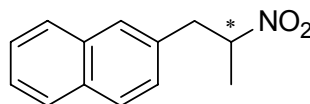

NAME Jul30-2012  
 EXPNO 12  
 PROCNO 1  
 Date\_ 20120731  
 Time\_ 0.30  
 INSTRUM spect  
 PROBHD 5 mm PABBO BB-  
 PULPROG zgpg30  
 TD 65536  
 SOLVENT CDC13  
 NS 1024  
 DS 4  
 SWH 24038.461 Hz  
 FIDRES 0.366798 Hz  
 AQ 1.3631988 sec  
 RG 2050  
 DW 20.800 usec  
 DE 6.50 usec  
 TE 302.9 K  
 D1 2.00000000 sec  
 D11 0.03000000 sec  
 TD0 1

===== CHANNEL f1 =====  
 NUC1 13C  
 P1 8.50 usec  
 PL1 1.00 dB  
 PL1W 75.02186584 W  
 SFO1 100.6228298 MHz

===== CHANNEL f2 =====  
 CPDPRG2 waltz16  
 NUC2 1H  
 PCPD2 90.00 usec  
 PL2 -2.00 dB  
 PL12 18.23 dB  
 PL13 19.00 dB  
 PL2W 31.17179108 W  
 PL12W 0.29563907 W  
 PL13W 0.24760634 W  
 SFO2 400.1316005 MHz  
 SI 32768  
 SF 100.6127690 MHz  
 WDW EM  
 SSB 0  
 LB 1.00 Hz  
 GB 0  
 PC 1.40

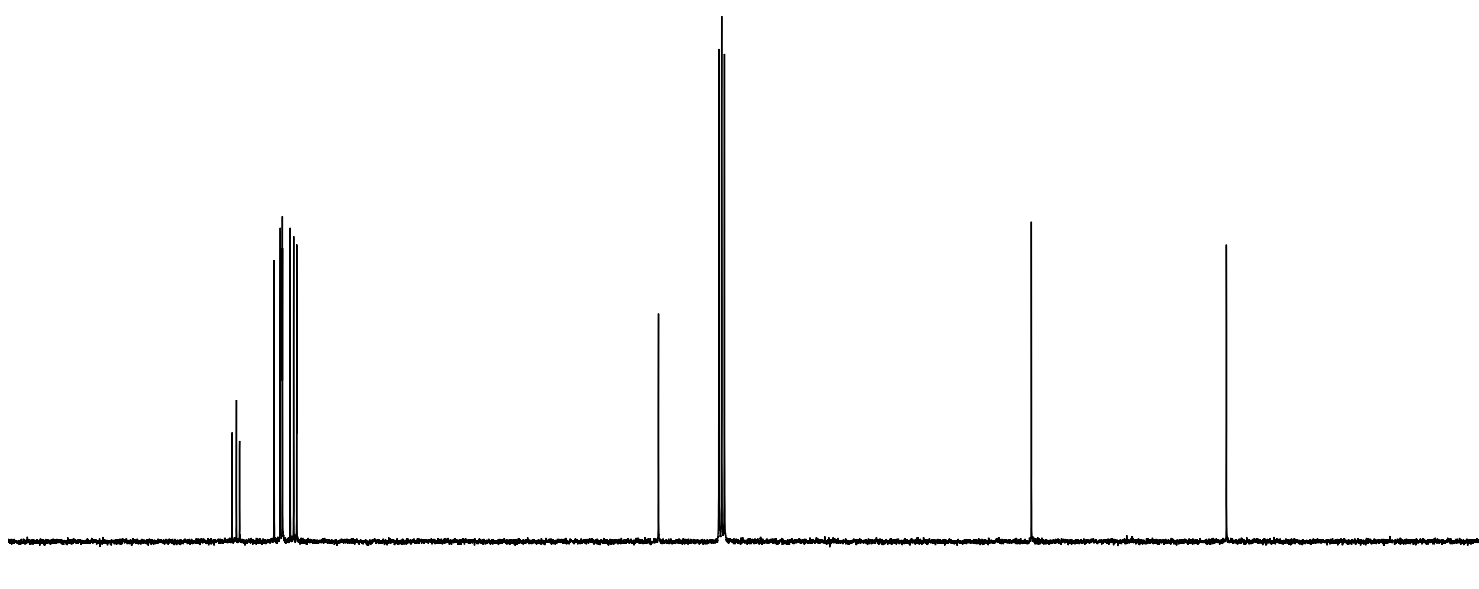

150 140 130 120 110 100 90 80 70 60 50 40 30 20 10 0 ppm

KL26(R)  
 PROTON CDC13 {E:\NMR Data} skl 28

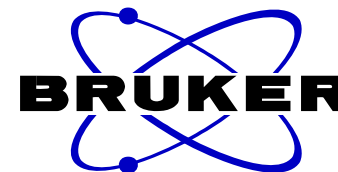

7.2947  
 7.2908  
 7.2770  
 7.2614  
 7.2581  
 7.2411  
 7.2051  
 7.2020  
 7.1867  
 7.1814  
 7.1683  
 7.1651  
 7.1548  
 7.1515  
 7.1342

4.5798  
 4.5761  
 4.5722  
 4.5636  
 4.5594  
 4.5556  
 4.5470  
 4.5425  
 4.5391  
 4.5302  
 4.5258  
 2.6551  
 2.6367  
 2.6182  
 2.0667  
 2.0469  
 2.0323  
 2.0286  
 2.0165  
 2.0113  
 2.0086  
 1.9961  
 1.9900  
 1.9798  
 1.9750  
 1.7738  
 1.7604  
 1.7538  
 1.7405  
 1.7338  
 1.7266  
 1.7207  
 1.7165  
 1.7145  
 1.7010  
 1.6915  
 1.6874  
 1.6761  
 1.6737  
 1.6570

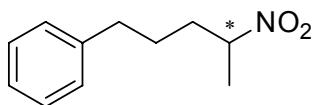

NAME Aug08-2012  
 EXPNO 5  
 PROCNO 1  
 Date\_ 20120808  
 Time\_ 19.43  
 INSTRUM spect  
 PROBHD 5 mm PABBO BB-  
 PULPROG zg30  
 TD 65536  
 SOLVENT CDC13  
 NS 64  
 DS 2  
 SWH 8223.685 Hz  
 FIDRES 0.125483 Hz  
 AQ 3.9846387 sec  
 RG 144  
 DW 60.800 usec  
 DE 6.50 usec  
 TE 304.8 K  
 D1 1.00000000 sec  
 TD0 1

===== CHANNEL f1 =====  
 NUC1 1H  
 P1 8.76 usec  
 PL1 -2.00 dB  
 PL1W 31.17179108 W  
 SFO1 400.1324710 MHz  
 SI 32768  
 SF 400.1300173 MHz  
 WDW EM  
 SSB 0  
 LB 0.30 Hz  
 GB 0  
 PC 1.00

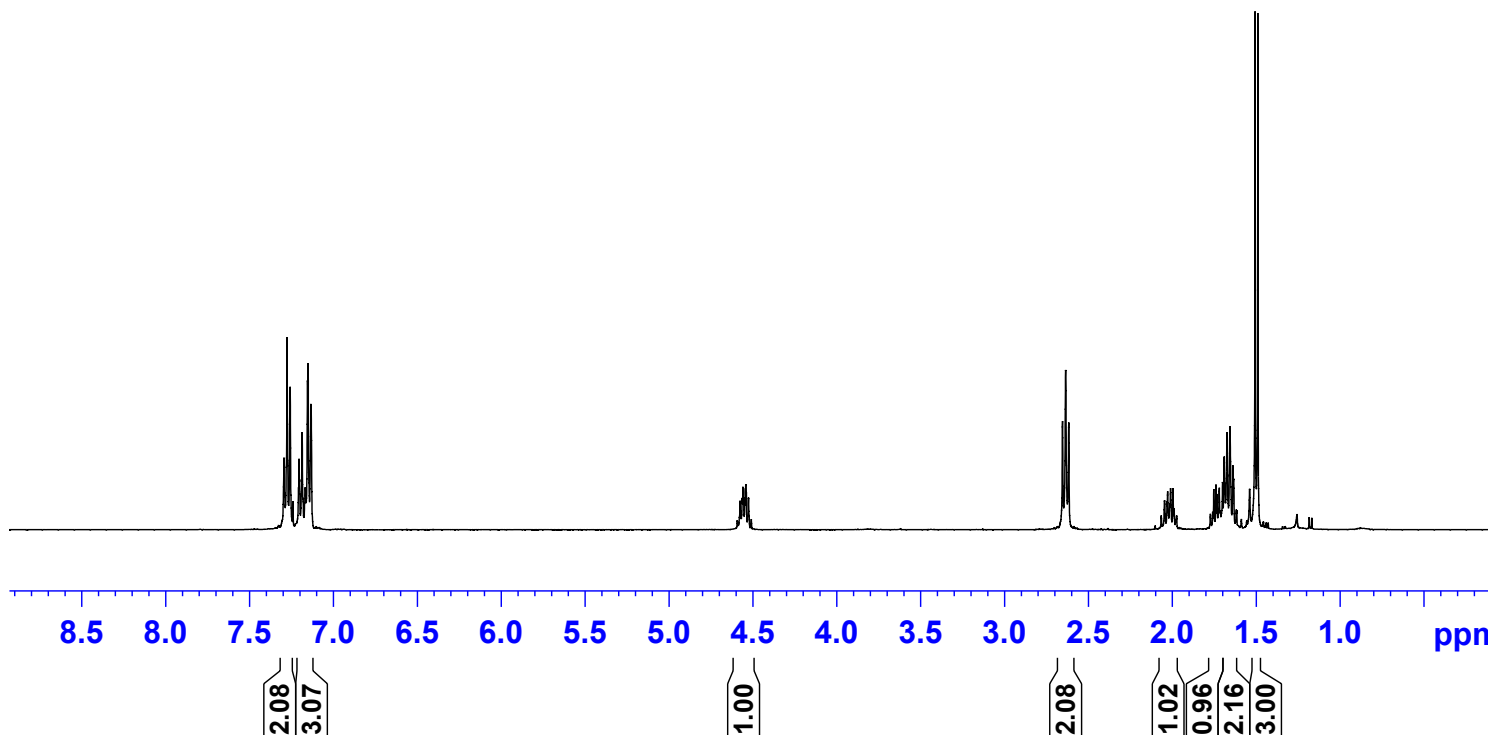

KL26(R)  
C13CPD CDC13 {E:\NMR Data} skl 28



NAME Aug08-2012  
EXPNO 7  
PROCNO 1  
Date\_ 20120808  
Time\_ 22.13  
INSTRUM spect  
PROBHD 5 mm PABBO BB-  
PULPROG zgpg30  
TD 65536  
SOLVENT CDC13  
NS 2048  
DS 4  
SWH 24038.461 Hz  
FIDRES 0.366798 Hz  
AQ 1.3631988 sec  
RG 2050  
DW 20.800 usec  
DE 6.50 usec  
TE 306.7 K  
D1 2.00000000 sec  
D11 0.03000000 sec  
TD0 1

==== CHANNEL f1 =====  
NUC1 13C  
P1 8.50 usec  
PL1 1.00 dB  
PL1W 75.02186584 W  
SFO1 100.6228298 MHz

==== CHANNEL f2 =====  
CPDPRG2 waltz16  
NUC2 1H  
PCPD2 90.00 usec  
PL2 -2.00 dB  
PL12 18.23 dB  
PL13 19.00 dB  
PL2W 31.17179108 W  
PL12W 0.29563907 W  
PL13W 0.24760634 W  
SFO2 400.1316005 MHz  
SI 32768  
SF 100.6127690 MHz  
WDW EM  
SSB 0  
LB 1.00 Hz  
GB 0  
PC 1.40

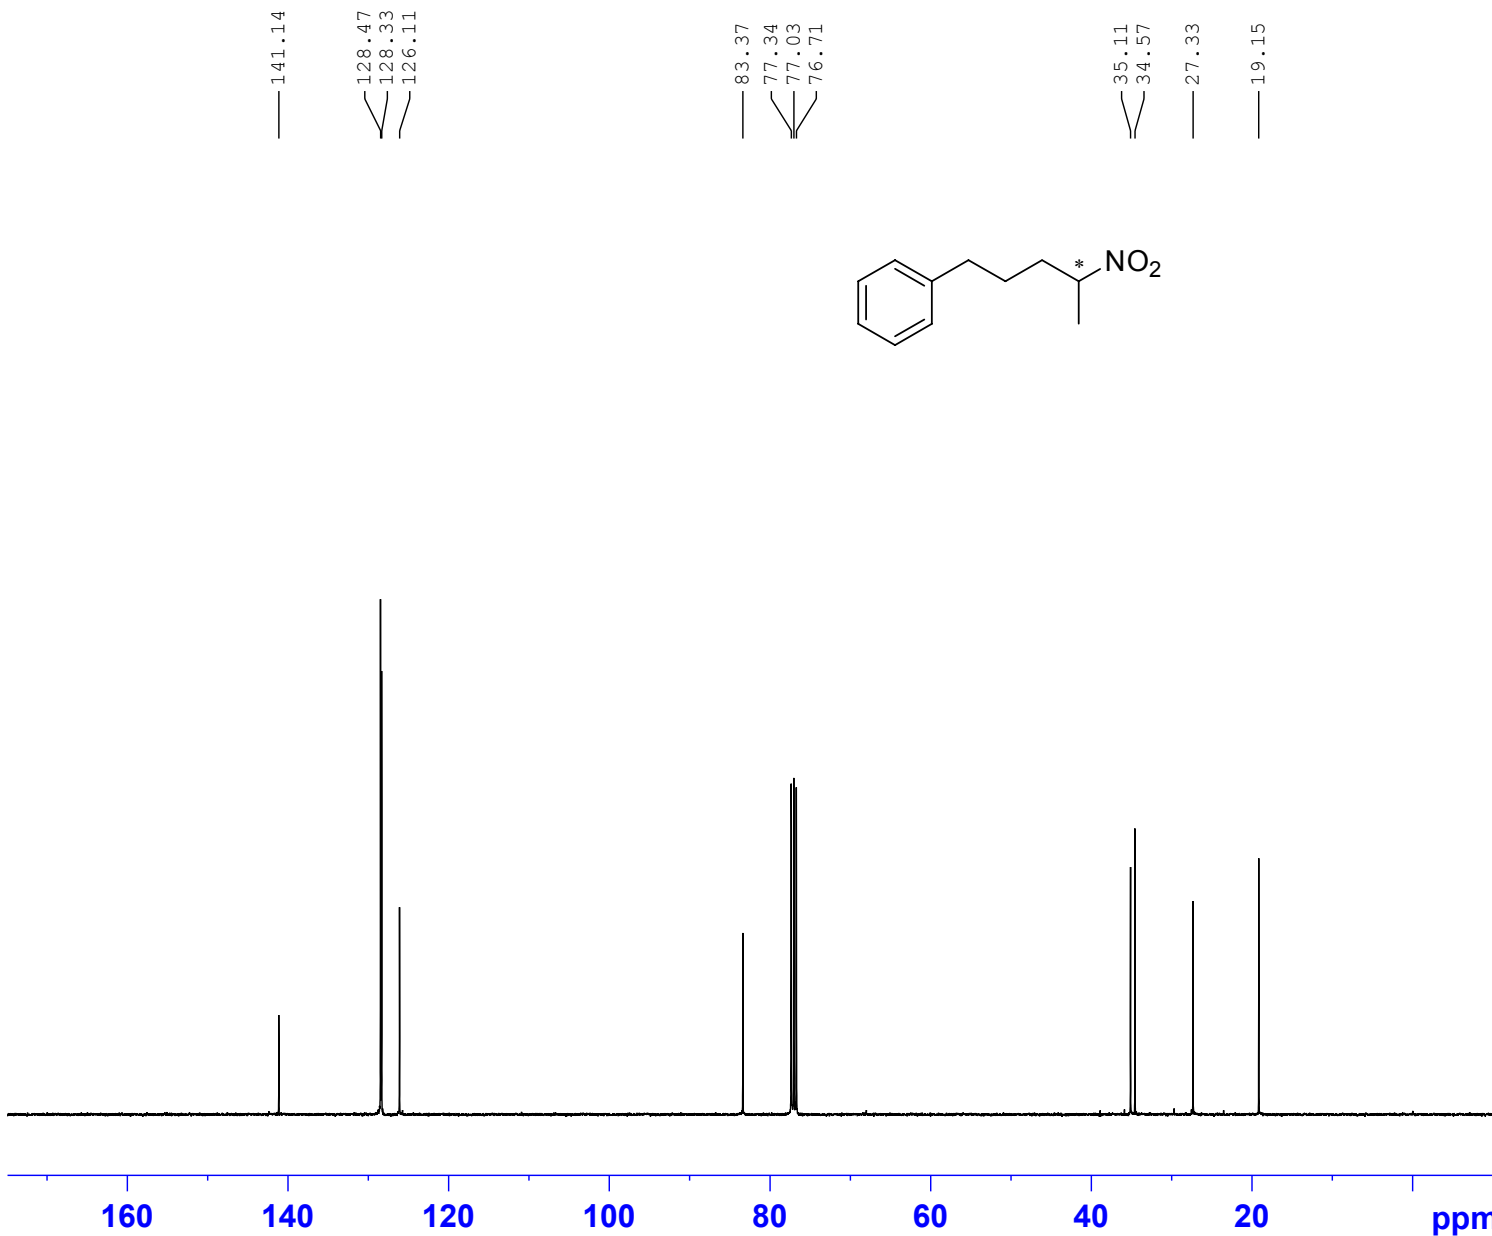

KL29(R)  
 PROTON CDC13 {E:\NMR Data} skl 44



7.2488  
 7.2446  
 7.2403  
 7.2324  
 7.2275  
 7.2235  
 7.2126  
 7.2093  
 7.2038  
 7.1955  
 7.1917  
 7.1881  
 7.1803  
 7.1745  
 7.1659  
 7.1591  
 7.1556  
 7.1524  
 7.0904  
 7.0865  
 7.0815  
 7.0699  
 4.5857  
 4.5746  
 4.5711  
 4.5626  
 4.5609  
 4.5505  
 4.5403  
 4.5385  
 4.5300  
 4.5264  
 4.5154  
 3.2135  
 3.1922  
 3.1781  
 3.1568  
 2.9759  
 2.9612  
 2.9404  
 2.9257  
 1.9817  
 1.9767  
 1.9635  
 1.9584  
 1.9455  
 1.9402  
 1.9272  
 1.9221  
 1.9088  
 1.9039  
 1.8856  
 1.8151  
 1.8040  
 1.7964  
 1.7853  
 1.7778  
 1.7668  
 1.7600  
 1.7489  
 1.7416  
 1.7306  
 1.7230  
 0.9236  
 0.9051  
 0.8866

NAME Aug11-2012  
 EXPNO 3  
 PROCNO 1  
 Date\_ 20120812  
 Time\_ 1.51  
 INSTRUM spect  
 PROBHD 5 mm PABBO BB-  
 PULPROG zg30  
 TD 65536  
 SOLVENT CDC13  
 NS 32  
 DS 2  
 SWH 8223.685 Hz  
 FIDRES 0.125483 Hz  
 AQ 3.9846387 sec  
 RG 181  
 DW 60.800 usec  
 DE 6.50 usec  
 TE 304.3 K  
 D1 1.00000000 sec  
 TD0 1

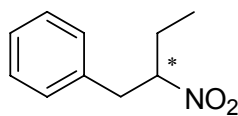

===== CHANNEL f1 =====  
 NUC1 1H  
 P1 8.76 usec  
 PL1 -2.00 dB  
 PL1W 31.17179108 W  
 SFO1 400.1324710 MHz  
 SI 32768  
 SF 400.1300434 MHz  
 WDW EM  
 SSB 0  
 LB 0.30 Hz  
 GB 0  
 PC 1.00

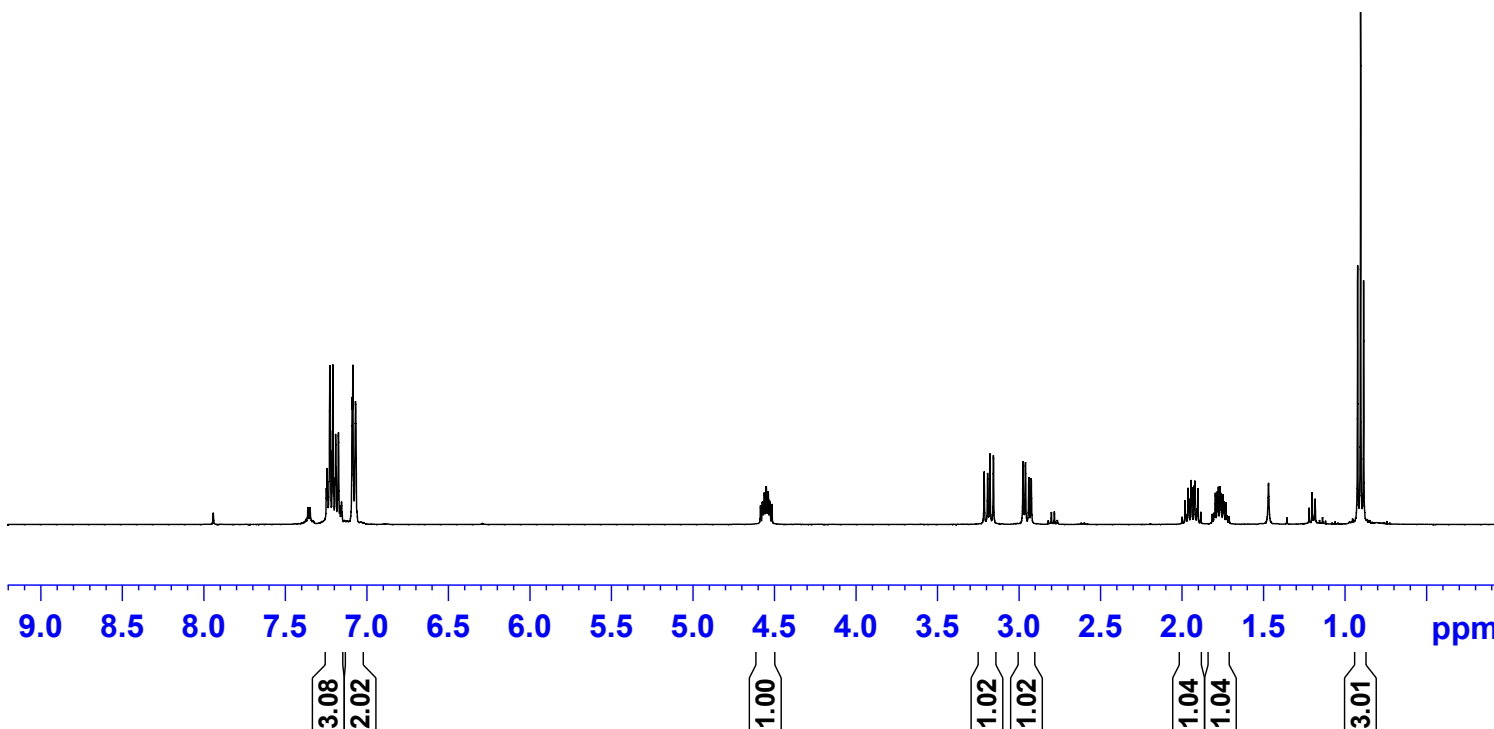

KL29(R)  
C13CPD32 CDC13 {E:\NMR Data} skl 44



NAME Aug11-2012  
EXPNO 5  
PROCNO 1  
Date\_ 20120812  
Time\_ 3.22  
INSTRUM spect  
PROBHD 5 mm PABBO BB-  
PULPROG zgpg30  
TD 65536  
SOLVENT CDC13  
NS 1024  
DS 2  
SWH 24038.461 Hz  
FIDRES 0.366798 Hz  
AQ 1.3631988 sec  
RG 2050  
DW 20.800 usec  
DE 6.50 usec  
TE 305.6 K  
D1 2.00000000 sec  
D11 0.03000000 sec  
TD0 1

==== CHANNEL f1 =====  
NUC1 13C  
P1 8.50 usec  
PL1 1.00 dB  
PL1W 75.02186584 W  
SFO1 100.6228298 MHz

==== CHANNEL f2 =====  
CPDPRG2 waltz16  
NUC2 1H  
PCPD2 90.00 usec  
PL2 -2.00 dB  
PL12 18.23 dB  
PL13 19.00 dB  
PL2W 31.17179108 W  
PL12W 0.29563907 W  
PL13W 0.24760634 W  
SFO2 400.1316005 MHz  
SI 32768  
SF 100.6128699 MHz  
WDW EM  
SSB 0  
LB 1.00 Hz  
GB 0  
PC 1.40

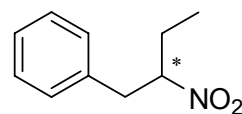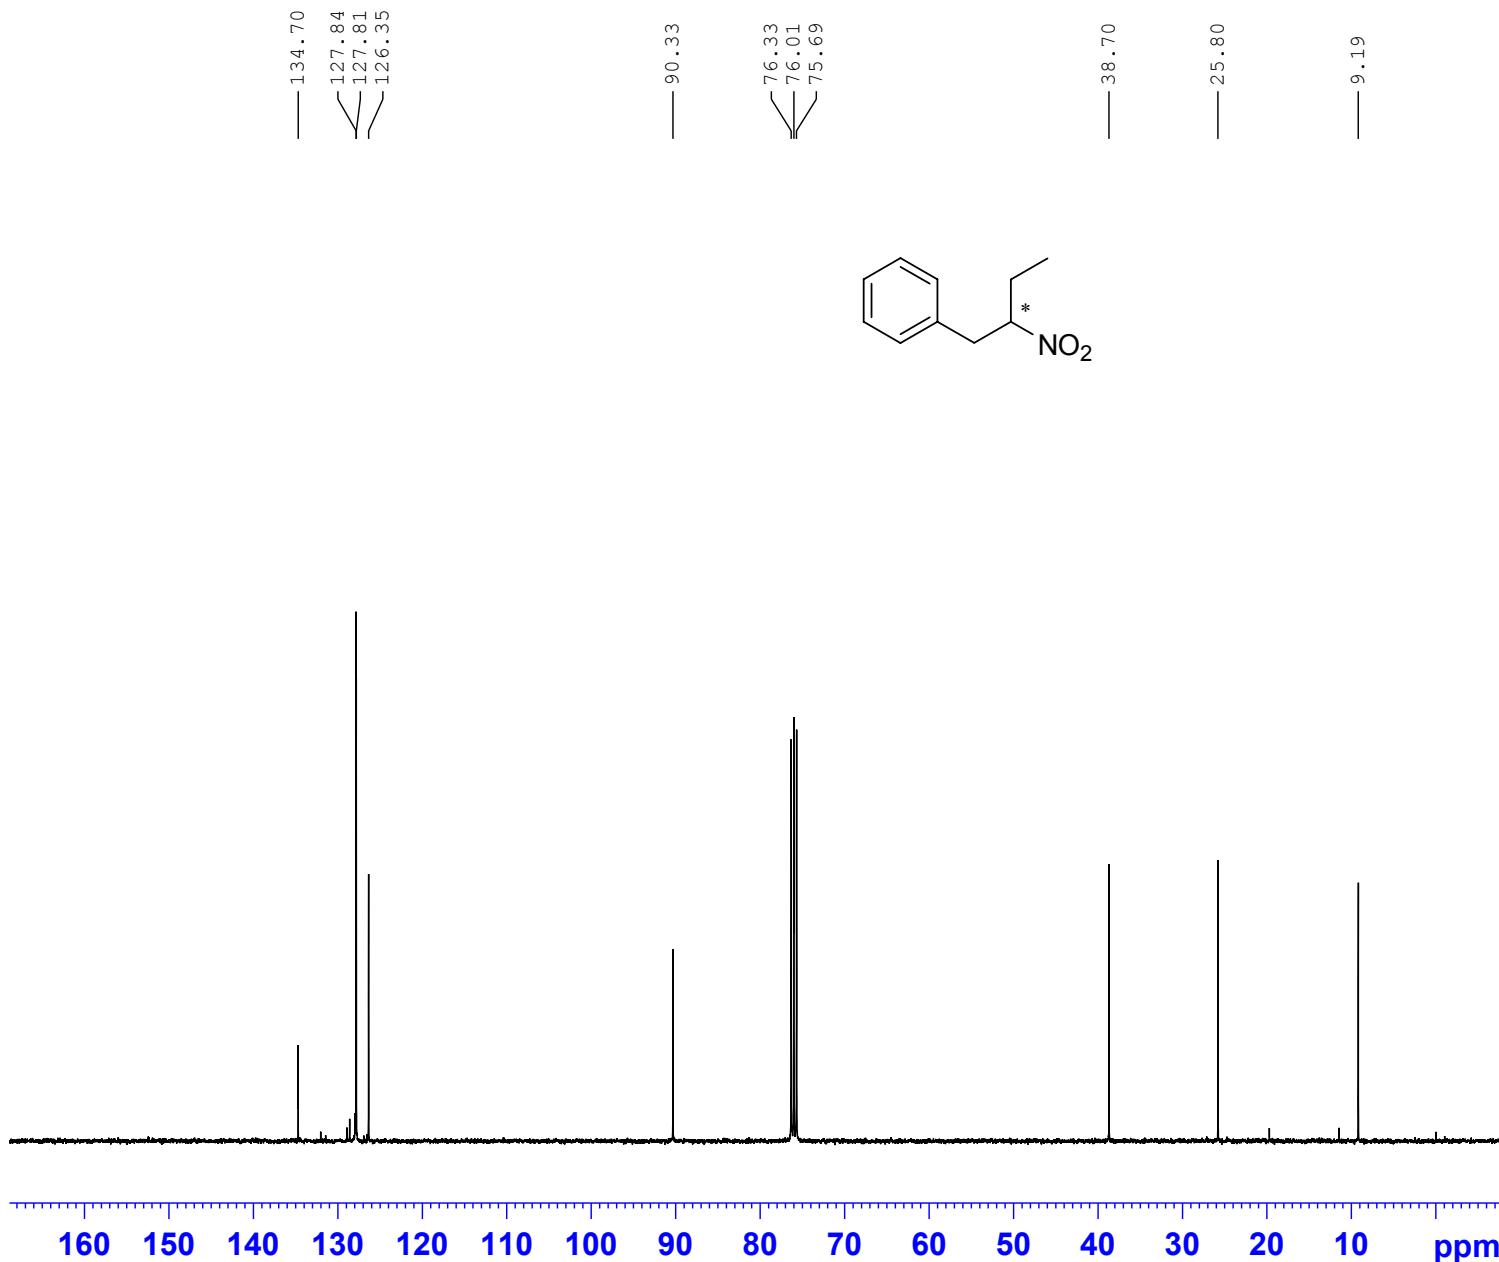



KL30 (R)  
 PROTON CDC13 {E:\NMR Data} skl 27



7.2565  
7.2435  
7.2361  
7.2331  
7.2278  
7.2231  
7.2210  
7.2026  
7.1581  
7.0473  
7.0431  
7.0391  
7.0375  
7.0336  
7.0317  
7.0257  
7.0215

4.6449  
4.6335  
4.6314  
4.6220  
4.6105  
4.6092  
4.5975  
4.5881  
4.5862  
4.5746  
3.2565  
3.2343  
3.2207  
3.1985  
3.0214  
3.0076  
2.9856  
2.9718  
2.0537  
2.0355  
2.0306  
2.0175  
2.0124  
1.9992  
1.9944  
1.9809  
1.9761  
1.9579  
1.8914  
1.8801  
1.8726  
1.8614  
1.8541  
1.8428  
1.8362  
1.8249  
1.8178  
1.8066  
1.0035  
0.9851  
0.9665

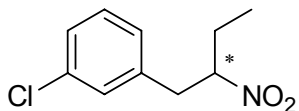

NAME Aug12-2012  
 EXPNO 1  
 PROCNO 1  
 Date\_ 20120812  
 Time\_ 10.47  
 INSTRUM spect  
 PROBHD 5 mm PABBO BB-  
 PULPROG zg30  
 TD 65536  
 SOLVENT CDC13  
 NS 44  
 DS 2  
 SWH 8223.685 Hz  
 FIDRES 0.125483 Hz  
 AQ 3.9846387 sec  
 RG 64  
 DW 60.800 usec  
 DE 6.50 usec  
 TE 303.1 K  
 D1 1.00000000 sec  
 TD0 1

===== CHANNEL f1 =====  
 NUC1 1H  
 P1 8.76 usec  
 PL1 -2.00 dB  
 PL1W 31.17179108 W  
 SFO1 400.1324710 MHz  
 SI 32768  
 SF 400.1300112 MHz  
 WDW EM  
 SSB 0  
 LB 0.30 Hz  
 GB 0  
 PC 1.00

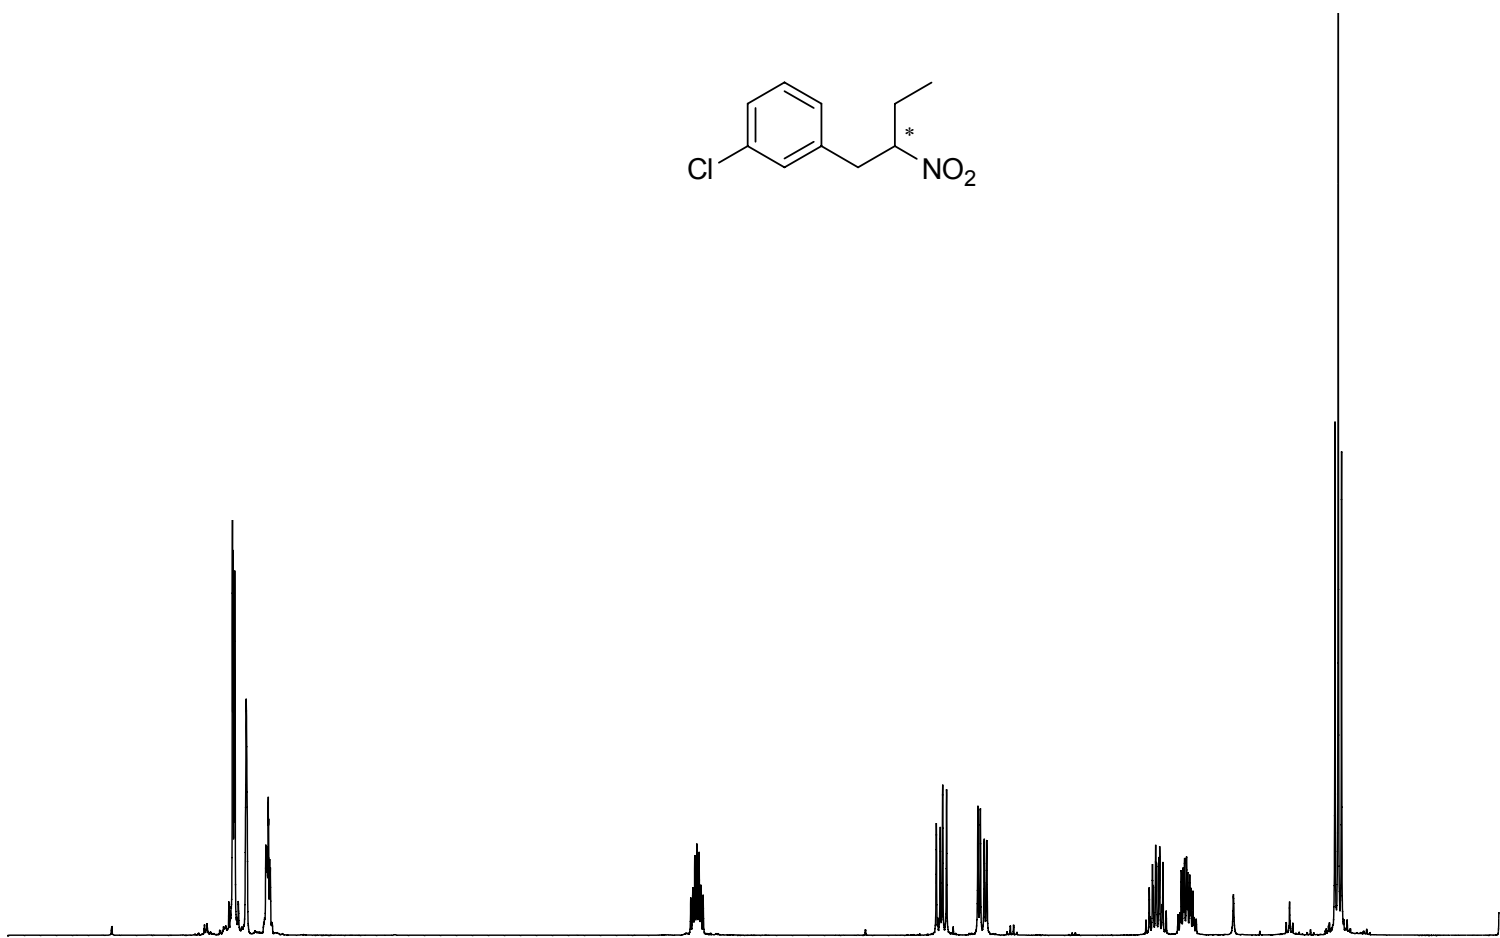

8.0 7.5 7.0 6.5 6.0 5.5 5.0 4.5 4.0 3.5 3.0 2.5 2.0 1.5 1.0 ppm

2.04  
0.98  
1.00

1.00

1.04  
1.03

1.06  
1.05

3.09

KL30 (R)  
C13CPD32 CDC13 {E:\NMR Data} skl 27



137.68  
134.60  
130.08  
129.00  
127.64  
127.03

90.93

77.36  
77.04  
76.73

39.14

26.92

10.15

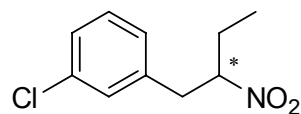

NAME Aug12-2012  
EXPNO 5  
PROCNO 1  
Date\_ 20120812  
Time\_ 13.01  
INSTRUM spect  
PROBHD 5 mm PABBO BB-  
PULPROG zgpg30  
TD 65536  
SOLVENT CDC13  
NS 1024  
DS 2  
SWH 24038.461 Hz  
FIDRES 0.366798 Hz  
AQ 1.3631988 sec  
RG 2050  
DW 20.800 usec  
DE 6.50 usec  
TE 305.0 K  
D1 2.00000000 sec  
D11 0.03000000 sec  
TD0 1

==== CHANNEL f1 =====  
NUC1 13C  
P1 8.50 usec  
PL1 1.00 dB  
PL1W 75.02186584 W  
SFO1 100.6228298 MHz

==== CHANNEL f2 =====  
CPDPRG2 waltz16  
NUC2 1H  
PCPD2 90.00 usec  
PL2 -2.00 dB  
PL12 18.23 dB  
PL13 19.00 dB  
PL2W 31.17179108 W  
PL12W 0.29563907 W  
PL13W 0.24760634 W  
SFO2 400.1316005 MHz  
SI 32768  
SF 100.6127690 MHz  
WDW EM  
SSB 0  
LB 1.00 Hz  
GB 0  
PC 1.40

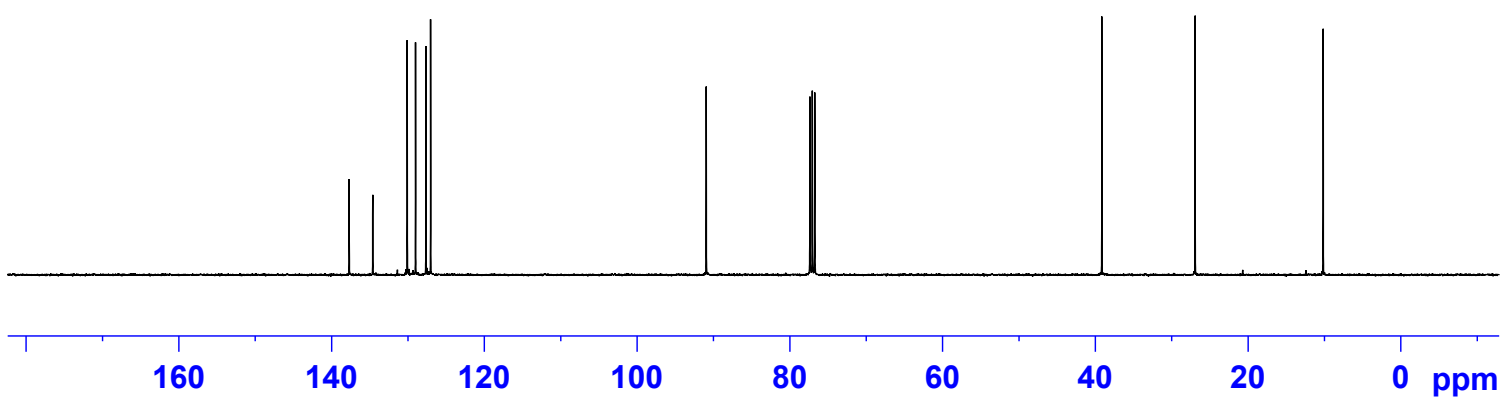

KL31(R)  
 PROTON CDCl3 {E:\NMR Data} skl 28

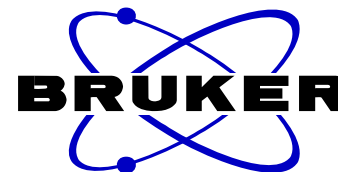

7.1803  
 7.1600  
 7.1403  
 7.1205  
 6.7316  
 6.7260  
 6.7109  
 6.7060  
 6.6752  
 6.6563  
 6.6226  
 6.6177  
 6.6130

4.5852  
 4.5741  
 4.5703  
 4.5619  
 4.5601  
 4.5500  
 4.5382  
 4.5297  
 4.5259  
 4.5149  
 3.7085  
 3.1921  
 3.1710  
 3.1568  
 3.1357  
 2.9446  
 2.9297  
 2.9092  
 2.8943  
 1.9731  
 1.9682  
 1.9550  
 1.9498  
 1.9369  
 1.9317  
 1.9187  
 1.9136  
 1.9003  
 1.8954  
 1.8771  
 1.8139  
 1.8028  
 1.7951  
 1.7842  
 1.7766  
 1.7656  
 1.7587  
 1.7477  
 1.7404  
 1.7294  
 1.7218  
 1.7108  
 0.9210

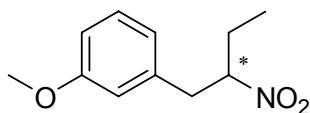

NAME Aug12-2012  
 EXPNO 2  
 PROCNO 1  
 Date\_ 20120812  
 Time\_ 10.56  
 INSTRUM spect  
 PROBHD 5 mm PABBO BB-  
 PULPROG zg30  
 TD 65536  
 SOLVENT CDCl3  
 NS 44  
 DS 2  
 SWH 8223.685 Hz  
 FIDRES 0.125483 Hz  
 AQ 3.9846387 sec  
 RG 161  
 DW 60.800 usec  
 DE 6.50 usec  
 TE 303.0 K  
 D1 1.00000000 sec  
 TD0 1

===== CHANNEL f1 =====  
 NUC1 1H  
 P1 8.76 usec  
 PL1 -2.00 dB  
 PL1W 31.17179108 W  
 SFO1 400.1324710 MHz  
 SI 32768  
 SF 400.1300417 MHz  
 WDW EM  
 SSB 0  
 LB 0.30 Hz  
 GB 0  
 PC 1.00

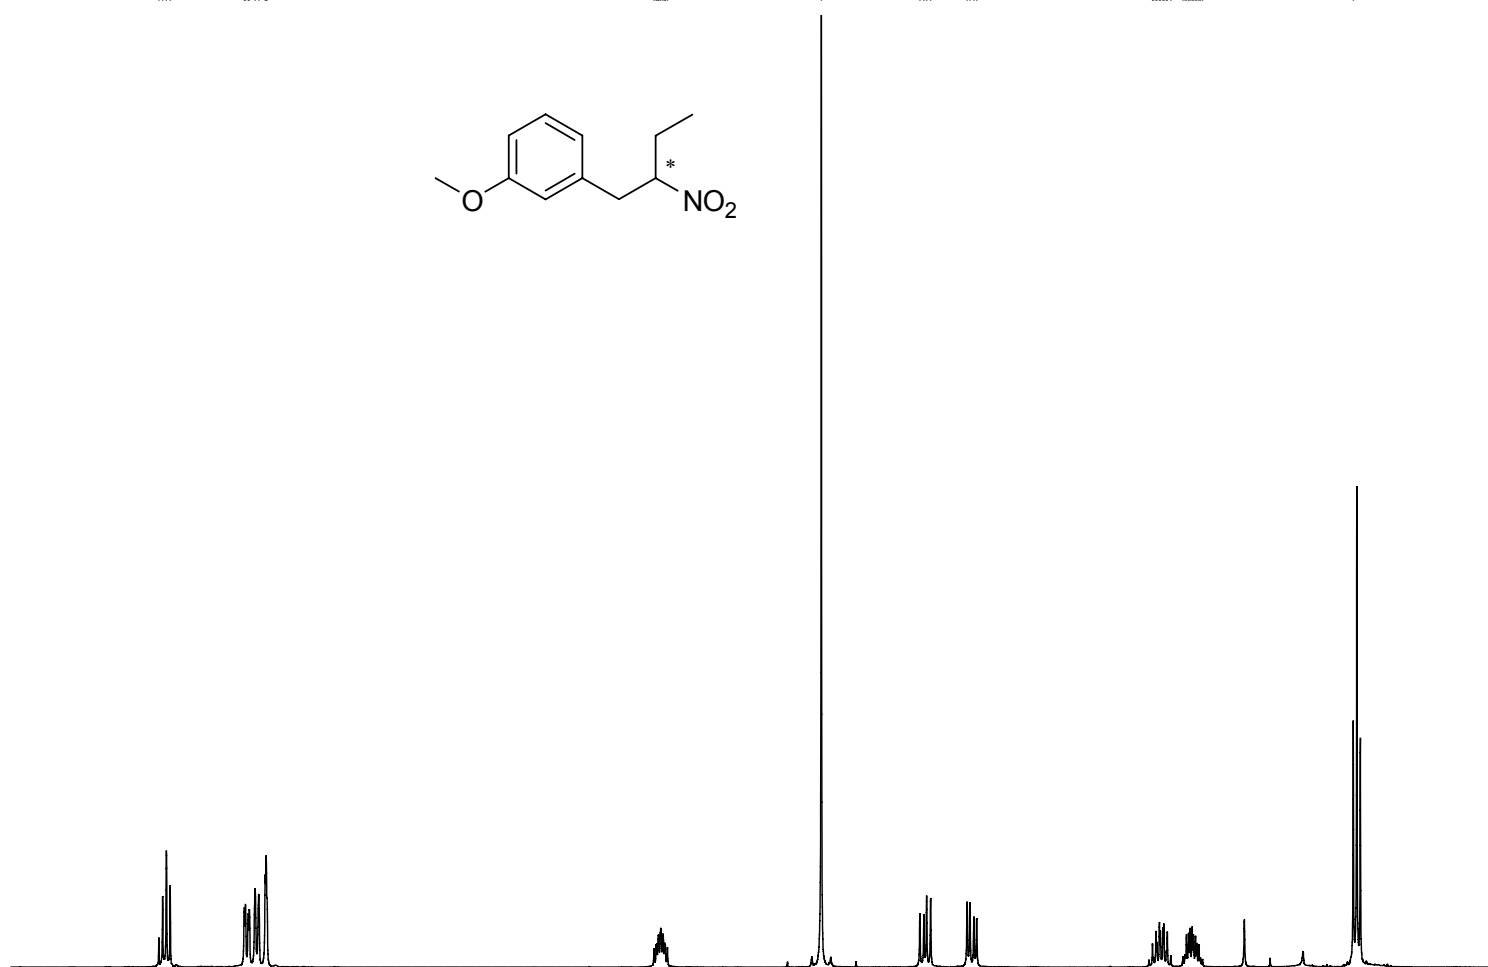

7.5 7.0 6.5 6.0 5.5 5.0 4.5 4.0 3.5 3.0 2.5 2.0 1.5 1.0 ppm

1.00  
 1.01  
 1.01  
 0.99

1.00

3.05

1.02

1.02

1.02

1.04

3.00

KL31 (R)  
C13CPD32 CDC13 {E:\NMR Data} skl 28



NAME Aug12-2012  
EXPNO 9  
PROCNO 1  
Date\_ 20120812  
Time\_ 15.54  
INSTRUM spect  
PROBHD 5 mm PABBO BB-  
PULPROG zgpg30  
TD 65536  
SOLVENT CDC13  
NS 1024  
DS 2  
SWH 24038.461 Hz  
FIDRES 0.366798 Hz  
AQ 1.3631988 sec  
RG 2050  
DW 20.800 usec  
DE 6.50 usec  
TE 305.5 K  
D1 2.00000000 sec  
D11 0.03000000 sec  
TD0 1

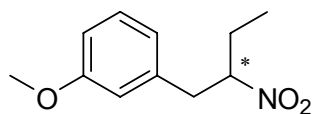

==== CHANNEL f1 =====  
NUC1 13C  
P1 8.50 usec  
PL1 1.00 dB  
PL1W 75.02186584 W  
SFO1 100.6228298 MHz

==== CHANNEL f2 =====  
CPDPRG2 waltz16  
NUC2 1H  
PCPD2 90.00 usec  
PL2 -2.00 dB  
PL12 18.23 dB  
PL13 19.00 dB  
PL2W 31.17179108 W  
PL12W 0.29563907 W  
PL13W 0.24760634 W  
SFO2 400.1316005 MHz  
SI 32768  
SF 100.6127690 MHz  
WDW EM  
SSB 0  
LB 1.00 Hz  
GB 0  
PC 1.40

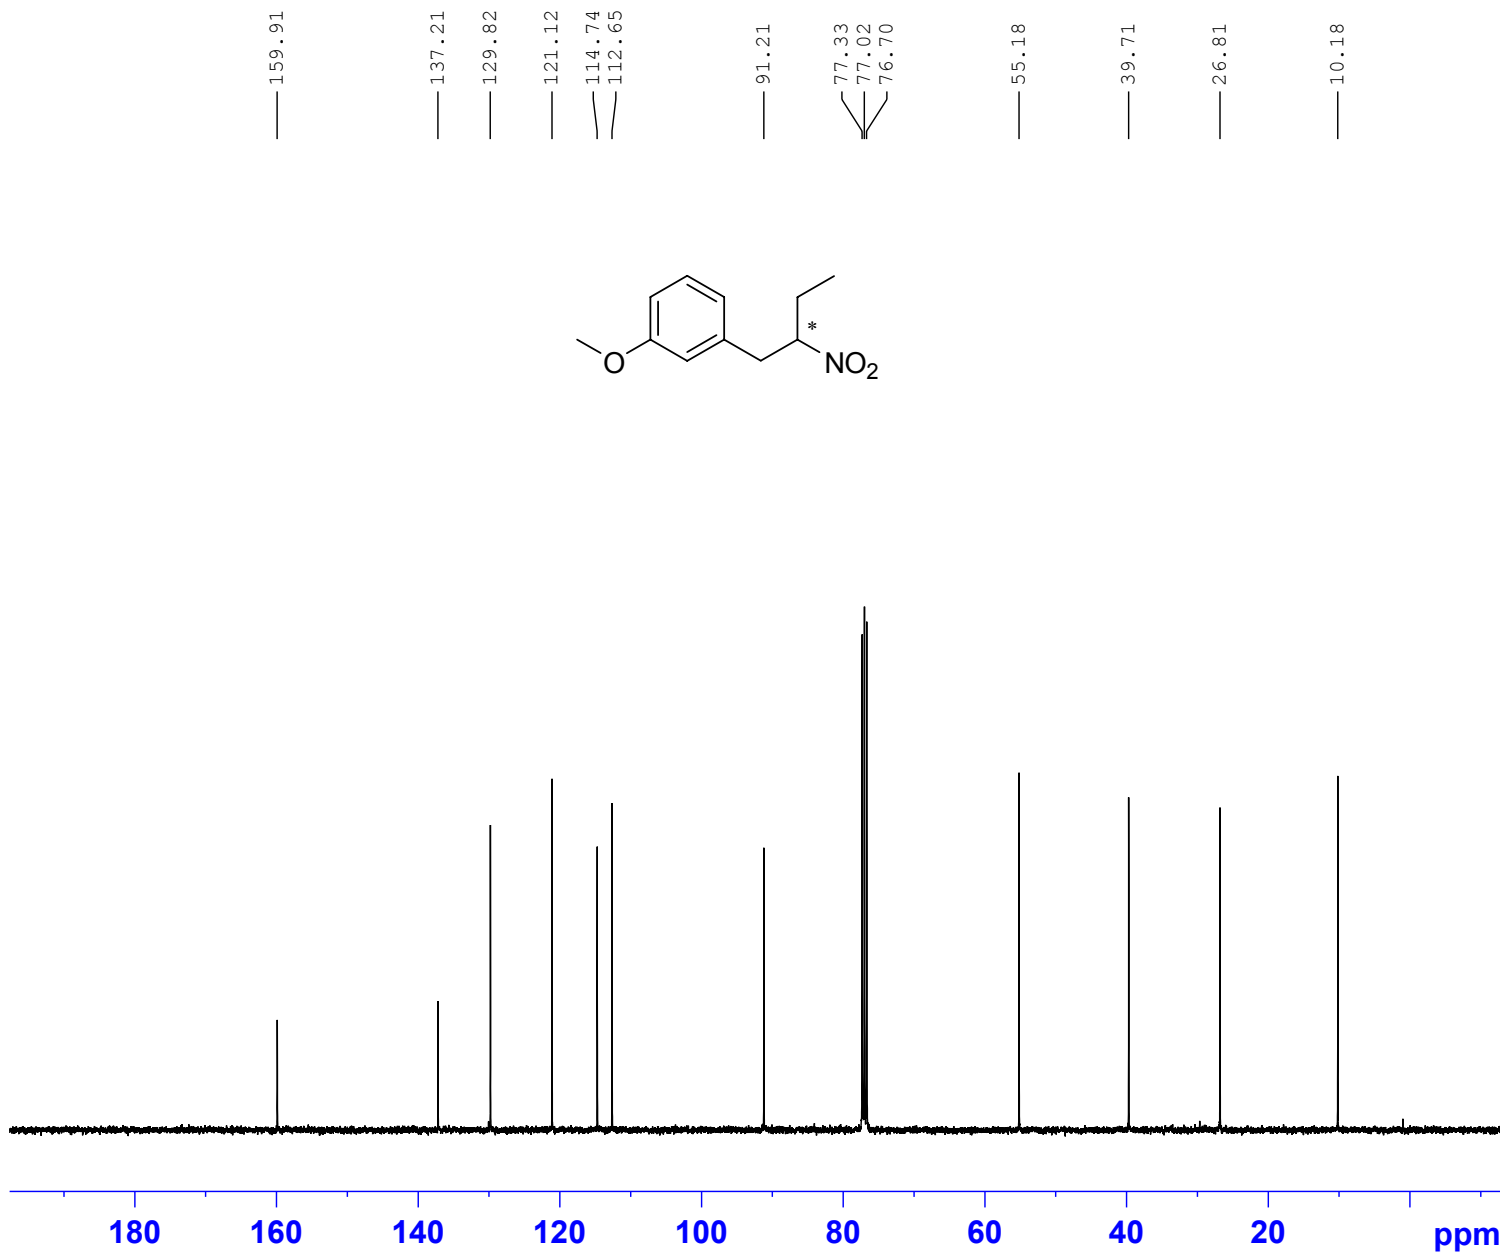

KL32 (R)  
 PROTON CDCl3 {E:\NMR Data} skl 14



7.2569  
 7.0839  
 7.0772  
 7.0558  
 6.8494  
 6.8420  
 6.8370  
 6.8253  
 6.8205

4.6109  
 4.5996  
 4.5965  
 4.5868  
 4.5757  
 4.5645  
 4.5548  
 4.5517  
 4.5405  
 3.7783  
 3.2193  
 3.1979  
 3.1836  
 3.1622  
 2.9941  
 2.9795  
 2.9584  
 2.9438  
 2.0413  
 2.0362  
 2.0231  
 2.0178  
 2.0051  
 1.9997  
 1.9868  
 1.9816  
 1.9683  
 1.9634  
 1.9451  
 1.8743  
 1.8633  
 1.8556  
 1.8447  
 1.8371  
 1.8262  
 1.8191  
 1.8081  
 1.8009  
 1.7899  
 1.7823  
 0.9917

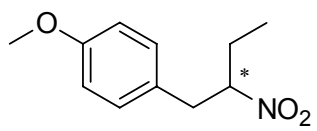

NAME Aug13-2012  
 EXPNO 3  
 PROCNO 1  
 Date\_ 20120813  
 Time\_ 19.34  
 INSTRUM spect  
 PROBHD 5 mm PABBO BB-  
 PULPROG zg30  
 TD 65536  
 SOLVENT CDCl3  
 NS 32  
 DS 2  
 SWH 8223.685 Hz  
 FIDRES 0.125483 Hz  
 AQ 3.9846387 sec  
 RG 256  
 DW 60.800 usec  
 DE 6.50 usec  
 TE 301.5 K  
 D1 1.00000000 sec  
 TD0 1

==== CHANNEL f1 =====  
 NUC1 1H  
 P1 8.76 usec  
 PL1 -2.00 dB  
 PL1W 31.17179108 W  
 SFO1 400.1324710 MHz  
 SI 32768  
 SF 400.1300112 MHz  
 WDW EM  
 SSB 0  
 LB 0.30 Hz  
 GB 0  
 PC 1.00

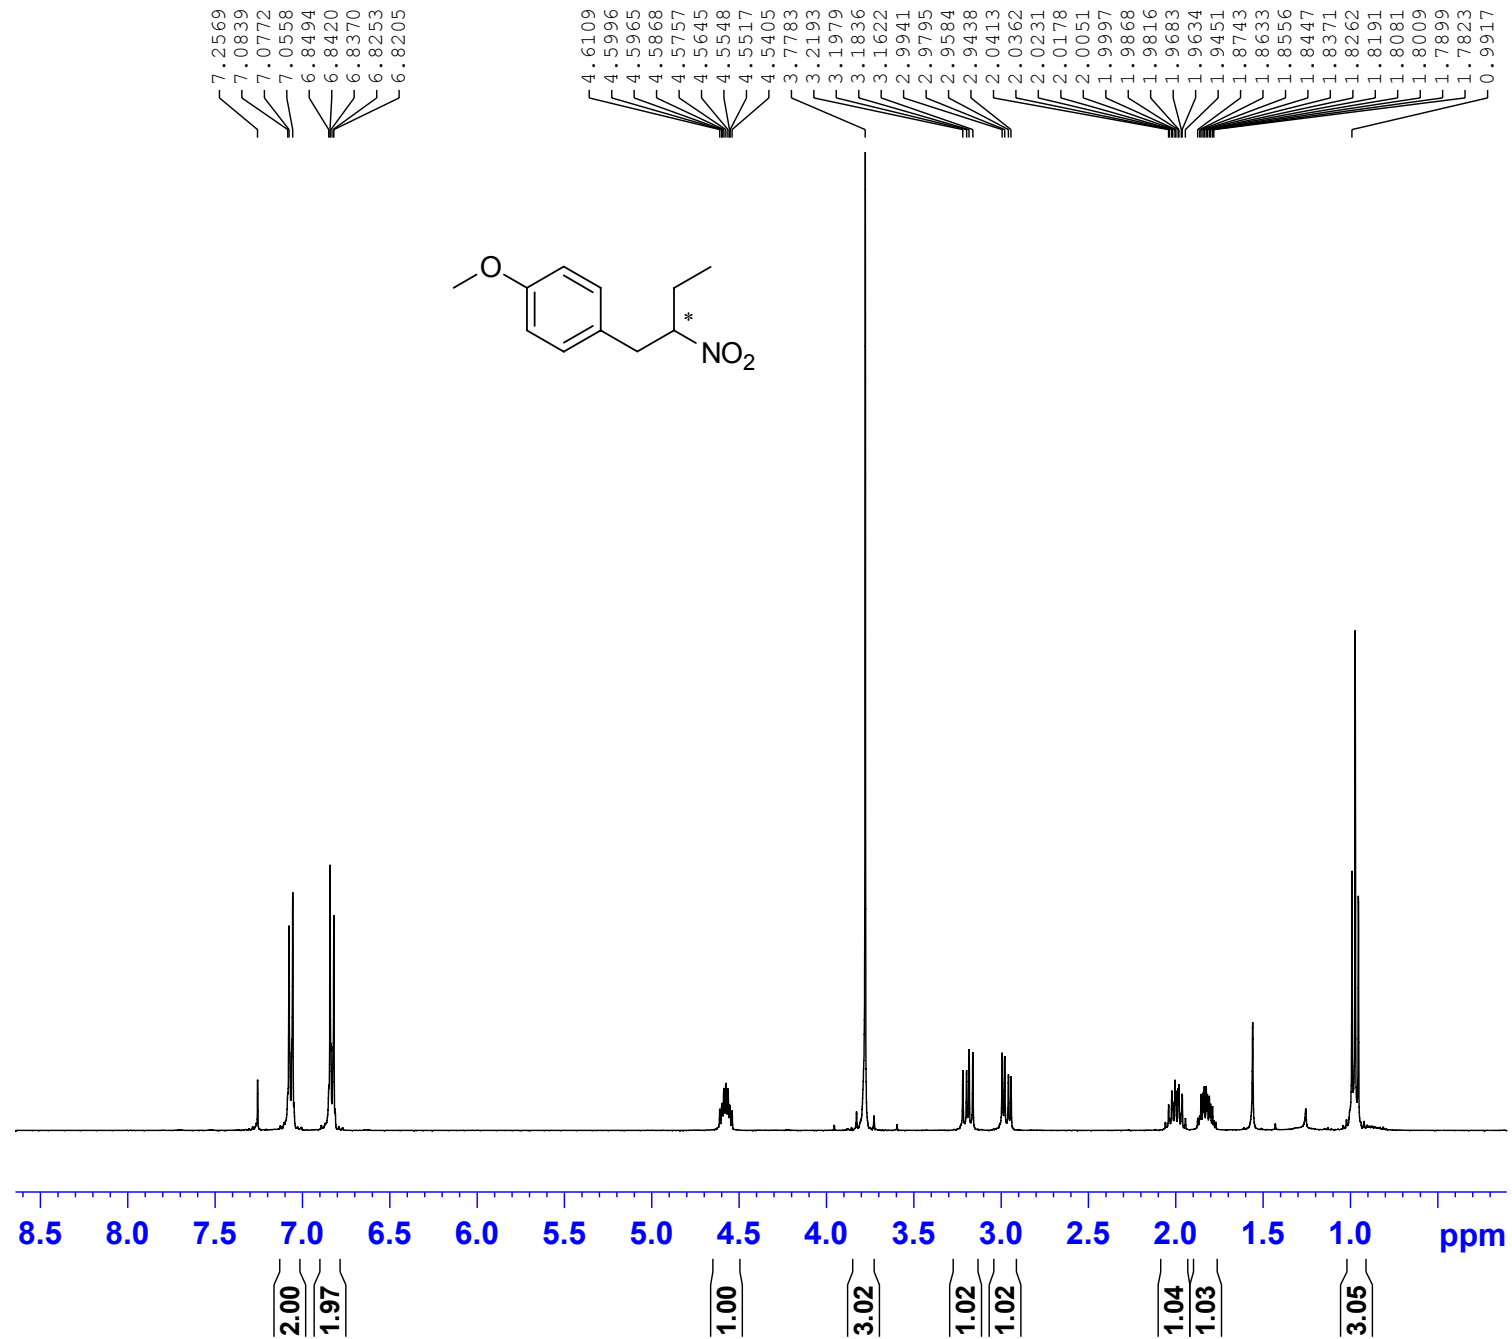

KL32 (R)  
C13CPD CDC13 {E:\NMR Data} skl 14



NAME Aug13-2012  
EXPNO 11  
PROCNO 1  
Date\_ 20120814  
Time\_ 2.04  
INSTRUM spect  
PROBHD 5 mm PABBO BB-  
PULPROG zgpg30  
TD 65536  
SOLVENT CDC13  
NS 2048  
DS 4  
SWH 24038.461 Hz  
FIDRES 0.366798 Hz  
AQ 1.3631988 sec  
RG 2050  
DW 20.800 usec  
DE 6.50 usec  
TE 305.0 K  
D1 2.00000000 sec  
D11 0.03000000 sec  
TD0 1

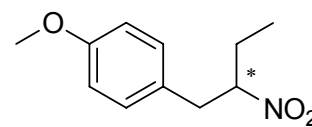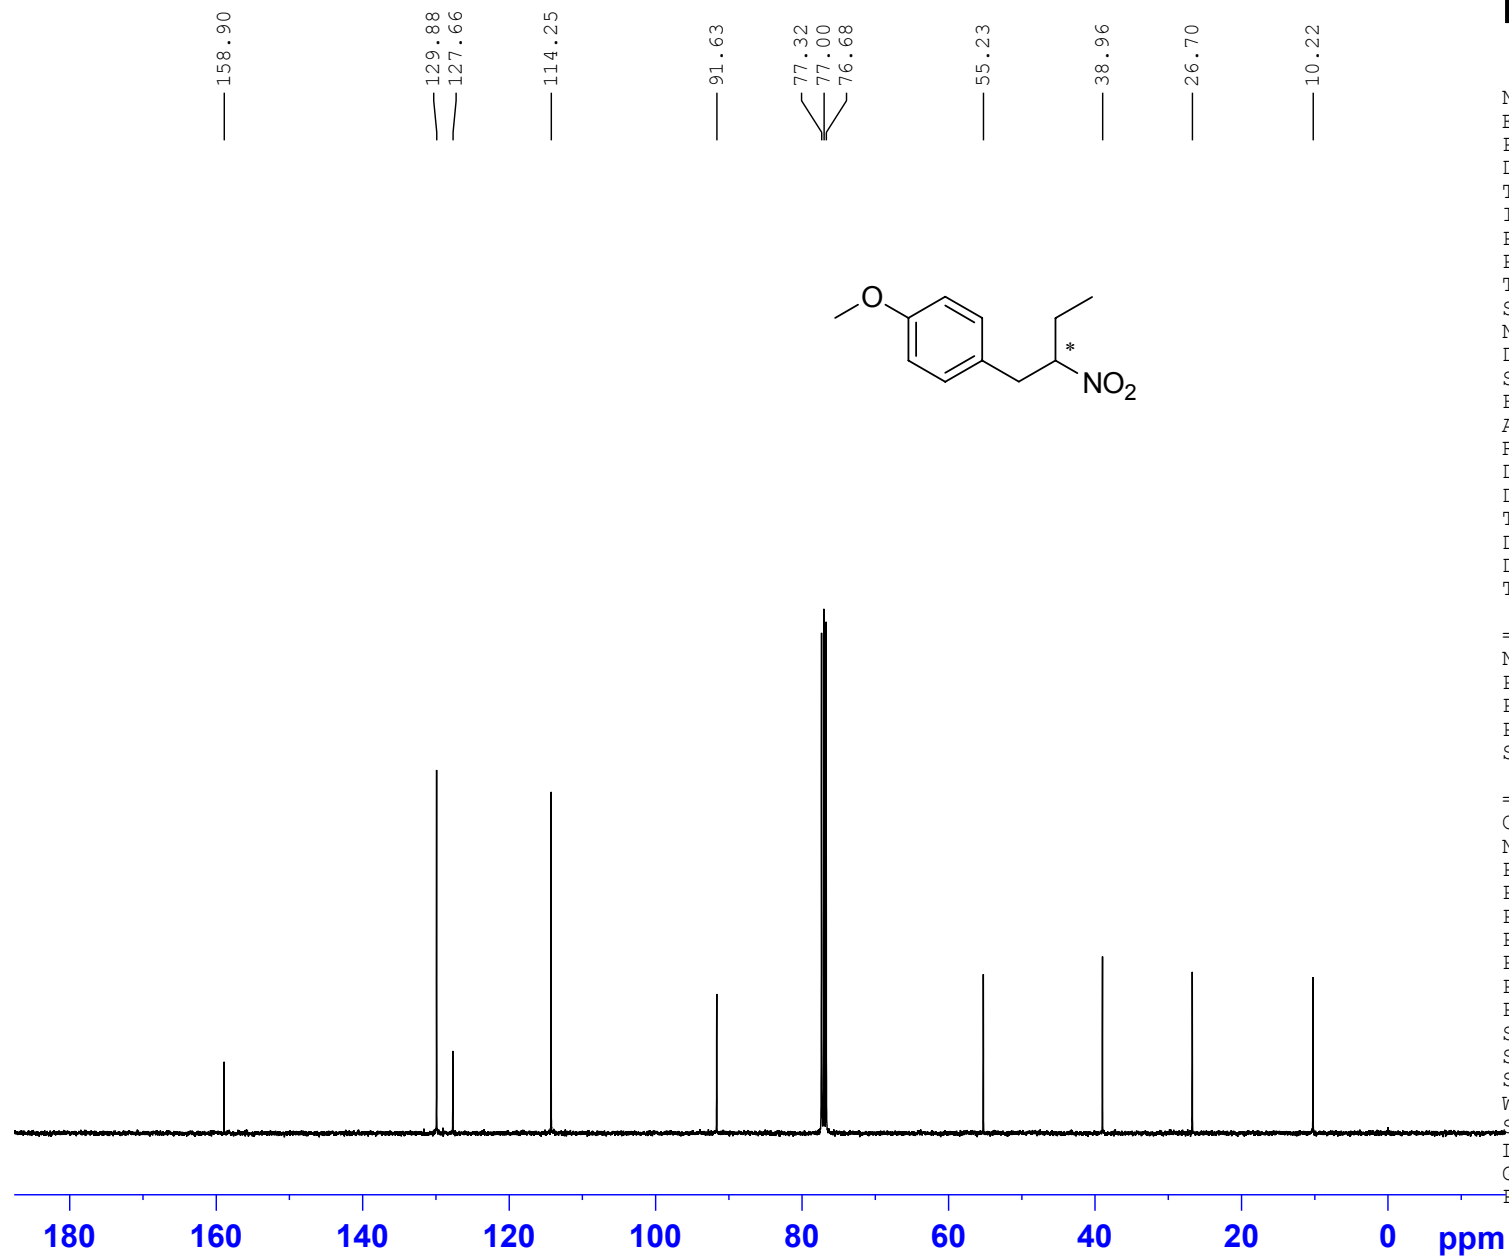

==== CHANNEL f1 =====  
NUC1 13C  
P1 8.50 usec  
PL1 1.00 dB  
PL1W 75.02186584 W  
SFO1 100.6228298 MHz

==== CHANNEL f2 =====  
CPDPRG2 waltz16  
NUC2 1H  
PCPD2 90.00 usec  
PL2 -2.00 dB  
PL12 18.23 dB  
PL13 19.00 dB  
PL2W 31.17179108 W  
PL12W 0.29563907 W  
PL13W 0.24760634 W  
SFO2 400.1316005 MHz  
SI 32768  
SF 100.6127690 MHz  
WDW EM  
SSB 0  
LB 1.00 Hz  
GB 0  
PC 1.40

KL23(R)  
 PROTON CDC13 {E:\NMR Data} skl 2



8.5417  
 8.5276  
 8.5012

7.7641  
 7.7442  
 7.5044  
 7.4900  
 7.4847  
 7.4704  
 7.2732

4.8456  
 4.8325  
 4.8286  
 4.8237  
 4.8158  
 4.8108  
 4.8069  
 4.7939

3.4015  
 3.3796  
 3.3647  
 3.3428  
 3.1662  
 3.1533  
 3.1294  
 3.1165

1.6556  
 1.6388

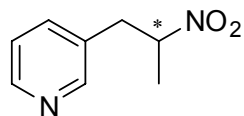

NAME Aug01-2012  
 EXPNO 5  
 PROCNO 1  
 Date\_ 20120801  
 Time\_ 17.03  
 INSTRUM spect  
 PROBHD 5 mm PABBO BB-  
 PULPROG zg30  
 TD 65536  
 SOLVENT CDC13  
 NS 44  
 DS 2  
 SWH 8223.685 Hz  
 FIDRES 0.125483 Hz  
 AQ 3.9846387 sec  
 RG 228  
 DW 60.800 usec  
 DE 6.50 usec  
 TE 300.7 K  
 D1 1.00000000 sec  
 TD0 1

===== CHANNEL f1 =====  
 NUC1 1H  
 P1 8.76 usec  
 PL1 -2.00 dB  
 PL1W 31.17179108 W  
 SFO1 400.1324710 MHz  
 SI 32768  
 SF 400.1300047 MHz  
 WDW EM  
 SSB 0  
 LB 0.30 Hz  
 GB 0  
 PC 1.00

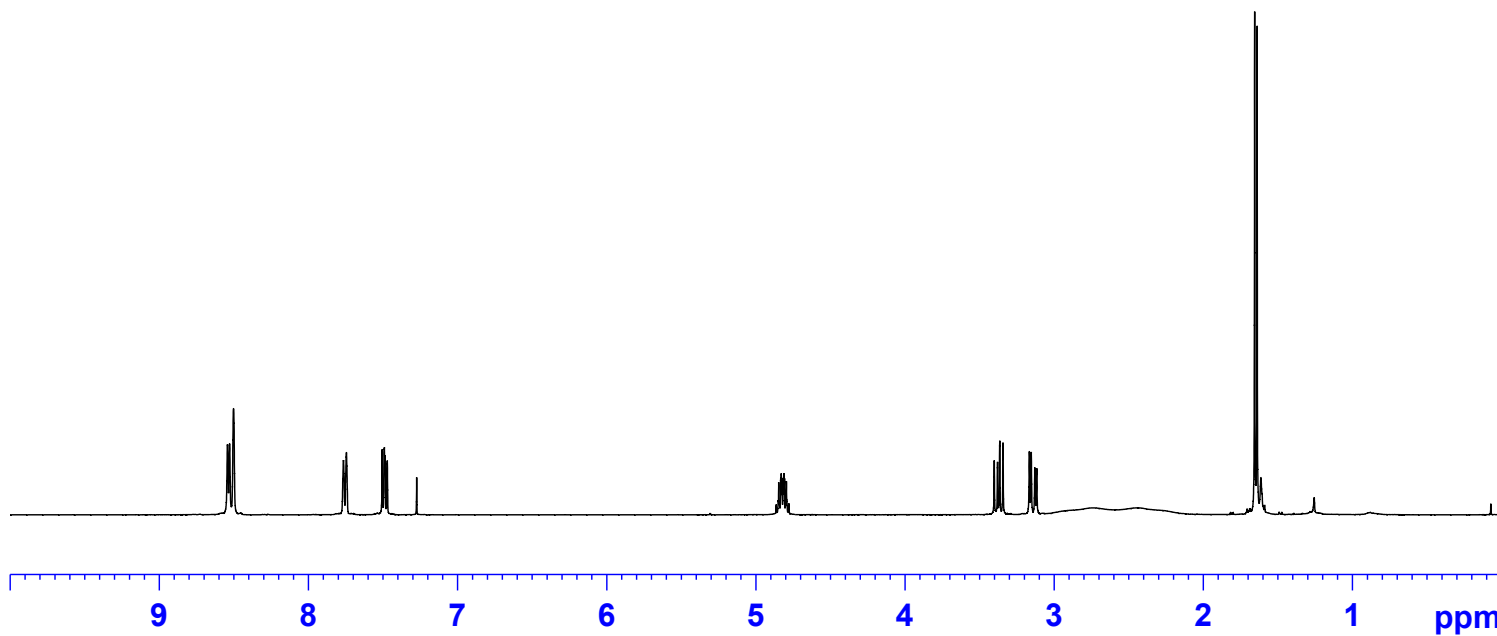

0.99  
 0.96

0.97  
 0.97

1.00

1.00  
 1.08

3.06

KL23(R)  
C13CPD CDC13 {E:\NMR Data} skl 2



147.78  
146.60  
139.58  
133.92  
125.45

83.21  
77.36  
77.04  
76.72

37.53

19.16

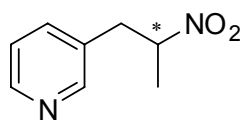

NAME Aug01-2012  
EXPNO 10  
PROCNO 1  
Date\_ 20120802  
Time\_ 2.42  
INSTRUM spect  
PROBHD 5 mm PABBO BB-  
PULPROG zgpg30  
TD 65536  
SOLVENT CDC13  
NS 1024  
DS 4  
SWH 24038.461 Hz  
FIDRES 0.366798 Hz  
AQ 1.3631988 sec  
RG 2050  
DW 20.800 usec  
DE 6.50 usec  
TE 302.5 K  
D1 2.00000000 sec  
D11 0.03000000 sec  
TD0 1

==== CHANNEL f1 =====  
NUC1 13C  
P1 8.50 usec  
PL1 1.00 dB  
PL1W 75.02186584 W  
SFO1 100.6228298 MHz

==== CHANNEL f2 =====  
CPDPRG2 waltz16  
NUC2 1H  
PCPD2 90.00 usec  
PL2 -2.00 dB  
PL12 18.23 dB  
PL13 19.00 dB  
PL2W 31.17179108 W  
PL12W 0.29563907 W  
PL13W 0.24760634 W  
SFO2 400.1316005 MHz  
SI 32768  
SF 100.6127690 MHz  
WDW EM  
SSB 0  
LB 1.00 Hz  
GB 0  
PC 1.40

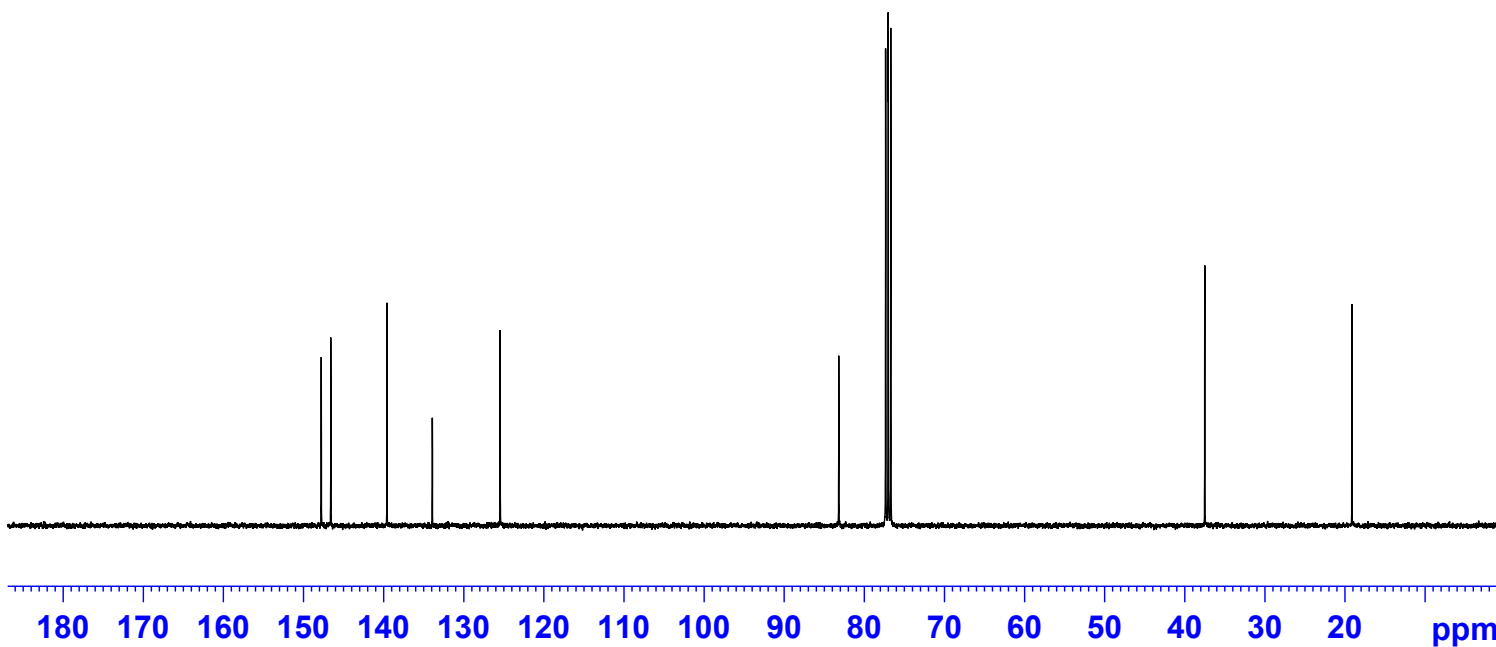



KL22 (R)  
 PROTON CDCl3 {E:\NMR Data} skl 1



```

NAME      Aug01-2012
EXPNO     6
PROCNO    1
Date_     20120801
Time_     22.36
INSTRUM   spect
PROBHD    5 mm PABBO BB-
PULPROG   zg30
TD        65536
SOLVENT   CDC13
NS        44
DS        2
SWH       8223.685 Hz
FIDRES    0.125483 Hz
AQ        3.9846387 sec
RG        362
DW        60.800 usec
DE        6.50 usec
TE        301.3 K
D1        1.00000000 sec
TD0       1
  
```

7.3365  
7.3331  
7.2608

6.3024  
6.2975  
6.2945  
6.2898  
6.1291  
6.1214

4.8664  
4.8494  
4.8324  
4.8154

3.3940  
3.3760  
3.3559  
3.3378  
3.1119  
3.0956  
3.0738  
3.0574

1.5764  
1.5598

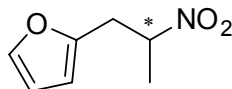

```

===== CHANNEL f1 =====
NUC1      1H
P1        8.76 usec
PL1       -2.00 dB
PL1W      31.17179108 W
SFO1      400.1324710 MHz
SI        32768
SF        400.1300096 MHz
WDW       EM
SSB       0
LB        0.30 Hz
GB        0
PC        1.00
  
```

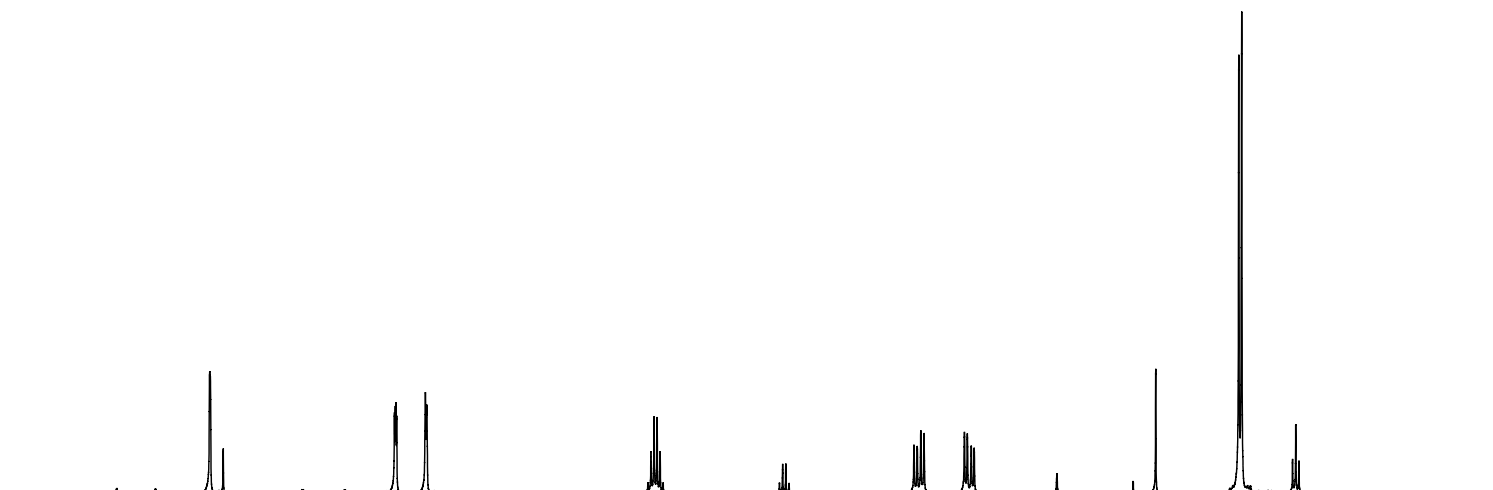

8.0 7.5 7.0 6.5 6.0 5.5 5.0 4.5 4.0 3.5 3.0 2.5 2.0 1.5 1.0 ppm

0.98

1.00  
1.00

1.01

1.00  
1.04

3.29

KL22 (R)  
C13CPD CDC13 {E:\NMR Data} skl 1



NAME Aug01-2012  
EXPNO 8  
PROCNO 1  
Date\_ 20120802  
Time\_ 1.07  
INSTRUM spect  
PROBHD 5 mm PABBO BB-  
PULPROG zgpg30  
TD 65536  
SOLVENT CDC13  
NS 2048  
DS 4  
SWH 24038.461 Hz  
FIDRES 0.366798 Hz  
AQ 1.3631988 sec  
RG 2050  
DW 20.800 usec  
DE 6.50 usec  
TE 302.7 K  
D1 2.00000000 sec  
D11 0.03000000 sec  
TD0 1

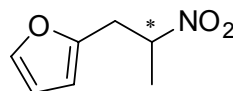

149.36  
142.29  
110.47  
108.02  
81.78  
77.32  
77.00  
76.69  
33.44  
18.81

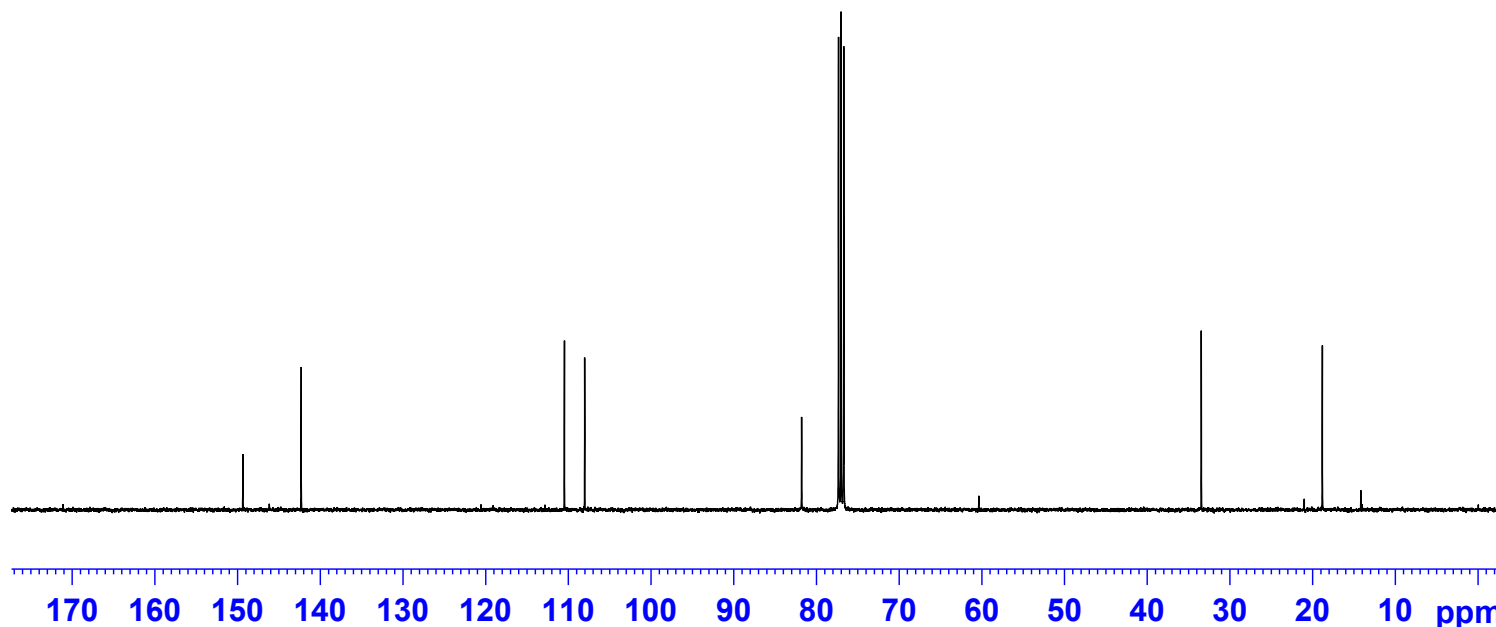

==== CHANNEL f1 =====  
NUC1 13C  
P1 8.50 usec  
PL1 1.00 dB  
PL1W 75.02186584 W  
SFO1 100.6228298 MHz

==== CHANNEL f2 =====  
CPDPRG2 waltz16  
NUC2 1H  
PCPD2 90.00 usec  
PL2 -2.00 dB  
PL12 18.23 dB  
PL13 19.00 dB  
PL2W 31.17179108 W  
PL12W 0.29563907 W  
PL13W 0.24760634 W  
SFO2 400.1316005 MHz  
SI 32768  
SF 100.6127690 MHz  
WDW EM  
SSB 0  
LB 1.00 Hz  
GB 0  
PC 1.40

KL34 (R)  
PROTON CDCl3 {E:\NMR Data} skl 28



7.2570  
7.2045  
7.2018  
7.1916  
7.1889  
6.9526  
6.9439  
6.9398  
6.9311  
6.8557  
6.8547  
6.8474

4.8033  
4.7864  
4.7690  
4.7520

3.5714  
3.5529  
3.5337  
3.5152  
3.2760  
3.2599  
3.2383  
3.2222

1.5943  
1.5776

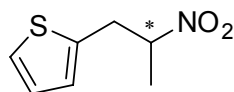

NAME Sep21-2012  
EXPNO 1  
PROCNO 1  
Date\_ 20120921  
Time\_ 17.33  
INSTRUM spect  
PROBHD 5 mm PABBO BB-  
PULPROG zg30  
TD 65536  
SOLVENT CDCl3  
NS 32  
DS 2  
SWH 8223.685 Hz  
FIDRES 0.125483 Hz  
AQ 3.9846387 sec  
RG 362  
DW 60.800 usec  
DE 6.50 usec  
TE 302.0 K  
D1 1.00000000 sec  
TD0 1

===== CHANNEL f1 =====  
NUC1 1H  
P1 8.76 usec  
PL1 -2.00 dB  
PL1W 31.17179108 W  
SFO1 400.1324710 MHz  
SI 32768  
SF 400.1300110 MHz  
WDW EM  
SSB 0  
LB 0.30 Hz  
GB 0  
PC 1.00

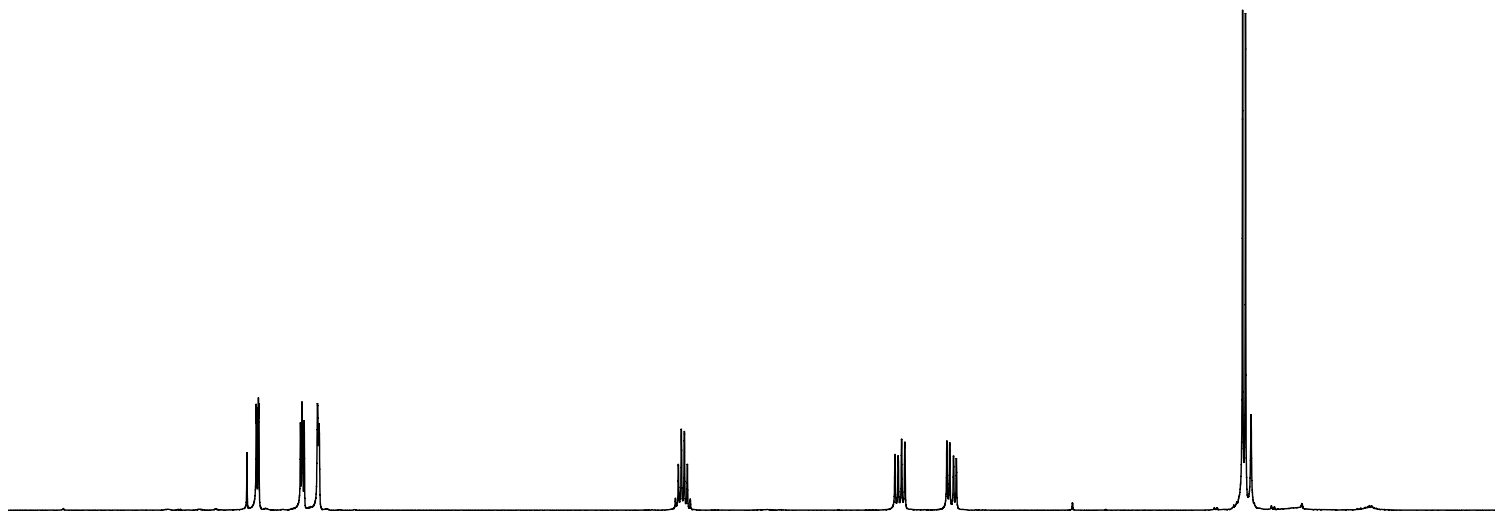

8.0 7.5 7.0 6.5 6.0 5.5 5.0 4.5 4.0 3.5 3.0 2.5 2.0 1.5 1.0 ppm

0.97  
0.99  
1.01

1.00

1.03  
1.02

3.08

KL34 (R)  
C13CPD CDC13 {E:\NMR Data} skl 28



NAME Sep21-2012  
EXPNO 9  
PROCNO 1  
Date\_ 20120922  
Time\_ 6.17  
INSTRUM spect  
PROBHD 5 mm PABBO BB-  
PULPROG zgpg30  
TD 65536  
SOLVENT CDC13  
NS 2048  
DS 4  
SWH 24038.461 Hz  
FIDRES 0.366798 Hz  
AQ 1.3631988 sec  
RG 2050  
DW 20.800 usec  
DE 6.50 usec  
TE 303.7 K  
D1 2.00000000 sec  
D11 0.03000000 sec  
TD0 1

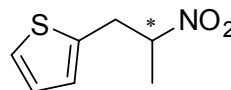

===== CHANNEL f1 =====  
NUC1 13C  
P1 8.50 usec  
PL1 1.00 dB  
PL1W 75.02186584 W  
SFO1 100.6228298 MHz

===== CHANNEL f2 =====  
CPDPRG2 waltz16  
NUC2 1H  
PCPD2 90.00 usec  
PL2 -2.00 dB  
PL12 18.23 dB  
PL13 19.00 dB  
PL2W 31.17179108 W  
PL12W 0.29563907 W  
PL13W 0.24760634 W  
SFO2 400.1316005 MHz  
SI 32768  
SF 100.6127663 MHz  
WDW EM  
SSB 0  
LB 1.00 Hz  
GB 0  
PC 1.40

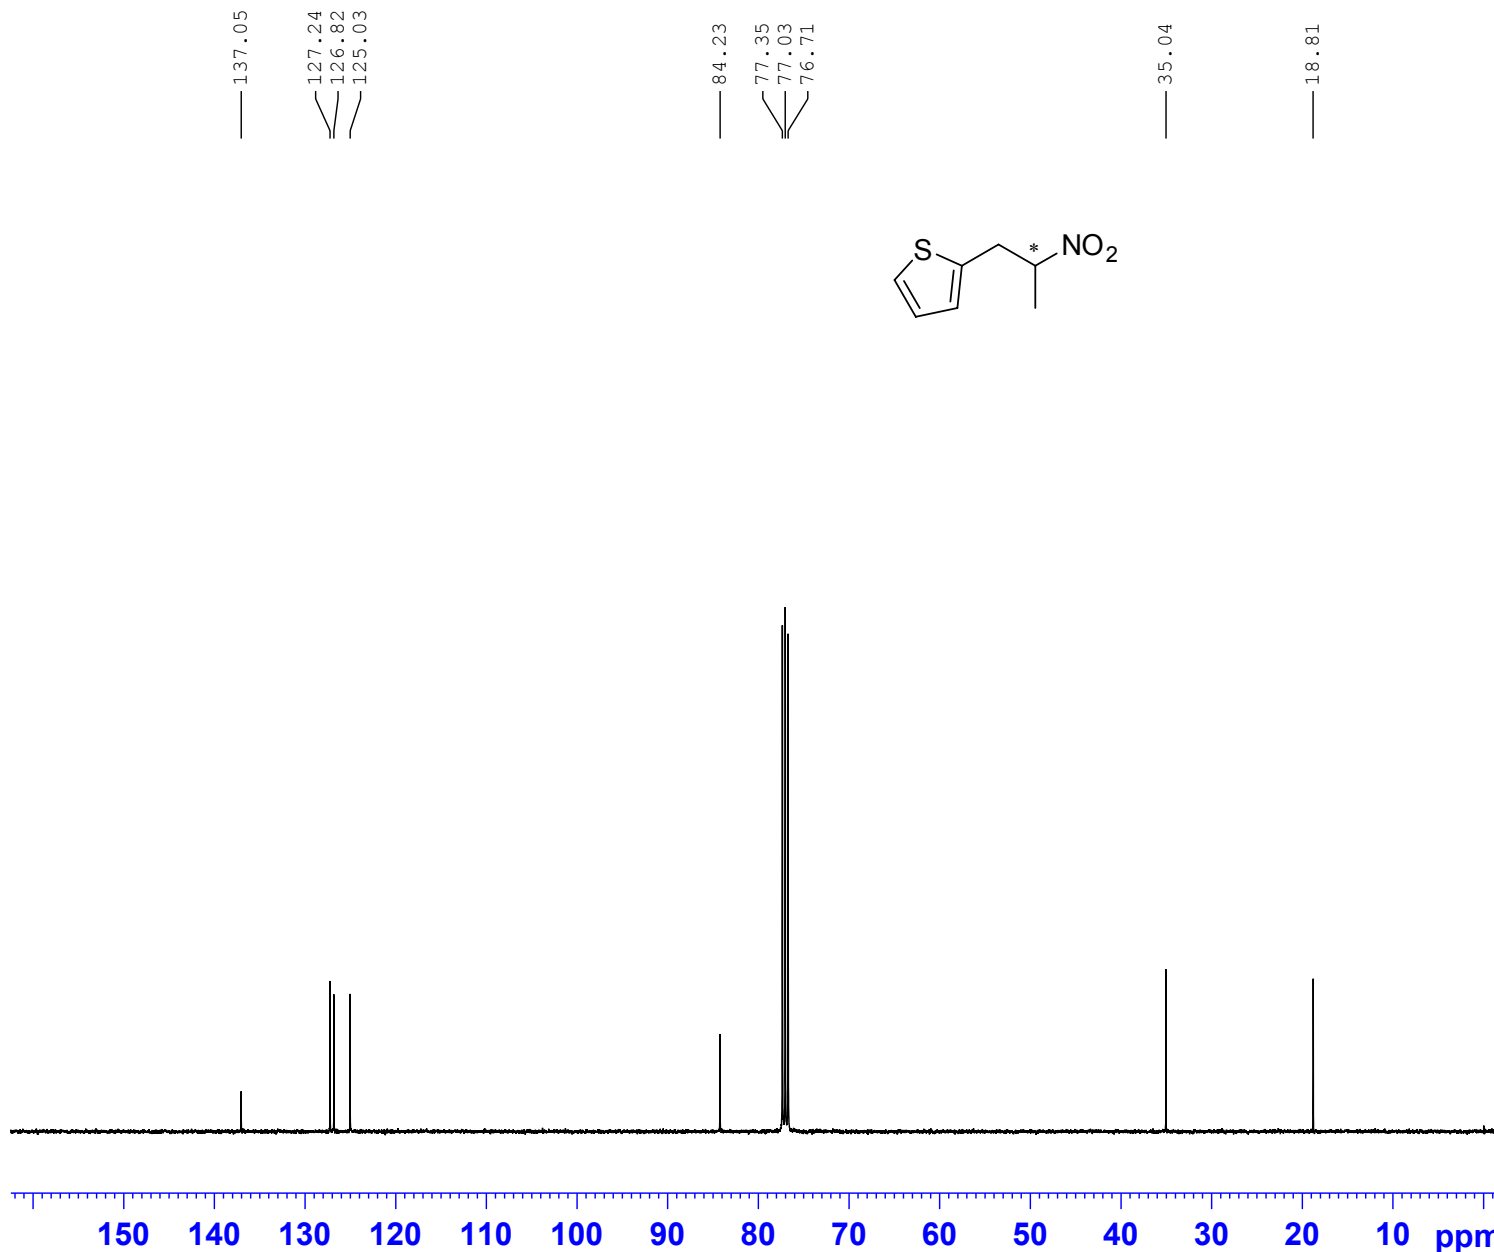

Supplement: c4cc03942d1.pdf [file c4cc03942d1.pdf]
